# Supplementary material for: DNA methylation profiles of cancer-related fatigue associated with markers of inflammation and immunometabolism
Source: Research Square preprint supplement (doi:10.21203/rs.3.rs-3332488/v1), 2023-09-28
Supplement: Supplementary file 1 [file 0fe058208c105fd51fc39449.xlsx]

## Sheet: Sheet 1 - Supplemental Table 2 
Supplemental Table 2 CpG gene expression FINAL
cpg	symbol	loc	pvLMM	fdrLMM	betaLMM
cg17466278	SULF2	5'UTR	2.24e-12	3.52e-10	-1.00353
cg16431791	ADGRE3	Body	5.69e-08	4.48e-06	-0.565743
cg24145401	AIM2	TSS1500	1.11e-06	5.86e-05	-0.257868
cg14839898	SDHD	TSS1500	8.29e-07	5.6e-05	0.586099
cg21186405	MFSD9	Body	9.75e-06	0.000354639	-0.384611
cg13316148	STAT4	Body	1.1e-06	5.86e-05	0.371742
cg10636246	AIM2	TSS1500	1.68e-06	7.96e-05	-0.268583
cg25645302	CTCF	5'UTR	5.97e-06	0.000235312	0.573702
cg16531578	TRERF1	5'UTR	3.89e-05	0.00122642	0.143349
cg19822755	YPEL3	TSS1500	4.61e-05	0.00128347	0.290689
cg00955413	TMED7-TICAM2	Body	0.000103646	0.00258023	0.594558
cg14839898	TIMM8B	Body	0.000252138	0.00542097	0.342969
cg17953136	LAPTM4A	3'UTR	0.000198217	0.00468782	-0.280076
cg25746149	CEP164	Body	0.000358834	0.00707202	0.289828
cg11226378	DPYD	Body	0.000956065	0.0180887	-0.290374
cg03356288	KLF12	5'UTR	0.00113721	0.0206885	0.667287
