# Supplementary material for: DNA methylation profiles of cancer-related fatigue associated with markers of inflammation and immunometabolism
Source: Research Square preprint supplement (doi:10.21203/rs.3.rs-3332488/v1), 2023-09-28
Supplement: Supplementary file 2 [file 31a8a1515d0586bce79a6a51.xlsx]

## Sheet: Sheet 1 - Supplemental Table 4 
Supplemental Table 4 mediationSig FINAL
cpg	chr	pos	strand	Name	Islands_Name	Relation_to_Island	UCSC_RefGene_Name	UCSC_RefGene_Accession	UCSC_RefGene_Group	inflaMarker	ACME	ACME_2.5	ACME_97.5	ACME_pv	ACME_fdr	ADE	ADE_2.5	ADE_97.5	ADE_pv	ADE_fdr
cg01183122	chr21	35884348	-	cg01183122		OpenSea	KCNE1	NM_000219	TSS1500	CRPL10F	-3.1648	-5.28875	-1.37893	0	0	-11.9697	-17.9303	-5.85882	0	0
cg01183122	chr21	35884348	-	cg01183122		OpenSea	KCNE1	NM_000219	TSS1500	IL6L10F	-2.00582	-3.89149	-0.655228	0	0	-13.6209	-19.3393	-7.73464	0	0
cg01183122	chr21	35884348	-	cg01183122		OpenSea	KCNE1	NM_000219	TSS1500	TNFR2L10F	-2.92049	-5.11931	-1.14413	0	0	-12.6714	-18.3871	-6.86525	0	0
cg05165365	chr11	48151361	+	cg05165365		OpenSea	PTPRJ;PTPRJ	NM_001098503;NM_002843	Body;Body	CRPL10F	-3.4729	-5.75956	-1.57136	0	0	-10.7109	-15.4541	-5.55788	0	0
cg05165365	chr11	48151361	+	cg05165365		OpenSea	PTPRJ;PTPRJ	NM_001098503;NM_002843	Body;Body	IL6L10F	-1.83091	-3.42366	-0.578513	0	0	-12.6867	-17.497	-7.50281	0	0
cg05165365	chr11	48151361	+	cg05165365		OpenSea	PTPRJ;PTPRJ	NM_001098503;NM_002843	Body;Body	TNFR2L10F	-2.50617	-4.37704	-1.03283	0	0	-12.0259	-17.3564	-6.73026	0	0
cg06433467	chr5	67730071	-	cg06433467		OpenSea				CRPL10F	-1.46813	-2.47451	-0.59371	0	0	-8.16782	-10.8478	-5.40565	0	0
cg06433467	chr5	67730071	-	cg06433467		OpenSea				IL6L10F	-0.732112	-1.47582	-0.162186	0.002	0.00727322	-8.86749	-11.4436	-5.92473	0	0
cg06433467	chr5	67730071	-	cg06433467		OpenSea				TNFR2L10F	-1.41188	-2.51671	-0.487068	0.004	0.0134261	-8.23255	-11.086	-5.4433	0	0
cg18363226	chr7	132741882	+	cg18363226		OpenSea	CHCHD3	NM_017812	Body	CRPL10F	-3.06567	-4.97391	-1.42658	0	0	-10.2916	-14.8926	-5.71684	0	0
cg18363226	chr7	132741882	+	cg18363226		OpenSea	CHCHD3	NM_017812	Body	IL6L10F	-1.7018	-3.21399	-0.554135	0.006	0.0191179	-11.7759	-16.4039	-7.24368	0	0
cg18363226	chr7	132741882	+	cg18363226		OpenSea	CHCHD3	NM_017812	Body	IL1raL10F	-1.76818	-3.30634	-0.592028	0.002	0.00727322	-11.8545	-15.9804	-7.41167	0	0
cg18363226	chr7	132741882	+	cg18363226		OpenSea	CHCHD3	NM_017812	Body	TNFR2L10F	-2.10554	-3.73111	-0.861586	0.002	0.00727322	-11.5323	-15.9397	-6.76934	0	0
cg16971621	chr8	142167457	-	cg16971621		OpenSea	DENND3	NM_014957	Body	CRPL10F	-3.95636	-6.39696	-1.90574	0	0	-13.9988	-20.2818	-7.93236	0	0
cg16971621	chr8	142167457	-	cg16971621		OpenSea	DENND3	NM_014957	Body	IL6L10F	-2.35074	-4.37348	-0.659191	0	0	-15.8937	-22.63	-9.50673	0	0
cg16971621	chr8	142167457	-	cg16971621		OpenSea	DENND3	NM_014957	Body	IL1raL10F	-2.4871	-4.56024	-0.836298	0	0	-15.4748	-21.5746	-8.95159	0	0
cg16971621	chr8	142167457	-	cg16971621		OpenSea	DENND3	NM_014957	Body	TNFR2L10F	-2.46093	-4.53876	-0.960443	0	0	-15.8879	-22.2565	-10.2156	0	0
cg07688032	chr19	2330963	+	cg07688032	chr19:2328364-2329089	S_Shore	SPPL2B;SPPL2B	NM_001077238;NM_152988	Body;Body	CRPL10F	3.93608	1.51275	7.07353	0	0	21.3846	12.999	30.1877	0	0
cg07688032	chr19	2330963	+	cg07688032	chr19:2328364-2329089	S_Shore	SPPL2B;SPPL2B	NM_001077238;NM_152988	Body;Body	IL6L10F	2.7403	0.767997	5.44925	0.002	0.00727322	22.3699	13.7628	31.0618	0	0
cg07688032	chr19	2330963	+	cg07688032	chr19:2328364-2329089	S_Shore	SPPL2B;SPPL2B	NM_001077238;NM_152988	Body;Body	TNFR2L10F	4.16341	1.72103	7.22985	0	0	21.391	13.2254	30.104	0	0
cg10597669	chr12	122294017	+	cg10597669		OpenSea	HPD;HPD	NM_001171993;NM_002150	Body;Body	CRPL10F	-5.91718	-9.59519	-2.76464	0	0	-18.5821	-28.7239	-9.05276	0	0
cg10597669	chr12	122294017	+	cg10597669		OpenSea	HPD;HPD	NM_001171993;NM_002150	Body;Body	IL6L10F	-2.89204	-5.54861	-0.836195	0	0	-21.8201	-31.5146	-12.4224	0	0
cg10597669	chr12	122294017	+	cg10597669		OpenSea	HPD;HPD	NM_001171993;NM_002150	Body;Body	TNFR2L10F	-4.66034	-8.23728	-1.84933	0	0	-20.3181	-29.4994	-10.6538	0	0
cg19225696	chr1	201487263	+	cg19225696		OpenSea				CRPL10F	-2.3375	-4.01099	-1.01942	0	0	-9.1184	-13.2834	-4.6873	0	0
cg19225696	chr1	201487263	+	cg19225696		OpenSea				IL6L10F	-1.06144	-2.186	-0.220675	0.014	0.0406753	-10.2802	-14.9456	-5.59867	0	0
cg19225696	chr1	201487263	+	cg19225696		OpenSea				IL1raL10F	-1.74242	-3.22744	-0.526454	0.002	0.00727322	-9.88512	-14.3896	-5.33221	0	0
cg19225696	chr1	201487263	+	cg19225696		OpenSea				TNFR2L10F	-1.86227	-3.34513	-0.701068	0	0	-9.52004	-14.1814	-5.30828	0	0
cg05773425	chr1	16644480	+	cg05773425		OpenSea	FBXO42	NM_018994	5'UTR	CRPL10F	2.18736	1.04245	3.7395	0	0	7.38952	3.8986	10.9905	0	0
cg05773425	chr1	16644480	+	cg05773425		OpenSea	FBXO42	NM_018994	5'UTR	IL6L10F	1.48081	0.505465	2.78011	0.006	0.0191179	8.26605	4.55546	11.9694	0	0
cg05773425	chr1	16644480	+	cg05773425		OpenSea	FBXO42	NM_018994	5'UTR	IL1raL10F	1.16403	0.274054	2.2563	0.01	0.0301226	8.22229	4.57856	11.5366	0	0
cg05773425	chr1	16644480	+	cg05773425		OpenSea	FBXO42	NM_018994	5'UTR	TNFR2L10F	2.10386	0.850908	3.56205	0.002	0.00727322	7.41831	3.77927	10.9347	0	0
cg12992827	chr3	101901234	+	cg12992827		OpenSea				CRPL10F	-2.39708	-3.94951	-1.06165	0	0	-7.24976	-10.3896	-4.0364	0	0
cg12992827	chr3	101901234	+	cg12992827		OpenSea				IL6L10F	-1.27653	-2.62082	-0.166008	0.016	0.0456034	-8.50623	-11.6035	-5.21387	0	0
cg12992827	chr3	101901234	+	cg12992827		OpenSea				IL1raL10F	-1.67814	-2.90354	-0.657054	0	0	-8.25006	-11.5281	-5.05128	0	0
cg12992827	chr3	101901234	+	cg12992827		OpenSea				TNFR2L10F	-1.70763	-3.1058	-0.56767	0.004	0.0134261	-8.11193	-11.3668	-4.96881	0	0
cg24272019	chr14	106376379	-	cg24272019		OpenSea				TNFR2L10F	2.23219	0.930311	3.91544	0	0	5.90632	1.52057	10.5322	0.008	0.0090217
cg19805943	chr2	85933069	+	cg19805943		OpenSea				CRPL10F	-1.52451	-2.85394	-0.506166	0.002	0.00727322	-7.93701	-11.5439	-4.11475	0	0
cg19805943	chr2	85933069	+	cg19805943		OpenSea				IL6L10F	-0.863914	-1.89632	-0.121161	0.014	0.0406753	-8.73565	-12.2528	-4.74558	0	0
cg19805943	chr2	85933069	+	cg19805943		OpenSea				IL1raL10F	-1.13903	-2.31171	-0.252421	0.01	0.0301226	-8.48962	-12.3171	-4.49873	0	0
cg19805943	chr2	85933069	+	cg19805943		OpenSea				TNFR2L10F	-1.6597	-3.09125	-0.60359	0	0	-8.289	-11.9213	-4.60397	0	0
cg06019998	chr17	15845440	-	cg06019998	chr17:15847757-15849513	N_Shelf				CRPL10F	-1.85376	-2.87925	-0.857311	0	0	-5.19574	-7.8658	-2.64875	0	0
cg06019998	chr17	15845440	-	cg06019998	chr17:15847757-15849513	N_Shelf				IL6L10F	-1.0613	-2.05526	-0.182908	0.008	0.0244802	-6.0784	-8.59225	-3.72461	0	0
cg06019998	chr17	15845440	-	cg06019998	chr17:15847757-15849513	N_Shelf				IL1raL10F	-1.00318	-1.79095	-0.38816	0	0	-6.19054	-8.54401	-3.94764	0	0
cg06019998	chr17	15845440	-	cg06019998	chr17:15847757-15849513	N_Shelf				TNFR2L10F	-1.2906	-2.19375	-0.488714	0	0	-5.88578	-8.42621	-3.37599	0	0
cg18442362	chr7	44677772	+	cg18442362		OpenSea	OGDH;OGDH;OGDH	NM_001003941;NM_001165036;NM_002541	Body;Body;Body	CRPL10F	-2.20418	-3.59894	-1.06023	0	0	-8.46441	-11.861	-5.03018	0	0
cg18442362	chr7	44677772	+	cg18442362		OpenSea	OGDH;OGDH;OGDH	NM_001003941;NM_001165036;NM_002541	Body;Body;Body	IL6L10F	-1.56015	-2.75766	-0.518212	0	0	-8.95604	-12.5796	-5.52576	0	0
cg18442362	chr7	44677772	+	cg18442362		OpenSea	OGDH;OGDH;OGDH	NM_001003941;NM_001165036;NM_002541	Body;Body;Body	TNFR2L10F	-1.82028	-3.22251	-0.631545	0	0	-8.40383	-11.8908	-4.77879	0	0
cg08010984	chr3	170964901	+	cg08010984		OpenSea	TNIK;TNIK;TNIK;TNIK;TNIK;TNIK;TNIK;TNIK	NM_001161560;NM_015028;NM_001161563;NM_001161562;NM_001161561;NM_001161566;NM_001161565;NM_001161564	Body;Body;Body;Body;Body;Body;Body;Body	CRPL10F	-2.99225	-4.97465	-1.3624	0	0	-10.1077	-15.4807	-4.94355	0	0
cg08010984	chr3	170964901	+	cg08010984		OpenSea	TNIK;TNIK;TNIK;TNIK;TNIK;TNIK;TNIK;TNIK	NM_001161560;NM_015028;NM_001161563;NM_001161562;NM_001161561;NM_001161566;NM_001161565;NM_001161564	Body;Body;Body;Body;Body;Body;Body;Body	IL6L10F	-1.5085	-3.03122	-0.431634	0	0	-11.74	-17.1975	-6.23695	0	0
cg08010984	chr3	170964901	+	cg08010984		OpenSea	TNIK;TNIK;TNIK;TNIK;TNIK;TNIK;TNIK;TNIK	NM_001161560;NM_015028;NM_001161563;NM_001161562;NM_001161561;NM_001161566;NM_001161565;NM_001161564	Body;Body;Body;Body;Body;Body;Body;Body	TNFR2L10F	-2.37095	-4.14061	-0.89629	0	0	-11.1176	-15.893	-6.39509	0	0
cg06648398	chr9	124083087	+	cg06648398		OpenSea	GSN;GSN;GSN;GSN;GSN;GSN;GSN;GSN;GSN;GSN	NM_001127663;NM_001258029;NM_001258030;NM_000177;NM_001127667;NM_001127666;NM_198252;NM_001127664;NM_001127662;NM_001127665	Body;Body;Body;Body;Body;Body;Body;Body;Body;Body	CRPL10F	-2.1549	-4.27926	-0.317832	0.014	0.0406753	-11.4219	-17.8619	-4.75883	0	0
cg17076667	chr10	121418050	-	cg17076667		OpenSea	BAG3	NM_004281	Body	TNFR2L10F	-2.19881	-3.82898	-0.895308	0	0	-9.46599	-14.2536	-5.16061	0	0
cg08381918	chr21	43221841	+	cg08381918	chr21:43221474-43221842	Island	PRDM15;PRDM15	NM_022115;NM_001040424	Body;Body	IL1raL10F	2.23304	0.330453	4.63468	0.014	0.0406753	9.76208	2.02125	17.7415	0.014	0.0153212
cg08381918	chr21	43221841	+	cg08381918	chr21:43221474-43221842	Island	PRDM15;PRDM15	NM_022115;NM_001040424	Body;Body	TNFR2L10F	2.79388	0.744027	5.52092	0.006	0.0191179	9.45291	1.48113	16.5802	0.016	0.0174112
cg04231870	chr11	65618874	-	cg04231870		OpenSea	SNX32;SNX32	NM_152760;NM_152760	ExonBnd;Body	CRPL10F	-3.59255	-5.92563	-1.6564	0	0	-11.1816	-15.92	-6.09687	0	0
cg04231870	chr11	65618874	-	cg04231870		OpenSea	SNX32;SNX32	NM_152760;NM_152760	ExonBnd;Body	IL6L10F	-1.86346	-3.50518	-0.547439	0.004	0.0134261	-13.0359	-17.7816	-8.3853	0	0
cg04231870	chr11	65618874	-	cg04231870		OpenSea	SNX32;SNX32	NM_152760;NM_152760	ExonBnd;Body	IL1raL10F	-1.63189	-3.07383	-0.511715	0.002	0.00727322	-12.8453	-17.5723	-8.22389	0	0
cg04231870	chr11	65618874	-	cg04231870		OpenSea	SNX32;SNX32	NM_152760;NM_152760	ExonBnd;Body	TNFR2L10F	-1.95092	-3.58715	-0.647608	0.002	0.00727322	-12.8663	-17.253	-8.38261	0	0
cg16669300	chr9	134882463	-	cg16669300		OpenSea	MED27;MED27	NM_004269;NM_001253881	Body;Body	CRPL10F	-2.80707	-4.56823	-1.4695	0	0	-6.85277	-10.8701	-2.79736	0	0
cg16669300	chr9	134882463	-	cg16669300		OpenSea	MED27;MED27	NM_004269;NM_001253881	Body;Body	IL6L10F	-1.41328	-2.60614	-0.446619	0.002	0.00727322	-8.42167	-12.4965	-4.33248	0	0
cg16669300	chr9	134882463	-	cg16669300		OpenSea	MED27;MED27	NM_004269;NM_001253881	Body;Body	IL1raL10F	-1.47853	-2.74689	-0.48997	0.002	0.00727322	-8.25498	-12.2993	-4.52664	0	0
cg16669300	chr9	134882463	-	cg16669300		OpenSea	MED27;MED27	NM_004269;NM_001253881	Body;Body	TNFR2L10F	-2.16773	-3.69425	-0.931636	0	0	-7.78766	-11.7329	-3.89714	0	0
cg13304206	chr4	40562130	+	cg13304206		OpenSea	RBM47	NM_001098634	5'UTR	CRPL10F	-1.84322	-3.33076	-0.69339	0	0	-10.262	-14.2831	-6.31031	0	0
cg13304206	chr4	40562130	+	cg13304206		OpenSea	RBM47	NM_001098634	5'UTR	IL6L10F	-1.42051	-2.80909	-0.444427	0.006	0.0191179	-10.6395	-14.8936	-6.43553	0	0
cg13304206	chr4	40562130	+	cg13304206		OpenSea	RBM47	NM_001098634	5'UTR	TNFR2L10F	-1.81554	-3.27876	-0.704582	0	0	-10.2635	-14.3032	-6.12674	0	0
cg19822755	chr16	30108259	-	cg19822755	chr16:30107511-30107875	S_Shore	YPEL3;YPEL3	NM_031477;NM_001145524	TSS1500;TSS1500	CRPL10F	3.42441	1.43781	5.60439	0.002	0.00727322	8.1899	4.15082	12.3338	0	0
cg19822755	chr16	30108259	-	cg19822755	chr16:30107511-30107875	S_Shore	YPEL3;YPEL3	NM_031477;NM_001145524	TSS1500;TSS1500	IL1raL10F	1.55663	0.512033	2.89756	0	0	9.95345	6.06509	13.6583	0	0
cg19822755	chr16	30108259	-	cg19822755	chr16:30107511-30107875	S_Shore	YPEL3;YPEL3	NM_031477;NM_001145524	TSS1500;TSS1500	TNFR2L10F	1.8318	0.740585	3.20529	0.002	0.00727322	9.85876	5.99183	13.7662	0	0
cg09029633	chr16	90077571	-	cg09029633		OpenSea	DBNDD1;DBNDD1;DBNDD1;DBNDD1	NM_001288708;NM_024043;NM_001042610;NM_001288709	Body;TSS1500;Body;Body	CRPL10F	3.13013	1.36305	5.33308	0	0	8.75996	2.82416	14.7458	0.002	0.00245079
cg09029633	chr16	90077571	-	cg09029633		OpenSea	DBNDD1;DBNDD1;DBNDD1;DBNDD1	NM_001288708;NM_024043;NM_001042610;NM_001288709	Body;TSS1500;Body;Body	IL6L10F	1.99245	0.657096	3.88627	0.002	0.00727322	10.258	4.16851	16.0966	0	0
cg09029633	chr16	90077571	-	cg09029633		OpenSea	DBNDD1;DBNDD1;DBNDD1;DBNDD1	NM_001288708;NM_024043;NM_001042610;NM_001288709	Body;TSS1500;Body;Body	IL1raL10F	2.52361	0.919221	4.58866	0	0	10.1207	3.94327	16.0991	0	0
cg09029633	chr16	90077571	-	cg09029633		OpenSea	DBNDD1;DBNDD1;DBNDD1;DBNDD1	NM_001288708;NM_024043;NM_001042610;NM_001288709	Body;TSS1500;Body;Body	TNFR2L10F	3.05958	1.2255	5.24803	0	0	9.19592	3.49488	15.1307	0	0
cg10724186	chr6	160227462	+	cg10724186		OpenSea	PNLDC1;PNLDC1	NM_001271862;NM_173516	Body;Body	CRPL10F	-1.69293	-3.05023	-0.620077	0	0	-5.98159	-9.61321	-2.31503	0.002	0.00245079
cg10724186	chr6	160227462	+	cg10724186		OpenSea	PNLDC1;PNLDC1	NM_001271862;NM_173516	Body;Body	IL6L10F	-1.30949	-2.45993	-0.388794	0	0	-6.52871	-10.1262	-2.58655	0	0
cg10724186	chr6	160227462	+	cg10724186		OpenSea	PNLDC1;PNLDC1	NM_001271862;NM_173516	Body;Body	IL1raL10F	-1.43477	-2.60859	-0.518361	0.002	0.00727322	-6.37826	-9.83027	-2.61072	0	0
cg10724186	chr6	160227462	+	cg10724186		OpenSea	PNLDC1;PNLDC1	NM_001271862;NM_173516	Body;Body	TNFR2L10F	-1.8932	-3.16986	-0.783622	0	0	-6.03114	-9.69517	-2.33323	0	0
cg25082943	chr12	93367516	+	cg25082943		OpenSea				CRPL10F	-2.58127	-4.31795	-1.19017	0	0	-8.83436	-13.7264	-4.20233	0.002	0.00245079
cg25082943	chr12	93367516	+	cg25082943		OpenSea				IL6L10F	-1.74662	-3.34184	-0.545479	0	0	-9.76954	-14.3225	-5.01297	0	0
cg25082943	chr12	93367516	+	cg25082943		OpenSea				IL1raL10F	-1.37553	-2.6981	-0.263112	0.016	0.0456034	-10.0215	-14.9633	-5.1932	0	0
cg25082943	chr12	93367516	+	cg25082943		OpenSea				TNFR2L10F	-1.91109	-3.49844	-0.748241	0	0	-10.0401	-14.6332	-5.45331	0	0
cg24854225	chr1	185374534	+	cg24854225		OpenSea				CRPL10F	-2.45664	-4.08059	-1.17137	0	0	-7.21387	-11.0605	-3.49619	0	0
cg24854225	chr1	185374534	+	cg24854225		OpenSea				IL6L10F	-1.3735	-2.60523	-0.477206	0.002	0.00727322	-8.33	-12.1837	-4.43102	0	0
cg24854225	chr1	185374534	+	cg24854225		OpenSea				IL1raL10F	-1.1383	-2.32099	-0.256239	0.004	0.0134261	-8.53881	-11.9791	-4.84887	0	0
cg24854225	chr1	185374534	+	cg24854225		OpenSea				TNFR2L10F	-1.54766	-2.88903	-0.583017	0	0	-8.25405	-12.0811	-4.71514	0	0
cg03304763	chr11	112037427	+	cg03304763		OpenSea	TEX12	NM_031275	TSS1500	IL6L10F	-1.08348	-2.13239	-0.243841	0.006	0.0191179	-4.96576	-8.82667	-1.21336	0.004	0.00469301
cg03304763	chr11	112037427	+	cg03304763		OpenSea	TEX12	NM_031275	TSS1500	TNFR2L10F	-1.32721	-2.56753	-0.334415	0.004	0.0134261	-4.79668	-8.48972	-0.811794	0.008	0.0090217
cg11807188	chr1	65924844	+	cg11807188		OpenSea	LEPR;LEPR;LEPR	NM_001003680;NM_001003679;NM_002303	5'UTR;5'UTR;5'UTR	CRPL10F	-5.38248	-8.93481	-2.27421	0	0	-17.2116	-26.8275	-7.59192	0	0
cg11807188	chr1	65924844	+	cg11807188		OpenSea	LEPR;LEPR;LEPR	NM_001003680;NM_001003679;NM_002303	5'UTR;5'UTR;5'UTR	IL6L10F	-2.79436	-5.66036	-0.497002	0.006	0.0191179	-20.006	-29.4381	-10.7271	0	0
cg11807188	chr1	65924844	+	cg11807188		OpenSea	LEPR;LEPR;LEPR	NM_001003680;NM_001003679;NM_002303	5'UTR;5'UTR;5'UTR	TNFR2L10F	-3.5671	-6.675	-1.23043	0	0	-18.8249	-28.0468	-9.30704	0	0
cg24023352	chr10	49540488	-	cg24023352		OpenSea	MAPK8	NM_001278547	5'UTR	CRPL10F	-1.1037	-1.94468	-0.402058	0	0	-4.47466	-6.87471	-2.15385	0	0
cg24023352	chr10	49540488	-	cg24023352		OpenSea	MAPK8	NM_001278547	5'UTR	IL6L10F	-0.768798	-1.47375	-0.233665	0	0	-4.81401	-7.18706	-2.40832	0	0
cg24023352	chr10	49540488	-	cg24023352		OpenSea	MAPK8	NM_001278547	5'UTR	TNFR2L10F	-0.994305	-1.7755	-0.351783	0	0	-4.78381	-7.1283	-2.45202	0	0
cg26605900	chr17	72614843	-	cg26605900		OpenSea	CD300E	NM_181449	Body	CRPL10F	4.07771	1.63893	7.14116	0	0	12.9776	4.92401	20.8456	0	0
cg26605900	chr17	72614843	-	cg26605900		OpenSea	CD300E	NM_181449	Body	IL6L10F	3.13622	1.03495	5.70615	0	0	14.0616	6.32651	22.3332	0	0
cg26605900	chr17	72614843	-	cg26605900		OpenSea	CD300E	NM_181449	Body	IL1raL10F	3.52281	1.29159	6.27899	0	0	14.6437	6.71993	23.2241	0.002	0.00245079
cg26605900	chr17	72614843	-	cg26605900		OpenSea	CD300E	NM_181449	Body	TNFR2L10F	4.04657	1.61242	6.79495	0	0	13.6545	5.0812	22.4416	0	0
cg10351852	chr3	45706990	+	cg10351852		OpenSea	LIMD1	NM_014240	Body	CRPL10F	2.83536	1.13572	4.91546	0	0	11.0822	5.11526	16.817	0	0
cg10351852	chr3	45706990	+	cg10351852		OpenSea	LIMD1	NM_014240	Body	IL6L10F	1.85818	0.616119	3.51989	0.002	0.00727322	12.1427	6.16459	18.1471	0	0
cg10351852	chr3	45706990	+	cg10351852		OpenSea	LIMD1	NM_014240	Body	TNFR2L10F	2.74976	1.06638	4.93003	0	0	11.6183	5.47089	17.2488	0	0
cg20995564	chr2	145172035	-	cg20995564		OpenSea	ZEB2;ZEB2	NM_014795;NM_001171653	Body;Body	CRPL10F	-1.34949	-2.20456	-0.656335	0	0	-3.71698	-5.37036	-1.95628	0	0
cg20995564	chr2	145172035	-	cg20995564		OpenSea	ZEB2;ZEB2	NM_014795;NM_001171653	Body;Body	IL1raL10F	-0.643906	-1.17505	-0.239502	0	0	-4.34671	-5.94705	-2.74778	0	0
cg20995564	chr2	145172035	-	cg20995564		OpenSea	ZEB2;ZEB2	NM_014795;NM_001171653	Body;Body	TNFR2L10F	-0.914525	-1.53366	-0.282514	0.002	0.00727322	-4.11703	-5.72817	-2.4257	0	0
cg03307560	chr16	28161100	-	cg03307560		OpenSea	XPO6;XPO6	NM_001270940;NM_015171	Body;Body	CRPL10F	-2.48614	-4.10432	-1.17049	0	0	-6.26746	-10.3896	-2.09517	0.006	0.00684628
cg03307560	chr16	28161100	-	cg03307560		OpenSea	XPO6;XPO6	NM_001270940;NM_015171	Body;Body	IL6L10F	-1.51916	-2.78711	-0.547939	0.002	0.00727322	-7.33157	-11.6216	-3.23217	0	0
cg03307560	chr16	28161100	-	cg03307560		OpenSea	XPO6;XPO6	NM_001270940;NM_015171	Body;Body	TNFR2L10F	-1.58103	-2.85781	-0.5596	0	0	-7.46286	-11.3555	-3.25679	0	0
cg06963709	chr7	155150793	+	cg06963709		OpenSea				CRPL10F	-1.22449	-2.37934	-0.317076	0.004	0.0134261	-6.20619	-9.44769	-2.8899	0	0
cg06963709	chr7	155150793	+	cg06963709		OpenSea				IL6L10F	-0.975371	-1.88198	-0.295565	0	0	-6.46223	-9.6742	-3.23657	0	0
cg06963709	chr7	155150793	+	cg06963709		OpenSea				TNFR2L10F	-1.62655	-2.79244	-0.665569	0	0	-6.03298	-9.09159	-2.76512	0	0
cg08350742	chr4	40814531	-	cg08350742		OpenSea	APBB2;APBB2;APBB2;APBB2;APBB2;APBB2;APBB2	NM_001166054;NM_001166053;NM_173075;NM_001166050;NM_004307;NM_001166052;NM_001166051	3'UTR;3'UTR;3'UTR;3'UTR;3'UTR;3'UTR;3'UTR	CRPL10F	-2.30783	-3.69107	-1.12348	0	0	-8.08753	-11.6225	-4.73816	0	0
cg08350742	chr4	40814531	-	cg08350742		OpenSea	APBB2;APBB2;APBB2;APBB2;APBB2;APBB2;APBB2	NM_001166054;NM_001166053;NM_173075;NM_001166050;NM_004307;NM_001166052;NM_001166051	3'UTR;3'UTR;3'UTR;3'UTR;3'UTR;3'UTR;3'UTR	IL6L10F	-1.5054	-2.84442	-0.479365	0.004	0.0134261	-8.81779	-12.238	-5.13864	0	0
cg08350742	chr4	40814531	-	cg08350742		OpenSea	APBB2;APBB2;APBB2;APBB2;APBB2;APBB2;APBB2	NM_001166054;NM_001166053;NM_173075;NM_001166050;NM_004307;NM_001166052;NM_001166051	3'UTR;3'UTR;3'UTR;3'UTR;3'UTR;3'UTR;3'UTR	IL1raL10F	-1.70407	-2.96667	-0.704502	0	0	-8.78206	-12.1685	-5.24923	0	0
cg08350742	chr4	40814531	-	cg08350742		OpenSea	APBB2;APBB2;APBB2;APBB2;APBB2;APBB2;APBB2	NM_001166054;NM_001166053;NM_173075;NM_001166050;NM_004307;NM_001166052;NM_001166051	3'UTR;3'UTR;3'UTR;3'UTR;3'UTR;3'UTR;3'UTR	TNFR2L10F	-1.68878	-2.98222	-0.653319	0	0	-8.6967	-12.3725	-5.35864	0	0
cg04415310	chr12	124743637	+	cg04415310		OpenSea	ZNF664-FAM101A	NM_001204299	5'UTR	CRPL10F	2.09527	1.10237	3.35327	0	0	5.56373	2.72663	8.65453	0	0
cg04415310	chr12	124743637	+	cg04415310		OpenSea	ZNF664-FAM101A	NM_001204299	5'UTR	IL6L10F	1.4162	0.451966	2.59668	0.006	0.0191179	6.13396	2.94878	9.35414	0	0
cg04415310	chr12	124743637	+	cg04415310		OpenSea	ZNF664-FAM101A	NM_001204299	5'UTR	TNFR2L10F	2.12736	0.803346	3.60766	0	0	5.43266	2.22174	8.47794	0	0
cg04070976	chr17	73577422	+	cg04070976		OpenSea				CRPL10F	3.02952	1.31319	5.07939	0	0	10.1458	4.60964	15.3523	0	0
cg04070976	chr17	73577422	+	cg04070976		OpenSea				IL6L10F	2.24458	0.740187	4.20656	0	0	11.0375	5.3157	16.7281	0.002	0.00245079
cg04070976	chr17	73577422	+	cg04070976		OpenSea				TNFR2L10F	2.70321	1.11264	4.67338	0	0	10.7235	5.05965	16.472	0	0
cg05696969	chr5	145326228	-	cg05696969		OpenSea	SH3RF2	NM_152550	Body	CRPL10F	-2.06637	-3.51276	-0.934203	0	0	-6.31707	-9.80238	-2.91581	0	0
cg05696969	chr5	145326228	-	cg05696969		OpenSea	SH3RF2	NM_152550	Body	IL6L10F	-1.12192	-2.16949	-0.368923	0	0	-7.45501	-10.9594	-4.07308	0	0
cg05696969	chr5	145326228	-	cg05696969		OpenSea	SH3RF2	NM_152550	Body	IL1raL10F	-1.02937	-2.11654	-0.208886	0.006	0.0191179	-7.52657	-11.086	-4.13273	0	0
cg05696969	chr5	145326228	-	cg05696969		OpenSea	SH3RF2	NM_152550	Body	TNFR2L10F	-1.86485	-3.11976	-0.814185	0	0	-6.63671	-10.3699	-3.09574	0.002	0.00245079
cg08830689	chr6	138062303	+	cg08830689		OpenSea				CRPL10F	-2.32252	-4.07268	-1.0365	0	0	-7.792	-11.7022	-3.70186	0	0
cg08830689	chr6	138062303	+	cg08830689		OpenSea				IL6L10F	-1.46997	-2.89483	-0.476152	0.002	0.00727322	-8.66958	-12.9877	-4.80161	0	0
cg08830689	chr6	138062303	+	cg08830689		OpenSea				TNFR2L10F	-1.44784	-2.76152	-0.375015	0	0	-8.81447	-13.1628	-4.69485	0	0
cg27057432	chr6	5619983	-	cg27057432		OpenSea	FARS2	NM_006567	Body	CRPL10F	-3.48312	-6.16303	-1.31054	0.002	0.00727322	-12.6749	-19.5659	-5.53497	0	0
cg00568296	chr20	48675540	+	cg00568296		OpenSea				CRPL10F	2.34675	0.874215	4.11068	0.004	0.0134261	5.24104	0.211725	10.2132	0.042	0.0440543
cg00568296	chr20	48675540	+	cg00568296		OpenSea				IL6L10F	1.55061	0.387073	3.01272	0.006	0.0191179	5.88174	0.498444	11.289	0.036	0.0379672
cg00568296	chr20	48675540	+	cg00568296		OpenSea				TNFR2L10F	3.23304	1.42491	5.51954	0	0	4.91584	-0.872949	10.0643	0.092	0.0946626
cg20179730	chr13	22111377	-	cg20179730		OpenSea	MICU2	NM_152726	Body	CRPL10F	-1.36965	-2.63593	-0.252184	0.008	0.0244802	-6.7499	-10.4999	-3.05689	0	0
cg20179730	chr13	22111377	-	cg20179730		OpenSea	MICU2	NM_152726	Body	IL6L10F	-1.15763	-2.28286	-0.360697	0	0	-7.04773	-10.7827	-3.04636	0	0
cg20179730	chr13	22111377	-	cg20179730		OpenSea	MICU2	NM_152726	Body	TNFR2L10F	-2.00184	-3.49455	-0.826458	0	0	-6.38724	-10.1694	-2.5774	0	0
cg01271695	chr2	1719323	-	cg01271695		OpenSea	PXDN	NM_012293	Body	TNFR2L10F	1.90651	0.431437	3.69496	0.008	0.0244802	7.56058	2.42193	12.9374	0.004	0.00469301
cg02940661	chr14	106382755	+	cg02940661		OpenSea	KIAA0125	NR_026800	TSS1500	TNFR2L10F	1.94743	0.534836	3.72933	0	0	6.97079	1.90844	12.1262	0.006	0.00684628
cg12772487	chr20	33145872	-	cg12772487	chr20:33146135-33147318	N_Shore	MAP1LC3A;MAP1LC3A	NM_032514;NM_181509	TSS1500;Body	IL6L10F	2.0918	0.432272	4.16291	0.008	0.0244802	12.1923	4.4786	19.7405	0	0
cg26416615	chr10	63751843	+	cg26416615		OpenSea	ARID5B	NM_032199	Body	CRPL10F	-2.71503	-4.49632	-1.10839	0.002	0.00727322	-6.12077	-9.2705	-2.89831	0	0
cg26416615	chr10	63751843	+	cg26416615		OpenSea	ARID5B	NM_032199	Body	IL1raL10F	-1.41869	-2.5577	-0.521978	0	0	-7.58325	-10.9033	-4.7044	0	0
cg26416615	chr10	63751843	+	cg26416615		OpenSea	ARID5B	NM_032199	Body	TNFR2L10F	-1.63406	-2.9318	-0.651286	0	0	-7.10058	-10.1566	-3.98884	0	0
cg07138962	chr14	100035588	+	cg07138962		OpenSea	CCDC85C	NM_001144995	Body	CRPL10F	3.05664	1.26188	5.4907	0	0	7.01974	0.565098	13.2115	0.03	0.0318757
cg07138962	chr14	100035588	+	cg07138962		OpenSea	CCDC85C	NM_001144995	Body	IL6L10F	2.98779	1.11455	5.34246	0	0	6.99776	0.477812	13.7705	0.042	0.0440543
cg07138962	chr14	100035588	+	cg07138962		OpenSea	CCDC85C	NM_001144995	Body	TNFR2L10F	3.98818	1.89823	6.84655	0	0	6.04202	-0.87494	12.5227	0.09	0.0926753
cg24522373	chr9	92331809	-	cg24522373		OpenSea	UNQ6494	NR_024280	Body	CRPL10F	2.90153	1.32496	4.89863	0	0	12.422	7.79293	16.9852	0	0
cg24522373	chr9	92331809	-	cg24522373		OpenSea	UNQ6494	NR_024280	Body	IL6L10F	1.44755	0.333942	2.99798	0	0	13.9602	8.36692	19.3421	0	0
cg24522373	chr9	92331809	-	cg24522373		OpenSea	UNQ6494	NR_024280	Body	TNFR2L10F	2.06378	0.736849	3.95811	0	0	13.4617	8.40561	18.7434	0	0
cg04268643	chr17	76037239	+	cg04268643	chr17:76037074-76037323	Island	TNRC6C;TNRC6C	NM_018996;NM_001142640	5'UTR;5'UTR	CRPL10F	2.47034	0.479325	4.75975	0.01	0.0301226	5.23914	-1.37386	12.0083	0.118	0.120817
cg04268643	chr17	76037239	+	cg04268643	chr17:76037074-76037323	Island	TNRC6C;TNRC6C	NM_018996;NM_001142640	5'UTR;5'UTR	TNFR2L10F	2.59312	0.797284	4.8373	0.004	0.0134261	5.79719	-0.576698	11.6701	0.068	0.070505
cg15150970	chr2	25473529	-	cg15150970	chr2:25474757-25475598	N_Shore	DNMT3A;DNMT3A;DNMT3A	NM_022552;NM_175629;NM_153759	Body;Body;Body	CRPL10F	3.60386	0.794924	6.98337	0.006	0.0191179	11.3237	1.81713	20.8247	0.016	0.0174112
cg15150970	chr2	25473529	-	cg15150970	chr2:25474757-25475598	N_Shore	DNMT3A;DNMT3A;DNMT3A	NM_022552;NM_175629;NM_153759	Body;Body;Body	TNFR2L10F	3.72	1.15158	7.03764	0.002	0.00727322	11.5374	1.9243	21.1973	0.016	0.0174112
cg04331199	chr1	67227248	+	cg04331199		OpenSea	TCTEX1D1	NM_152665	Body	CRPL10F	-3.23803	-5.19941	-1.57099	0	0	-8.52001	-12.6916	-4.10992	0	0
cg04331199	chr1	67227248	+	cg04331199		OpenSea	TCTEX1D1	NM_152665	Body	IL6L10F	-1.87083	-3.48189	-0.469373	0.004	0.0134261	-9.81236	-14.5527	-5.58266	0	0
cg04331199	chr1	67227248	+	cg04331199		OpenSea	TCTEX1D1	NM_152665	Body	IL1raL10F	-1.41939	-2.69532	-0.359582	0.008	0.0244802	-10.4835	-14.7204	-5.74399	0	0
cg04331199	chr1	67227248	+	cg04331199		OpenSea	TCTEX1D1	NM_152665	Body	TNFR2L10F	-2.25402	-3.88677	-1.01204	0	0	-9.63997	-13.8848	-5.33187	0	0
cg00159243	chr12	109023799	-	cg00159243		OpenSea	SELPLG	NM_003006	5'UTR	CRPL10F	-4.23619	-6.79639	-2.15042	0	0	-11.6656	-17.4991	-5.79038	0	0
cg00159243	chr12	109023799	-	cg00159243		OpenSea	SELPLG	NM_003006	5'UTR	IL1raL10F	-2.3304	-4.35283	-0.917824	0	0	-13.516	-19.324	-8.12439	0	0
cg00159243	chr12	109023799	-	cg00159243		OpenSea	SELPLG	NM_003006	5'UTR	TNFR2L10F	-3.22964	-5.60954	-1.22201	0	0	-12.7895	-18.7616	-6.88462	0	0
cg08714061	chr9	126908822	-	cg08714061		OpenSea				CRPL10F	-1.44636	-2.71221	-0.352029	0.006	0.0191179	-6.04283	-9.79645	-2.36061	0.002	0.00245079
cg08714061	chr9	126908822	-	cg08714061		OpenSea				TNFR2L10F	-1.42332	-2.70768	-0.44148	0	0	-6.2807	-9.73496	-2.59116	0	0
cg16713588	chr17	62274272	+	cg16713588		OpenSea	TEX2;TEX2;TEX2	NM_001288733;NM_001288732;NM_018469	Body;Body;Body	CRPL10F	-2.48576	-4.59001	-0.838239	0.002	0.00727322	-12.0626	-17.8247	-6.8164	0	0
cg16713588	chr17	62274272	+	cg16713588		OpenSea	TEX2;TEX2;TEX2	NM_001288733;NM_001288732;NM_018469	Body;Body;Body	IL6L10F	-1.95269	-3.7878	-0.652387	0	0	-12.7513	-18.6464	-6.95581	0	0
cg16713588	chr17	62274272	+	cg16713588		OpenSea	TEX2;TEX2;TEX2	NM_001288733;NM_001288732;NM_018469	Body;Body;Body	TNFR2L10F	-2.2031	-4.01362	-0.836326	0	0	-12.4773	-18.5646	-6.77558	0	0
cg16648387	chr1	62729617	+	cg16648387		OpenSea	KANK4	NM_181712	Body	CRPL10F	-1.85868	-3.06264	-0.780047	0	0	-7.84786	-11.5914	-4.05709	0	0
cg16648387	chr1	62729617	+	cg16648387		OpenSea	KANK4	NM_181712	Body	IL6L10F	-1.10892	-2.09967	-0.329293	0	0	-8.86481	-12.3738	-5.19957	0	0
cg16648387	chr1	62729617	+	cg16648387		OpenSea	KANK4	NM_181712	Body	TNFR2L10F	-1.7703	-3.00049	-0.78045	0	0	-8.11986	-11.6283	-4.34941	0	0
cg10545338	chr8	48556968	-	cg10545338		OpenSea	SPIDR;SPIDR;SPIDR;SPIDR	NR_104581;NM_001080394;NM_001282916;NM_001282919	Body;Body;Body;Body	CRPL10F	-2.89507	-4.87166	-1.16494	0	0	-11.5208	-17.2282	-6.14957	0	0
cg10545338	chr8	48556968	-	cg10545338		OpenSea	SPIDR;SPIDR;SPIDR;SPIDR	NR_104581;NM_001080394;NM_001282916;NM_001282919	Body;Body;Body;Body	IL6L10F	-2.14803	-3.92058	-0.694761	0	0	-12.2528	-17.9054	-6.98389	0	0
cg10545338	chr8	48556968	-	cg10545338		OpenSea	SPIDR;SPIDR;SPIDR;SPIDR	NR_104581;NM_001080394;NM_001282916;NM_001282919	Body;Body;Body;Body	IL1raL10F	-1.70425	-3.43125	-0.33097	0.008	0.0244802	-12.8619	-17.9148	-7.2836	0	0
cg10545338	chr8	48556968	-	cg10545338		OpenSea	SPIDR;SPIDR;SPIDR;SPIDR	NR_104581;NM_001080394;NM_001282916;NM_001282919	Body;Body;Body;Body	TNFR2L10F	-2.7226	-5.01113	-1.12869	0	0	-11.8411	-17.3919	-6.02338	0	0
cg05708963	chr5	14583002	-	cg05708963	chr5:14581497-14582569	S_Shore	FAM105A	NM_019018	Body	CRPL10F	3.39944	1.54496	5.69948	0	0	10.4767	4.3133	16.6377	0	0
cg05708963	chr5	14583002	-	cg05708963	chr5:14581497-14582569	S_Shore	FAM105A	NM_019018	Body	IL6L10F	1.90363	0.604723	3.57979	0.002	0.00727322	11.5558	5.51283	17.9275	0	0
cg05708963	chr5	14583002	-	cg05708963	chr5:14581497-14582569	S_Shore	FAM105A	NM_019018	Body	IL1raL10F	1.89225	0.438063	3.8693	0.01	0.0301226	12.102	6.05262	18.2709	0	0
cg05708963	chr5	14583002	-	cg05708963	chr5:14581497-14582569	S_Shore	FAM105A	NM_019018	Body	TNFR2L10F	3.03543	1.22844	5.46202	0	0	11.0362	4.47306	17.3658	0.002	0.00245079
cg26859083	chr3	55002054	-	cg26859083		OpenSea	LRTM1;CACNA2D3	NM_001304389;NM_018398	TSS1500;Body	CRPL10F	2.6141	1.12295	4.44603	0	0	9.94226	5.05709	14.5724	0	0
cg26859083	chr3	55002054	-	cg26859083		OpenSea	LRTM1;CACNA2D3	NM_001304389;NM_018398	TSS1500;Body	IL6L10F	2.30321	0.85229	4.11811	0.002	0.00727322	10.2405	5.07356	15.2271	0	0
cg26859083	chr3	55002054	-	cg26859083		OpenSea	LRTM1;CACNA2D3	NM_001304389;NM_018398	TSS1500;Body	IL1raL10F	1.53686	0.40293	2.93399	0	0	10.7824	5.95457	15.4736	0	0
cg26859083	chr3	55002054	-	cg26859083		OpenSea	LRTM1;CACNA2D3	NM_001304389;NM_018398	TSS1500;Body	TNFR2L10F	2.60444	1.04805	4.55005	0	0	9.86606	5.1563	14.7066	0	0
cg18710674	chr22	22762784	-	cg18710674		OpenSea				CRPL10F	-3.52154	-6.60138	-1.09966	0.002	0.00727322	-19.0555	-27.7494	-10.9043	0	0
cg18710674	chr22	22762784	-	cg18710674		OpenSea				IL6L10F	-2.67224	-5.08219	-0.799118	0.002	0.00727322	-20.6281	-28.7454	-12.1025	0	0
cg18710674	chr22	22762784	-	cg18710674		OpenSea				TNFR2L10F	-2.45897	-5.11144	-0.438617	0.016	0.0456034	-19.9227	-28.152	-11.4999	0	0
cg21088514	chr21	35884376	-	cg21088514		OpenSea	KCNE1	NM_000219	TSS1500	CRPL10F	-3.24052	-5.41744	-1.36575	0	0	-12.7076	-19.4531	-6.21985	0	0
cg21088514	chr21	35884376	-	cg21088514		OpenSea	KCNE1	NM_000219	TSS1500	IL6L10F	-2.11014	-4.00732	-0.661823	0.002	0.00727322	-13.8579	-20.3278	-7.11138	0	0
cg21088514	chr21	35884376	-	cg21088514		OpenSea	KCNE1	NM_000219	TSS1500	TNFR2L10F	-3.18899	-5.66981	-1.32331	0	0	-13.1131	-19.9298	-7.22928	0	0
cg26010546	chr18	52490607	-	cg26010546		OpenSea				CRPL10F	-2.65832	-4.20318	-1.24937	0	0	-6.7279	-10.7528	-2.65179	0.002	0.00245079
cg26010546	chr18	52490607	-	cg26010546		OpenSea				IL6L10F	-1.90166	-3.29206	-0.764771	0	0	-7.40472	-11.674	-2.93915	0	0
cg26010546	chr18	52490607	-	cg26010546		OpenSea				TNFR2L10F	-1.89753	-3.42154	-0.71397	0	0	-7.41665	-11.8087	-3.00181	0	0
cg09902898	chr4	110001222	-	cg09902898		OpenSea	COL25A1;COL25A1;COL25A1;COL25A1	NR_045756;NM_198721;NM_001256074;NM_032518	Body;Body;Body;Body	TNFR2L10F	-1.20488	-2.34176	-0.331241	0.008	0.0244802	-3.1999	-6.58902	0.216465	0.066	0.0685365
cg14330293	chr17	1374051	+	cg14330293	chr17:1375216-1375460	N_Shore	MYO1C;MYO1C;MYO1C	NM_001080779;NM_033375;NM_001080950	Body;Body;Body	CRPL10F	3.26218	1.23419	5.85405	0	0	14.8174	7.86103	21.6701	0	0
cg14330293	chr17	1374051	+	cg14330293	chr17:1375216-1375460	N_Shore	MYO1C;MYO1C;MYO1C	NM_001080779;NM_033375;NM_001080950	Body;Body;Body	IL6L10F	2.13606	0.589254	4.06954	0	0	16.2176	8.86337	23.3946	0	0
cg14330293	chr17	1374051	+	cg14330293	chr17:1375216-1375460	N_Shore	MYO1C;MYO1C;MYO1C	NM_001080779;NM_033375;NM_001080950	Body;Body;Body	TNFR2L10F	3.65646	1.35168	6.28302	0.002	0.00727322	14.8164	8.09303	21.6053	0	0
cg11642336	chr7	30329949	+	cg11642336		OpenSea	MIR550B1;ZNRF2	NR_037513;NM_147128	TSS1500;Body	CRPL10F	-2.78115	-4.69314	-1.2029	0	0	-8.14285	-13.0114	-3.37907	0.002	0.00245079
cg11642336	chr7	30329949	+	cg11642336		OpenSea	MIR550B1;ZNRF2	NR_037513;NM_147128	TSS1500;Body	IL6L10F	-1.50043	-2.79466	-0.437929	0.002	0.00727322	-9.472	-14.4036	-4.65341	0.002	0.00245079
cg11642336	chr7	30329949	+	cg11642336		OpenSea	MIR550B1;ZNRF2	NR_037513;NM_147128	TSS1500;Body	IL1raL10F	-1.87289	-3.4845	-0.615043	0	0	-9.37264	-14.295	-4.40348	0	0
cg11642336	chr7	30329949	+	cg11642336		OpenSea	MIR550B1;ZNRF2	NR_037513;NM_147128	TSS1500;Body	TNFR2L10F	-2.60363	-4.55397	-1.00757	0	0	-8.49473	-13.5104	-3.81878	0	0
cg13163786	chr11	121411582	+	cg13163786		OpenSea	SORL1	NM_003105	Body	CRPL10F	-2.09193	-3.36594	-0.958923	0	0	-6.47367	-9.9037	-3.2675	0	0
cg13163786	chr11	121411582	+	cg13163786		OpenSea	SORL1	NM_003105	Body	IL6L10F	-1.40997	-2.6268	-0.406115	0.008	0.0244802	-7.16435	-10.5397	-3.98458	0	0
cg13163786	chr11	121411582	+	cg13163786		OpenSea	SORL1	NM_003105	Body	IL1raL10F	-1.2201	-2.27633	-0.417443	0	0	-7.56944	-10.45	-4.52657	0	0
cg13163786	chr11	121411582	+	cg13163786		OpenSea	SORL1	NM_003105	Body	TNFR2L10F	-1.77927	-3.04535	-0.73804	0	0	-6.84737	-9.97473	-3.62549	0	0
cg17466278	chr20	46391709	-	cg17466278		OpenSea	SULF2;SULF2;SULF2	NM_018837;NM_001161841;NM_198596	5'UTR;5'UTR;5'UTR	CRPL10F	4.82793	2.46384	7.73277	0	0	12.6668	4.87316	20.2101	0.002	0.00245079
cg17466278	chr20	46391709	-	cg17466278		OpenSea	SULF2;SULF2;SULF2	NM_018837;NM_001161841;NM_198596	5'UTR;5'UTR;5'UTR	IL6L10F	3.12022	1.11554	5.68885	0.002	0.00727322	14.4699	6.47579	22.1537	0	0
cg17466278	chr20	46391709	-	cg17466278		OpenSea	SULF2;SULF2;SULF2	NM_018837;NM_001161841;NM_198596	5'UTR;5'UTR;5'UTR	IL1raL10F	2.14542	0.332873	4.36522	0.014	0.0406753	15.27	7.87408	23.0349	0	0
cg17466278	chr20	46391709	-	cg17466278		OpenSea	SULF2;SULF2;SULF2	NM_018837;NM_001161841;NM_198596	5'UTR;5'UTR;5'UTR	TNFR2L10F	3.77214	1.62567	6.55291	0	0	13.688	6.09096	21.5286	0	0
cg17155829	chr19	7413575	-	cg17155829		OpenSea				CRPL10F	-2.33129	-4.14943	-0.891686	0	0	-7.84168	-12.7451	-2.8151	0	0
cg17155829	chr19	7413575	-	cg17155829		OpenSea				IL6L10F	-1.5351	-3.01078	-0.432441	0.002	0.00727322	-8.98942	-13.9655	-3.80487	0	0
cg17155829	chr19	7413575	-	cg17155829		OpenSea				TNFR2L10F	-3.08829	-5.078	-1.36263	0	0	-7.31435	-11.8489	-2.28213	0.006	0.00684628
cg27310092	chr1	151945663	-	cg27310092		OpenSea				CRPL10F	-2.37972	-3.94759	-1.14053	0	0	-10.0109	-13.7225	-5.91611	0	0
cg27310092	chr1	151945663	-	cg27310092		OpenSea				IL6L10F	-1.29815	-2.4268	-0.308406	0	0	-11.0358	-14.8691	-6.84514	0	0
cg27310092	chr1	151945663	-	cg27310092		OpenSea				IL1raL10F	-1.5044	-2.70702	-0.607224	0	0	-10.8462	-14.6331	-7.20304	0	0
cg27310092	chr1	151945663	-	cg27310092		OpenSea				TNFR2L10F	-2.04547	-3.64011	-0.621175	0.004	0.0134261	-10.3617	-14.4907	-6.487	0	0
cg24145401	chr1	159047177	-	cg24145401		OpenSea	AIM2	NM_004833	TSS1500	CRPL10F	-1.89669	-3.0304	-0.954002	0	0	-4.40167	-6.95663	-1.69571	0.002	0.00245079
cg24145401	chr1	159047177	-	cg24145401		OpenSea	AIM2	NM_004833	TSS1500	IL6L10F	-1.11969	-2.04848	-0.360874	0.002	0.00727322	-5.17158	-7.52736	-2.60823	0	0
cg24145401	chr1	159047177	-	cg24145401		OpenSea	AIM2	NM_004833	TSS1500	IL1raL10F	-1.13401	-2.05939	-0.434088	0	0	-5.13019	-7.71166	-2.39724	0	0
cg24145401	chr1	159047177	-	cg24145401		OpenSea	AIM2	NM_004833	TSS1500	TNFR2L10F	-1.27561	-2.16192	-0.506676	0	0	-5.08847	-7.54802	-2.54134	0	0
cg02228492	chr17	14224797	-	cg02228492		OpenSea	HS3ST3B1	NM_006041	Body	CRPL10F	-1.94655	-3.51683	-0.674392	0	0	-9.92625	-14.3887	-5.21082	0	0
cg02228492	chr17	14224797	-	cg02228492		OpenSea	HS3ST3B1	NM_006041	Body	IL6L10F	-1.76931	-3.34458	-0.612495	0	0	-10.223	-15.0908	-5.36813	0	0
cg10636246	chr1	159046973	+	cg10636246		OpenSea	AIM2	NM_004833	TSS1500	CRPL10F	-2.09061	-3.28806	-1.04733	0	0	-5.93986	-8.57289	-3.41367	0	0
cg10636246	chr1	159046973	+	cg10636246		OpenSea	AIM2	NM_004833	TSS1500	IL6L10F	-1.20949	-2.23675	-0.340883	0.002	0.00727322	-6.62373	-9.39229	-3.92616	0	0
cg10636246	chr1	159046973	+	cg10636246		OpenSea	AIM2	NM_004833	TSS1500	IL1raL10F	-1.11592	-1.95343	-0.441091	0	0	-6.7654	-9.56694	-4.02529	0	0
cg10636246	chr1	159046973	+	cg10636246		OpenSea	AIM2	NM_004833	TSS1500	TNFR2L10F	-1.27684	-2.26554	-0.504918	0	0	-6.61524	-9.24129	-3.99452	0	0
cg13659875	chr8	9045074	+	cg13659875		OpenSea	LOC101929128	NR_125431	TSS1500	CRPL10F	-5.6344	-9.39814	-2.35569	0	0	-20.2035	-30.2879	-10.2518	0	0
cg13659875	chr8	9045074	+	cg13659875		OpenSea	LOC101929128	NR_125431	TSS1500	IL6L10F	-3.23022	-6.06008	-0.892613	0.002	0.00727322	-22.8504	-32.4676	-12.7454	0	0
cg13659875	chr8	9045074	+	cg13659875		OpenSea	LOC101929128	NR_125431	TSS1500	TNFR2L10F	-5.46489	-9.3505	-2.32887	0	0	-20.1386	-30.0597	-9.6406	0	0
cg07388661	chr6	158663595	-	cg07388661		OpenSea				CRPL10F	-2.53496	-4.40704	-1.0394	0	0	-11.2616	-15.9161	-6.60092	0	0
cg07388661	chr6	158663595	-	cg07388661		OpenSea				IL6L10F	-1.96089	-3.62492	-0.621412	0	0	-11.9891	-17.0629	-6.8878	0	0
cg07388661	chr6	158663595	-	cg07388661		OpenSea				IL1raL10F	-1.37862	-2.90303	-0.317354	0.01	0.0301226	-12.4448	-17.3317	-7.80736	0	0
cg07388661	chr6	158663595	-	cg07388661		OpenSea				TNFR2L10F	-1.72455	-3.32261	-0.502662	0	0	-12.013	-17.1692	-7.37079	0	0
cg04656009	chr17	32645806	-	cg04656009		OpenSea	CCL8	NM_005623	TSS1500	CRPL10F	-2.60332	-4.85115	-0.797388	0.002	0.00727322	-12.632	-18.5573	-6.46904	0	0
cg04656009	chr17	32645806	-	cg04656009		OpenSea	CCL8	NM_005623	TSS1500	IL1raL10F	-1.84921	-3.99224	-0.27158	0.016	0.0456034	-13.1428	-19.3961	-6.57504	0	0
cg02392359	chr15	55572079	+	cg02392359		OpenSea	RAB27A	NM_183235	5'UTR	CRPL10F	-2.09464	-3.36053	-1.03736	0	0	-5.68519	-8.88631	-2.61286	0	0
cg02392359	chr15	55572079	+	cg02392359		OpenSea	RAB27A	NM_183235	5'UTR	IL6L10F	-1.41681	-2.5556	-0.393871	0.006	0.0191179	-6.60994	-9.99125	-3.34119	0	0
cg02392359	chr15	55572079	+	cg02392359		OpenSea	RAB27A	NM_183235	5'UTR	IL1raL10F	-1.38019	-2.4589	-0.570783	0	0	-6.57227	-9.6936	-3.52461	0	0
cg02392359	chr15	55572079	+	cg02392359		OpenSea	RAB27A	NM_183235	5'UTR	TNFR2L10F	-1.82931	-3.0777	-0.761641	0	0	-6.05232	-8.99791	-3.02307	0	0
cg22895728	chr12	93531972	-	cg22895728		OpenSea	LOC643339	NR_040096	Body	CRPL10F	-3.14185	-5.09799	-1.46761	0	0	-10.2519	-15.1018	-5.55145	0	0
cg22895728	chr12	93531972	-	cg22895728		OpenSea	LOC643339	NR_040096	Body	IL6L10F	-1.70866	-3.29822	-0.51592	0	0	-11.7074	-16.1809	-7.21594	0	0
cg22895728	chr12	93531972	-	cg22895728		OpenSea	LOC643339	NR_040096	Body	IL1raL10F	-1.79891	-3.30382	-0.691411	0	0	-11.5652	-15.9419	-7.29623	0	0
cg22895728	chr12	93531972	-	cg22895728		OpenSea	LOC643339	NR_040096	Body	TNFR2L10F	-2.00251	-3.53803	-0.88462	0	0	-11.31	-15.6312	-6.71056	0	0
cg14216476	chr3	129636326	+	cg14216476		OpenSea				CRPL10F	3.72375	1.73333	5.8571	0	0	5.85029	1.83325	9.82799	0.006	0.00684628
cg14216476	chr3	129636326	+	cg14216476		OpenSea				IL1raL10F	1.56416	0.610171	2.8418	0	0	8.11393	4.35769	11.9257	0	0
cg14216476	chr3	129636326	+	cg14216476		OpenSea				TNFR2L10F	2.1127	0.859759	3.61932	0	0	7.50923	3.60376	11.2055	0	0
cg02300329	chr14	55574999	-	cg02300329		OpenSea				CRPL10F	-3.82764	-6.42126	-1.92717	0	0	-10.8709	-16.8404	-5.09716	0	0
cg02300329	chr14	55574999	-	cg02300329		OpenSea				IL6L10F	-2.04826	-3.88023	-0.575774	0	0	-13.1285	-19.2772	-7.09965	0	0
cg02300329	chr14	55574999	-	cg02300329		OpenSea				TNFR2L10F	-2.81182	-5.09149	-1.0959	0	0	-12.2806	-18.1892	-6.56591	0	0
cg00457165	chr6	31088366	+	cg00457165		OpenSea	CDSN;PSORS1C1	NM_001264;NM_014068	TSS200;5'UTR	CRPL10F	1.92332	0.68028	3.46181	0.004	0.0134261	3.58449	-0.967833	7.98119	0.136	0.138878
cg00457165	chr6	31088366	+	cg00457165		OpenSea	CDSN;PSORS1C1	NM_001264;NM_014068	TSS200;5'UTR	IL6L10F	1.43452	0.447863	2.61986	0	0	3.77632	-0.388192	8.45181	0.098	0.10076
cg00457165	chr6	31088366	+	cg00457165		OpenSea	CDSN;PSORS1C1	NM_001264;NM_014068	TSS200;5'UTR	TNFR2L10F	1.74056	0.478614	3.40953	0.004	0.0134261	3.89207	-0.780573	8.69367	0.086	0.088624
cg13978081	chr6	116952796	+	cg13978081		OpenSea	RSPH4A;RSPH4A	NM_001161664;NM_001010892	Body;Body	CRPL10F	1.9216	0.374853	3.64955	0.014	0.0406753	10.1477	4.43336	15.175	0.002	0.00245079
cg13978081	chr6	116952796	+	cg13978081		OpenSea	RSPH4A;RSPH4A	NM_001161664;NM_001010892	Body;Body	TNFR2L10F	2.17304	0.657967	4.12274	0.004	0.0134261	10.5119	4.45474	15.9913	0	0
cg04512965	chr19	6038846	-	cg04512965	chr19:6039990-6040228	N_Shore	RFX2;RFX2	NM_000635;NM_134433	Body;Body	CRPL10F	-3.75057	-6.42999	-1.69428	0	0	-14.2647	-21.1753	-6.58937	0	0
cg04512965	chr19	6038846	-	cg04512965	chr19:6039990-6040228	N_Shore	RFX2;RFX2	NM_000635;NM_134433	Body;Body	IL1raL10F	-2.21125	-4.59714	-0.561192	0.004	0.0134261	-15.9174	-22.5152	-8.78285	0	0
cg04512965	chr19	6038846	-	cg04512965	chr19:6039990-6040228	N_Shore	RFX2;RFX2	NM_000635;NM_134433	Body;Body	TNFR2L10F	-2.87696	-5.23322	-1.14574	0	0	-15.6606	-23.0078	-8.0776	0	0
cg25488374	chr12	107799002	-	cg25488374		OpenSea	BTBD11	NM_001018072	Body	CRPL10F	-2.96109	-4.89328	-1.34239	0	0	-10.268	-14.9922	-5.27374	0	0
cg25488374	chr12	107799002	-	cg25488374		OpenSea	BTBD11	NM_001018072	Body	IL6L10F	-1.8383	-3.71845	-0.590276	0.002	0.00727322	-11.6814	-16.3632	-7.07718	0	0
cg25488374	chr12	107799002	-	cg25488374		OpenSea	BTBD11	NM_001018072	Body	TNFR2L10F	-2.52106	-4.27152	-0.997946	0	0	-10.6774	-15.6791	-5.62097	0	0
cg00619207	chr1	111743368	+	cg00619207	chr1:111746337-111747303	N_Shelf	DENND2D	NM_024901	TSS200	CRPL10F	-3.31799	-5.44161	-1.52813	0	0	-11.4175	-16.9448	-6.09465	0	0
cg00619207	chr1	111743368	+	cg00619207	chr1:111746337-111747303	N_Shelf	DENND2D	NM_024901	TSS200	IL6L10F	-2.34963	-4.38565	-0.715402	0.002	0.00727322	-12.7115	-19.1644	-6.95611	0	0
cg00619207	chr1	111743368	+	cg00619207	chr1:111746337-111747303	N_Shelf	DENND2D	NM_024901	TSS200	IL1raL10F	-1.78935	-3.62209	-0.32596	0.012	0.0353974	-13.3462	-19.1448	-7.68004	0	0
cg00619207	chr1	111743368	+	cg00619207	chr1:111746337-111747303	N_Shelf	DENND2D	NM_024901	TSS200	TNFR2L10F	-2.90507	-4.97848	-1.13406	0	0	-12.1711	-18.326	-6.33909	0	0
cg06750745	chr4	184181896	-	cg06750745		OpenSea	WWC2	NM_024949	Body	CRPL10F	-2.91176	-4.91558	-1.33828	0	0	-11.3875	-16.8476	-5.75431	0	0
cg06750745	chr4	184181896	-	cg06750745		OpenSea	WWC2	NM_024949	Body	IL6L10F	-1.98176	-3.63754	-0.649144	0.002	0.00727322	-12.2529	-17.825	-7.10423	0	0
cg06750745	chr4	184181896	-	cg06750745		OpenSea	WWC2	NM_024949	Body	IL1raL10F	-2.02547	-3.72022	-0.721632	0	0	-12.4962	-17.5864	-7.28684	0	0
cg06750745	chr4	184181896	-	cg06750745		OpenSea	WWC2	NM_024949	Body	TNFR2L10F	-2.91014	-4.8982	-1.22425	0	0	-11.4875	-16.8766	-6.07515	0	0
cg24521685	chr4	185748534	-	cg24521685	chr4:185746557-185747827	S_Shore	ACSL1;ACSL1	NM_001286711;NM_001995	TSS1500;TSS1500	CRPL10F	-4.30932	-6.94257	-2.03423	0	0	-13.2443	-20.1994	-6.57725	0	0
cg24521685	chr4	185748534	-	cg24521685	chr4:185746557-185747827	S_Shore	ACSL1;ACSL1	NM_001286711;NM_001995	TSS1500;TSS1500	IL6L10F	-2.62059	-4.91105	-0.964333	0	0	-15.2836	-22.1131	-8.55959	0	0
cg24521685	chr4	185748534	-	cg24521685	chr4:185746557-185747827	S_Shore	ACSL1;ACSL1	NM_001286711;NM_001995	TSS1500;TSS1500	IL1raL10F	-2.46097	-4.77172	-0.661153	0	0	-15.4381	-22.6078	-8.44648	0	0
cg24521685	chr4	185748534	-	cg24521685	chr4:185746557-185747827	S_Shore	ACSL1;ACSL1	NM_001286711;NM_001995	TSS1500;TSS1500	TNFR2L10F	-2.62808	-4.73908	-0.856261	0	0	-14.7164	-21.729	-7.76299	0	0
cg12016267	chr22	42147356	+	cg12016267		OpenSea	MEI1	NM_152513	Body	CRPL10F	-3.60837	-6.53713	-1.40378	0.002	0.00727322	-14.4879	-21.7075	-6.59724	0	0
cg12016267	chr22	42147356	+	cg12016267		OpenSea	MEI1	NM_152513	Body	IL6L10F	-2.39143	-4.72476	-0.608545	0.002	0.00727322	-15.6071	-23.3703	-7.95704	0	0
cg17230773	chr7	142494148	+	cg17230773	chr7:142494563-142495248	N_Shore				TNFR2L10F	2.17119	0.593697	4.17256	0.006	0.0191179	9.61653	3.70241	15.4216	0.002	0.00245079
cg14839898	chr11	111956362	-	cg14839898	chr11:111957352-111957681	N_Shore	TIMM8B;SDHD;TIMM8B	NM_012459;NM_003002;NR_028383	Body;TSS1500;Body	CRPL10F	-2.369	-4.25374	-0.889437	0	0	-8.40347	-12.619	-3.72608	0	0
cg14839898	chr11	111956362	-	cg14839898	chr11:111957352-111957681	N_Shore	TIMM8B;SDHD;TIMM8B	NM_012459;NM_003002;NR_028383	Body;TSS1500;Body	IL6L10F	-1.95351	-3.64484	-0.625866	0	0	-9.19126	-13.6997	-4.43281	0	0
cg14839898	chr11	111956362	-	cg14839898	chr11:111957352-111957681	N_Shore	TIMM8B;SDHD;TIMM8B	NM_012459;NM_003002;NR_028383	Body;TSS1500;Body	TNFR2L10F	-2.40393	-4.24815	-0.910406	0	0	-8.51017	-13.1363	-4.1419	0	0
cg04903159	chr6	44202699	-	cg04903159	chr6:44205686-44205931	N_Shelf				CRPL10F	3.18163	1.20052	5.65013	0	0	10.9276	4.2857	17.8056	0	0
cg04903159	chr6	44202699	-	cg04903159	chr6:44205686-44205931	N_Shelf				IL6L10F	1.99143	0.545614	3.78055	0.002	0.00727322	12.1162	5.3855	18.9554	0	0
cg04903159	chr6	44202699	-	cg04903159	chr6:44205686-44205931	N_Shelf				TNFR2L10F	2.93973	1.06537	5.59008	0	0	11.748	4.99199	18.62	0	0
cg06426077	chr4	86728891	-	cg06426077		OpenSea	ARHGAP24;ARHGAP24	NM_001025616;NM_001042669	Body;5'UTR	TNFR2L10F	-1.88742	-3.8688	-0.479572	0.004	0.0134261	-11.7861	-17.8204	-5.28583	0	0
cg23484741	chr5	142936868	-	cg23484741		OpenSea				TNFR2L10F	-2.32437	-4.25429	-0.771355	0.002	0.00727322	-12.5108	-18.5253	-6.42697	0	0
cg03337382	chr10	125960385	+	cg03337382		OpenSea				TNFR2L10F	-1.86441	-3.55607	-0.632959	0.002	0.00727322	-8.94372	-13.7131	-4.03518	0	0
cg10027857	chr17	76595619	+	cg10027857		OpenSea				CRPL10F	-2.22997	-4.4406	-0.494695	0.004	0.0134261	-13.7414	-19.5579	-7.93557	0	0
cg10027857	chr17	76595619	+	cg10027857		OpenSea				TNFR2L10F	-2.28789	-4.30964	-0.736063	0	0	-13.838	-19.7817	-8.00968	0	0
cg07411165	chr4	146761480	-	cg07411165		OpenSea	ZNF827	NM_178835	Body	CRPL10F	-2.0858	-3.80368	-0.717784	0	0	-10.2265	-14.9089	-5.80382	0	0
cg07411165	chr4	146761480	-	cg07411165		OpenSea	ZNF827	NM_178835	Body	IL6L10F	-1.17095	-2.48444	-0.170777	0.012	0.0353974	-11.0934	-15.5442	-6.50966	0	0
cg07411165	chr4	146761480	-	cg07411165		OpenSea	ZNF827	NM_178835	Body	IL1raL10F	-1.49526	-2.90574	-0.432823	0.008	0.0244802	-11.0449	-15.3877	-6.67372	0	0
cg24296397	chr3	49692537	+	cg24296397	chr3:49690022-49690329	S_Shelf	BSN	NM_003458	Body	CRPL10F	4.13371	1.9531	6.74349	0	0	14.1748	6.65869	21.7273	0	0
cg24296397	chr3	49692537	+	cg24296397	chr3:49690022-49690329	S_Shelf	BSN	NM_003458	Body	IL6L10F	3.03342	1.06466	5.43549	0.002	0.00727322	15.3461	7.40225	23.0561	0	0
cg24296397	chr3	49692537	+	cg24296397	chr3:49690022-49690329	S_Shelf	BSN	NM_003458	Body	IL1raL10F	2.68972	0.977189	5.1855	0.006	0.0191179	16.0094	8.40246	23.4496	0	0
cg24296397	chr3	49692537	+	cg24296397	chr3:49690022-49690329	S_Shelf	BSN	NM_003458	Body	TNFR2L10F	3.89438	1.67324	6.65156	0	0	14.7682	6.96045	22.5204	0	0
cg01795822	chr1	10528093	-	cg01795822		OpenSea	DFFA;DFFA	NM_004401;NM_213566	Body;Body	CRPL10F	2.69032	1.23943	4.50936	0	0	9.59585	4.76262	14.3334	0	0
cg01795822	chr1	10528093	-	cg01795822		OpenSea	DFFA;DFFA	NM_004401;NM_213566	Body;Body	IL6L10F	1.36325	0.383193	2.62412	0	0	10.7864	6.1544	15.498	0	0
cg01795822	chr1	10528093	-	cg01795822		OpenSea	DFFA;DFFA	NM_004401;NM_213566	Body;Body	IL1raL10F	1.57448	0.41952	2.98164	0.004	0.0134261	10.92	5.95341	15.9468	0	0
cg01795822	chr1	10528093	-	cg01795822		OpenSea	DFFA;DFFA	NM_004401;NM_213566	Body;Body	TNFR2L10F	2.09663	0.841366	3.62727	0	0	10.346	5.56696	15.1914	0	0
cg01297684	chr12	56069634	+	cg01297684		OpenSea				CRPL10F	-1.59547	-2.54208	-0.79862	0	0	-4.13172	-6.36638	-1.72426	0	0
cg01297684	chr12	56069634	+	cg01297684		OpenSea				IL6L10F	-1.03581	-1.82592	-0.281249	0.002	0.00727322	-4.79373	-6.96295	-2.55151	0	0
cg01297684	chr12	56069634	+	cg01297684		OpenSea				IL1raL10F	-0.772245	-1.48683	-0.207945	0.004	0.0134261	-5.03484	-7.06419	-2.75367	0	0
cg01297684	chr12	56069634	+	cg01297684		OpenSea				TNFR2L10F	-1.16149	-2.00464	-0.492308	0	0	-4.69552	-6.86425	-2.55965	0	0
cg08506528	chr10	4093714	-	cg08506528		OpenSea	LOC101927964	NR_120632	TSS1500	IL6L10F	-1.56809	-2.9861	-0.423877	0	0	-10.9965	-15.982	-5.95138	0.002	0.00245079
cg23635525	chr7	133196253	+	cg23635525		OpenSea	EXOC4	NM_021807	Body	CRPL10F	-2.16675	-3.74562	-1.00649	0	0	-7.8645	-11.567	-4.44354	0	0
cg23635525	chr7	133196253	+	cg23635525		OpenSea	EXOC4	NM_021807	Body	IL6L10F	-1.51847	-2.85687	-0.473248	0.002	0.00727322	-8.68427	-12.4032	-4.71027	0	0
cg23635525	chr7	133196253	+	cg23635525		OpenSea	EXOC4	NM_021807	Body	IL1raL10F	-1.86297	-3.2809	-0.649842	0	0	-8.17259	-11.9381	-4.11012	0	0
cg23635525	chr7	133196253	+	cg23635525		OpenSea	EXOC4	NM_021807	Body	TNFR2L10F	-1.86166	-3.20927	-0.800464	0	0	-8.20871	-12.0571	-4.41169	0	0
cg12644285	chr15	93570953	+	cg12644285		OpenSea	CHD2	NM_001271	3'UTR	CRPL10F	-3.79285	-6.06419	-1.97952	0	0	-9.4326	-14.8376	-4.14844	0	0
cg12644285	chr15	93570953	+	cg12644285		OpenSea	CHD2	NM_001271	3'UTR	IL6L10F	-1.65899	-3.23015	-0.425381	0.002	0.00727322	-11.561	-16.7071	-5.82256	0	0
cg12644285	chr15	93570953	+	cg12644285		OpenSea	CHD2	NM_001271	3'UTR	IL1raL10F	-2.3323	-4.05327	-0.844947	0	0	-10.7422	-16.1695	-5.43494	0	0
cg12644285	chr15	93570953	+	cg12644285		OpenSea	CHD2	NM_001271	3'UTR	TNFR2L10F	-1.8041	-3.55896	-0.590062	0.002	0.00727322	-11.56	-16.946	-6.30363	0	0
cg13178755	chr2	174023580	-	cg13178755		OpenSea	ZAK;ZAK	NM_133646;NM_016653	Body;Body	CRPL10F	-2.0801	-3.44053	-0.899084	0	0	-6.20717	-8.95718	-3.32796	0	0
cg13178755	chr2	174023580	-	cg13178755		OpenSea	ZAK;ZAK	NM_133646;NM_016653	Body;Body	IL1raL10F	-1.13624	-2.10776	-0.390684	0	0	-7.01366	-9.54871	-4.0592	0	0
cg13178755	chr2	174023580	-	cg13178755		OpenSea	ZAK;ZAK	NM_133646;NM_016653	Body;Body	TNFR2L10F	-1.41577	-2.54229	-0.449886	0.004	0.0134261	-6.78344	-9.44442	-4.14279	0	0
cg08663999	chr3	150089701	-	cg08663999		OpenSea				CRPL10F	-2.39317	-4.19962	-0.847872	0.002	0.00727322	-9.39094	-13.8751	-4.57966	0	0
cg08663999	chr3	150089701	-	cg08663999		OpenSea				IL6L10F	-1.63373	-3.01868	-0.532012	0.002	0.00727322	-10.4456	-15.658	-5.58125	0	0
cg08663999	chr3	150089701	-	cg08663999		OpenSea				TNFR2L10F	-2.62367	-4.48618	-1.1251	0	0	-9.37075	-14.3182	-4.49622	0	0
cg05866150	chr14	21317205	-	cg05866150		OpenSea				TNFR2L10F	-1.79511	-3.46189	-0.565662	0.002	0.00727322	-8.06589	-12.854	-3.49436	0.002	0.00245079
cg16961793	chr22	45624479	-	cg16961793		OpenSea	KIAA0930	NM_001009880	Body	CRPL10F	-3.57885	-5.7479	-1.86265	0	0	-7.54565	-12.239	-2.81235	0	0
cg16961793	chr22	45624479	-	cg16961793		OpenSea	KIAA0930	NM_001009880	Body	IL6L10F	-1.92363	-3.57796	-0.659659	0	0	-9.16983	-13.6262	-4.57152	0	0
cg16961793	chr22	45624479	-	cg16961793		OpenSea	KIAA0930	NM_001009880	Body	IL1raL10F	-1.89381	-3.35454	-0.69984	0	0	-9.50498	-13.918	-4.69949	0	0
cg16961793	chr22	45624479	-	cg16961793		OpenSea	KIAA0930	NM_001009880	Body	TNFR2L10F	-2.17177	-3.74802	-0.855849	0	0	-9.05406	-13.8091	-4.69972	0	0
cg20228731	chr7	130646051	+	cg20228731		OpenSea	FLJ43663;FLJ43663	NR_015431;NR_024153	Body;Body	CRPL10F	-1.03521	-1.61919	-0.521792	0	0	-2.30671	-3.84737	-0.92674	0.002	0.00245079
cg20228731	chr7	130646051	+	cg20228731		OpenSea	FLJ43663;FLJ43663	NR_015431;NR_024153	Body;Body	IL6L10F	-0.50976	-0.95499	-0.164555	0	0	-2.86553	-4.46535	-1.3303	0	0
cg20228731	chr7	130646051	+	cg20228731		OpenSea	FLJ43663;FLJ43663	NR_015431;NR_024153	Body;Body	IL1raL10F	-0.572656	-1.09898	-0.222804	0	0	-2.91269	-4.372	-1.42383	0	0
cg20228731	chr7	130646051	+	cg20228731		OpenSea	FLJ43663;FLJ43663	NR_015431;NR_024153	Body;Body	TNFR2L10F	-0.937624	-1.49163	-0.388379	0	0	-2.42965	-3.85173	-0.898513	0.002	0.00245079
cg12839166	chr11	5462320	+	cg12839166		OpenSea	OR51I1;OR51B5;OR51B5	NM_001005288;NR_038321;NM_001005567	1stExon;Body;5'UTR	CRPL10F	1.39145	0.267468	2.80042	0.016	0.0456034	7.12033	2.87153	11.3194	0	0
cg12839166	chr11	5462320	+	cg12839166		OpenSea	OR51I1;OR51B5;OR51B5	NM_001005288;NR_038321;NM_001005567	1stExon;Body;5'UTR	IL6L10F	1.35423	0.395075	2.61598	0.004	0.0134261	7.00186	2.45559	11.3332	0.004	0.00469301
cg12839166	chr11	5462320	+	cg12839166		OpenSea	OR51I1;OR51B5;OR51B5	NM_001005288;NR_038321;NM_001005567	1stExon;Body;5'UTR	IL1raL10F	1.36963	0.342221	2.71189	0.008	0.0244802	7.22584	2.95227	11.7176	0	0
cg12839166	chr11	5462320	+	cg12839166		OpenSea	OR51I1;OR51B5;OR51B5	NM_001005288;NR_038321;NM_001005567	1stExon;Body;5'UTR	TNFR2L10F	2.64864	1.21989	4.3514	0	0	6.0725	1.66218	10.6847	0.008	0.0090217
cg26615736	chr1	45267159	+	cg26615736	chr1:45265534-45266783	S_Shore	PLK3	NM_004073	Body	CRPL10F	-2.80534	-5.13789	-0.828041	0.008	0.0244802	-14.3482	-21.039	-7.72543	0	0
cg26615736	chr1	45267159	+	cg26615736	chr1:45265534-45266783	S_Shore	PLK3	NM_004073	Body	IL1raL10F	-2.13631	-4.27792	-0.539374	0.006	0.0191179	-15.6379	-22.5493	-8.83891	0	0
cg26615736	chr1	45267159	+	cg26615736	chr1:45265534-45266783	S_Shore	PLK3	NM_004073	Body	TNFR2L10F	-2.46131	-4.59842	-0.886355	0	0	-14.6966	-21.2704	-7.78141	0	0
cg18185662	chr11	42275722	+	cg18185662		OpenSea	LOC100507205	NR_038309	TSS1500	CRPL10F	-3.4784	-5.95524	-1.58832	0	0	-11.8318	-17.584	-6.0921	0	0
cg18185662	chr11	42275722	+	cg18185662		OpenSea	LOC100507205	NR_038309	TSS1500	IL6L10F	-1.92999	-3.80503	-0.494887	0.002	0.00727322	-13.1833	-19.1137	-7.06857	0	0
cg19821297	chr19	12890029	-	cg19821297	chr19:12889083-12889343	S_Shore				CRPL10F	-4.23036	-6.60616	-2.06112	0	0	-10.811	-16.3573	-5.38967	0	0
cg19821297	chr19	12890029	-	cg19821297	chr19:12889083-12889343	S_Shore				IL6L10F	-2.28679	-4.10165	-0.658902	0.006	0.0191179	-12.7919	-18.1283	-7.76791	0	0
cg19821297	chr19	12890029	-	cg19821297	chr19:12889083-12889343	S_Shore				IL1raL10F	-2.12677	-3.94339	-0.822254	0.002	0.00727322	-12.6479	-17.396	-7.49789	0	0
cg19821297	chr19	12890029	-	cg19821297	chr19:12889083-12889343	S_Shore				TNFR2L10F	-3.03555	-5.30165	-1.0294	0	0	-12.0049	-17.3423	-6.39891	0	0
cg12955870	chr2	169888032	-	cg12955870		OpenSea	ABCB11	NM_003742	TSS200	CRPL10F	-2.87796	-4.97835	-1.21087	0	0	-9.3372	-15.0339	-3.58422	0.002	0.00245079
cg12955870	chr2	169888032	-	cg12955870		OpenSea	ABCB11	NM_003742	TSS200	IL6L10F	-2.30158	-4.28103	-0.844599	0	0	-9.86338	-15.5429	-4.21303	0.002	0.00245079
cg12955870	chr2	169888032	-	cg12955870		OpenSea	ABCB11	NM_003742	TSS200	TNFR2L10F	-2.88261	-4.87722	-1.23463	0	0	-9.64556	-15.2059	-4.28404	0	0
cg13673960	chr4	1742301	+	cg13673960		OpenSea	TACC3	NM_006342	Body	CRPL10F	2.53591	0.690695	4.70485	0.006	0.0191179	5.91942	-0.188978	12.0257	0.058	0.0604148
cg13673960	chr4	1742301	+	cg13673960		OpenSea	TACC3	NM_006342	Body	IL6L10F	1.6416	0.299468	3.37748	0.004	0.0134261	6.90937	0.71647	12.758	0.032	0.0339208
cg13673960	chr4	1742301	+	cg13673960		OpenSea	TACC3	NM_006342	Body	IL1raL10F	2.37087	0.721402	4.36206	0.002	0.00727322	6.46379	0.292	12.4666	0.038	0.0400609
cg13673960	chr4	1742301	+	cg13673960		OpenSea	TACC3	NM_006342	Body	TNFR2L10F	3.3153	1.30129	5.76377	0	0	5.62851	-0.151013	11.6577	0.064	0.0664852
cg26312071	chr15	90727783	+	cg26312071	chr15:90727879-90728570	N_Shore	SEMA4B	NM_020210	TSS1500	CRPL10F	-3.33492	-5.54134	-1.55809	0	0	-9.36601	-14.5331	-4.30001	0.002	0.00245079
cg26312071	chr15	90727783	+	cg26312071	chr15:90727879-90728570	N_Shore	SEMA4B	NM_020210	TSS1500	IL6L10F	-1.87831	-3.52575	-0.564986	0	0	-11.0549	-16.1267	-5.71666	0	0
cg26312071	chr15	90727783	+	cg26312071	chr15:90727879-90728570	N_Shore	SEMA4B	NM_020210	TSS1500	IL1raL10F	-1.96342	-3.70116	-0.657486	0	0	-11.9977	-17.62	-6.7274	0	0
cg26312071	chr15	90727783	+	cg26312071	chr15:90727879-90728570	N_Shore	SEMA4B	NM_020210	TSS1500	TNFR2L10F	-2.85276	-4.89208	-1.23626	0	0	-10.0766	-15.3828	-4.68747	0	0
cg15033511	chr17	54994023	+	cg15033511	chr17:54990832-54991771	S_Shelf				CRPL10F	-4.68575	-7.67177	-2.04214	0	0	-16.8325	-23.8136	-10.0044	0	0
cg15033511	chr17	54994023	+	cg15033511	chr17:54990832-54991771	S_Shelf				IL6L10F	-2.5414	-4.89782	-0.755837	0	0	-19.4697	-26.4069	-12.5844	0	0
cg15033511	chr17	54994023	+	cg15033511	chr17:54990832-54991771	S_Shelf				IL1raL10F	-2.16451	-4.40206	-0.464799	0.006	0.0191179	-19.7769	-26.9115	-12.66	0	0
cg15033511	chr17	54994023	+	cg15033511	chr17:54990832-54991771	S_Shelf				TNFR2L10F	-2.99883	-5.49386	-1.14455	0	0	-18.5369	-25.1851	-11.584	0	0
cg12800932	chr7	158611626	+	cg12800932		OpenSea	ESYT2	NM_020728	Body	CRPL10F	-1.1944	-2.01816	-0.533013	0	0	-3.94219	-6.19598	-1.87244	0	0
cg12800932	chr7	158611626	+	cg12800932		OpenSea	ESYT2	NM_020728	Body	IL6L10F	-0.920339	-1.64669	-0.285682	0.002	0.00727322	-4.22878	-6.30454	-2.11486	0	0
cg12800932	chr7	158611626	+	cg12800932		OpenSea	ESYT2	NM_020728	Body	TNFR2L10F	-1.37758	-2.38586	-0.521249	0	0	-3.74011	-5.89923	-1.52369	0	0
cg16531578	chr6	42370098	-	cg16531578		OpenSea	TRERF1;TRERF1	NM_033502;NM_001297573	5'UTR;5'UTR	CRPL10F	-1.67804	-2.65235	-0.795945	0	0	-3.80842	-5.89778	-1.80772	0.002	0.00245079
cg16531578	chr6	42370098	-	cg16531578		OpenSea	TRERF1;TRERF1	NM_033502;NM_001297573	5'UTR;5'UTR	IL6L10F	-1.01119	-1.90013	-0.224499	0.006	0.0191179	-4.4613	-6.59572	-2.40582	0	0
cg16531578	chr6	42370098	-	cg16531578		OpenSea	TRERF1;TRERF1	NM_033502;NM_001297573	5'UTR;5'UTR	IL1raL10F	-0.906729	-1.65772	-0.317393	0	0	-4.51271	-6.47308	-2.51571	0	0
cg16531578	chr6	42370098	-	cg16531578		OpenSea	TRERF1;TRERF1	NM_033502;NM_001297573	5'UTR;5'UTR	TNFR2L10F	-1.20968	-2.03605	-0.447484	0	0	-4.23314	-6.25599	-2.1582	0	0
cg09304470	chr18	76916901	-	cg09304470		OpenSea	ATP9B;ATP9B	NM_198531;NM_001306085	Body;Body	CRPL10F	-1.84178	-3.07394	-0.838962	0	0	-6.10297	-9.36446	-2.76887	0.002	0.00245079
cg09304470	chr18	76916901	-	cg09304470		OpenSea	ATP9B;ATP9B	NM_198531;NM_001306085	Body;Body	IL6L10F	-1.38193	-2.51054	-0.465117	0	0	-6.44179	-9.70266	-2.92266	0	0
cg09304470	chr18	76916901	-	cg09304470		OpenSea	ATP9B;ATP9B	NM_198531;NM_001306085	Body;Body	TNFR2L10F	-1.84795	-3.11896	-0.776993	0	0	-6.17243	-9.62196	-2.51935	0	0
cg01177100	chr3	9176211	-	cg01177100	chr3:9177691-9178189	N_Shore	SRGAP3;SRGAP3	NM_001033117;NM_014850	Body;Body	CRPL10F	5.22668	2.42089	9.00639	0	0	13.8679	5.10456	21.9492	0.002	0.00245079
cg01177100	chr3	9176211	-	cg01177100	chr3:9177691-9178189	N_Shore	SRGAP3;SRGAP3	NM_001033117;NM_014850	Body;Body	IL6L10F	3.43357	1.23479	6.26544	0	0	14.8108	6.52831	23.3473	0.002	0.00245079
cg01177100	chr3	9176211	-	cg01177100	chr3:9177691-9178189	N_Shore	SRGAP3;SRGAP3	NM_001033117;NM_014850	Body;Body	IL1raL10F	2.81823	0.720829	5.51677	0.004	0.0134261	15.3334	7.31823	23.1642	0	0
cg01177100	chr3	9176211	-	cg01177100	chr3:9177691-9178189	N_Shore	SRGAP3;SRGAP3	NM_001033117;NM_014850	Body;Body	TNFR2L10F	4.76203	1.95469	7.9123	0	0	13.7954	5.20301	22.1922	0.002	0.00245079
cg11993828	chr4	38525620	+	cg11993828		OpenSea	LINC01258	NR_110951	TSS1500	CRPL10F	-1.59979	-2.8367	-0.693402	0	0	-6.75477	-9.69279	-3.76774	0	0
cg11993828	chr4	38525620	+	cg11993828		OpenSea	LINC01258	NR_110951	TSS1500	IL6L10F	-1.3073	-2.33772	-0.417451	0.002	0.00727322	-7.36188	-10.5788	-4.26406	0	0
cg11993828	chr4	38525620	+	cg11993828		OpenSea	LINC01258	NR_110951	TSS1500	IL1raL10F	-0.927281	-1.8075	-0.163666	0.016	0.0456034	-7.59964	-10.6303	-4.47298	0	0
cg11993828	chr4	38525620	+	cg11993828		OpenSea	LINC01258	NR_110951	TSS1500	TNFR2L10F	-1.6085	-2.71938	-0.677545	0	0	-6.8389	-10.0507	-3.61547	0	0
cg18789123	chr2	29174857	-	cg18789123		OpenSea				IL6L10F	-1.22762	-2.31822	-0.347618	0.004	0.0134261	-7.77478	-11.327	-4.06098	0	0
cg18789123	chr2	29174857	-	cg18789123		OpenSea				IL1raL10F	-1.4771	-2.62025	-0.466887	0	0	-7.28067	-11.0394	-3.49258	0	0
cg18789123	chr2	29174857	-	cg18789123		OpenSea				TNFR2L10F	-1.62238	-2.86292	-0.65951	0	0	-7.2293	-10.6572	-3.5629	0	0
cg16218494	chr11	34426751	+	cg16218494		OpenSea				IL6L10F	-1.15179	-2.15299	-0.363547	0	0	-6.59403	-9.95532	-3.44183	0	0
cg16218494	chr11	34426751	+	cg16218494		OpenSea				TNFR2L10F	-1.90569	-3.3812	-0.832573	0.002	0.00727322	-5.78926	-9.15475	-2.1447	0	0
cg18850465	chr16	50718807	-	cg18850465		OpenSea				CRPL10F	-4.47027	-7.69203	-1.79155	0.002	0.00727322	-16.7879	-26.272	-7.5783	0	0
cg18850465	chr16	50718807	-	cg18850465		OpenSea				IL6L10F	-2.41337	-5.08886	-0.597401	0.004	0.0134261	-19.6077	-29.3202	-10.3683	0	0
cg18850465	chr16	50718807	-	cg18850465		OpenSea				IL1raL10F	-2.53862	-5.23824	-0.335596	0.016	0.0456034	-19.9471	-29.4763	-10.4113	0	0
cg18850465	chr16	50718807	-	cg18850465		OpenSea				TNFR2L10F	-2.94281	-6.16918	-0.553379	0.012	0.0353974	-18.7675	-28.4311	-9.71132	0	0
cg10867751	chr1	25870981	-	cg10867751	chr1:25869893-25871042	Island	LDLRAP1	NM_015627	Body	CRPL10F	3.72318	0.477333	7.3342	0.014	0.0406753	17.2827	7.00146	27.573	0.002	0.00245079
cg10867751	chr1	25870981	-	cg10867751	chr1:25869893-25871042	Island	LDLRAP1	NM_015627	Body	IL6L10F	2.97346	0.582219	6.20045	0.016	0.0456034	17.5126	6.60869	28.1275	0.002	0.00245079
cg14712766	chr15	39636986	+	cg14712766		OpenSea				CRPL10F	-1.69883	-2.88338	-0.701071	0	0	-4.07653	-7.47489	-0.545446	0.024	0.0256824
cg14712766	chr15	39636986	+	cg14712766		OpenSea				IL6L10F	-1.02304	-2.0539	-0.257697	0.002	0.00727322	-5.00954	-8.36717	-1.57712	0.004	0.00469301
cg14712766	chr15	39636986	+	cg14712766		OpenSea				IL1raL10F	-1.17585	-2.3102	-0.306164	0	0	-4.84555	-7.99885	-1.60677	0.004	0.00469301
cg14712766	chr15	39636986	+	cg14712766		OpenSea				TNFR2L10F	-2.01626	-3.27759	-0.962448	0	0	-4.03134	-7.6268	-0.75426	0.018	0.0195012
cg18170385	chr10	330411	+	cg18170385		OpenSea	DIP2C	NM_014974	Body	CRPL10F	-3.20098	-5.50238	-1.47467	0	0	-12.0639	-17.6928	-6.51442	0	0
cg18170385	chr10	330411	+	cg18170385		OpenSea	DIP2C	NM_014974	Body	IL6L10F	-2.26399	-4.37397	-0.741341	0	0	-13.0155	-19.0764	-6.95366	0	0
cg18170385	chr10	330411	+	cg18170385		OpenSea	DIP2C	NM_014974	Body	TNFR2L10F	-2.27368	-4.21204	-0.801105	0	0	-13.0945	-18.7122	-6.79557	0	0
cg17774776	chr5	6638536	+	cg17774776		OpenSea	SRD5A1	NM_001047	Body	TNFR2L10F	-1.24601	-2.39021	-0.376454	0.004	0.0134261	-4.59622	-7.86959	-1.39885	0.004	0.00469301
cg05333174	chr22	43163057	+	cg05333174	chr22:43165947-43166287	N_Shelf				CRPL10F	1.53049	0.569616	2.7049	0	0	3.60971	0.280581	6.9944	0.03	0.0318757
cg05333174	chr22	43163057	+	cg05333174	chr22:43165947-43166287	N_Shelf				IL6L10F	0.889718	0.213095	1.80619	0.012	0.0353974	4.25875	0.963451	7.61461	0.01	0.0111331
cg05333174	chr22	43163057	+	cg05333174	chr22:43165947-43166287	N_Shelf				TNFR2L10F	1.51175	0.592744	2.72224	0	0	3.90282	0.80899	7.24311	0.02	0.0215556
cg14887853	chr6	139794538	-	cg14887853		OpenSea	LOC645434	NR_033919	Body	CRPL10F	-1.99821	-3.11142	-1.05925	0	0	-4.80275	-7.54862	-2.26806	0	0
cg14887853	chr6	139794538	-	cg14887853		OpenSea	LOC645434	NR_033919	Body	IL6L10F	-1.25394	-2.24069	-0.388896	0.002	0.00727322	-5.61737	-8.23006	-3.05581	0	0
cg14887853	chr6	139794538	-	cg14887853		OpenSea	LOC645434	NR_033919	Body	IL1raL10F	-0.958473	-1.75258	-0.330186	0.002	0.00727322	-5.95286	-8.66696	-3.45623	0	0
cg14887853	chr6	139794538	-	cg14887853		OpenSea	LOC645434	NR_033919	Body	TNFR2L10F	-1.47146	-2.49004	-0.569357	0	0	-5.38333	-8.10845	-2.69624	0	0
cg04621850	chr9	140067121	+	cg04621850	chr9:140068792-140069082	N_Shore	TMEM210	NM_001282477	TSS1500	CRPL10F	1.97314	0.453053	3.81334	0.004	0.0134261	8.12808	3.09537	13.3196	0	0
cg04621850	chr9	140067121	+	cg04621850	chr9:140068792-140069082	N_Shore	TMEM210	NM_001282477	TSS1500	IL6L10F	1.28834	0.199698	2.77564	0.014	0.0406753	8.5672	3.0899	14.0259	0.002	0.00245079
cg04621850	chr9	140067121	+	cg04621850	chr9:140068792-140069082	N_Shore	TMEM210	NM_001282477	TSS1500	IL1raL10F	1.66698	0.321759	3.39529	0.012	0.0353974	9.41339	4.10535	15.1383	0	0
cg04621850	chr9	140067121	+	cg04621850	chr9:140068792-140069082	N_Shore	TMEM210	NM_001282477	TSS1500	TNFR2L10F	2.62407	1.13508	4.39216	0	0	7.78355	2.31666	13.0163	0.004	0.00469301
cg14185504	chr6	110094128	+	cg14185504		OpenSea	FIG4	NM_014845	Body	IL6L10F	-2.1749	-4.44635	-0.456087	0.008	0.0244802	-15.2782	-23.233	-7.18931	0	0
cg14185504	chr6	110094128	+	cg14185504		OpenSea	FIG4	NM_014845	Body	IL1raL10F	-2.57979	-5.11843	-0.651855	0.004	0.0134261	-14.2022	-22.0364	-6.51899	0	0
cg16384774	chr14	89626932	-	cg16384774	chr14:89628885-89629199	N_Shore	FOXN3;FOXN3	NM_005197;NM_001085471	3'UTR;3'UTR	CRPL10F	-2.57169	-4.68037	-1.04388	0	0	-9.62811	-15.195	-4.50525	0	0
cg16384774	chr14	89626932	-	cg16384774	chr14:89628885-89629199	N_Shore	FOXN3;FOXN3	NM_005197;NM_001085471	3'UTR;3'UTR	IL6L10F	-1.9136	-3.58035	-0.625229	0	0	-10.4077	-15.8833	-4.77902	0	0
cg16384774	chr14	89626932	-	cg16384774	chr14:89628885-89629199	N_Shore	FOXN3;FOXN3	NM_005197;NM_001085471	3'UTR;3'UTR	TNFR2L10F	-2.85244	-5.0139	-1.2582	0	0	-9.20704	-14.8927	-3.7261	0.002	0.00245079
cg26089920	chr18	22494802	+	cg26089920		OpenSea				CRPL10F	-6.36801	-10.6383	-2.94066	0	0	-17.9609	-28.4401	-7.38669	0	0
cg26089920	chr18	22494802	+	cg26089920		OpenSea				IL6L10F	-4.64492	-8.2547	-1.47259	0	0	-19.6524	-29.8338	-9.12669	0.002	0.00245079
cg26089920	chr18	22494802	+	cg26089920		OpenSea				TNFR2L10F	-3.92939	-7.22653	-1.33897	0	0	-20.4396	-30.4344	-9.94826	0	0
cg11104177	chr10	123605117	-	cg11104177		OpenSea	ATE1;ATE1;ATE1;ATE1;ATE1;ATE1	NR_110006;NM_001288734;NM_001288735;NM_007041;NM_001001976;NM_001288736	Body;Body;Body;Body;Body;Body	CRPL10F	-1.86919	-2.99964	-0.957957	0	0	-4.89338	-7.61349	-2.05064	0	0
cg11104177	chr10	123605117	-	cg11104177		OpenSea	ATE1;ATE1;ATE1;ATE1;ATE1;ATE1	NR_110006;NM_001288734;NM_001288735;NM_007041;NM_001001976;NM_001288736	Body;Body;Body;Body;Body;Body	IL6L10F	-1.02571	-1.92825	-0.353648	0.002	0.00727322	-5.68535	-8.37464	-3.15862	0	0
cg11104177	chr10	123605117	-	cg11104177		OpenSea	ATE1;ATE1;ATE1;ATE1;ATE1;ATE1	NR_110006;NM_001288734;NM_001288735;NM_007041;NM_001001976;NM_001288736	Body;Body;Body;Body;Body;Body	IL1raL10F	-0.857686	-1.67738	-0.251033	0.004	0.0134261	-5.90453	-8.61044	-3.2102	0	0
cg11104177	chr10	123605117	-	cg11104177		OpenSea	ATE1;ATE1;ATE1;ATE1;ATE1;ATE1	NR_110006;NM_001288734;NM_001288735;NM_007041;NM_001001976;NM_001288736	Body;Body;Body;Body;Body;Body	TNFR2L10F	-1.58308	-2.71573	-0.655171	0	0	-5.32997	-7.98922	-2.53749	0.004	0.00469301
cg19136485	chr14	106385381	-	cg19136485		OpenSea	KIAA0125	NR_026800	Body	CRPL10F	1.49996	0.230574	3.01564	0.006	0.0191179	8.10041	3.90225	12.2031	0	0
cg19136485	chr14	106385381	-	cg19136485		OpenSea	KIAA0125	NR_026800	Body	TNFR2L10F	2.06385	0.715167	3.78839	0	0	7.88658	3.53003	12.2746	0	0
cg24331727	chr11	16213327	-	cg24331727		OpenSea	SOX6;SOX6;SOX6;SOX6	NM_001145811;NM_033326;NM_017508;NM_001145819	Body;Body;Body;Body	CRPL10F	2.72266	0.366708	5.65688	0.014	0.0406753	7.7007	-0.0650766	15.5926	0.056	0.0583991
cg24331727	chr11	16213327	-	cg24331727		OpenSea	SOX6;SOX6;SOX6;SOX6	NM_001145811;NM_033326;NM_017508;NM_001145819	Body;Body;Body;Body	IL6L10F	2.67394	0.864274	4.90284	0	0	7.72897	-0.124451	15.9532	0.054	0.0563569
cg24331727	chr11	16213327	-	cg24331727		OpenSea	SOX6;SOX6;SOX6;SOX6	NM_001145811;NM_033326;NM_017508;NM_001145819	Body;Body;Body;Body	TNFR2L10F	5.63131	2.69857	8.88298	0	0	4.69869	-3.97134	12.4601	0.26	0.262821
cg25746149	chr11	117280371	+	cg25746149		OpenSea	CEP164;CEP164	NM_001271933;NM_014956	Body;Body	CRPL10F	-1.80271	-3.21311	-0.748113	0	0	-5.4906	-9.00302	-1.81062	0.002	0.00245079
cg25746149	chr11	117280371	+	cg25746149		OpenSea	CEP164;CEP164	NM_001271933;NM_014956	Body;Body	IL6L10F	-1.07698	-2.10795	-0.315649	0.002	0.00727322	-6.55239	-10.0319	-3.12314	0	0
cg25746149	chr11	117280371	+	cg25746149		OpenSea	CEP164;CEP164	NM_001271933;NM_014956	Body;Body	TNFR2L10F	-1.59334	-2.92716	-0.597439	0	0	-5.96412	-9.53163	-2.323	0.002	0.00245079
cg12847371	chr19	13056058	-	cg12847371	chr19:13056458-13057125	N_Shore	RAD23A;RAD23A;RAD23A;RAD23A	NM_001270363;NM_001270362;NM_005053;NR_072976	TSS1500;TSS1500;TSS1500;TSS1500	CRPL10F	-2.70625	-4.41422	-1.32281	0	0	-8.09986	-12.9361	-3.38176	0	0
cg12847371	chr19	13056058	-	cg12847371	chr19:13056458-13057125	N_Shore	RAD23A;RAD23A;RAD23A;RAD23A	NM_001270363;NM_001270362;NM_005053;NR_072976	TSS1500;TSS1500;TSS1500;TSS1500	IL6L10F	-1.66821	-3.07159	-0.583609	0.002	0.00727322	-9.10439	-13.4196	-4.2629	0	0
cg12847371	chr19	13056058	-	cg12847371	chr19:13056458-13057125	N_Shore	RAD23A;RAD23A;RAD23A;RAD23A	NM_001270363;NM_001270362;NM_005053;NR_072976	TSS1500;TSS1500;TSS1500;TSS1500	IL1raL10F	-2.03644	-3.50321	-0.836943	0	0	-9.31388	-13.6827	-4.70046	0	0
cg12847371	chr19	13056058	-	cg12847371	chr19:13056458-13057125	N_Shore	RAD23A;RAD23A;RAD23A;RAD23A	NM_001270363;NM_001270362;NM_005053;NR_072976	TSS1500;TSS1500;TSS1500;TSS1500	TNFR2L10F	-2.21875	-3.79834	-0.906223	0	0	-8.91143	-13.3279	-4.329	0	0
cg15341132	chr15	91499023	-	cg15341132	chr15:91497994-91498615	S_Shore	RCCD1;RCCD1;RCCD1	NM_033544;NM_001017919;NM_033544	5'UTR;5'UTR;ExonBnd	CRPL10F	-2.64325	-4.94451	-0.704641	0.006	0.0191179	-12.8595	-19.2162	-6.01061	0	0
cg15341132	chr15	91499023	-	cg15341132	chr15:91497994-91498615	S_Shore	RCCD1;RCCD1;RCCD1	NM_033544;NM_001017919;NM_033544	5'UTR;5'UTR;ExonBnd	IL6L10F	-1.9023	-3.69596	-0.571594	0.002	0.00727322	-13.7364	-20.3309	-7.64102	0	0
cg15341132	chr15	91499023	-	cg15341132	chr15:91497994-91498615	S_Shore	RCCD1;RCCD1;RCCD1	NM_033544;NM_001017919;NM_033544	5'UTR;5'UTR;ExonBnd	IL1raL10F	-2.14408	-4.15701	-0.514628	0.01	0.0301226	-13.8672	-20.8952	-7.21626	0	0
cg15341132	chr15	91499023	-	cg15341132	chr15:91497994-91498615	S_Shore	RCCD1;RCCD1;RCCD1	NM_033544;NM_001017919;NM_033544	5'UTR;5'UTR;ExonBnd	TNFR2L10F	-2.99954	-5.38253	-1.18216	0	0	-12.839	-19.5413	-6.364	0	0
cg03768345	chr14	103027280	+	cg03768345		OpenSea				IL6L10F	2.40765	0.847449	4.68954	0	0	13.4518	6.19245	21.4147	0	0
cg03768345	chr14	103027280	+	cg03768345		OpenSea				TNFR2L10F	3.31889	1.39718	5.86833	0	0	12.4364	5.22202	19.9	0	0
cg12242258	chr21	35884230	-	cg12242258		OpenSea	KCNE1;KCNE1;KCNE1;KCNE1	NM_001270403;NM_001270404;NM_001270402;NM_000219	TSS1500;TSS1500;TSS1500;5'UTR	CRPL10F	-2.8663	-5.04398	-1.00385	0.002	0.00727322	-8.98046	-15.0192	-2.51969	0.002	0.00245079
cg12242258	chr21	35884230	-	cg12242258		OpenSea	KCNE1;KCNE1;KCNE1;KCNE1	NM_001270403;NM_001270404;NM_001270402;NM_000219	TSS1500;TSS1500;TSS1500;5'UTR	IL6L10F	-2.13308	-4.15673	-0.624898	0	0	-9.71375	-16.1695	-3.5397	0.004	0.00469301
cg12242258	chr21	35884230	-	cg12242258		OpenSea	KCNE1;KCNE1;KCNE1;KCNE1	NM_001270403;NM_001270404;NM_001270402;NM_000219	TSS1500;TSS1500;TSS1500;5'UTR	TNFR2L10F	-2.36253	-4.35858	-0.796645	0.004	0.0134261	-9.90552	-15.9597	-3.78023	0	0
cg21186405	chr2	103335661	+	cg21186405		OpenSea	MFSD9	NM_032718	Body	CRPL10F	-2.29748	-3.77965	-1.12887	0	0	-6.12777	-9.85698	-2.3106	0	0
cg21186405	chr2	103335661	+	cg21186405		OpenSea	MFSD9	NM_032718	Body	IL6L10F	-1.07079	-2.03121	-0.269159	0	0	-7.71008	-11.4781	-3.94637	0	0
cg21186405	chr2	103335661	+	cg21186405		OpenSea	MFSD9	NM_032718	Body	IL1raL10F	-1.14524	-2.24915	-0.250705	0.004	0.0134261	-7.32723	-11.131	-3.4403	0	0
cg21186405	chr2	103335661	+	cg21186405		OpenSea	MFSD9	NM_032718	Body	TNFR2L10F	-1.79895	-3.12782	-0.704714	0	0	-6.93946	-10.5444	-3.49518	0	0
cg19198358	chr8	1725179	+	cg19198358		OpenSea	CLN8	NM_018941	Body	CRPL10F	-5.96623	-9.78229	-2.94398	0	0	-14.7733	-24.4577	-4.75604	0.002	0.00245079
cg19198358	chr8	1725179	+	cg19198358		OpenSea	CLN8	NM_018941	Body	IL6L10F	-4.60896	-8.16299	-1.65757	0	0	-16.4524	-25.9402	-6.93305	0	0
cg19198358	chr8	1725179	+	cg19198358		OpenSea	CLN8	NM_018941	Body	TNFR2L10F	-4.07384	-7.11569	-1.69654	0	0	-16.4215	-25.7181	-6.32592	0	0
cg21069139	chr1	115091976	+	cg21069139		OpenSea				CRPL10F	-3.82923	-6.21816	-1.78387	0	0	-7.90446	-13.1671	-2.14576	0.004	0.00469301
cg21069139	chr1	115091976	+	cg21069139		OpenSea				IL6L10F	-2.24792	-4.07067	-0.778059	0.002	0.00727322	-9.47937	-15.3739	-3.35433	0	0
cg21069139	chr1	115091976	+	cg21069139		OpenSea				IL1raL10F	-2.08872	-4.14396	-0.600285	0	0	-9.97134	-15.286	-4.18689	0	0
cg21069139	chr1	115091976	+	cg21069139		OpenSea				TNFR2L10F	-2.77865	-4.98776	-1.21196	0	0	-9.14889	-14.6846	-3.60934	0.002	0.00245079
cg04364800	chr3	160653423	+	cg04364800		OpenSea	PPM1L	NM_139245	Body	CRPL10F	-3.90328	-6.76169	-1.54256	0	0	-12.5195	-19.7298	-5.02692	0.002	0.00245079
cg04364800	chr3	160653423	+	cg04364800		OpenSea	PPM1L	NM_139245	Body	IL6L10F	-2.00066	-4.17197	-0.433095	0.008	0.0244802	-14.5536	-22.4018	-6.77746	0	0
cg04364800	chr3	160653423	+	cg04364800		OpenSea	PPM1L	NM_139245	Body	IL1raL10F	-3.99447	-6.88848	-1.66728	0	0	-12.2068	-20.3981	-4.60352	0.002	0.00245079
cg02158894	chr19	17976717	-	cg02158894		OpenSea				CRPL10F	-3.65846	-5.94739	-1.60954	0	0	-13.8175	-19.6836	-7.1192	0	0
cg02158894	chr19	17976717	-	cg02158894		OpenSea				IL6L10F	-2.27226	-4.26543	-0.653636	0	0	-15.573	-21.9402	-9.64219	0	0
cg02158894	chr19	17976717	-	cg02158894		OpenSea				IL1raL10F	-1.9004	-3.80854	-0.483795	0.008	0.0244802	-15.418	-21.1834	-9.36393	0	0
cg02158894	chr19	17976717	-	cg02158894		OpenSea				TNFR2L10F	-3.22649	-5.5333	-1.2398	0	0	-14.2628	-21.0955	-7.38853	0	0
cg08917665	chr12	9861036	-	cg08917665		OpenSea				IL1raL10F	-1.61489	-3.16302	-0.350103	0.006	0.0191179	-7.13744	-12.4371	-2.02407	0.004	0.00469301
cg08917665	chr12	9861036	-	cg08917665		OpenSea				TNFR2L10F	-1.96828	-3.6687	-0.580691	0.002	0.00727322	-7.12513	-12.2923	-2.24779	0.006	0.00684628
cg16419027	chr13	76033339	-	cg16419027		OpenSea	TBC1D4;TBC1D4;TBC1D4	NM_014832;NM_001286658;NM_001286659	Body;Body;Body	CRPL10F	-2.98998	-5.01736	-1.23161	0	0	-13.5317	-19.4389	-7.5785	0	0
cg16419027	chr13	76033339	-	cg16419027		OpenSea	TBC1D4;TBC1D4;TBC1D4	NM_014832;NM_001286658;NM_001286659	Body;Body;Body	IL6L10F	-2.4098	-4.55818	-0.946214	0	0	-14.1993	-20.0662	-8.63563	0	0
cg16419027	chr13	76033339	-	cg16419027		OpenSea	TBC1D4;TBC1D4;TBC1D4	NM_014832;NM_001286658;NM_001286659	Body;Body;Body	TNFR2L10F	-2.50182	-4.6131	-0.870022	0.002	0.00727322	-13.9223	-19.7552	-7.85868	0	0
cg00789528	chr20	42543034	+	cg00789528	chr20:42543097-42545137	N_Shore	TOX2	NM_001098797	TSS1500	CRPL10F	1.94613	0.474332	3.68251	0.012	0.0353974	5.91995	0.56574	11.1943	0.026	0.0277676
cg00789528	chr20	42543034	+	cg00789528	chr20:42543097-42545137	N_Shore	TOX2	NM_001098797	TSS1500	IL6L10F	1.43633	0.316494	2.9313	0.006	0.0191179	6.56872	1.23403	11.5864	0.014	0.0153212
cg00789528	chr20	42543034	+	cg00789528	chr20:42543097-42545137	N_Shore	TOX2	NM_001098797	TSS1500	TNFR2L10F	1.64636	0.234701	3.35507	0.012	0.0353974	6.40653	1.36354	11.3972	0.008	0.0090217
cg25839023	chr3	22414349	+	cg25839023	chr3:22413492-22414365	Island				CRPL10F	2.23843	0.708965	4.25504	0	0	8.65777	3.94405	13.8854	0	0
cg17098449	chr22	31364349	-	cg17098449	chr22:31364564-31365575	N_Shore	TUG1;MORC2	NR_002323;NM_014941	TSS1500;TSS200	CRPL10F	-2.6366	-5.04363	-0.688928	0	0	-13.959	-20.4425	-7.75687	0	0
cg04897299	chr6	21402890	-	cg04897299		OpenSea				CRPL10F	-1.71762	-3.22187	-0.506994	0.004	0.0134261	-8.95445	-13.05	-4.8353	0	0
cg04897299	chr6	21402890	-	cg04897299		OpenSea				IL6L10F	-1.4677	-2.70326	-0.510223	0	0	-9.16172	-13.2006	-5.02946	0	0
cg04897299	chr6	21402890	-	cg04897299		OpenSea				IL1raL10F	-1.3621	-2.60333	-0.339074	0.008	0.0244802	-9.74907	-14.239	-5.38272	0	0
cg04897299	chr6	21402890	-	cg04897299		OpenSea				TNFR2L10F	-1.97617	-3.55135	-0.791123	0	0	-8.71472	-12.8847	-4.63373	0	0
cg02590484	chr17	38178658	-	cg02590484		OpenSea	MED24;MED24;MED24;MED24;MED24;MED24;MED24;MED24	NM_014815;NM_001267797;NM_001079518;NR_052017;NR_052017;NM_014815;NM_001267797;NM_001079518	ExonBnd;ExonBnd;ExonBnd;ExonBnd;Body;Body;Body;Body	CRPL10F	2.16881	1.01368	3.55811	0	0	7.08318	3.43869	10.7222	0	0
cg02590484	chr17	38178658	-	cg02590484		OpenSea	MED24;MED24;MED24;MED24;MED24;MED24;MED24;MED24	NM_014815;NM_001267797;NM_001079518;NR_052017;NR_052017;NM_014815;NM_001267797;NM_001079518	ExonBnd;ExonBnd;ExonBnd;ExonBnd;Body;Body;Body;Body	IL6L10F	1.1269	0.358188	2.18667	0	0	7.89191	4.18894	11.8284	0	0
cg02590484	chr17	38178658	-	cg02590484		OpenSea	MED24;MED24;MED24;MED24;MED24;MED24;MED24;MED24	NM_014815;NM_001267797;NM_001079518;NR_052017;NR_052017;NM_014815;NM_001267797;NM_001079518	ExonBnd;ExonBnd;ExonBnd;ExonBnd;Body;Body;Body;Body	IL1raL10F	1.3879	0.436909	2.61317	0.002	0.00727322	7.67303	3.70716	11.5226	0	0
cg02590484	chr17	38178658	-	cg02590484		OpenSea	MED24;MED24;MED24;MED24;MED24;MED24;MED24;MED24	NM_014815;NM_001267797;NM_001079518;NR_052017;NR_052017;NM_014815;NM_001267797;NM_001079518	ExonBnd;ExonBnd;ExonBnd;ExonBnd;Body;Body;Body;Body	TNFR2L10F	2.18356	0.899752	3.69737	0	0	7.23614	3.3613	11.0321	0	0
cg24835232	chr6	24165957	-	cg24835232		OpenSea				IL6L10F	-1.80494	-4.01605	-0.255228	0.014	0.0406753	-20.0836	-27.3542	-12.8924	0	0
cg26256135	chr10	14608422	+	cg26256135		OpenSea	FAM107B;FAM107B;FAM107B;FAM107B;FAM107B;FAM107B;FAM107B;FAM107B;FAM107B;FAM107B	NM_001282701;NM_001282698;NM_001282702;NM_001282699;NM_001282703;NM_001282700;NM_001282697;NM_001282696;NM_031453;NM_001282695	5'UTR;5'UTR;5'UTR;5'UTR;5'UTR;5'UTR;5'UTR;5'UTR;Body;5'UTR	CRPL10F	-2.48551	-4.49772	-0.93498	0	0	-8.29654	-13.1223	-3.39546	0	0
cg26256135	chr10	14608422	+	cg26256135		OpenSea	FAM107B;FAM107B;FAM107B;FAM107B;FAM107B;FAM107B;FAM107B;FAM107B;FAM107B;FAM107B	NM_001282701;NM_001282698;NM_001282702;NM_001282699;NM_001282703;NM_001282700;NM_001282697;NM_001282696;NM_031453;NM_001282695	5'UTR;5'UTR;5'UTR;5'UTR;5'UTR;5'UTR;5'UTR;5'UTR;Body;5'UTR	IL6L10F	-1.7178	-3.18677	-0.473649	0	0	-9.04057	-13.9605	-4.08555	0	0
cg26256135	chr10	14608422	+	cg26256135		OpenSea	FAM107B;FAM107B;FAM107B;FAM107B;FAM107B;FAM107B;FAM107B;FAM107B;FAM107B;FAM107B	NM_001282701;NM_001282698;NM_001282702;NM_001282699;NM_001282703;NM_001282700;NM_001282697;NM_001282696;NM_031453;NM_001282695	5'UTR;5'UTR;5'UTR;5'UTR;5'UTR;5'UTR;5'UTR;5'UTR;Body;5'UTR	TNFR2L10F	-2.5063	-4.24742	-1.03339	0	0	-8.37399	-13.5888	-3.27256	0	0
cg00533827	chr2	86163827	+	cg00533827		OpenSea				IL6L10F	-1.55815	-3.39699	-0.312789	0.012	0.0353974	-7.47929	-13.9264	-0.295944	0.042	0.0440543
cg13990362	chr4	117474275	-	cg13990362		OpenSea				CRPL10F	-2.55241	-5.06826	-0.602939	0.01	0.0301226	-13.7605	-20.0663	-6.75506	0	0
cg18765405	chr5	134644263	-	cg18765405		OpenSea				CRPL10F	-2.20451	-3.90474	-0.915221	0	0	-8.7097	-12.8913	-4.24255	0	0
cg18765405	chr5	134644263	-	cg18765405		OpenSea				IL6L10F	-1.64212	-3.06702	-0.601533	0	0	-9.34934	-13.88	-4.86289	0	0
cg18765405	chr5	134644263	-	cg18765405		OpenSea				TNFR2L10F	-2.78508	-4.67228	-1.27116	0	0	-7.83789	-12.6761	-2.96141	0	0
cg14959425	chr7	20447707	+	cg14959425		OpenSea	ITGB8	NM_002214	Body	CRPL10F	-3.95912	-6.38925	-1.88755	0	0	-10.4336	-16.057	-4.94422	0.002	0.00245079
cg14959425	chr7	20447707	+	cg14959425		OpenSea	ITGB8	NM_002214	Body	IL6L10F	-2.62584	-4.71209	-0.6859	0.006	0.0191179	-11.6638	-17.4521	-5.83374	0	0
cg14959425	chr7	20447707	+	cg14959425		OpenSea	ITGB8	NM_002214	Body	IL1raL10F	-2.1571	-3.83053	-0.801797	0	0	-12.0128	-17.4738	-6.82814	0	0
cg14959425	chr7	20447707	+	cg14959425		OpenSea	ITGB8	NM_002214	Body	TNFR2L10F	-2.16537	-4.16459	-0.835839	0	0	-12.2962	-17.599	-7.11995	0	0
cg17930583	chr6	29591082	+	cg17930583		OpenSea	GABBR1;GABBR1;GABBR1	NM_021904;NM_021903;NM_001470	Body;Body;Body	CRPL10F	-4.36647	-7.6837	-1.81837	0	0	-12.5731	-20.8412	-4.00744	0.004	0.00469301
cg17930583	chr6	29591082	+	cg17930583		OpenSea	GABBR1;GABBR1;GABBR1	NM_021904;NM_021903;NM_001470	Body;Body;Body	IL6L10F	-2.04048	-4.33297	-0.25639	0.016	0.0456034	-14.4767	-22.2386	-6.88107	0	0
cg20703242	chr1	230279135	+	cg20703242		OpenSea	GALNT2	NM_004481	Body	CRPL10F	5.43024	2.66323	8.63521	0	0	7.93563	-0.0222453	15.5867	0.054	0.0563569
cg20703242	chr1	230279135	+	cg20703242		OpenSea	GALNT2	NM_004481	Body	IL6L10F	3.12443	1.12873	5.77904	0	0	10.149	2.34482	18.1178	0.008	0.0090217
cg20703242	chr1	230279135	+	cg20703242		OpenSea	GALNT2	NM_004481	Body	IL1raL10F	2.69937	0.735684	5.31188	0.006	0.0191179	10.9709	2.96604	18.6914	0.006	0.00684628
cg20703242	chr1	230279135	+	cg20703242		OpenSea	GALNT2	NM_004481	Body	TNFR2L10F	5.04835	2.29614	8.16351	0	0	8.79364	1.1464	16.7368	0.028	0.029821
cg06170374	chr11	37533403	-	cg06170374		OpenSea				CRPL10F	-2.60055	-4.48827	-1.12666	0	0	-7.22777	-12.0115	-2.25088	0.004	0.00469301
cg06170374	chr11	37533403	-	cg06170374		OpenSea				IL6L10F	-1.57793	-3.05867	-0.426289	0	0	-8.21342	-12.9728	-3.09721	0	0
cg06170374	chr11	37533403	-	cg06170374		OpenSea				TNFR2L10F	-2.35926	-4.19623	-1.07539	0	0	-7.60471	-12.7593	-2.75719	0.002	0.00245079
cg05422993	chr19	46526863	+	cg05422993	chr19:46526046-46526334	S_Shore	PGLYRP1	NM_005091	TSS1500	CRPL10F	-2.23655	-4.09666	-0.731751	0	0	-7.18937	-12.2219	-2.12402	0.002	0.00245079
cg05422993	chr19	46526863	+	cg05422993	chr19:46526046-46526334	S_Shore	PGLYRP1	NM_005091	TSS1500	IL6L10F	-1.65476	-3.21041	-0.522456	0	0	-8.23422	-12.953	-3.4469	0	0
cg05422993	chr19	46526863	+	cg05422993	chr19:46526046-46526334	S_Shore	PGLYRP1	NM_005091	TSS1500	TNFR2L10F	-2.2958	-4.16518	-0.94879	0	0	-7.5889	-12.4872	-2.69061	0.004	0.00469301
cg17823346	chr10	80848143	-	cg17823346		OpenSea	ZMIZ1	NM_020338	5'UTR	CRPL10F	3.36498	1.08886	6.1699	0.006	0.0191179	2.43135	-4.43796	9.10398	0.478	0.479954
cg17823346	chr10	80848143	-	cg17823346		OpenSea	ZMIZ1	NM_020338	5'UTR	TNFR2L10F	2.20788	0.338296	4.52699	0.012	0.0353974	4.12011	-2.69952	11.7831	0.256	0.258874
cg15656693	chr3	182929476	-	cg15656693		OpenSea	MCF2L2	NM_015078	Body	CRPL10F	-3.16271	-5.21762	-1.41861	0	0	-9.02264	-14.1539	-4.00671	0.002	0.00245079
cg15656693	chr3	182929476	-	cg15656693		OpenSea	MCF2L2	NM_015078	Body	IL6L10F	-2.24786	-3.99306	-0.829451	0	0	-10.1517	-15.3484	-4.97042	0	0
cg15656693	chr3	182929476	-	cg15656693		OpenSea	MCF2L2	NM_015078	Body	TNFR2L10F	-2.68869	-4.47466	-1.15425	0	0	-9.41792	-14.5031	-4.1595	0	0
cg14214717	chr20	5466839	-	cg14214717		OpenSea				CRPL10F	4.27256	1.53853	7.56002	0	0	17.5312	8.29692	26.7217	0	0
cg14214717	chr20	5466839	-	cg14214717		OpenSea				IL6L10F	3.99702	1.47327	7.02981	0	0	17.1683	7.16347	26.1399	0	0
cg14214717	chr20	5466839	-	cg14214717		OpenSea				IL1raL10F	3.28062	0.829826	6.23702	0.002	0.00727322	19.0453	10.1366	28.518	0	0
cg14214717	chr20	5466839	-	cg14214717		OpenSea				TNFR2L10F	4.05387	1.47489	7.32185	0	0	17.2128	8.37128	26.5105	0	0
cg05809362	chr17	38699371	+	cg05809362		OpenSea				CRPL10F	-3.50401	-6.40835	-1.08745	0	0	-14.3161	-21.974	-6.20802	0	0
cg05809362	chr17	38699371	+	cg05809362		OpenSea				IL6L10F	-2.35765	-4.82256	-0.714055	0.006	0.0191179	-15.961	-23.9233	-7.80442	0	0
cg05809362	chr17	38699371	+	cg05809362		OpenSea				TNFR2L10F	-3.51181	-5.97967	-1.44983	0	0	-14.1966	-21.5158	-5.67459	0	0
cg01900480	chr5	139068516	+	cg01900480		OpenSea				CRPL10F	3.8931	1.68425	6.87813	0	0	7.93802	1.1649	15.4876	0.02	0.0215556
cg01900480	chr5	139068516	+	cg01900480		OpenSea				IL6L10F	2.36254	0.740479	4.64795	0	0	9.22164	2.03713	16.57	0.006	0.00684628
cg01900480	chr5	139068516	+	cg01900480		OpenSea				TNFR2L10F	3.83858	1.71361	6.63023	0	0	8.22871	0.921355	15.8025	0.022	0.023617
cg02695372	chr7	106320126	-	cg02695372		OpenSea				CRPL10F	-2.74204	-4.35996	-1.4232	0	0	-7.32387	-11.3279	-3.04459	0	0
cg02695372	chr7	106320126	-	cg02695372		OpenSea				IL6L10F	-1.74547	-3.21298	-0.573392	0.002	0.00727322	-8.37279	-12.4729	-4.39904	0	0
cg02695372	chr7	106320126	-	cg02695372		OpenSea				TNFR2L10F	-2.49613	-4.38178	-1.04271	0.004	0.0134261	-7.6182	-11.6502	-3.67123	0	0
cg03487391	chr2	219596537	-	cg03487391		OpenSea	TTLL4	NM_014640	5'UTR	CRPL10F	-2.11344	-3.58343	-0.968861	0	0	-8.422	-12.5446	-4.38441	0	0
cg03487391	chr2	219596537	-	cg03487391		OpenSea	TTLL4	NM_014640	5'UTR	IL6L10F	-1.43005	-2.84074	-0.461804	0	0	-9.13505	-13.3302	-4.52946	0	0
cg03224013	chr14	106382726	-	cg03224013		OpenSea	KIAA0125	NR_026800	TSS1500	TNFR2L10F	1.49571	0.482246	3.00939	0.004	0.0134261	4.87849	0.915929	8.6299	0.018	0.0195012
cg26955383	chr10	105218660	-	cg26955383	chr10:105217966-105218287	S_Shore	CALHM1	NM_001001412	TSS200	CRPL10F	3.51485	1.69564	5.75484	0	0	9.82469	5.18342	14.6251	0	0
cg26955383	chr10	105218660	-	cg26955383	chr10:105217966-105218287	S_Shore	CALHM1	NM_001001412	TSS200	IL6L10F	2.62729	0.691377	4.82377	0.008	0.0244802	10.8302	5.53233	15.8408	0	0
cg26955383	chr10	105218660	-	cg26955383	chr10:105217966-105218287	S_Shore	CALHM1	NM_001001412	TSS200	IL1raL10F	2.13735	0.82208	3.89477	0.002	0.00727322	11.1395	5.98487	16.0176	0	0
cg26955383	chr10	105218660	-	cg26955383	chr10:105217966-105218287	S_Shore	CALHM1	NM_001001412	TSS200	TNFR2L10F	2.56004	1.08532	4.28455	0	0	10.7385	6.1199	15.4702	0	0
cg18146146	chr19	47247380	+	cg18146146	chr19:47248749-47249948	N_Shore	STRN4;STRN4	NM_001039877;NM_013403	Body;Body	CRPL10F	-1.52564	-2.81378	-0.453912	0.002	0.00727322	-4.94927	-8.53602	-1.26361	0.01	0.0111331
cg18146146	chr19	47247380	+	cg18146146	chr19:47248749-47249948	N_Shore	STRN4;STRN4	NM_001039877;NM_013403	Body;Body	IL6L10F	-1.09043	-2.10696	-0.292298	0.002	0.00727322	-5.5398	-9.48877	-1.83441	0.004	0.00469301
cg18146146	chr19	47247380	+	cg18146146	chr19:47248749-47249948	N_Shore	STRN4;STRN4	NM_001039877;NM_013403	Body;Body	TNFR2L10F	-1.97947	-3.34742	-0.840826	0	0	-4.79329	-8.35039	-1.20369	0.014	0.0153212
cg06527396	chr3	128959178	+	cg06527396		OpenSea				TNFR2L10F	-1.80657	-3.29149	-0.613803	0.002	0.00727322	-8.57612	-13.2486	-4.00742	0	0
cg06166051	chr2	179696896	+	cg06166051		OpenSea	CCDC141	NM_173648	3'UTR	IL6L10F	-1.85629	-3.5029	-0.653309	0	0	-10.0309	-15.7833	-4.34247	0	0
cg22594985	chr5	153457958	-	cg22594985		OpenSea				CRPL10F	1.51617	0.559787	2.88404	0.002	0.00727322	5.48668	1.99373	8.94082	0.002	0.00245079
cg22594985	chr5	153457958	-	cg22594985		OpenSea				IL6L10F	1.24189	0.452862	2.19915	0	0	5.88077	2.51621	9.37524	0	0
cg22594985	chr5	153457958	-	cg22594985		OpenSea				TNFR2L10F	1.93171	0.811578	3.22269	0	0	5.14186	1.80424	8.51556	0.004	0.00469301
cg21871141	chr13	26597180	-	cg21871141		OpenSea				IL6L10F	-2.49151	-4.97725	-0.538877	0.004	0.0134261	-14.4784	-23.2597	-6.29903	0.002	0.00245079
cg07865630	chr6	139794360	-	cg07865630		OpenSea	LOC645434	NR_033919	Body	CRPL10F	-1.78096	-2.83339	-0.892255	0	0	-5.51967	-7.9174	-2.85869	0	0
cg07865630	chr6	139794360	-	cg07865630		OpenSea	LOC645434	NR_033919	Body	IL6L10F	-1.09605	-2.05205	-0.289828	0.004	0.0134261	-6.29426	-9.00058	-3.73016	0	0
cg07865630	chr6	139794360	-	cg07865630		OpenSea	LOC645434	NR_033919	Body	IL1raL10F	-0.806654	-1.57268	-0.189422	0.002	0.00727322	-6.45965	-8.98572	-4.01076	0	0
cg07865630	chr6	139794360	-	cg07865630		OpenSea	LOC645434	NR_033919	Body	TNFR2L10F	-1.36728	-2.42714	-0.543138	0.002	0.00727322	-5.86065	-8.49618	-3.36985	0	0
cg21457573	chr1	6822395	-	cg21457573		OpenSea				IL6L10F	-1.57966	-3.38841	-0.285666	0.008	0.0244802	-9.75992	-15.8494	-4.11805	0	0
cg21457573	chr1	6822395	-	cg21457573		OpenSea				TNFR2L10F	-2.02869	-3.97186	-0.46855	0.012	0.0353974	-9.27125	-15.6224	-3.14501	0.002	0.00245079
cg06705237	chr9	97402555	-	cg06705237	chr9:97401286-97402067	S_Shore	FBP1;FBP1	NM_001127628;NM_000507	TSS200;TSS1500	CRPL10F	-1.89795	-3.56893	-0.500943	0.004	0.0134261	-9.09798	-13.8321	-4.39599	0	0
cg06705237	chr9	97402555	-	cg06705237	chr9:97401286-97402067	S_Shore	FBP1;FBP1	NM_001127628;NM_000507	TSS200;TSS1500	TNFR2L10F	-1.93692	-3.5315	-0.739012	0	0	-9.26268	-13.9909	-4.45714	0	0
cg08303079	chr9	132345286	+	cg08303079		OpenSea				CRPL10F	-2.97729	-5.06518	-1.38227	0	0	-8.52889	-13.1827	-3.50508	0.002	0.00245079
cg08303079	chr9	132345286	+	cg08303079		OpenSea				IL6L10F	-1.63351	-3.17712	-0.445509	0.006	0.0191179	-9.98308	-15.2638	-4.16201	0	0
cg08303079	chr9	132345286	+	cg08303079		OpenSea				IL1raL10F	-1.75244	-3.4093	-0.483825	0.002	0.00727322	-9.89087	-14.9329	-4.61099	0	0
cg08303079	chr9	132345286	+	cg08303079		OpenSea				TNFR2L10F	-2.65801	-4.72275	-1.15065	0	0	-9.15068	-14.683	-3.70087	0	0
cg07225450	chr21	39592213	+	cg07225450		OpenSea				CRPL10F	-1.93174	-3.06382	-0.992541	0	0	-5.32801	-7.975	-2.66119	0	0
cg07225450	chr21	39592213	+	cg07225450		OpenSea				IL6L10F	-1.10635	-2.02508	-0.359287	0	0	-6.17022	-8.71026	-3.52626	0	0
cg07225450	chr21	39592213	+	cg07225450		OpenSea				IL1raL10F	-1.04131	-1.8466	-0.350187	0.002	0.00727322	-6.28172	-8.92864	-3.71972	0	0
cg07225450	chr21	39592213	+	cg07225450		OpenSea				TNFR2L10F	-1.61017	-2.7663	-0.634325	0	0	-5.64451	-8.42529	-2.97241	0	0
cg26073844	chr8	130799093	+	cg26073844		OpenSea	GSDMC;GSDMC	NM_031415;NM_031415	1stExon;5'UTR	IL6L10F	-2.18162	-4.23127	-0.594717	0.006	0.0191179	-12.77	-19.5227	-5.9747	0	0
cg26073844	chr8	130799093	+	cg26073844		OpenSea	GSDMC;GSDMC	NM_031415;NM_031415	1stExon;5'UTR	TNFR2L10F	-3.04728	-5.4975	-1.15151	0	0	-11.5924	-18.3673	-4.51491	0	0
cg01436651	chr18	52029246	-	cg01436651		OpenSea				IL6L10F	-1.63505	-3.36469	-0.337992	0.014	0.0406753	-13.2469	-19.4124	-7.47111	0	0
cg01436651	chr18	52029246	-	cg01436651		OpenSea				TNFR2L10F	-2.1754	-4.34135	-0.575754	0	0	-12.5668	-18.788	-6.51972	0	0
cg18685080	chr16	81553347	+	cg18685080		OpenSea	CMIP;CMIP	NM_198390;NM_030629	Body;Body	CRPL10F	-3.05354	-5.16564	-1.27716	0	0	-9.70315	-15.4709	-4.00565	0	0
cg18685080	chr16	81553347	+	cg18685080		OpenSea	CMIP;CMIP	NM_198390;NM_030629	Body;Body	IL6L10F	-2.00659	-3.88709	-0.669583	0.002	0.00727322	-10.4621	-16.5084	-4.67665	0	0
cg18685080	chr16	81553347	+	cg18685080		OpenSea	CMIP;CMIP	NM_198390;NM_030629	Body;Body	TNFR2L10F	-3.05603	-5.17413	-1.30905	0	0	-9.72302	-15.4641	-3.61001	0.002	0.00245079
cg12285003	chr20	61596335	+	cg12285003		OpenSea	SLC17A9;SLC17A9	NM_022082;NM_001302643	Body;Body	CRPL10F	2.96016	1.22826	5.18189	0	0	6.47699	0.313654	12.5066	0.03	0.0318757
cg12285003	chr20	61596335	+	cg12285003		OpenSea	SLC17A9;SLC17A9	NM_022082;NM_001302643	Body;Body	IL6L10F	2.10116	0.735821	3.88539	0	0	7.66394	1.48653	13.9362	0.018	0.0195012
cg12285003	chr20	61596335	+	cg12285003		OpenSea	SLC17A9;SLC17A9	NM_022082;NM_001302643	Body;Body	TNFR2L10F	3.97106	1.85914	6.5833	0	0	5.66833	-0.239258	12.0164	0.064	0.0664852
cg08928261	chr4	40240766	-	cg08928261		OpenSea	RHOH;RHOH;RHOH;RHOH;RHOH;RHOH;RHOH;RHOH;RHOH;RHOH;RHOH;RHOH	NM_001278368;NM_001278367;NM_001278366;NM_001278365;NM_001278364;NM_001278369;NM_004310;NM_001278363;NM_001278362;NM_001278361;NM_001278360;NM_001278359	5'UTR;5'UTR;5'UTR;5'UTR;5'UTR;5'UTR;5'UTR;5'UTR;5'UTR;5'UTR;5'UTR;5'UTR	CRPL10F	-2.82573	-4.47769	-1.43201	0	0	-7.64888	-11.5398	-3.60916	0	0
cg08928261	chr4	40240766	-	cg08928261		OpenSea	RHOH;RHOH;RHOH;RHOH;RHOH;RHOH;RHOH;RHOH;RHOH;RHOH;RHOH;RHOH	NM_001278368;NM_001278367;NM_001278366;NM_001278365;NM_001278364;NM_001278369;NM_004310;NM_001278363;NM_001278362;NM_001278361;NM_001278360;NM_001278359	5'UTR;5'UTR;5'UTR;5'UTR;5'UTR;5'UTR;5'UTR;5'UTR;5'UTR;5'UTR;5'UTR;5'UTR	IL6L10F	-1.47024	-2.74038	-0.464937	0	0	-9.25219	-13.4241	-5.50117	0	0
cg08928261	chr4	40240766	-	cg08928261		OpenSea	RHOH;RHOH;RHOH;RHOH;RHOH;RHOH;RHOH;RHOH;RHOH;RHOH;RHOH;RHOH	NM_001278368;NM_001278367;NM_001278366;NM_001278365;NM_001278364;NM_001278369;NM_004310;NM_001278363;NM_001278362;NM_001278361;NM_001278360;NM_001278359	5'UTR;5'UTR;5'UTR;5'UTR;5'UTR;5'UTR;5'UTR;5'UTR;5'UTR;5'UTR;5'UTR;5'UTR	IL1raL10F	-1.35548	-2.63358	-0.415089	0.002	0.00727322	-9.43041	-13.4352	-5.3422	0	0
cg08928261	chr4	40240766	-	cg08928261		OpenSea	RHOH;RHOH;RHOH;RHOH;RHOH;RHOH;RHOH;RHOH;RHOH;RHOH;RHOH;RHOH	NM_001278368;NM_001278367;NM_001278366;NM_001278365;NM_001278364;NM_001278369;NM_004310;NM_001278363;NM_001278362;NM_001278361;NM_001278360;NM_001278359	5'UTR;5'UTR;5'UTR;5'UTR;5'UTR;5'UTR;5'UTR;5'UTR;5'UTR;5'UTR;5'UTR;5'UTR	TNFR2L10F	-2.43912	-4.04203	-0.969781	0	0	-8.3235	-12.3547	-3.95143	0	0
cg27339271	chr10	90553647	-	cg27339271		OpenSea				CRPL10F	-1.93866	-3.4071	-0.891771	0	0	-8.49468	-12.4022	-4.76451	0	0
cg27339271	chr10	90553647	-	cg27339271		OpenSea				IL6L10F	-1.19142	-2.30572	-0.374514	0.002	0.00727322	-9.19286	-12.9292	-5.48974	0	0
cg27339271	chr10	90553647	-	cg27339271		OpenSea				TNFR2L10F	-1.39145	-2.57441	-0.450729	0.004	0.0134261	-9.088	-12.5841	-5.42132	0	0
cg18403006	chr8	130695235	-	cg18403006		OpenSea				CRPL10F	-4.13056	-7.41268	-1.48783	0	0	-19.1966	-27.6578	-10.7492	0	0
cg18403006	chr8	130695235	-	cg18403006		OpenSea				IL6L10F	-2.86393	-5.57011	-0.91798	0.002	0.00727322	-20.8372	-29.471	-12.1771	0	0
cg18403006	chr8	130695235	-	cg18403006		OpenSea				TNFR2L10F	-3.30481	-6.23422	-1.09453	0	0	-20.0356	-29.2053	-11.1189	0	0
cg10834218	chr20	8053963	-	cg10834218		OpenSea				CRPL10F	-2.58951	-4.12123	-1.30819	0	0	-5.58105	-9.08901	-2.02623	0	0
cg10834218	chr20	8053963	-	cg10834218		OpenSea				IL6L10F	-1.67942	-3.06667	-0.54364	0	0	-6.53305	-9.90279	-3.06291	0	0
cg10834218	chr20	8053963	-	cg10834218		OpenSea				IL1raL10F	-1.41566	-2.62887	-0.478478	0	0	-6.87506	-10.2646	-3.47542	0	0
cg10834218	chr20	8053963	-	cg10834218		OpenSea				TNFR2L10F	-1.77834	-3.05477	-0.750384	0	0	-6.55711	-10.0696	-3.15487	0	0
cg20248701	chr3	53868093	+	cg20248701		OpenSea	CHDH	NM_018397	5'UTR	CRPL10F	-3.16402	-5.00451	-1.55009	0	0	-7.3281	-11.6784	-3.07795	0.002	0.00245079
cg20248701	chr3	53868093	+	cg20248701		OpenSea	CHDH	NM_018397	5'UTR	IL6L10F	-2.13844	-3.94154	-0.661344	0.002	0.00727322	-8.83571	-13.5537	-4.28468	0	0
cg20248701	chr3	53868093	+	cg20248701		OpenSea	CHDH	NM_018397	5'UTR	IL1raL10F	-1.58484	-2.95765	-0.472215	0.002	0.00727322	-8.80295	-13.2582	-4.29145	0	0
cg20248701	chr3	53868093	+	cg20248701		OpenSea	CHDH	NM_018397	5'UTR	TNFR2L10F	-2.57471	-4.32629	-1.08481	0	0	-7.89406	-12.141	-3.3539	0.002	0.00245079
cg13314505	chr11	133835493	+	cg13314505		OpenSea				CRPL10F	-2.13946	-3.92907	-0.39049	0.008	0.0244802	-12.3219	-18.1408	-6.68065	0	0
cg13314505	chr11	133835493	+	cg13314505		OpenSea				IL1raL10F	-1.93602	-3.78081	-0.415198	0.008	0.0244802	-12.513	-18.2461	-6.66461	0	0
cg03924136	chr20	62367108	-	cg03924136	chr20:62368955-62371962	N_Shore	LIME1;LIME1;LIME1;LIME1;ZGPAT;ZGPAT;ZGPAT;ZGPAT;ZGPAT	NM_017806;NM_001305655;NM_001305654;NM_001305654;NM_181485;NM_001195654;NM_001195653;NM_032527;NM_001083113	TSS1500;TSS1500;1stExon;5'UTR;Body;Body;Body;Body;Body	CRPL10F	2.45633	1.1566	4.11559	0	0	7.18971	2.99385	11.6567	0.002	0.00245079
cg03924136	chr20	62367108	-	cg03924136	chr20:62368955-62371962	N_Shore	LIME1;LIME1;LIME1;LIME1;ZGPAT;ZGPAT;ZGPAT;ZGPAT;ZGPAT	NM_017806;NM_001305655;NM_001305654;NM_001305654;NM_181485;NM_001195654;NM_001195653;NM_032527;NM_001083113	TSS1500;TSS1500;1stExon;5'UTR;Body;Body;Body;Body;Body	IL6L10F	1.95353	0.64575	3.56852	0	0	7.69561	3.21022	12.1033	0	0
cg03924136	chr20	62367108	-	cg03924136	chr20:62368955-62371962	N_Shore	LIME1;LIME1;LIME1;LIME1;ZGPAT;ZGPAT;ZGPAT;ZGPAT;ZGPAT	NM_017806;NM_001305655;NM_001305654;NM_001305654;NM_181485;NM_001195654;NM_001195653;NM_032527;NM_001083113	TSS1500;TSS1500;1stExon;5'UTR;Body;Body;Body;Body;Body	TNFR2L10F	2.83174	1.2953	4.53733	0.002	0.00727322	6.84254	2.21728	11.4942	0.004	0.00469301
cg06092244	chr2	48796151	-	cg06092244		OpenSea	STON1-GTF2A1L	NM_172311	TSS200	CRPL10F	-1.79642	-2.82262	-0.915518	0	0	-4.05048	-6.72154	-1.32557	0.002	0.00245079
cg06092244	chr2	48796151	-	cg06092244		OpenSea	STON1-GTF2A1L	NM_172311	TSS200	IL6L10F	-1.19307	-2.14935	-0.425106	0.002	0.00727322	-4.57644	-7.23253	-1.93909	0	0
cg06092244	chr2	48796151	-	cg06092244		OpenSea	STON1-GTF2A1L	NM_172311	TSS200	IL1raL10F	-1.12451	-2.04095	-0.410425	0	0	-4.71114	-7.44611	-2.07668	0.002	0.00245079
cg06092244	chr2	48796151	-	cg06092244		OpenSea	STON1-GTF2A1L	NM_172311	TSS200	TNFR2L10F	-1.54099	-2.54733	-0.660006	0	0	-4.23854	-7.00583	-1.73299	0.004	0.00469301
cg01015210	chr5	141475540	-	cg01015210		OpenSea				CRPL10F	-2.76608	-4.52892	-1.32419	0	0	-6.81539	-10.5938	-2.93784	0	0
cg01015210	chr5	141475540	-	cg01015210		OpenSea				IL6L10F	-1.52127	-2.95881	-0.45169	0.002	0.00727322	-8.17175	-11.9395	-4.26062	0	0
cg01015210	chr5	141475540	-	cg01015210		OpenSea				IL1raL10F	-1.43864	-2.60326	-0.496954	0.002	0.00727322	-8.11414	-12.002	-4.23557	0	0
cg01015210	chr5	141475540	-	cg01015210		OpenSea				TNFR2L10F	-2.32663	-4.03922	-0.857025	0	0	-7.34569	-11.3567	-3.40409	0.002	0.00245079
cg04136748	chr5	133515262	-	cg04136748	chr5:133511971-133512902	S_Shelf				TNFR2L10F	-4.39574	-8.2474	-1.53217	0	0	-16.87	-28.7776	-5.99248	0.006	0.00684628
cg16498856	chr3	141196360	+	cg16498856		OpenSea				CRPL10F	-2.37165	-3.89658	-1.11185	0	0	-7.61072	-11.6407	-3.60223	0	0
cg16498856	chr3	141196360	+	cg16498856		OpenSea				IL6L10F	-1.80686	-3.39162	-0.571775	0.004	0.0134261	-8.55376	-12.9529	-4.79041	0	0
cg16498856	chr3	141196360	+	cg16498856		OpenSea				IL1raL10F	-1.37255	-2.62868	-0.400475	0.004	0.0134261	-8.82605	-12.7077	-5.22889	0	0
cg16498856	chr3	141196360	+	cg16498856		OpenSea				TNFR2L10F	-2.30874	-4.02792	-0.853749	0	0	-7.95034	-11.8501	-4.04648	0	0
cg25371251	chr11	68483493	+	cg25371251		OpenSea	5	NM_004923	Body	CRPL10F	-2.35037	-4.14053	-0.968316	0	0	-10.2004	-14.6871	-5.54158	0	0
cg25371251	chr11	68483493	+	cg25371251		OpenSea	5	NM_004923	Body	IL6L10F	-1.45412	-2.909	-0.402432	0.004	0.0134261	-11.2186	-15.8408	-6.32819	0	0
cg25371251	chr11	68483493	+	cg25371251		OpenSea	5	NM_004923	Body	IL1raL10F	-1.38931	-2.81899	-0.24902	0.016	0.0456034	-11.4713	-16.4084	-6.63114	0	0
cg25371251	chr11	68483493	+	cg25371251		OpenSea	5	NM_004923	Body	TNFR2L10F	-1.83444	-3.36407	-0.639586	0	0	-10.9987	-15.6461	-6.35705	0	0
cg11558387	chr1	118139009	+	cg11558387		OpenSea				TNFR2L10F	-2.38477	-4.14082	-0.987449	0	0	-8.22234	-13.1342	-2.99068	0	0
cg22066978	chr5	55350682	+	cg22066978		OpenSea				CRPL10F	-2.64196	-4.47617	-1.16076	0	0	-10.3085	-15.334	-5.41395	0	0
cg22066978	chr5	55350682	+	cg22066978		OpenSea				IL6L10F	-1.71369	-3.26059	-0.535654	0.002	0.00727322	-11.2878	-16.2884	-6.67591	0	0
cg22066978	chr5	55350682	+	cg22066978		OpenSea				TNFR2L10F	-2.34224	-4.05295	-0.93281	0	0	-10.5697	-15.8859	-5.22688	0	0
cg16545370	chr18	42475531	+	cg16545370		OpenSea	SETBP1	NM_015559	Body	CRPL10F	-2.88033	-4.71924	-1.32235	0	0	-8.96057	-14.3681	-3.83388	0.002	0.00245079
cg16545370	chr18	42475531	+	cg16545370		OpenSea	SETBP1	NM_015559	Body	TNFR2L10F	-2.31891	-4.05159	-0.956096	0	0	-9.55782	-14.7438	-4.63831	0	0
cg11226378	chr1	97990981	-	cg11226378		OpenSea	DPYD	NM_000110	Body	CRPL10F	-3.00912	-5.10464	-1.25673	0.002	0.00727322	-11.6917	-17.0352	-5.85933	0	0
cg11226378	chr1	97990981	-	cg11226378		OpenSea	DPYD	NM_000110	Body	IL6L10F	-1.71223	-3.55667	-0.332086	0.008	0.0244802	-13.2096	-19.322	-7.02119	0	0
cg11226378	chr1	97990981	-	cg11226378		OpenSea	DPYD	NM_000110	Body	IL1raL10F	-2.18443	-4.14933	-0.72545	0	0	-13.1784	-18.8016	-7.14356	0	0
cg11226378	chr1	97990981	-	cg11226378		OpenSea	DPYD	NM_000110	Body	TNFR2L10F	-1.97233	-3.78115	-0.492463	0.004	0.0134261	-13.0195	-18.723	-7.12127	0	0
cg16431791	chr19	14783092	+	cg16431791		OpenSea	ADGRE3;ADGRE3;ADGRE3	NM_032571;NM_001289159;NM_001289158	Body;Body;Body	CRPL10F	3.26983	1.72005	5.30348	0	0	7.01417	2.49978	11.437	0.004	0.00469301
cg16431791	chr19	14783092	+	cg16431791		OpenSea	ADGRE3;ADGRE3;ADGRE3	NM_032571;NM_001289159;NM_001289158	Body;Body;Body	IL6L10F	2.05002	0.634791	3.83572	0.006	0.0191179	8.16378	3.40942	12.5249	0.002	0.00245079
cg16431791	chr19	14783092	+	cg16431791		OpenSea	ADGRE3;ADGRE3;ADGRE3	NM_032571;NM_001289159;NM_001289158	Body;Body;Body	IL1raL10F	1.91008	0.724707	3.47275	0	0	8.91318	4.63799	13.4615	0	0
cg16431791	chr19	14783092	+	cg16431791		OpenSea	ADGRE3;ADGRE3;ADGRE3	NM_032571;NM_001289159;NM_001289158	Body;Body;Body	TNFR2L10F	2.10319	0.805095	3.7515	0	0	8.26474	3.71117	12.589	0	0
cg12573289	chr7	45075791	+	cg12573289		OpenSea	CCM2;CCM2;CCM2;CCM2;CCM2	NM_031443;NM_001029835;NM_001167935;NM_001167934;NR_030770	Body;Body;Body;Body;Body	CRPL10F	6.33231	2.77577	10.9337	0	0	16.1778	4.21448	28.376	0.01	0.0111331
cg12573289	chr7	45075791	+	cg12573289		OpenSea	CCM2;CCM2;CCM2;CCM2;CCM2	NM_031443;NM_001029835;NM_001167935;NM_001167934;NR_030770	Body;Body;Body;Body;Body	IL6L10F	4.73111	1.79484	8.49479	0.004	0.0134261	17.611	5.86918	30.8557	0.002	0.00245079
cg12573289	chr7	45075791	+	cg12573289		OpenSea	CCM2;CCM2;CCM2;CCM2;CCM2	NM_031443;NM_001029835;NM_001167935;NM_001167934;NR_030770	Body;Body;Body;Body;Body	TNFR2L10F	6.92376	2.97197	11.6117	0	0	16.4228	5.03199	28.4959	0.01	0.0111331
cg14195992	chr8	48265917	-	cg14195992		OpenSea	KIAA0146	NM_001080394	Body	CRPL10F	-2.22822	-3.84358	-0.955436	0	0	-8.22528	-12.0824	-4.12304	0	0
cg14195992	chr8	48265917	-	cg14195992		OpenSea	KIAA0146	NM_001080394	Body	IL6L10F	-2.07843	-3.75375	-0.742415	0	0	-8.5162	-12.8811	-4.2777	0	0
cg14195992	chr8	48265917	-	cg14195992		OpenSea	KIAA0146	NM_001080394	Body	IL1raL10F	-1.76699	-3.26379	-0.571993	0	0	-8.90681	-13.0635	-4.5817	0	0
cg14195992	chr8	48265917	-	cg14195992		OpenSea	KIAA0146	NM_001080394	Body	TNFR2L10F	-2.10603	-3.56173	-0.903873	0	0	-8.38084	-12.5942	-4.23003	0	0
cg21243269	chr16	57157904	-	cg21243269		OpenSea	CPNE2	NM_152727	Body	CRPL10F	-3.34031	-6.13574	-1.21885	0	0	-8.03547	-15.2757	-0.972148	0.022	0.023617
cg21243269	chr16	57157904	-	cg21243269		OpenSea	CPNE2	NM_152727	Body	TNFR2L10F	-3.55884	-6.31085	-1.36608	0	0	-7.77373	-15.0689	-0.302849	0.034	0.0359702
cg17321267	chr19	5669909	+	cg17321267		OpenSea				CRPL10F	1.67659	0.679609	2.9584	0	0	4.56036	1.29244	8.00709	0.006	0.00684628
cg17321267	chr19	5669909	+	cg17321267		OpenSea				IL6L10F	1.04434	0.323403	2.03559	0.002	0.00727322	5.17753	1.55273	8.70466	0.004	0.00469301
cg17321267	chr19	5669909	+	cg17321267		OpenSea				TNFR2L10F	2.23598	0.914053	3.826	0	0	4.32202	0.866656	7.87544	0.014	0.0153212
cg09977703	chr19	46854563	+	cg09977703	chr19:46850185-46850678	S_Shelf	PPP5C	NM_006247	Body	CRPL10F	-1.20295	-2.09249	-0.436665	0.002	0.00727322	-3.24823	-5.71976	-0.653697	0.012	0.0132289
cg09977703	chr19	46854563	+	cg09977703	chr19:46850185-46850678	S_Shelf	PPP5C	NM_006247	Body	IL6L10F	-0.720343	-1.47737	-0.162132	0.006	0.0191179	-3.87222	-6.44794	-1.24333	0.01	0.0111331
cg09977703	chr19	46854563	+	cg09977703	chr19:46850185-46850678	S_Shelf	PPP5C	NM_006247	Body	IL1raL10F	-0.792543	-1.60096	-0.152197	0.008	0.0244802	-3.70613	-6.21179	-1.17065	0.006	0.00684628
cg09977703	chr19	46854563	+	cg09977703	chr19:46850185-46850678	S_Shelf	PPP5C	NM_006247	Body	TNFR2L10F	-1.20478	-2.19252	-0.40032	0	0	-3.47133	-6.14472	-0.954083	0.008	0.0090217
cg20559059	chr10	134178970	+	cg20559059		OpenSea	LRRC27;LRRC27;LRRC27	NM_030626;NM_001143757;NM_001309474	Body;Body;Body	TNFR2L10F	3.56636	1.40177	6.61347	0	0	8.95933	1.43277	16.9363	0.028	0.029821
cg16161069	chr16	442770	-	cg16161069		OpenSea	LOC100134368	NR_024453	Body	CRPL10F	1.90224	0.660837	3.37392	0.004	0.0134261	6.53606	2.26976	11.1148	0.006	0.00684628
cg16161069	chr16	442770	-	cg16161069		OpenSea	LOC100134368	NR_024453	Body	IL6L10F	1.71895	0.656042	3.26305	0	0	6.76943	2.34016	11.1965	0.004	0.00469301
cg16161069	chr16	442770	-	cg16161069		OpenSea	LOC100134368	NR_024453	Body	TNFR2L10F	2.6796	1.25038	4.38463	0	0	6.25546	1.65448	10.5575	0.004	0.00469301
cg26468118	chr13	111175670	-	cg26468118		OpenSea	RAB20	NM_017817	3'UTR	IL6L10F	-1.37559	-2.70252	-0.406752	0.002	0.00727322	-5.77783	-10.1444	-1.49146	0.008	0.0090217
cg26468118	chr13	111175670	-	cg26468118		OpenSea	RAB20	NM_017817	3'UTR	TNFR2L10F	-2.45781	-4.27199	-1.20411	0	0	-5.02209	-9.03331	-0.683984	0.03	0.0318757
cg14009097	chr11	113905622	+	cg14009097	chr11:113906920-113907332	N_Shore				CRPL10F	6.41367	3.4345	10.4293	0	0	13.078	4.00007	21.6436	0.01	0.0111331
cg14009097	chr11	113905622	+	cg14009097	chr11:113906920-113907332	N_Shore				IL6L10F	4.31784	1.37279	7.82972	0.006	0.0191179	15.0413	6.23008	24.163	0.002	0.00245079
cg14009097	chr11	113905622	+	cg14009097	chr11:113906920-113907332	N_Shore				TNFR2L10F	5.3549	2.48394	9.04132	0	0	14.0388	4.96176	22.5592	0	0
cg20804821	chr3	51988454	+	cg20804821	chr3:51989763-51990639	N_Shore	GPR62	NM_080865	TSS1500	CRPL10F	2.7806	1.09088	4.8097	0	0	5.87242	0.274239	11.076	0.04	0.0420708
cg20804821	chr3	51988454	+	cg20804821	chr3:51989763-51990639	N_Shore	GPR62	NM_080865	TSS1500	TNFR2L10F	2.55062	1.0023	4.52777	0	0	6.02884	0.589918	11.6083	0.024	0.0256824
cg21081878	chr21	38334730	-	cg21081878	chr21:38338384-38338904	N_Shelf	HLCS	NM_000411	5'UTR	CRPL10F	2.24424	0.941517	3.83857	0	0	7.56276	3.31096	11.8223	0	0
cg21081878	chr21	38334730	-	cg21081878	chr21:38338384-38338904	N_Shelf	HLCS	NM_000411	5'UTR	IL6L10F	1.42518	0.447558	2.79089	0	0	8.33355	3.95232	12.5168	0	0
cg21081878	chr21	38334730	-	cg21081878	chr21:38338384-38338904	N_Shelf	HLCS	NM_000411	5'UTR	IL1raL10F	1.48052	0.375369	2.79459	0.004	0.0134261	8.24544	3.83206	12.8248	0	0
cg21081878	chr21	38334730	-	cg21081878	chr21:38338384-38338904	N_Shelf	HLCS	NM_000411	5'UTR	TNFR2L10F	2.03446	0.727369	3.64127	0	0	7.91618	3.51111	12.3566	0	0
cg08074885	chr15	39746976	+	cg08074885		OpenSea				CRPL10F	-2.45045	-3.95717	-1.19199	0	0	-6.88399	-10.5994	-2.709	0	0
cg08074885	chr15	39746976	+	cg08074885		OpenSea				IL6L10F	-1.75803	-3.17743	-0.568853	0	0	-7.60977	-11.4761	-3.75863	0	0
cg08074885	chr15	39746976	+	cg08074885		OpenSea				IL1raL10F	-1.61721	-2.8761	-0.635167	0	0	-7.63974	-11.5099	-3.77038	0	0
cg08074885	chr15	39746976	+	cg08074885		OpenSea				TNFR2L10F	-2.27182	-3.81426	-0.903307	0	0	-7.14798	-11.0933	-3.52243	0	0
cg09536564	chr1	221467746	-	cg09536564		OpenSea				CRPL10F	-3.31638	-5.45188	-1.6055	0	0	-9.46081	-14.6834	-4.26206	0.002	0.00245079
cg09536564	chr1	221467746	-	cg09536564		OpenSea				IL6L10F	-1.82542	-3.54032	-0.544559	0	0	-10.9714	-16.0078	-5.948	0	0
cg09536564	chr1	221467746	-	cg09536564		OpenSea				IL1raL10F	-1.72457	-3.29502	-0.49059	0.008	0.0244802	-10.8208	-15.8467	-5.96033	0	0
cg09536564	chr1	221467746	-	cg09536564		OpenSea				TNFR2L10F	-2.87289	-4.95835	-1.24194	0	0	-9.79153	-14.9635	-4.87486	0	0
cg09555736	chr16	474271	+	cg09555736	chr16:474922-476815	N_Shore	RAB11FIP3	NM_014700	TSS1500	CRPL10F	1.9982	0.844575	3.50254	0	0	5.71787	1.88858	9.61657	0.002	0.00245079
cg09555736	chr16	474271	+	cg09555736	chr16:474922-476815	N_Shore	RAB11FIP3	NM_014700	TSS1500	IL6L10F	1.46353	0.495057	2.62453	0	0	6.19662	2.00927	10.3612	0.004	0.00469301
cg09555736	chr16	474271	+	cg09555736	chr16:474922-476815	N_Shore	RAB11FIP3	NM_014700	TSS1500	TNFR2L10F	2.04002	0.817325	3.75598	0	0	5.76466	1.49507	9.92626	0.006	0.00684628
cg03263792	chr19	11406114	+	cg03263792	chr19:11404512-11404776	S_Shore	TSPAN16	NM_012466	TSS1500	TNFR2L10F	-2.35776	-4.64225	-0.592338	0.008	0.0244802	-15.0274	-22.1956	-7.28145	0	0
cg08549335	chr7	30387954	-	cg08549335		OpenSea	ZNRF2	NM_147128	Body	CRPL10F	-1.56834	-2.49141	-0.772825	0	0	-3.47747	-5.55987	-1.10521	0	0
cg08549335	chr7	30387954	-	cg08549335		OpenSea	ZNRF2	NM_147128	Body	IL6L10F	-1.09871	-1.9111	-0.393556	0.002	0.00727322	-3.75858	-6.11344	-1.41211	0	0
cg08549335	chr7	30387954	-	cg08549335		OpenSea	ZNRF2	NM_147128	Body	TNFR2L10F	-1.43596	-2.44014	-0.610649	0	0	-3.50946	-5.84116	-1.29	0	0
cg25501329	chr16	59934140	-	cg25501329		OpenSea	LOC101927580	NR_110917	Body	CRPL10F	1.4869	0.369378	2.84827	0.002	0.00727322	7.07339	3.58858	10.5923	0	0
cg25501329	chr16	59934140	-	cg25501329		OpenSea	LOC101927580	NR_110917	Body	IL6L10F	1.43794	0.504586	2.68765	0	0	7.01176	2.80582	10.8206	0.002	0.00245079
cg25501329	chr16	59934140	-	cg25501329		OpenSea	LOC101927580	NR_110917	Body	TNFR2L10F	1.76844	0.737492	3.15872	0	0	6.87946	2.92923	10.4887	0	0
cg08732950	chr16	89023389	+	cg08732950		OpenSea	CBFA2T3	NM_005187	Body	CRPL10F	4.36395	2.08638	7.40219	0	0	9.86454	2.0517	17.3525	0.008	0.0090217
cg08732950	chr16	89023389	+	cg08732950		OpenSea	CBFA2T3	NM_005187	Body	IL6L10F	3.39274	1.30733	6.08772	0	0	10.5555	2.39534	18.3464	0.016	0.0174112
cg08732950	chr16	89023389	+	cg08732950		OpenSea	CBFA2T3	NM_005187	Body	TNFR2L10F	4.58952	2.18617	7.70122	0	0	9.99564	1.67558	18.3233	0.014	0.0153212
cg17108423	chr6	170559792	-	cg17108423		OpenSea				CRPL10F	4.55829	2.34894	7.18388	0	0	7.93492	1.12716	14.5751	0.012	0.0132289
cg17108423	chr6	170559792	-	cg17108423		OpenSea				IL6L10F	3.03229	1.15334	5.42671	0.002	0.00727322	9.33647	2.71986	16.161	0.004	0.00469301
cg17108423	chr6	170559792	-	cg17108423		OpenSea				TNFR2L10F	3.94164	1.7287	6.7398	0	0	8.69906	2.10964	15.9217	0.02	0.0215556
cg26344619	chr14	76046018	+	cg26344619	chr14:76044590-76045102	S_Shore	FLVCR2	NM_017791	Body	CRPL10F	-7.16073	-11.4005	-3.71967	0	0	-11.9018	-21.4276	-1.53557	0.028	0.029821
cg26344619	chr14	76046018	+	cg26344619	chr14:76044590-76045102	S_Shore	FLVCR2	NM_017791	Body	IL6L10F	-4.50185	-7.84828	-1.68114	0	0	-15.0366	-24.3102	-5.32386	0.004	0.00469301
cg26344619	chr14	76046018	+	cg26344619	chr14:76044590-76045102	S_Shore	FLVCR2	NM_017791	Body	TNFR2L10F	-6.08917	-10.1234	-2.5778	0.002	0.00727322	-12.9815	-22.4642	-2.78403	0.006	0.00684628
cg13827596	chr1	185298424	+	cg13827596		OpenSea	GS1-279B7.1	NR_038424	Body	CRPL10F	-2.74674	-4.82865	-0.902303	0	0	-5.66471	-11.7696	0.408401	0.068	0.070505
cg13827596	chr1	185298424	+	cg13827596		OpenSea	GS1-279B7.1	NR_038424	Body	IL1raL10F	-2.63471	-4.59437	-0.988694	0	0	-6.56815	-12.2071	-0.372886	0.04	0.0420708
cg15528722	chr5	40756846	+	cg15528722	chr5:40755537-40756257	S_Shore	TTC33	NM_012382	TSS1500	CRPL10F	-2.1858	-3.64321	-0.947507	0	0	-7.67919	-11.6609	-3.93928	0	0
cg15528722	chr5	40756846	+	cg15528722	chr5:40755537-40756257	S_Shore	TTC33	NM_012382	TSS1500	IL6L10F	-1.03075	-2.04387	-0.244787	0.008	0.0244802	-9.00349	-12.9262	-5.08902	0	0
cg15528722	chr5	40756846	+	cg15528722	chr5:40755537-40756257	S_Shore	TTC33	NM_012382	TSS1500	IL1raL10F	-1.38713	-2.67115	-0.40527	0	0	-8.61118	-12.4577	-4.93262	0	0
cg15528722	chr5	40756846	+	cg15528722	chr5:40755537-40756257	S_Shore	TTC33	NM_012382	TSS1500	TNFR2L10F	-1.75994	-3.25372	-0.640315	0.002	0.00727322	-8.29061	-12.2076	-4.48951	0	0
cg06097048	chr10	28848388	+	cg06097048		OpenSea	WAC;WAC;WAC	NM_016628;NM_100486;NM_100264	Body;Body;Body	CRPL10F	5.39073	2.53381	8.89003	0	0	9.59505	1.53054	18.3495	0.018	0.0195012
cg06097048	chr10	28848388	+	cg06097048		OpenSea	WAC;WAC;WAC	NM_016628;NM_100486;NM_100264	Body;Body;Body	IL6L10F	2.98773	1.02848	5.57079	0	0	12.3238	4.36022	19.974	0.002	0.00245079
cg06097048	chr10	28848388	+	cg06097048		OpenSea	WAC;WAC;WAC	NM_016628;NM_100486;NM_100264	Body;Body;Body	TNFR2L10F	4.35125	1.80809	7.70104	0	0	11.494	4.07025	19.6394	0.004	0.00469301
cg14104280	chr10	82363213	-	cg14104280		OpenSea	SH2D4B;SH2D4B	NM_207372;NM_001145719	Body;Body	CRPL10F	-2.66523	-4.39815	-1.37491	0	0	-7.23721	-11.0348	-3.62218	0	0
cg14104280	chr10	82363213	-	cg14104280		OpenSea	SH2D4B;SH2D4B	NM_207372;NM_001145719	Body;Body	IL6L10F	-1.28678	-2.54711	-0.41786	0	0	-8.5199	-12.4446	-4.66701	0	0
cg14104280	chr10	82363213	-	cg14104280		OpenSea	SH2D4B;SH2D4B	NM_207372;NM_001145719	Body;Body	IL1raL10F	-1.1749	-2.39695	-0.245002	0.01	0.0301226	-8.53209	-12.2094	-4.76959	0	0
cg14104280	chr10	82363213	-	cg14104280		OpenSea	SH2D4B;SH2D4B	NM_207372;NM_001145719	Body;Body	TNFR2L10F	-1.76207	-2.97043	-0.752292	0	0	-8.10267	-11.7784	-4.55678	0	0
cg19561181	chr20	56794558	-	cg19561181		OpenSea	ANKRD60	NM_001304369	Body	TNFR2L10F	-1.30501	-2.67288	-0.194604	0.012	0.0353974	-3.02933	-6.87295	1.03729	0.14	0.142855
cg12249789	chr21	45203404	+	cg12249789	chr21:45206579-45207051	N_Shelf				CRPL10F	-2.10287	-4.15893	-0.522587	0.006	0.0191179	-10.5495	-15.6738	-5.57658	0	0
cg12249789	chr21	45203404	+	cg12249789	chr21:45206579-45207051	N_Shelf				IL6L10F	-2.17259	-4.03579	-0.741409	0	0	-10.6184	-16.2107	-4.79579	0	0
cg12249789	chr21	45203404	+	cg12249789	chr21:45206579-45207051	N_Shelf				IL1raL10F	-2.18692	-4.10744	-0.800463	0.002	0.00727322	-11.0772	-17.0618	-5.05734	0.002	0.00245079
cg12249789	chr21	45203404	+	cg12249789	chr21:45206579-45207051	N_Shelf				TNFR2L10F	-3.0789	-5.07838	-1.38561	0	0	-9.90938	-15.4312	-4.12216	0	0
cg05859409	chr11	1799685	+	cg05859409		OpenSea				CRPL10F	-2.22681	-3.96921	-0.889498	0.002	0.00727322	-7.66439	-12.2248	-3.4961	0	0
cg05859409	chr11	1799685	+	cg05859409		OpenSea				IL6L10F	-1.66227	-3.05353	-0.599818	0.002	0.00727322	-8.28456	-12.3646	-3.9658	0	0
cg05859409	chr11	1799685	+	cg05859409		OpenSea				IL1raL10F	-1.62404	-3.07407	-0.465592	0.006	0.0191179	-8.45032	-13.164	-3.87933	0	0
cg05859409	chr11	1799685	+	cg05859409		OpenSea				TNFR2L10F	-1.93167	-3.51586	-0.776924	0	0	-7.86627	-12.4653	-2.95169	0	0
cg16060189	chr10	94350577	+	cg16060189	chr10:94351356-94351615	N_Shore				CRPL10F	2.41218	0.7466	4.53718	0.006	0.0191179	2.96625	-2.62552	8.48734	0.284	0.286867
cg04501408	chr5	141551033	-	cg04501408		OpenSea				IL6L10F	-1.64195	-3.42537	-0.303135	0.016	0.0456034	-13.8214	-20.2352	-7.44647	0	0
cg01589514	chr17	79526378	-	cg01589514		OpenSea	NPLOC4;NPLOC4;NPLOC4	NR_130140;NR_130139;NM_017921	Body;Body;Body	CRPL10F	4.48943	2.1657	7.16266	0	0	8.59842	1.11849	16.073	0.022	0.023617
cg01589514	chr17	79526378	-	cg01589514		OpenSea	NPLOC4;NPLOC4;NPLOC4	NR_130140;NR_130139;NM_017921	Body;Body;Body	IL6L10F	2.7174	0.969706	4.91883	0	0	10.0809	2.18183	17.2714	0.008	0.0090217
cg01589514	chr17	79526378	-	cg01589514		OpenSea	NPLOC4;NPLOC4;NPLOC4	NR_130140;NR_130139;NM_017921	Body;Body;Body	TNFR2L10F	3.28702	1.36943	5.75824	0	0	9.64538	2.26425	16.622	0.018	0.0195012
cg04874562	chr11	5462540	+	cg04874562		OpenSea	OR51I1	NM_001005288	1stExon	CRPL10F	2.96882	1.08181	5.34879	0.002	0.00727322	8.95105	2.49188	15.0124	0.002	0.00245079
cg04874562	chr11	5462540	+	cg04874562		OpenSea	OR51I1	NM_001005288	1stExon	IL6L10F	2.43038	0.918534	4.5709	0	0	9.73964	3.02776	16.3142	0.004	0.00469301
cg04874562	chr11	5462540	+	cg04874562		OpenSea	OR51I1	NM_001005288	1stExon	IL1raL10F	1.90824	0.411641	3.98393	0.014	0.0406753	10.3967	3.52818	16.3412	0	0
cg04874562	chr11	5462540	+	cg04874562		OpenSea	OR51I1	NM_001005288	1stExon	TNFR2L10F	3.4114	1.48009	5.78009	0	0	9.12898	2.44835	16.0289	0.008	0.0090217
cg18544034	chr2	8626420	-	cg18544034		OpenSea				CRPL10F	-2.64037	-4.37052	-1.18181	0	0	-8.78841	-13.5384	-3.8612	0	0
cg18544034	chr2	8626420	-	cg18544034		OpenSea				IL6L10F	-1.73838	-3.29306	-0.54459	0.002	0.00727322	-9.85784	-14.5495	-5.15198	0	0
cg18544034	chr2	8626420	-	cg18544034		OpenSea				TNFR2L10F	-2.40274	-4.01549	-0.981999	0	0	-9.03776	-13.5525	-3.93791	0	0
cg24418920	chr22	17709899	-	cg24418920		OpenSea				TNFR2L10F	-1.44922	-2.92232	-0.349949	0.008	0.0244802	-7.85863	-11.749	-3.2427	0	0
cg25198113	chr1	5743886	-	cg25198113		OpenSea				CRPL10F	5.65687	2.78217	9.1054	0	0	12.8366	4.00234	21.5925	0.006	0.00684628
cg25198113	chr1	5743886	-	cg25198113		OpenSea				IL6L10F	2.80722	0.838608	5.28772	0	0	15.5078	7.01886	23.8541	0	0
cg25198113	chr1	5743886	-	cg25198113		OpenSea				IL1raL10F	2.67922	0.586562	5.36613	0.014	0.0406753	16.2815	7.72601	24.906	0	0
cg25198113	chr1	5743886	-	cg25198113		OpenSea				TNFR2L10F	4.97583	2.17503	8.25272	0	0	13.591	5.02484	22.1374	0.006	0.00684628
cg11979298	chr3	101707603	+	cg11979298		OpenSea	LOC152225	NR_026934	Body	CRPL10F	-4.9037	-7.92273	-2.37975	0	0	-13.6921	-20.4406	-6.3353	0	0
cg11979298	chr3	101707603	+	cg11979298		OpenSea	LOC152225	NR_026934	Body	IL6L10F	-2.56749	-4.78844	-0.755503	0	0	-16.1804	-23.6559	-8.67308	0	0
cg11979298	chr3	101707603	+	cg11979298		OpenSea	LOC152225	NR_026934	Body	IL1raL10F	-2.30905	-4.55221	-0.528225	0.008	0.0244802	-16.716	-24.0245	-9.45544	0	0
cg11979298	chr3	101707603	+	cg11979298		OpenSea	LOC152225	NR_026934	Body	TNFR2L10F	-3.2235	-5.73585	-1.3449	0	0	-15.6892	-22.8436	-8.51335	0	0
cg12117418	chr1	29157255	+	cg12117418		OpenSea	OPRD1	NM_000911	Body	CRPL10F	-4.56213	-7.60519	-2.03289	0	0	-14.6753	-23.1033	-6.71839	0	0
cg12117418	chr1	29157255	+	cg12117418		OpenSea	OPRD1	NM_000911	Body	IL6L10F	-2.41802	-4.76898	-0.568545	0.002	0.00727322	-16.6258	-24.6633	-8.77286	0	0
cg15034393	chr3	152856773	-	cg15034393		OpenSea				CRPL10F	-2.11047	-3.56868	-0.905736	0	0	-6.68052	-10.3265	-2.98551	0	0
cg15034393	chr3	152856773	-	cg15034393		OpenSea				IL6L10F	-1.72797	-3.09774	-0.602631	0.002	0.00727322	-7.13103	-10.8466	-3.64299	0	0
cg15034393	chr3	152856773	-	cg15034393		OpenSea				TNFR2L10F	-1.77665	-3.11675	-0.755043	0	0	-6.90688	-10.4652	-3.10957	0	0
cg07443710	chr10	71206848	-	cg07443710		OpenSea				CRPL10F	-1.70795	-3.16307	-0.416359	0.004	0.0134261	-9.62613	-14.0066	-5.04273	0	0
cg07443710	chr10	71206848	-	cg07443710		OpenSea				TNFR2L10F	-2.35312	-4.14363	-1.01399	0	0	-8.95489	-13.2962	-4.28075	0	0
cg10608465	chr19	13892443	+	cg10608465		OpenSea				CRPL10F	-6.73597	-10.8974	-3.44808	0	0	-13.1322	-21.3907	-4.97701	0	0
cg10608465	chr19	13892443	+	cg10608465		OpenSea				IL6L10F	-2.83494	-5.33902	-0.975573	0	0	-17.2935	-24.9792	-9.38849	0	0
cg10608465	chr19	13892443	+	cg10608465		OpenSea				IL1raL10F	-3.50712	-6.30913	-1.3963	0	0	-16.2958	-24.3488	-8.58635	0	0
cg10608465	chr19	13892443	+	cg10608465		OpenSea				TNFR2L10F	-3.04601	-5.51786	-1.1162	0	0	-17.0201	-24.2672	-9.25833	0	0
cg15752247	chr1	85773559	-	cg15752247		OpenSea				CRPL10F	-2.30494	-4.63154	-0.339555	0.016	0.0456034	-12.4383	-19.0528	-5.73221	0	0
cg08951566	chr15	38122448	-	cg08951566		OpenSea				TNFR2L10F	-1.89839	-3.96276	-0.261673	0.016	0.0456034	-14.4864	-21.5869	-7.02961	0	0
cg00301390	chr17	16749537	+	cg00301390		OpenSea				IL6L10F	1.51198	0.260346	3.2262	0.008	0.0244802	3.45141	-2.60601	9.64916	0.28	0.282932
cg00301390	chr17	16749537	+	cg00301390		OpenSea				TNFR2L10F	2.2784	0.650974	4.26453	0	0	2.95716	-2.78992	8.55945	0.294	0.296857
cg09803092	chr15	91381597	+	cg09803092		OpenSea				CRPL10F	-2.74849	-4.41781	-1.31804	0	0	-8.2211	-12.4439	-3.74999	0	0
cg09803092	chr15	91381597	+	cg09803092		OpenSea				IL6L10F	-1.25776	-2.49967	-0.339879	0.002	0.00727322	-9.61491	-14.2934	-5.35134	0	0
cg09803092	chr15	91381597	+	cg09803092		OpenSea				IL1raL10F	-1.56988	-3.11391	-0.533226	0.004	0.0134261	-10.0823	-14.4251	-5.59702	0	0
cg09803092	chr15	91381597	+	cg09803092		OpenSea				TNFR2L10F	-1.71877	-3.16943	-0.644628	0	0	-9.55943	-14.0388	-4.89636	0	0
cg27218041	chr1	59953216	-	cg27218041		OpenSea	FGGY;FGGY;FGGY;FGGY	NM_018291;NM_001244714;NM_001113411;NR_103473	Body;Body;Body;Body	CRPL10F	4.2393	2.04404	6.83527	0	0	7.77767	0.850034	14.2881	0.026	0.0277676
cg27218041	chr1	59953216	-	cg27218041		OpenSea	FGGY;FGGY;FGGY;FGGY	NM_018291;NM_001244714;NM_001113411;NR_103473	Body;Body;Body;Body	IL6L10F	3.1162	1.16556	5.46053	0.002	0.00727322	8.43706	1.58495	15.3189	0.02	0.0215556
cg27218041	chr1	59953216	-	cg27218041		OpenSea	FGGY;FGGY;FGGY;FGGY	NM_018291;NM_001244714;NM_001113411;NR_103473	Body;Body;Body;Body	TNFR2L10F	4.03873	1.76519	6.88994	0	0	7.88844	1.23871	14.4674	0.014	0.0153212
cg01225452	chr4	48972831	-	cg01225452		OpenSea				CRPL10F	-3.65534	-6.14857	-1.61463	0	0	-8.5885	-15.0366	-2.08274	0.008	0.0090217
cg01225452	chr4	48972831	-	cg01225452		OpenSea				IL6L10F	-2.82183	-5.07088	-0.99214	0	0	-9.48307	-16.1356	-2.95272	0	0
cg01225452	chr4	48972831	-	cg01225452		OpenSea				TNFR2L10F	-3.05663	-5.34331	-1.24185	0	0	-9.1251	-15.671	-2.53442	0.006	0.00684628
cg22425699	chr5	82664317	-	cg22425699		OpenSea				CRPL10F	-1.64115	-2.6561	-0.849685	0	0	-4.00416	-6.2268	-1.73431	0	0
cg22425699	chr5	82664317	-	cg22425699		OpenSea				IL6L10F	-1.15491	-2.17544	-0.358216	0.002	0.00727322	-4.4302	-6.76739	-2.06234	0	0
cg22425699	chr5	82664317	-	cg22425699		OpenSea				IL1raL10F	-0.719027	-1.44964	-0.168446	0.004	0.0134261	-4.81223	-7.13161	-2.52224	0	0
cg22425699	chr5	82664317	-	cg22425699		OpenSea				TNFR2L10F	-1.45788	-2.48077	-0.512231	0	0	-4.12694	-6.40555	-1.98805	0	0
cg10243030	chr20	16156233	+	cg10243030		OpenSea				CRPL10F	1.29059	0.505574	2.22074	0	0	4.29056	1.48989	7.20679	0.002	0.00245079
cg10243030	chr20	16156233	+	cg10243030		OpenSea				IL6L10F	0.694371	0.118063	1.42107	0.01	0.0301226	4.87333	2.06654	7.70279	0	0
cg10243030	chr20	16156233	+	cg10243030		OpenSea				IL1raL10F	1.02398	0.351768	1.91043	0	0	4.67393	1.9543	7.33923	0.002	0.00245079
cg10243030	chr20	16156233	+	cg10243030		OpenSea				TNFR2L10F	1.01799	0.262205	1.95633	0.004	0.0134261	4.64717	1.87299	7.31942	0	0
cg25645302	chr16	67642367	+	cg25645302		OpenSea	CTCF;CTCF	NM_006565;NM_001191022	5'UTR;5'UTR	CRPL10F	-2.55062	-4.91137	-0.573659	0.008	0.0244802	-14.0172	-20.7644	-7.57021	0	0
cg25645302	chr16	67642367	+	cg25645302		OpenSea	CTCF;CTCF	NM_006565;NM_001191022	5'UTR;5'UTR	IL6L10F	-1.74803	-3.68444	-0.290446	0.016	0.0456034	-14.6342	-21.6007	-6.90211	0	0
cg23013812	chr6	14841030	+	cg23013812		OpenSea				CRPL10F	-1.62745	-2.95541	-0.43685	0.002	0.00727322	-4.33459	-8.16972	-0.477735	0.032	0.0339208
cg23013812	chr6	14841030	+	cg23013812		OpenSea				IL6L10F	-1.72705	-3.13777	-0.628507	0	0	-5.28217	-9.76572	-0.699672	0.01	0.0111331
cg23013812	chr6	14841030	+	cg23013812		OpenSea				TNFR2L10F	-2.05683	-3.46923	-0.922464	0	0	-4.15137	-8.01471	-0.312769	0.04	0.0420708
cg09154528	chr22	50154745	+	cg09154528	chr22:50157939-50158217	N_Shelf				CRPL10F	-3.10769	-5.19441	-1.42446	0	0	-9.9751	-15.6264	-3.91772	0.002	0.00245079
cg09154528	chr22	50154745	+	cg09154528	chr22:50157939-50158217	N_Shelf				IL6L10F	-1.74664	-3.46601	-0.533233	0	0	-11.4207	-17.3282	-5.98162	0	0
cg09154528	chr22	50154745	+	cg09154528	chr22:50157939-50158217	N_Shelf				TNFR2L10F	-2.53256	-4.44327	-0.991441	0	0	-10.7878	-15.6731	-5.60066	0	0
cg23879831	chr10	115478900	+	cg23879831		OpenSea	CASP7;CASP7;CASP7;CASP7;CASP7;CASP7;CASP7	NM_001267057;NM_033338;NM_033340;NM_001227;NM_001267056;NM_033339;NM_001267058	Body;Body;Body;Body;Body;Body;Body	TNFR2L10F	-2.65741	-5.11893	-0.909412	0	0	-11.0583	-17.9476	-3.67301	0	0
cg27142757	chr1	150573467	-	cg27142757		OpenSea				CRPL10F	-3.04396	-4.84434	-1.50696	0	0	-6.41661	-10.406	-2.42838	0.002	0.00245079
cg27142757	chr1	150573467	-	cg27142757		OpenSea				IL6L10F	-1.78154	-3.20039	-0.609815	0.002	0.00727322	-7.77834	-11.7823	-3.69472	0	0
cg27142757	chr1	150573467	-	cg27142757		OpenSea				IL1raL10F	-1.69502	-3.05664	-0.610862	0	0	-7.95908	-11.6421	-4.2047	0	0
cg27142757	chr1	150573467	-	cg27142757		OpenSea				TNFR2L10F	-1.65104	-2.88189	-0.706527	0	0	-8.05213	-12.0425	-3.9495	0	0
cg15177686	chr4	185828927	-	cg15177686		OpenSea				CRPL10F	-2.07123	-3.98222	-0.323252	0.016	0.0456034	-9.43091	-14.8982	-4.25828	0	0
cg15177686	chr4	185828927	-	cg15177686		OpenSea				IL1raL10F	-1.6759	-3.49907	-0.349023	0.012	0.0353974	-10.0574	-15.3768	-4.51435	0	0
cg15177686	chr4	185828927	-	cg15177686		OpenSea				TNFR2L10F	-2.38679	-4.23283	-0.89488	0	0	-9.46783	-15.0858	-4.08896	0	0
cg20263249	chr1	118176170	+	cg20263249		OpenSea				CRPL10F	-4.59885	-7.59861	-2.14002	0	0	-14.7326	-22.1015	-7.11056	0	0
cg20263249	chr1	118176170	+	cg20263249		OpenSea				IL6L10F	-2.57541	-4.91437	-0.7541	0.002	0.00727322	-17.2578	-24.4305	-9.879	0	0
cg20263249	chr1	118176170	+	cg20263249		OpenSea				IL1raL10F	-2.26903	-4.68468	-0.569552	0.002	0.00727322	-17.5639	-25.2858	-9.58316	0	0
cg20263249	chr1	118176170	+	cg20263249		OpenSea				TNFR2L10F	-3.47514	-5.77027	-1.31671	0	0	-15.9069	-23.5878	-8.2224	0	0
cg03216966	chr7	733282	-	cg03216966		OpenSea	PRKAR1B;PRKAR1B;PRKAR1B;PRKAR1B;PRKAR1B;PRKAR1B	NM_001164759;NM_001164762;NM_001164758;NM_001164760;NM_001164761;NM_002735	Body;Body;Body;Body;Body;Body	IL6L10F	-1.6929	-3.20173	-0.597355	0	0	-6.06186	-10.3791	-1.63627	0.006	0.00684628
cg03216966	chr7	733282	-	cg03216966		OpenSea	PRKAR1B;PRKAR1B;PRKAR1B;PRKAR1B;PRKAR1B;PRKAR1B	NM_001164759;NM_001164762;NM_001164758;NM_001164760;NM_001164761;NM_002735	Body;Body;Body;Body;Body;Body	TNFR2L10F	-1.90526	-3.45134	-0.757725	0	0	-5.75961	-10.1595	-1.76945	0	0
cg24687529	chr1	117529954	+	cg24687529		OpenSea	PTGFRN	NM_020440	3'UTR	CRPL10F	1.82551	0.719519	3.17204	0	0	2.70693	-1.24045	6.56466	0.146	0.148809
cg24687529	chr1	117529954	+	cg24687529		OpenSea	PTGFRN	NM_020440	3'UTR	IL6L10F	1.30914	0.487415	2.3775	0	0	3.39148	-0.351357	7.14357	0.074	0.0766084
cg24687529	chr1	117529954	+	cg24687529		OpenSea	PTGFRN	NM_020440	3'UTR	IL1raL10F	1.76127	0.713453	3.05066	0	0	3.07249	-0.809344	6.77001	0.126	0.128813
cg24687529	chr1	117529954	+	cg24687529		OpenSea	PTGFRN	NM_020440	3'UTR	TNFR2L10F	2.26264	1.04453	3.8526	0	0	2.71201	-0.974656	6.45734	0.162	0.16493
cg15413523	chr5	133451625	-	cg15413523	chr5:133449320-133451260	S_Shore	TCF7;TCF7;TCF7;TCF7;TCF7;TCF7;TCF7;TCF7;TCF7;TCF7	NM_213648;NM_001134852;NM_201632;NM_201633;NM_001134851;NM_201634;NM_001134851;NM_003202;NM_213648;NM_001134852	5'UTR;1stExon;5'UTR;5'UTR;1stExon;5'UTR;5'UTR;Body;1stExon;5'UTR	CRPL10F	5.3588	2.4261	9.03573	0	0	7.13933	-1.97706	16.9285	0.14	0.142855
cg15413523	chr5	133451625	-	cg15413523	chr5:133449320-133451260	S_Shore	TCF7;TCF7;TCF7;TCF7;TCF7;TCF7;TCF7;TCF7;TCF7;TCF7	NM_213648;NM_001134852;NM_201632;NM_201633;NM_001134851;NM_201634;NM_001134851;NM_003202;NM_213648;NM_001134852	5'UTR;1stExon;5'UTR;5'UTR;1stExon;5'UTR;5'UTR;Body;1stExon;5'UTR	IL6L10F	3.23797	1.21913	6.15297	0	0	8.94255	-1.06123	18.3683	0.084	0.0866621
cg06380030	chr14	65459268	-	cg06380030		OpenSea	FNTB;CHURC1-FNTB;CHURC1-FNTB	NM_002028;NM_001202559;NM_001202558	Body;Body;Body	CRPL10F	-2.06104	-3.51394	-0.789046	0	0	-8.60912	-13.3355	-4.07151	0	0
cg06380030	chr14	65459268	-	cg06380030		OpenSea	FNTB;CHURC1-FNTB;CHURC1-FNTB	NM_002028;NM_001202559;NM_001202558	Body;Body;Body	IL6L10F	-1.25956	-2.57083	-0.307468	0.006	0.0191179	-9.6481	-14.2342	-5.60323	0	0
cg06380030	chr14	65459268	-	cg06380030		OpenSea	FNTB;CHURC1-FNTB;CHURC1-FNTB	NM_002028;NM_001202559;NM_001202558	Body;Body;Body	IL1raL10F	-1.6175	-3.06896	-0.472014	0.002	0.00727322	-8.95728	-13.6301	-4.62428	0	0
cg26543033	chr7	150056200	-	cg26543033		OpenSea				CRPL10F	-2.64585	-5.15238	-0.514552	0.01	0.0301226	-18.808	-25.771	-11.4539	0	0
cg26543033	chr7	150056200	-	cg26543033		OpenSea				IL1raL10F	-2.65252	-5.06863	-0.843099	0.004	0.0134261	-19.0649	-26.3962	-11.6547	0	0
cg26543033	chr7	150056200	-	cg26543033		OpenSea				TNFR2L10F	-2.59318	-5.17212	-0.792458	0	0	-19.1645	-26.1156	-11.6477	0	0
cg11731280	chr9	140066934	-	cg11731280	chr9:140068792-140069082	N_Shore	TMEM210	NM_001282477	TSS1500	CRPL10F	2.30566	0.786029	4.04347	0	0	6.97841	2.07956	12.0282	0.004	0.00469301
cg11731280	chr9	140066934	-	cg11731280	chr9:140068792-140069082	N_Shore	TMEM210	NM_001282477	TSS1500	IL6L10F	1.52808	0.357372	2.9214	0.004	0.0134261	7.58362	2.73195	12.5841	0.004	0.00469301
cg11731280	chr9	140066934	-	cg11731280	chr9:140068792-140069082	N_Shore	TMEM210	NM_001282477	TSS1500	IL1raL10F	1.45372	0.206325	2.9515	0.016	0.0456034	8.42697	3.13263	13.2569	0.002	0.00245079
cg11731280	chr9	140066934	-	cg11731280	chr9:140068792-140069082	N_Shore	TMEM210	NM_001282477	TSS1500	TNFR2L10F	2.86445	1.2567	4.8462	0	0	6.78159	1.49357	11.8124	0.01	0.0111331
cg05829046	chr7	2557446	+	cg05829046	chr7:2558371-2559967	N_Shore	LFNG;LFNG	NM_001166355;NM_002304	Body;TSS200	CRPL10F	-2.23556	-4.51626	-0.47664	0.01	0.0301226	-12.5365	-18.5094	-6.56821	0	0
cg21506763	chr3	38060329	-	cg21506763		OpenSea	PLCD1;PLCD1;PLCD1	NR_024071;NM_001130964;NM_006225	Body;Body;Body	CRPL10F	5.21614	2.7357	8.40995	0	0	10.7192	3.75985	17.7415	0.002	0.00245079
cg21506763	chr3	38060329	-	cg21506763		OpenSea	PLCD1;PLCD1;PLCD1	NR_024071;NM_001130964;NM_006225	Body;Body;Body	IL6L10F	3.45849	0.92335	6.23914	0.008	0.0244802	12.6215	5.52904	19.6406	0	0
cg21506763	chr3	38060329	-	cg21506763		OpenSea	PLCD1;PLCD1;PLCD1	NR_024071;NM_001130964;NM_006225	Body;Body;Body	IL1raL10F	2.56509	0.928628	4.92426	0.002	0.00727322	13.6156	7.17352	19.4358	0	0
cg21506763	chr3	38060329	-	cg21506763		OpenSea	PLCD1;PLCD1;PLCD1	NR_024071;NM_001130964;NM_006225	Body;Body;Body	TNFR2L10F	3.89169	1.74599	6.58797	0	0	12.1804	5.52728	19.2041	0	0
cg27206232	chr13	103264306	-	cg27206232		OpenSea	TPP2	NM_003291	Body	CRPL10F	3.75619	1.88749	6.08694	0	0	7.59249	2.44878	12.8144	0.006	0.00684628
cg27206232	chr13	103264306	-	cg27206232		OpenSea	TPP2	NM_003291	Body	IL6L10F	2.52754	0.984308	4.6755	0	0	8.64724	3.0076	13.8582	0.002	0.00245079
cg27206232	chr13	103264306	-	cg27206232		OpenSea	TPP2	NM_003291	Body	IL1raL10F	1.63459	0.321038	3.30988	0.01	0.0301226	9.51402	4.36148	14.5777	0	0
cg27206232	chr13	103264306	-	cg27206232		OpenSea	TPP2	NM_003291	Body	TNFR2L10F	3.07782	1.31736	5.28953	0	0	7.94511	2.78395	13.5194	0.002	0.00245079
cg10773266	chr10	43895225	+	cg10773266	chr10:43891546-43892917	S_Shelf	HNRNPF;HNRNPF;HNRNPF;HNRNPF	NM_001098205;NM_001098206;NM_001098204;NM_004966	5'UTR;5'UTR;5'UTR;5'UTR	CRPL10F	-3.41254	-5.88164	-1.60955	0	0	-9.16067	-15.0647	-2.80979	0	0
cg10773266	chr10	43895225	+	cg10773266	chr10:43891546-43892917	S_Shelf	HNRNPF;HNRNPF;HNRNPF;HNRNPF	NM_001098205;NM_001098206;NM_001098204;NM_004966	5'UTR;5'UTR;5'UTR;5'UTR	IL6L10F	-2.57148	-4.62708	-0.918605	0	0	-10.8334	-17.1667	-4.58227	0	0
cg10773266	chr10	43895225	+	cg10773266	chr10:43891546-43892917	S_Shelf	HNRNPF;HNRNPF;HNRNPF;HNRNPF	NM_001098205;NM_001098206;NM_001098204;NM_004966	5'UTR;5'UTR;5'UTR;5'UTR	IL1raL10F	-2.13688	-4.21213	-0.593941	0.008	0.0244802	-10.5389	-16.2515	-3.85691	0.002	0.00245079
cg10773266	chr10	43895225	+	cg10773266	chr10:43891546-43892917	S_Shelf	HNRNPF;HNRNPF;HNRNPF;HNRNPF	NM_001098205;NM_001098206;NM_001098204;NM_004966	5'UTR;5'UTR;5'UTR;5'UTR	TNFR2L10F	-3.76528	-6.42289	-1.68279	0	0	-8.96228	-15.0529	-2.88987	0.004	0.00469301
cg05092891	chr21	37535885	-	cg05092891		OpenSea	DOPEY2	NM_005128	TSS1500	IL6L10F	-1.38593	-2.8734	-0.217255	0.012	0.0353974	-8.30999	-12.8965	-3.6623	0	0
cg05092891	chr21	37535885	-	cg05092891		OpenSea	DOPEY2	NM_005128	TSS1500	IL1raL10F	-1.47761	-2.94	-0.301713	0.012	0.0353974	-8.32173	-13.0581	-3.40305	0	0
cg05092891	chr21	37535885	-	cg05092891		OpenSea	DOPEY2	NM_005128	TSS1500	TNFR2L10F	-2.1566	-3.83015	-0.867612	0	0	-7.80886	-12.6683	-2.5214	0	0
cg05316065	chr8	130799007	-	cg05316065		OpenSea	GSDMC;GSDMC	NM_031415;NM_031415	1stExon;5'UTR	CRPL10F	-4.87364	-7.9159	-2.27011	0	0	-14.7188	-21.7287	-7.61376	0	0
cg05316065	chr8	130799007	-	cg05316065		OpenSea	GSDMC;GSDMC	NM_031415;NM_031415	1stExon;5'UTR	IL6L10F	-2.82216	-5.21312	-0.89412	0.006	0.0191179	-17.1338	-24.1914	-10.3019	0	0
cg05316065	chr8	130799007	-	cg05316065		OpenSea	GSDMC;GSDMC	NM_031415;NM_031415	1stExon;5'UTR	IL1raL10F	-2.85548	-5.16377	-0.942868	0	0	-16.9699	-23.7105	-9.86746	0	0
cg05316065	chr8	130799007	-	cg05316065		OpenSea	GSDMC;GSDMC	NM_031415;NM_031415	1stExon;5'UTR	TNFR2L10F	-3.7162	-6.51908	-1.35308	0	0	-16.2036	-23.46	-9.41726	0	0
cg12170419	chr20	23367377	+	cg12170419		OpenSea	NAPB;NAPB;NAPB;NAPB;NAPB	NR_104266;NM_001283026;NM_022080;NM_001283018;NM_001283020	Body;Body;Body;Body;Body	CRPL10F	-2.69317	-4.42247	-1.32568	0.002	0.00727322	-7.61182	-11.4585	-3.51172	0	0
cg12170419	chr20	23367377	+	cg12170419		OpenSea	NAPB;NAPB;NAPB;NAPB;NAPB	NR_104266;NM_001283026;NM_022080;NM_001283018;NM_001283020	Body;Body;Body;Body;Body	IL6L10F	-1.38206	-2.67106	-0.440971	0	0	-8.90942	-12.8724	-5.11123	0	0
cg12170419	chr20	23367377	+	cg12170419		OpenSea	NAPB;NAPB;NAPB;NAPB;NAPB	NR_104266;NM_001283026;NM_022080;NM_001283018;NM_001283020	Body;Body;Body;Body;Body	IL1raL10F	-1.73551	-3.02096	-0.682465	0	0	-8.56804	-12.4584	-4.84588	0	0
cg12170419	chr20	23367377	+	cg12170419		OpenSea	NAPB;NAPB;NAPB;NAPB;NAPB	NR_104266;NM_001283026;NM_022080;NM_001283018;NM_001283020	Body;Body;Body;Body;Body	TNFR2L10F	-1.92527	-3.33904	-0.783391	0	0	-8.38854	-12.3694	-4.47199	0	0
cg02156526	chr6	24934269	-	cg02156526		OpenSea	FAM65B;FAM65B	NM_001286445;NM_001286446	Body;Body	CRPL10F	-3.18264	-5.06543	-1.53625	0	0	-6.99495	-11.8328	-2.20898	0.006	0.00684628
cg02156526	chr6	24934269	-	cg02156526		OpenSea	FAM65B;FAM65B	NM_001286445;NM_001286446	Body;Body	IL6L10F	-1.64497	-3.11962	-0.549285	0	0	-8.67145	-13.341	-4.10511	0	0
cg02156526	chr6	24934269	-	cg02156526		OpenSea	FAM65B;FAM65B	NM_001286445;NM_001286446	Body;Body	TNFR2L10F	-1.92153	-3.52448	-0.576588	0.006	0.0191179	-8.22372	-13.027	-3.44287	0	0
cg10241823	chr17	841205	+	cg10241823		OpenSea	NXN	NM_022463	Body	CRPL10F	4.7219	2.44248	7.76692	0	0	7.39193	-0.142385	14.6022	0.054	0.0563569
cg10241823	chr17	841205	+	cg10241823		OpenSea	NXN	NM_022463	Body	IL6L10F	3.06514	1.10692	5.37008	0	0	8.67134	1.5357	15.7899	0.016	0.0174112
cg10241823	chr17	841205	+	cg10241823		OpenSea	NXN	NM_022463	Body	TNFR2L10F	3.3322	1.30279	5.95432	0.002	0.00727322	8.87743	1.89704	15.5847	0.02	0.0215556
cg24899334	chr3	167803450	+	cg24899334		OpenSea	GOLIM4;GOLIM4	NM_014498;NM_001308155	Body;Body	CRPL10F	-1.40018	-2.24774	-0.64287	0	0	-4.06424	-6.52278	-1.93845	0.004	0.00469301
cg24899334	chr3	167803450	+	cg24899334		OpenSea	GOLIM4;GOLIM4	NM_014498;NM_001308155	Body;Body	IL6L10F	-1.08867	-1.9937	-0.368853	0	0	-4.29549	-6.81488	-1.9399	0	0
cg24899334	chr3	167803450	+	cg24899334		OpenSea	GOLIM4;GOLIM4	NM_014498;NM_001308155	Body;Body	TNFR2L10F	-1.37198	-2.21015	-0.615535	0	0	-3.99416	-6.1989	-1.66715	0	0
cg20644928	chr5	168418639	-	cg20644928		OpenSea	SLIT3;SLIT3	NM_003062;NM_001271946	Body;Body	CRPL10F	-4.47536	-8.06066	-1.45136	0.004	0.0134261	-18.5167	-29.5076	-7.83688	0.002	0.00245079
cg08001199	chr2	65058570	+	cg08001199		OpenSea				CRPL10F	-2.16683	-3.60948	-0.920061	0	0	-8.62508	-12.5459	-4.77107	0	0
cg08001199	chr2	65058570	+	cg08001199		OpenSea				IL6L10F	-1.26224	-2.43843	-0.391767	0	0	-9.56623	-13.5697	-5.71162	0	0
cg08001199	chr2	65058570	+	cg08001199		OpenSea				TNFR2L10F	-2.08839	-3.60087	-0.898204	0	0	-8.67137	-12.4556	-4.85379	0	0
cg01680062	chr21	36185960	-	cg01680062		OpenSea	RUNX1;RUNX1	NM_001001890;NM_001754	Body;Body	CRPL10F	-3.97193	-6.30984	-1.99466	0	0	-9.23162	-14.3134	-3.92965	0	0
cg01680062	chr21	36185960	-	cg01680062		OpenSea	RUNX1;RUNX1	NM_001001890;NM_001754	Body;Body	IL6L10F	-2.77152	-4.94062	-0.960221	0.004	0.0134261	-10.7453	-16.4558	-5.24034	0	0
cg01680062	chr21	36185960	-	cg01680062		OpenSea	RUNX1;RUNX1	NM_001001890;NM_001754	Body;Body	IL1raL10F	-2.25374	-4.12122	-0.833449	0	0	-11.7034	-16.9339	-6.09158	0	0
cg01680062	chr21	36185960	-	cg01680062		OpenSea	RUNX1;RUNX1	NM_001001890;NM_001754	Body;Body	TNFR2L10F	-3.29705	-5.68035	-1.35975	0	0	-10.0834	-15.8651	-4.67817	0	0
cg00218114	chr1	65157404	+	cg00218114		OpenSea	CACHD1;CACHD1	NM_001293274;NM_020925	3'UTR;3'UTR	CRPL10F	-2.41993	-4.18591	-1.0316	0	0	-8.7387	-13.3761	-4.36856	0	0
cg00218114	chr1	65157404	+	cg00218114		OpenSea	CACHD1;CACHD1	NM_001293274;NM_020925	3'UTR;3'UTR	IL6L10F	-1.4735	-2.86177	-0.405793	0.004	0.0134261	-9.39295	-14.045	-4.8923	0	0
cg00218114	chr1	65157404	+	cg00218114		OpenSea	CACHD1;CACHD1	NM_001293274;NM_020925	3'UTR;3'UTR	TNFR2L10F	-1.84702	-3.49442	-0.662504	0	0	-8.94869	-13.2602	-4.69615	0	0
cg25269438	chr2	26220838	+	cg25269438		OpenSea				TNFR2L10F	-1.92507	-3.58936	-0.635748	0	0	-9.27816	-14.3666	-4.44893	0	0
cg03504306	chr19	17326697	+	cg03504306	chr19:17326114-17326551	S_Shore	USE1	NM_018467	Body	CRPL10F	5.98663	2.81373	9.69026	0	0	13.9452	3.95344	23.8663	0.006	0.00684628
cg03504306	chr19	17326697	+	cg03504306	chr19:17326114-17326551	S_Shore	USE1	NM_018467	Body	IL6L10F	3.72571	1.29041	6.72035	0	0	16.2087	6.23697	26.0543	0	0
cg03504306	chr19	17326697	+	cg03504306	chr19:17326114-17326551	S_Shore	USE1	NM_018467	Body	IL1raL10F	4.12921	1.46764	7.54719	0.002	0.00727322	16.4544	6.49578	25.9887	0.002	0.00245079
cg03504306	chr19	17326697	+	cg03504306	chr19:17326114-17326551	S_Shore	USE1	NM_018467	Body	TNFR2L10F	4.95765	2.07862	8.5511	0	0	15.5408	5.55109	26.6688	0	0
cg14187619	chr2	239343111	+	cg14187619	chr2:239344401-239344627	N_Shore	ASB1	NM_001040445	Body	CRPL10F	-1.35212	-2.55985	-0.44094	0	0	-5.07298	-8.17906	-1.8503	0.004	0.00469301
cg14187619	chr2	239343111	+	cg14187619	chr2:239344401-239344627	N_Shore	ASB1	NM_001040445	Body	IL6L10F	-1.02599	-1.97946	-0.284465	0.002	0.00727322	-5.987	-9.45929	-2.84601	0	0
cg14187619	chr2	239343111	+	cg14187619	chr2:239344401-239344627	N_Shore	ASB1	NM_001040445	Body	IL1raL10F	-0.977372	-1.96059	-0.177021	0.012	0.0353974	-5.74479	-9.25183	-2.45385	0.002	0.00245079
cg14187619	chr2	239343111	+	cg14187619	chr2:239344401-239344627	N_Shore	ASB1	NM_001040445	Body	TNFR2L10F	-1.91911	-3.19929	-0.830195	0	0	-4.77115	-7.95928	-1.36356	0.004	0.00469301
cg04323816	chr22	40784430	+	cg04323816		OpenSea	SGSM3;SGSM3	NM_015705;NM_001301849	5'UTR;5'UTR	CRPL10F	6.98555	3.5851	11.1692	0	0	13.8428	4.14919	23.9378	0.004	0.00469301
cg04323816	chr22	40784430	+	cg04323816		OpenSea	SGSM3;SGSM3	NM_015705;NM_001301849	5'UTR;5'UTR	IL6L10F	4.75296	1.58857	8.45059	0	0	15.4776	4.79284	25.6291	0	0
cg04323816	chr22	40784430	+	cg04323816		OpenSea	SGSM3;SGSM3	NM_015705;NM_001301849	5'UTR;5'UTR	TNFR2L10F	5.17018	2.22277	9.02147	0	0	15.3692	5.31978	25.689	0.002	0.00245079
cg26365581	chr1	172243209	-	cg26365581		OpenSea	DNM3;DNM3	NM_001136127;NM_015569	Body;Body	CRPL10F	-2.17483	-3.64279	-0.9505	0.002	0.00727322	-7.10543	-11.0514	-3.00589	0	0
cg26365581	chr1	172243209	-	cg26365581		OpenSea	DNM3;DNM3	NM_001136127;NM_015569	Body;Body	IL6L10F	-1.7495	-3.23705	-0.517751	0.002	0.00727322	-7.62359	-11.5606	-3.86068	0	0
cg26365581	chr1	172243209	-	cg26365581		OpenSea	DNM3;DNM3	NM_001136127;NM_015569	Body;Body	IL1raL10F	-1.53961	-2.81364	-0.518626	0	0	-7.71928	-11.9057	-3.87432	0	0
cg26365581	chr1	172243209	-	cg26365581		OpenSea	DNM3;DNM3	NM_001136127;NM_015569	Body;Body	TNFR2L10F	-2.17224	-3.59029	-0.915247	0	0	-7.21423	-11.3969	-3.16715	0	0
cg17953136	chr2	20232577	-	cg17953136		OpenSea	LAPTM4A	NM_014713	3'UTR	CRPL10F	4.06132	2.04418	6.4291	0	0	7.42391	2.22893	12.7203	0.006	0.00684628
cg17953136	chr2	20232577	-	cg17953136		OpenSea	LAPTM4A	NM_014713	3'UTR	IL6L10F	2.60679	0.914233	4.61127	0.004	0.0134261	8.59596	3.36207	13.6705	0	0
cg17953136	chr2	20232577	-	cg17953136		OpenSea	LAPTM4A	NM_014713	3'UTR	IL1raL10F	1.97463	0.756131	3.67103	0	0	9.45103	4.28855	14.4067	0	0
cg17953136	chr2	20232577	-	cg17953136		OpenSea	LAPTM4A	NM_014713	3'UTR	TNFR2L10F	3.04243	1.35609	5.04584	0	0	8.33988	3.39931	13.5824	0.002	0.00245079
cg23305420	chr11	109948734	-	cg23305420		OpenSea				CRPL10F	-1.7702	-3.10943	-0.714969	0	0	-6.10439	-9.34611	-2.61806	0	0
cg23305420	chr11	109948734	-	cg23305420		OpenSea				IL6L10F	-0.939565	-1.95113	-0.202374	0.012	0.0353974	-6.93361	-10.2622	-3.53149	0	0
cg23305420	chr11	109948734	-	cg23305420		OpenSea				TNFR2L10F	-2.29372	-3.80986	-0.9977	0	0	-5.65714	-9.17044	-2.05552	0.004	0.00469301
cg15549550	chr2	11857010	-	cg15549550		OpenSea	LPIN1	NM_001261428	Body	CRPL10F	-4.62693	-7.59828	-2.31972	0	0	-10.2821	-16.0984	-4.63318	0.002	0.00245079
cg15549550	chr2	11857010	-	cg15549550		OpenSea	LPIN1	NM_001261428	Body	IL6L10F	-2.52276	-4.5968	-0.920577	0.002	0.00727322	-12.2773	-18.2103	-6.23865	0	0
cg15549550	chr2	11857010	-	cg15549550		OpenSea	LPIN1	NM_001261428	Body	IL1raL10F	-1.87598	-3.56979	-0.495929	0.004	0.0134261	-12.6898	-18.3835	-7.05595	0	0
cg15549550	chr2	11857010	-	cg15549550		OpenSea	LPIN1	NM_001261428	Body	TNFR2L10F	-2.6519	-4.74445	-1.052	0	0	-11.9474	-17.7869	-6.232	0	0
cg02293874	chr3	124408740	+	cg02293874		OpenSea	KALRN;KALRN	NM_001024660;NM_007064	Body;Body	CRPL10F	-2.00838	-3.96425	-0.434903	0.012	0.0353974	-9.30421	-15.0063	-3.41733	0	0
cg02293874	chr3	124408740	+	cg02293874		OpenSea	KALRN;KALRN	NM_001024660;NM_007064	Body;Body	IL6L10F	-2.24022	-4.03777	-0.846282	0	0	-9.33445	-15.0774	-3.48896	0	0
cg19382191	chr7	45200201	+	cg19382191	chr7:45197181-45197807	S_Shelf	RAMP3	NM_005856	Body	CRPL10F	3.08228	1.36083	5.27206	0	0	8.29069	2.4779	13.9475	0.008	0.0090217
cg19382191	chr7	45200201	+	cg19382191	chr7:45197181-45197807	S_Shelf	RAMP3	NM_005856	Body	IL6L10F	2.53299	0.913267	4.40245	0	0	8.99379	3.00509	15.1192	0	0
cg19382191	chr7	45200201	+	cg19382191	chr7:45197181-45197807	S_Shelf	RAMP3	NM_005856	Body	TNFR2L10F	3.2882	1.39945	5.68368	0	0	8.24896	2.50698	14.6392	0.006	0.00684628
cg20519581	chr20	48959844	-	cg20519581	chr20:48960164-48960373	N_Shore				CRPL10F	-2.84869	-4.57344	-1.37989	0	0	-7.32139	-11.1804	-3.43582	0	0
cg20519581	chr20	48959844	-	cg20519581	chr20:48960164-48960373	N_Shore				IL6L10F	-1.80595	-3.26115	-0.543719	0	0	-8.56257	-12.433	-4.71245	0	0
cg20519581	chr20	48959844	-	cg20519581	chr20:48960164-48960373	N_Shore				TNFR2L10F	-2.29853	-3.86952	-0.973751	0	0	-7.90835	-12.1573	-4.09677	0	0
cg16978321	chr19	5983811	+	cg16978321		OpenSea	LOC100128568	NR_046376	Body	CRPL10F	-2.4727	-4.10209	-1.14267	0	0	-7.87347	-11.7145	-4.08039	0	0
cg16978321	chr19	5983811	+	cg16978321		OpenSea	LOC100128568	NR_046376	Body	IL6L10F	-1.72565	-3.17741	-0.591541	0.002	0.00727322	-8.56211	-12.6278	-4.66104	0	0
cg16978321	chr19	5983811	+	cg16978321		OpenSea	LOC100128568	NR_046376	Body	IL1raL10F	-1.38473	-2.66143	-0.442834	0	0	-9.12912	-13.2633	-4.96898	0	0
cg16978321	chr19	5983811	+	cg16978321		OpenSea	LOC100128568	NR_046376	Body	TNFR2L10F	-2.20813	-3.68417	-0.833971	0	0	-8.1058	-12.0805	-4.19723	0	0
cg17562163	chr15	58777264	-	cg17562163		OpenSea	LOC101928694;LIPC	NR_120338;NM_000236	Body;Body	CRPL10F	-3.77047	-6.40075	-1.5685	0	0	-11.2267	-17.9421	-3.97286	0.004	0.00469301
cg17562163	chr15	58777264	-	cg17562163		OpenSea	LOC101928694;LIPC	NR_120338;NM_000236	Body;Body	IL6L10F	-2.28964	-4.37608	-0.717199	0.002	0.00727322	-13.2288	-20.4777	-6.12715	0	0
cg17562163	chr15	58777264	-	cg17562163		OpenSea	LOC101928694;LIPC	NR_120338;NM_000236	Body;Body	TNFR2L10F	-3.23869	-5.86263	-1.21071	0	0	-12.3259	-19.2237	-5.30237	0	0
cg00968118	chr22	43686187	-	cg00968118		OpenSea	SCUBE1	NM_173050	Body	CRPL10F	2.21987	0.514481	4.38177	0.008	0.0244802	9.76744	3.43465	16.023	0.002	0.00245079
cg00968118	chr22	43686187	-	cg00968118		OpenSea	SCUBE1	NM_173050	Body	IL6L10F	2.45293	0.803702	4.55331	0	0	9.77216	2.8514	16.3918	0.004	0.00469301
cg00968118	chr22	43686187	-	cg00968118		OpenSea	SCUBE1	NM_173050	Body	TNFR2L10F	3.94786	1.85172	6.61906	0	0	8.63119	2.32219	15.0392	0.004	0.00469301
cg22409916	chr7	138426100	+	cg22409916		OpenSea	ATP6V0A4;ATP6V0A4;ATP6V0A4	NM_130841;NM_130840;NM_020632	Body;Body;Body	IL6L10F	-1.20907	-2.18157	-0.412638	0	0	-4.2807	-7.72127	-0.823222	0.018	0.0195012
cg22409916	chr7	138426100	+	cg22409916		OpenSea	ATP6V0A4;ATP6V0A4;ATP6V0A4	NM_130841;NM_130840;NM_020632	Body;Body;Body	TNFR2L10F	-1.3157	-2.49132	-0.373329	0.002	0.00727322	-4.26042	-7.53172	-0.805065	0.016	0.0174112
cg19526722	chr1	89061160	-	cg19526722		OpenSea	PKN2-AS1	NR_110682	Body	CRPL10F	-2.80906	-4.62713	-1.37013	0	0	-7.74787	-11.9224	-3.77891	0	0
cg19526722	chr1	89061160	-	cg19526722		OpenSea	PKN2-AS1	NR_110682	Body	IL6L10F	-1.53762	-2.78918	-0.573678	0	0	-8.99963	-13.1558	-5.15313	0	0
cg19526722	chr1	89061160	-	cg19526722		OpenSea	PKN2-AS1	NR_110682	Body	TNFR2L10F	-1.58706	-2.98017	-0.567485	0	0	-8.86185	-13.0309	-4.83663	0	0
cg14954838	chr12	122293996	+	cg14954838		OpenSea	HPD;HPD	NM_001171993;NM_002150	Body;Body	CRPL10F	-1.65585	-2.93778	-0.628362	0	0	-5.49169	-9.2174	-2.07205	0.002	0.00245079
cg14954838	chr12	122293996	+	cg14954838		OpenSea	HPD;HPD	NM_001171993;NM_002150	Body;Body	TNFR2L10F	-1.23	-2.46303	-0.348775	0.002	0.00727322	-5.83402	-9.11776	-2.39767	0	0
cg16493813	chr8	17521952	-	cg16493813		OpenSea	MTUS1;MTUS1;MTUS1;MTUS1;MTUS1	NM_001001931;NM_001001925;NM_001166393;NM_001001924;NM_020749	Body;Body;Body;Body;Body	CRPL10F	-2.80648	-5.18984	-0.811301	0.004	0.0134261	-11.1088	-17.7501	-4.6071	0	0
cg16493813	chr8	17521952	-	cg16493813		OpenSea	MTUS1;MTUS1;MTUS1;MTUS1;MTUS1	NM_001001931;NM_001001925;NM_001166393;NM_001001924;NM_020749	Body;Body;Body;Body;Body	IL6L10F	-2.11708	-4.12902	-0.58013	0.002	0.00727322	-11.9094	-19.5474	-5.66649	0	0
cg08960443	chr9	140066947	-	cg08960443	chr9:140068792-140069082	N_Shore	TMEM210	NM_001282477	TSS1500	CRPL10F	1.92372	0.681036	3.57784	0.008	0.0244802	5.81506	1.02447	10.4887	0.02	0.0215556
cg08960443	chr9	140066947	-	cg08960443	chr9:140068792-140069082	N_Shore	TMEM210	NM_001282477	TSS1500	IL6L10F	1.24143	0.299704	2.55217	0.014	0.0406753	6.41824	1.82992	11.0572	0.006	0.00684628
cg08960443	chr9	140066947	-	cg08960443	chr9:140068792-140069082	N_Shore	TMEM210	NM_001282477	TSS1500	IL1raL10F	1.52016	0.263559	2.935	0.012	0.0353974	6.87231	2.11785	11.5059	0.002	0.00245079
cg08960443	chr9	140066947	-	cg08960443	chr9:140068792-140069082	N_Shore	TMEM210	NM_001282477	TSS1500	TNFR2L10F	2.54813	1.11732	4.25415	0	0	5.78286	1.16084	10.7786	0.014	0.0153212
cg13827209	chr9	101912842	+	cg13827209		OpenSea	TGFBR1;TGFBR1	NM_001130916;NM_004612	3'UTR;3'UTR	CRPL10F	1.44417	0.491524	2.55634	0.004	0.0134261	5.61686	2.39638	8.68875	0.002	0.00245079
cg13827209	chr9	101912842	+	cg13827209		OpenSea	TGFBR1;TGFBR1	NM_001130916;NM_004612	3'UTR;3'UTR	IL6L10F	1.38164	0.480612	2.55464	0	0	5.58788	2.28057	8.66128	0	0
cg13827209	chr9	101912842	+	cg13827209		OpenSea	TGFBR1;TGFBR1	NM_001130916;NM_004612	3'UTR;3'UTR	TNFR2L10F	1.74366	0.777898	2.97389	0	0	5.3577	2.17638	8.6195	0.002	0.00245079
cg09897881	chr15	86195808	+	cg09897881		OpenSea	AKAP13;AKAP13;AKAP13	NM_007200;NM_006738;NM_001270546	Body;Body;Body	CRPL10F	-4.48077	-7.01538	-2.2608	0	0	-9.32054	-15.319	-3.25694	0	0
cg09897881	chr15	86195808	+	cg09897881		OpenSea	AKAP13;AKAP13;AKAP13	NM_007200;NM_006738;NM_001270546	Body;Body;Body	IL6L10F	-2.73913	-4.95154	-0.890883	0	0	-11.1275	-16.8852	-5.16006	0	0
cg09897881	chr15	86195808	+	cg09897881		OpenSea	AKAP13;AKAP13;AKAP13	NM_007200;NM_006738;NM_001270546	Body;Body;Body	IL1raL10F	-3.27202	-5.67893	-1.42137	0	0	-10.6781	-16.3941	-4.93849	0	0
cg09897881	chr15	86195808	+	cg09897881		OpenSea	AKAP13;AKAP13;AKAP13	NM_007200;NM_006738;NM_001270546	Body;Body;Body	TNFR2L10F	-2.97748	-4.98404	-1.231	0	0	-10.8323	-16.5521	-5.40531	0	0
cg09298159	chr6	153302566	-	cg09298159	chr6:153303408-153304973	N_Shore	FBXO5;FBXO5	NM_012177;NM_001142522	Body;5'UTR	CRPL10F	-2.01512	-3.25936	-0.988594	0	0	-5.58826	-8.91579	-2.32847	0	0
cg09298159	chr6	153302566	-	cg09298159	chr6:153303408-153304973	N_Shore	FBXO5;FBXO5	NM_012177;NM_001142522	Body;5'UTR	IL6L10F	-1.5359	-2.74243	-0.549318	0.002	0.00727322	-5.81838	-9.21073	-2.30028	0	0
cg09298159	chr6	153302566	-	cg09298159	chr6:153303408-153304973	N_Shore	FBXO5;FBXO5	NM_012177;NM_001142522	Body;5'UTR	TNFR2L10F	-2.26765	-3.691	-0.920878	0.002	0.00727322	-4.95979	-8.16642	-1.35323	0.006	0.00684628
cg24572048	chr11	126041925	+	cg24572048		OpenSea				CRPL10F	-2.64177	-4.92342	-0.807528	0.006	0.0191179	-8.59372	-15.0749	-2.33602	0.01	0.0111331
cg04797496	chr5	141339086	+	cg04797496		OpenSea	PCDH12	NM_016580	TSS1500	CRPL10F	-3.24872	-5.72235	-0.96267	0	0	-12.5102	-19.5498	-5.4565	0.002	0.00245079
cg04797496	chr5	141339086	+	cg04797496		OpenSea	PCDH12	NM_016580	TSS1500	IL6L10F	-2.56436	-4.95762	-0.83991	0	0	-13.4984	-21.2352	-6.3514	0.002	0.00245079
cg04797496	chr5	141339086	+	cg04797496		OpenSea	PCDH12	NM_016580	TSS1500	IL1raL10F	-2.6529	-5.06885	-0.702499	0.004	0.0134261	-12.5209	-19.699	-5.41843	0	0
cg02287483	chr8	105848201	-	cg02287483		OpenSea				CRPL10F	-3.0515	-5.41398	-1.13734	0	0	-11.3651	-17.3462	-5.21902	0.002	0.00245079
cg02287483	chr8	105848201	-	cg02287483		OpenSea				IL6L10F	-1.75382	-3.62227	-0.382767	0.006	0.0191179	-12.6805	-18.6725	-6.95696	0	0
cg02287483	chr8	105848201	-	cg02287483		OpenSea				TNFR2L10F	-1.81371	-3.7361	-0.386414	0.006	0.0191179	-12.6931	-19.1728	-6.64231	0	0
cg17668435	chr3	171866136	+	cg17668435		OpenSea	FNDC3B;FNDC3B	NM_022763;NM_001135095	Body;Body	CRPL10F	-3.22185	-5.98419	-0.993653	0.002	0.00727322	-14.8179	-22.172	-6.90851	0	0
cg17668435	chr3	171866136	+	cg17668435		OpenSea	FNDC3B;FNDC3B	NM_022763;NM_001135095	Body;Body	IL6L10F	-2.20384	-4.48606	-0.545708	0.004	0.0134261	-16.5275	-24.2873	-8.69793	0	0
cg17668435	chr3	171866136	+	cg17668435		OpenSea	FNDC3B;FNDC3B	NM_022763;NM_001135095	Body;Body	IL1raL10F	-2.32422	-4.68817	-0.501666	0.012	0.0353974	-15.7101	-22.9145	-8.27811	0	0
cg17668435	chr3	171866136	+	cg17668435		OpenSea	FNDC3B;FNDC3B	NM_022763;NM_001135095	Body;Body	TNFR2L10F	-2.65166	-5.02757	-0.917103	0.002	0.00727322	-15.5136	-23.4279	-8.0443	0	0
cg24796548	chr10	108785434	+	cg24796548		OpenSea	SORCS1;SORCS1;SORCS1;SORCS1;SORCS1;SORCS1	NM_001013031;NM_001206570;NM_052918;NM_001206572;NM_001206569;NM_001206571	Body;Body;Body;Body;Body;Body	CRPL10F	-2.34695	-4.1224	-0.906386	0	0	-7.43076	-12.3854	-2.80442	0.002	0.00245079
cg24796548	chr10	108785434	+	cg24796548		OpenSea	SORCS1;SORCS1;SORCS1;SORCS1;SORCS1;SORCS1	NM_001013031;NM_001206570;NM_052918;NM_001206572;NM_001206569;NM_001206571	Body;Body;Body;Body;Body;Body	IL6L10F	-1.36609	-2.6919	-0.34348	0.002	0.00727322	-8.85743	-13.5151	-3.89653	0.002	0.00245079
cg24796548	chr10	108785434	+	cg24796548		OpenSea	SORCS1;SORCS1;SORCS1;SORCS1;SORCS1;SORCS1	NM_001013031;NM_001206570;NM_052918;NM_001206572;NM_001206569;NM_001206571	Body;Body;Body;Body;Body;Body	TNFR2L10F	-2.05085	-3.70557	-0.759041	0	0	-8.23528	-12.9235	-3.40751	0	0
cg24274865	chr1	206946595	-	cg24274865		OpenSea	IL10	NM_000572	TSS1500	CRPL10F	-2.04984	-3.89382	-0.407123	0.01	0.0301226	-8.36118	-13.599	-3.04639	0.004	0.00469301
cg24274865	chr1	206946595	-	cg24274865		OpenSea	IL10	NM_000572	TSS1500	IL6L10F	-1.83073	-3.57379	-0.531009	0.002	0.00727322	-8.17213	-14.0698	-2.83629	0.002	0.00245079
cg05331214	chr2	167343774	+	cg05331214		OpenSea	SCN7A	NM_002976	TSS1500	TNFR2L10F	-1.69935	-3.35445	-0.368285	0.008	0.0244802	-9.1056	-13.9629	-4.2074	0.002	0.00245079
cg13646708	chr11	102447295	+	cg13646708		OpenSea				IL6L10F	-0.884449	-1.72398	-0.244215	0	0	-5.12592	-8.20484	-2.14229	0	0
cg13646708	chr11	102447295	+	cg13646708		OpenSea				TNFR2L10F	-1.65702	-2.79799	-0.701655	0	0	-4.48236	-7.57335	-1.50241	0.01	0.0111331
cg18563886	chr10	135203102	-	cg18563886	chr10:135203101-135203316	Island	PAOX;PAOX;PAOX	NM_207128;NM_152911;NM_207127	Body;Body;3'UTR	CRPL10F	1.42697	0.399269	2.61306	0.008	0.0244802	2.1927	-1.02208	5.51173	0.202	0.205189
cg20320863	chr12	89575415	-	cg20320863		OpenSea				CRPL10F	-1.68381	-3.06522	-0.514758	0.002	0.00727322	-7.8624	-11.6971	-3.6441	0	0
cg20320863	chr12	89575415	-	cg20320863		OpenSea				IL6L10F	-1.55973	-2.84737	-0.596773	0	0	-8.0481	-12.1044	-3.99471	0	0
cg20320863	chr12	89575415	-	cg20320863		OpenSea				TNFR2L10F	-1.89827	-3.25962	-0.832572	0	0	-7.70529	-11.5682	-3.78157	0	0
cg03047995	chr14	24601588	+	cg03047995	chr14:24601498-24601700	Island	FITM1	NM_203402	Body	CRPL10F	2.99117	1.11709	5.43882	0.002	0.00727322	11.1466	4.9147	17.7841	0	0
cg03047995	chr14	24601588	+	cg03047995	chr14:24601498-24601700	Island	FITM1	NM_203402	Body	IL6L10F	2.08046	0.637897	3.97525	0	0	11.9286	4.93083	18.6978	0	0
cg03047995	chr14	24601588	+	cg03047995	chr14:24601498-24601700	Island	FITM1	NM_203402	Body	IL1raL10F	2.54273	0.827176	4.72306	0	0	12.3725	5.77116	19.9933	0	0
cg24207009	chr17	76037562	-	cg24207009	chr17:76037074-76037323	S_Shore	TNRC6C;TNRC6C	NM_018996;NM_001142640	5'UTR;5'UTR	CRPL10F	1.72376	0.794193	2.87445	0	0	4.06353	1.0422	7.22828	0.012	0.0132289
cg24207009	chr17	76037562	-	cg24207009	chr17:76037074-76037323	S_Shore	TNRC6C;TNRC6C	NM_018996;NM_001142640	5'UTR;5'UTR	IL6L10F	1.09554	0.372802	2.16588	0	0	4.5472	1.16568	7.86697	0.01	0.0111331
cg24207009	chr17	76037562	-	cg24207009	chr17:76037074-76037323	S_Shore	TNRC6C;TNRC6C	NM_018996;NM_001142640	5'UTR;5'UTR	TNFR2L10F	1.86292	0.825554	3.09535	0	0	4.08863	1.02082	7.24706	0.008	0.0090217
cg19082218	chr2	8815947	-	cg19082218	chr2:8816314-8817264	N_Shore	ID2-AS1	NR_110154	Body	IL1raL10F	-1.42545	-2.8883	-0.212198	0.016	0.0456034	-9.76581	-14.5876	-5.08618	0	0
cg19082218	chr2	8815947	-	cg19082218	chr2:8816314-8817264	N_Shore	ID2-AS1	NR_110154	Body	TNFR2L10F	-1.94374	-3.47536	-0.723109	0	0	-8.70841	-13.5835	-3.88343	0	0
cg09062752	chr9	71443046	-	cg09062752		OpenSea	PIP5K1B;PIP5K1B	NM_003558;NM_001278253	Body;Body	CRPL10F	-1.92444	-3.77764	-0.383378	0.006	0.0191179	-9.75896	-14.599	-4.5723	0	0
cg09062752	chr9	71443046	-	cg09062752		OpenSea	PIP5K1B;PIP5K1B	NM_003558;NM_001278253	Body;Body	IL6L10F	-1.70596	-3.41866	-0.48263	0	0	-10.2484	-15.9654	-5.18568	0	0
cg09062752	chr9	71443046	-	cg09062752		OpenSea	PIP5K1B;PIP5K1B	NM_003558;NM_001278253	Body;Body	TNFR2L10F	-2.69534	-4.76441	-1.17894	0	0	-9.35774	-14.6248	-4.01785	0	0
cg06618497	chr14	102198604	-	cg06618497		OpenSea	C14orf72	NR_026774	Body	CRPL10F	-4.82344	-7.87614	-2.26639	0	0	-12.0107	-20.5302	-3.97339	0.002	0.00245079
cg06618497	chr14	102198604	-	cg06618497		OpenSea	C14orf72	NR_026774	Body	IL6L10F	-3.32633	-6.02411	-1.24693	0	0	-13.9243	-21.8204	-5.9561	0	0
cg06618497	chr14	102198604	-	cg06618497		OpenSea	C14orf72	NR_026774	Body	IL1raL10F	-3.65057	-6.45504	-1.52693	0	0	-12.674	-20.1419	-5.13529	0	0
cg06618497	chr14	102198604	-	cg06618497		OpenSea	C14orf72	NR_026774	Body	TNFR2L10F	-3.6465	-6.36614	-1.43015	0.002	0.00727322	-13.2265	-20.8768	-5.5458	0	0
cg24016995	chr10	129868149	+	cg24016995		OpenSea	PTPRE;PTPRE	NM_130435;NM_006504	Body;Body	CRPL10F	-2.28186	-4.27217	-0.716851	0.016	0.0456034	-10.0295	-15.6527	-4.40452	0	0
cg24016995	chr10	129868149	+	cg24016995		OpenSea	PTPRE;PTPRE	NM_130435;NM_006504	Body;Body	IL6L10F	-1.67635	-3.50705	-0.44054	0.002	0.00727322	-10.6015	-16.3467	-5.11034	0	0
cg24016995	chr10	129868149	+	cg24016995		OpenSea	PTPRE;PTPRE	NM_130435;NM_006504	Body;Body	TNFR2L10F	-2.51913	-4.52283	-0.972222	0	0	-9.81184	-15.1281	-3.70823	0.004	0.00469301
cg19163210	chr15	69599744	+	cg19163210		OpenSea	PAQR5	NM_017705	5'UTR	CRPL10F	5.32288	1.95332	9.92403	0	0	19.8109	7.47808	31.5788	0.002	0.00245079
cg19163210	chr15	69599744	+	cg19163210		OpenSea	PAQR5	NM_017705	5'UTR	IL6L10F	3.84931	0.898868	7.66734	0.002	0.00727322	21.6406	9.29704	33.4873	0	0
cg19163210	chr15	69599744	+	cg19163210		OpenSea	PAQR5	NM_017705	5'UTR	TNFR2L10F	4.99324	1.94925	8.90217	0	0	20.5771	9.15334	31.8743	0.002	0.00245079
cg20991997	chr11	113844406	+	cg20991997		OpenSea	HTR3A;HTR3A;HTR3A	NM_213621;NM_000869;NR_046363	TSS1500;TSS1500;TSS1500	CRPL10F	1.78632	0.408788	3.37161	0.01	0.0301226	6.90846	2.09056	11.6426	0.004	0.00469301
cg20991997	chr11	113844406	+	cg20991997		OpenSea	HTR3A;HTR3A;HTR3A	NM_213621;NM_000869;NR_046363	TSS1500;TSS1500;TSS1500	IL6L10F	1.37957	0.309864	2.82559	0.008	0.0244802	7.28117	2.25406	11.9763	0.006	0.00684628
cg20991997	chr11	113844406	+	cg20991997		OpenSea	HTR3A;HTR3A;HTR3A	NM_213621;NM_000869;NR_046363	TSS1500;TSS1500;TSS1500	TNFR2L10F	2.95447	1.35609	4.92025	0	0	5.77416	1.23942	10.561	0.018	0.0195012
cg26456810	chr17	42002103	+	cg26456810		OpenSea				CRPL10F	-5.10935	-9.20592	-2.10839	0	0	-18.4355	-28.5879	-7.85059	0	0
cg26456810	chr17	42002103	+	cg26456810		OpenSea				IL6L10F	-3.06015	-6.1741	-0.775667	0.002	0.00727322	-21.5326	-31.3519	-11.4716	0	0
cg26456810	chr17	42002103	+	cg26456810		OpenSea				TNFR2L10F	-4.00338	-7.43247	-1.3839	0	0	-19.346	-29.1504	-8.86035	0	0
cg22830707	chr12	54332181	-	cg22830707	chr12:54332805-54333731	N_Shore	HOXC13	NM_017410	TSS1500	IL6L10F	3.23488	0.93456	6.01465	0.002	0.00727322	12.9829	2.63253	22.8345	0.012	0.0132289
cg13316148	chr2	191916269	+	cg13316148		OpenSea	STAT4	NM_003151	Body	CRPL10F	-2.173	-3.53355	-1.05526	0	0	-5.81428	-9.15523	-2.23938	0.006	0.00684628
cg13316148	chr2	191916269	+	cg13316148		OpenSea	STAT4	NM_003151	Body	IL6L10F	-1.49466	-2.7533	-0.534681	0.004	0.0134261	-6.68754	-9.86226	-3.29479	0	0
cg13316148	chr2	191916269	+	cg13316148		OpenSea	STAT4	NM_003151	Body	IL1raL10F	-1.2291	-2.23271	-0.403284	0.004	0.0134261	-6.86816	-10.3045	-3.66608	0	0
cg13316148	chr2	191916269	+	cg13316148		OpenSea	STAT4	NM_003151	Body	TNFR2L10F	-2.11615	-3.5787	-0.771328	0.002	0.00727322	-5.92664	-9.26484	-2.28593	0.002	0.00245079
cg03356288	chr13	74639083	-	cg03356288		OpenSea	KLF12	NM_007249	5'UTR	CRPL10F	-4.52256	-7.71641	-1.85854	0	0	-17.4225	-26.3709	-8.18915	0	0
cg03356288	chr13	74639083	-	cg03356288		OpenSea	KLF12	NM_007249	5'UTR	IL6L10F	-3.2929	-5.9388	-1.08739	0	0	-18.4094	-27.4126	-9.40131	0	0
cg03356288	chr13	74639083	-	cg03356288		OpenSea	KLF12	NM_007249	5'UTR	TNFR2L10F	-3.20354	-5.98722	-0.995216	0.002	0.00727322	-17.8942	-26.109	-8.79421	0	0
cg20127419	chr1	112289991	-	cg20127419		OpenSea	FAM212B-AS1;FAM212B-AS1;FAM212B;LOC101928718	NR_038952;NR_038951;NM_198926;NR_125963	Body;Body;Body;Body	CRPL10F	-3.03627	-5.10678	-1.2675	0	0	-9.47755	-14.7885	-4.30054	0.002	0.00245079
cg20127419	chr1	112289991	-	cg20127419		OpenSea	FAM212B-AS1;FAM212B-AS1;FAM212B;LOC101928718	NR_038952;NR_038951;NM_198926;NR_125963	Body;Body;Body;Body	IL6L10F	-2.15219	-4.002	-0.684472	0.002	0.00727322	-10.6157	-15.9661	-5.25815	0	0
cg20127419	chr1	112289991	-	cg20127419		OpenSea	FAM212B-AS1;FAM212B-AS1;FAM212B;LOC101928718	NR_038952;NR_038951;NM_198926;NR_125963	Body;Body;Body;Body	TNFR2L10F	-2.07613	-3.88698	-0.614862	0.006	0.0191179	-10.5194	-15.6712	-5.08383	0.002	0.00245079
cg13257654	chr8	42946331	+	cg13257654	chr8:42948532-42948928	N_Shelf				CRPL10F	3.39699	1.35002	5.7975	0.002	0.00727322	12.6014	5.27775	19.8821	0	0
cg13257654	chr8	42946331	+	cg13257654	chr8:42948532-42948928	N_Shelf				IL6L10F	2.34491	0.73845	4.45766	0.002	0.00727322	13.4089	6.55015	20.8839	0	0
cg13257654	chr8	42946331	+	cg13257654	chr8:42948532-42948928	N_Shelf				TNFR2L10F	3.71986	1.53928	6.38347	0	0	12.4649	5.40065	20.0761	0	0
