# Supplementary material for: DNA methylation profiles of cancer-related fatigue associated with markers of inflammation and immunometabolism
Source: Research Square preprint supplement (doi:10.21203/rs.3.rs-3332488/v1), 2023-09-28
Supplement: Supplementary file 3 [file 492d5f9fbd5717d2dedd76bf.xlsx]

## Sheet: Sheet 1 - Supplemental Table 3 
Supplemental Table 3 CpG inflammatory markers FINAL
cpg	chr	pos	strand	Name	Islands_Name	Relation_to_Island	UCSC_RefGene_Name	UCSC_RefGene_Accession	UCSC_RefGene_Group	inflaMarker	betaLMM	pvLMM	fdrLMM
cg14216476	chr3	129636326	+	cg14216476		OpenSea				CRPL10F	0.351209	4.03e-18	1.09e-14
cg26416615	chr10	63751843	+	cg26416615		OpenSea	ARID5B	NM_032199	Body	CRPL10F	-0.423358	1.05e-17	1.42e-14
cg26416615	chr10	63751843	+	cg26416615		OpenSea	ARID5B	NM_032199	Body	IL6L10F	-0.737442	4.28e-16	3.85e-13
cg19822755	chr16	30108259	-	cg19822755	chr16:30107511-30107875	S_Shore	YPEL3;YPEL3	NM_031477;NM_001145524	TSS1500;TSS1500	CRPL10F	0.304606	1.33e-15	8.96e-13
cg14216476	chr3	129636326	+	cg14216476		OpenSea				IL6L10F	0.579489	6.1e-15	3.3e-12
cg19822755	chr16	30108259	-	cg19822755	chr16:30107511-30107875	S_Shore	YPEL3;YPEL3	NM_031477;NM_001145524	TSS1500;TSS1500	IL6L10F	0.521621	6.88e-14	3.1e-11
cg20995564	chr2	145172035	-	cg20995564		OpenSea	ZEB2;ZEB2	NM_014795;NM_001171653	Body;Body	CRPL10F	-0.646705	1.35e-13	4.69e-11
cg10608465	chr19	13892443	+	cg10608465		OpenSea				CRPL10F	-0.142908	1.39e-13	4.69e-11
cg04415310	chr12	124743637	+	cg04415310		OpenSea	ZNF664-FAM101A	NM_001204299	5'UTR	TNFR2L10F	1.29899	3.6e-13	1.08e-10
cg12992827	chr3	101901234	+	cg12992827		OpenSea				CRPL10F	-0.348436	5.37e-13	1.45e-10
cg09298159	chr6	153302566	-	cg09298159	chr6:153303408-153304973	N_Shore	FBXO5;FBXO5	NM_012177;NM_001142522	Body;5'UTR	TNFR2L10F	-1.14631	1.43e-12	3.52e-10
cg19821297	chr19	12890029	-	cg19821297	chr19:12889083-12889343	S_Shore				CRPL10F	-0.201542	2.63e-12	5.93e-10
cg16531578	chr6	42370098	-	cg16531578		OpenSea	TRERF1;TRERF1	NM_033502;NM_001297573	5'UTR;5'UTR	CRPL10F	-0.51202	3.91e-12	8.12e-10
cg13178755	chr2	174023580	-	cg13178755		OpenSea	ZAK;ZAK	NM_133646;NM_016653	Body;Body	IL6L10F	-0.68454	4.6e-12	8.88e-10
cg00159243	chr12	109023799	-	cg00159243		OpenSea	SELPLG	NM_003006	5'UTR	IL6L10F	-0.334601	5.44e-12	9.81e-10
cg20995564	chr2	145172035	-	cg20995564		OpenSea	ZEB2;ZEB2	NM_014795;NM_001171653	Body;Body	IL6L10F	-1.10316	1.19e-11	2.01e-09
cg15549550	chr2	11857010	-	cg15549550		OpenSea	LPIN1	NM_001261428	Body	CRPL10F	-0.177363	1.28e-11	2.04e-09
cg12800932	chr7	158611626	+	cg12800932		OpenSea	ESYT2	NM_020728	Body	TNFR2L10F	-1.70755	1.53e-11	2.3e-09
cg13178755	chr2	174023580	-	cg13178755		OpenSea	ZAK;ZAK	NM_133646;NM_016653	Body;Body	CRPL10F	-0.360001	1.75e-11	2.49e-09
cg10636246	chr1	159046973	+	cg10636246		OpenSea	AIM2	NM_004833	TSS1500	CRPL10F	-0.37237	3.94e-11	5.33e-09
cg06019998	chr17	15845440	-	cg06019998	chr17:15847757-15849513	N_Shelf				CRPL10F	-0.405533	4.97e-11	6.4e-09
cg19821297	chr19	12890029	-	cg19821297	chr19:12889083-12889343	S_Shore				TNFR2L10F	-0.659261	5.51e-11	6.77e-09
cg16531578	chr6	42370098	-	cg16531578		OpenSea	TRERF1;TRERF1	NM_033502;NM_001297573	5'UTR;5'UTR	IL6L10F	-0.877464	9.87e-11	1.16e-08
cg04231870	chr11	65618874	-	cg04231870		OpenSea	SNX32;SNX32	NM_152760;NM_152760	ExonBnd;Body	CRPL10F	-0.197785	1.22e-10	1.37e-08
cg16669300	chr9	134882463	-	cg16669300		OpenSea	MED27;MED27	NM_004269;NM_001253881	Body;Body	CRPL10F	-0.231633	1.33e-10	1.44e-08
cg02695372	chr7	106320126	-	cg02695372		OpenSea				TNFR2L10F	-0.842881	1.44e-10	1.5e-08
cg06019998	chr17	15845440	-	cg06019998	chr17:15847757-15849513	N_Shelf				IL6L10F	-0.716766	1.7e-10	1.7e-08
cg26955383	chr10	105218660	-	cg26955383	chr10:105217966-105218287	S_Shore	CALHM1	NM_001001412	TSS200	IL6L10F	0.347918	1.76e-10	1.7e-08
cg24145401	chr1	159047177	-	cg24145401		OpenSea	AIM2	NM_004833	TSS1500	CRPL10F	-0.392921	2.13e-10	1.98e-08
cg16531578	chr6	42370098	-	cg16531578		OpenSea	TRERF1;TRERF1	NM_033502;NM_001297573	5'UTR;5'UTR	IL10L10F	-1.37957	2.2e-10	1.98e-08
cg12992827	chr3	101901234	+	cg12992827		OpenSea				TNFR2L10F	-1.07411	2.54e-10	2.07e-08
cg20228731	chr7	130646051	+	cg20228731		OpenSea	FLJ43663;FLJ43663	NR_015431;NR_024153	Body;Body	TNFR2L10F	-2.38831	2.4e-10	2.07e-08
cg03924136	chr20	62367108	-	cg03924136	chr20:62368955-62371962	N_Shore	LIME1;LIME1;LIME1;LIME1;ZGPAT;ZGPAT;ZGPAT;ZGPAT;ZGPAT	NM_017806;NM_001305655;NM_001305654;NM_001305654;NM_181485;NM_001195654;NM_001195653;NM_032527;NM_001083113	TSS1500;TSS1500;1stExon;5'UTR;Body;Body;Body;Body;Body	TNFR2L10F	0.803193	2.53e-10	2.07e-08
cg09897881	chr15	86195808	+	cg09897881		OpenSea	AKAP13;AKAP13;AKAP13	NM_007200;NM_006738;NM_001270546	Body;Body;Body	CRPL10F	-0.168089	2.6e-10	2.07e-08
cg16531578	chr6	42370098	-	cg16531578		OpenSea	TRERF1;TRERF1	NM_033502;NM_001297573	5'UTR;5'UTR	TNFR2L10F	-1.59301	3.15e-10	2.43e-08
cg12992827	chr3	101901234	+	cg12992827		OpenSea				IL6L10F	-0.550733	4.27e-10	3.21e-08
cg13316148	chr2	191916269	+	cg13316148		OpenSea	STAT4	NM_003151	Body	TNFR2L10F	-0.943861	5.06e-10	3.69e-08
cg17953136	chr2	20232577	-	cg17953136		OpenSea	LAPTM4A	NM_014713	3'UTR	IL10L10F	0.550574	5.24e-10	3.72e-08
cg00159243	chr12	109023799	-	cg00159243		OpenSea	SELPLG	NM_003006	5'UTR	TNFR2L10F	-0.559331	5.86e-10	3.96e-08
cg21506763	chr3	38060329	-	cg21506763		OpenSea	PLCD1;PLCD1;PLCD1	NR_024071;NM_001130964;NM_006225	Body;Body;Body	IL6L10F	0.254337	5.73e-10	3.96e-08
cg20995564	chr2	145172035	-	cg20995564		OpenSea	ZEB2;ZEB2	NM_014795;NM_001171653	Body;Body	IL10L10F	-1.61519	6.96e-10	4.47e-08
cg16431791	chr19	14783092	+	cg16431791		OpenSea	ADGRE3;ADGRE3;ADGRE3	NM_032571;NM_001289159;NM_001289158	Body;Body;Body	IL10L10F	0.616013	6.95e-10	4.47e-08
cg07225450	chr21	39592213	+	cg07225450		OpenSea				TNFR2L10F	-1.22962	7.26e-10	4.57e-08
cg22425699	chr5	82664317	-	cg22425699		OpenSea				IL10L10F	-1.18627	7.84e-10	4.82e-08
cg12644285	chr15	93570953	+	cg12644285		OpenSea	CHD2	NM_001271	3'UTR	CRPL10F	-0.168235	1.04e-09	6.08e-08
cg16961793	chr22	45624479	-	cg16961793		OpenSea	KIAA0930	NM_001009880	Body	CRPL10F	-0.200431	1.02e-09	6.08e-08
cg18442362	chr7	44677772	+	cg18442362		OpenSea	OGDH;OGDH;OGDH	NM_001003941;NM_001165036;NM_002541	Body;Body;Body	TNFR2L10F	-0.887553	1.12e-09	6.28e-08
cg26955383	chr10	105218660	-	cg26955383	chr10:105217966-105218287	S_Shore	CALHM1	NM_001001412	TSS200	IL10L10F	0.543502	1.1e-09	6.28e-08
cg14887853	chr6	139794538	-	cg14887853		OpenSea	LOC645434	NR_033919	Body	CRPL10F	-0.34228	1.16e-09	6.37e-08
cg00159243	chr12	109023799	-	cg00159243		OpenSea	SELPLG	NM_003006	5'UTR	CRPL10F	-0.160694	1.53e-09	8.08e-08
cg27310092	chr1	151945663	-	cg27310092		OpenSea				TNFR2L10F	-0.847334	1.51e-09	8.08e-08
cg26859083	chr3	55002054	-	cg26859083		OpenSea	LRTM1;CACNA2D3	NM_001304389;NM_018398	TSS1500;Body	IL6L10F	0.341214	1.59e-09	8.24e-08
cg20228731	chr7	130646051	+	cg20228731		OpenSea	FLJ43663;FLJ43663	NR_015431;NR_024153	Body;Body	IL10L10F	-1.87473	1.67e-09	8.5e-08
cg26416615	chr10	63751843	+	cg26416615		OpenSea	ARID5B	NM_032199	Body	TNFR2L10F	-1.02584	1.74e-09	8.61e-08
cg23305420	chr11	109948734	-	cg23305420		OpenSea				TNFR2L10F	-0.92123	1.75e-09	8.61e-08
cg05316065	chr8	130799007	-	cg05316065		OpenSea	GSDMC;GSDMC	NM_031415;NM_031415	1stExon;5'UTR	CRPL10F	-0.132047	1.8e-09	8.69e-08
cg14959425	chr7	20447707	+	cg14959425		OpenSea	ITGB8	NM_002214	Body	IL6L10F	-0.30438	2.03e-09	9.63e-08
cg04415310	chr12	124743637	+	cg04415310		OpenSea	ZNF664-FAM101A	NM_001204299	5'UTR	IL6L10F	0.547334	2.14e-09	9.99e-08
cg04331199	chr1	67227248	+	cg04331199		OpenSea	TCTEX1D1	NM_152665	Body	CRPL10F	-0.2082	2.41e-09	1.08e-07
cg22425699	chr5	82664317	-	cg22425699		OpenSea				TNFR2L10F	-1.33326	2.38e-09	1.08e-07
cg08549335	chr7	30387954	-	cg08549335		OpenSea	ZNRF2	NM_147128	Body	TNFR2L10F	-1.42188	2.77e-09	1.23e-07
cg20703242	chr1	230279135	+	cg20703242		OpenSea	GALNT2	NM_004481	Body	IL10L10F	0.324809	3.07e-09	1.34e-07
cg07225450	chr21	39592213	+	cg07225450		OpenSea				CRPL10F	-0.336971	3.17e-09	1.36e-07
cg17953136	chr2	20232577	-	cg17953136		OpenSea	LAPTM4A	NM_014713	3'UTR	CRPL10F	0.177888	3.31e-09	1.4e-07
cg12992827	chr3	101901234	+	cg12992827		OpenSea				IL1raL10F	-0.675288	3.69e-09	1.47e-07
cg24854225	chr1	185374534	+	cg24854225		OpenSea				CRPL10F	-0.228491	3.61e-09	1.47e-07
cg20995564	chr2	145172035	-	cg20995564		OpenSea	ZEB2;ZEB2	NM_014795;NM_001171653	Body;Body	TNFR2L10F	-1.7659	3.74e-09	1.47e-07
cg12800932	chr7	158611626	+	cg12800932		OpenSea	ESYT2	NM_020728	Body	IL10L10F	-1.27369	3.76e-09	1.47e-07
cg10834218	chr20	8053963	-	cg10834218		OpenSea				CRPL10F	-0.256905	3.66e-09	1.47e-07
cg08732950	chr16	89023389	+	cg08732950		OpenSea	CBFA2T3	NM_005187	Body	IL6L10F	0.18289	3.97e-09	1.53e-07
cg22895728	chr12	93531972	-	cg22895728		OpenSea	LOC643339	NR_040096	Body	CRPL10F	-0.197854	4.04e-09	1.54e-07
cg08074885	chr15	39746976	+	cg08074885		OpenSea				TNFR2L10F	-0.833467	4.51e-09	1.69e-07
cg22425699	chr5	82664317	-	cg22425699		OpenSea				IL6L10F	-0.702262	5.15e-09	1.91e-07
cg14216476	chr3	129636326	+	cg14216476		OpenSea				TNFR2L10F	0.827862	5.43e-09	1.98e-07
cg01680062	chr21	36185960	-	cg01680062		OpenSea	RUNX1;RUNX1	NM_001001890;NM_001754	Body;Body	IL6L10F	-0.292138	5.54e-09	2e-07
cg10834218	chr20	8053963	-	cg10834218		OpenSea				IL6L10F	-0.460936	5.83e-09	2.07e-07
cg05333174	chr22	43163057	+	cg05333174	chr22:43165947-43166287	N_Shelf				IL10L10F	0.693116	6.02e-09	2.11e-07
cg14887853	chr6	139794538	-	cg14887853		OpenSea	LOC645434	NR_033919	Body	IL10L10F	-0.967198	6.47e-09	2.24e-07
cg20703242	chr1	230279135	+	cg20703242		OpenSea	GALNT2	NM_004481	Body	TNFR2L10F	0.396602	7.06e-09	2.41e-07
cg11979298	chr3	101707603	+	cg11979298		OpenSea	LOC152225	NR_026934	Body	CRPL10F	-0.120648	7.67e-09	2.59e-07
cg17953136	chr2	20232577	-	cg17953136		OpenSea	LAPTM4A	NM_014713	3'UTR	TNFR2L10F	0.606942	7.85e-09	2.62e-07
cg04268643	chr17	76037239	+	cg04268643	chr17:76037074-76037323	Island	TNRC6C;TNRC6C	NM_018996;NM_001142640	5'UTR;5'UTR	IL10L10F	0.301054	8.57e-09	2.82e-07
cg05773425	chr1	16644480	+	cg05773425		OpenSea	FBXO42	NM_018994	5'UTR	TNFR2L10F	0.849412	9.24e-09	2.97e-07
cg20519581	chr20	48959844	-	cg20519581	chr20:48960164-48960373	N_Shore				TNFR2L10F	-0.726885	9.22e-09	2.97e-07
cg20228731	chr7	130646051	+	cg20228731		OpenSea	FLJ43663;FLJ43663	NR_015431;NR_024153	Body;Body	CRPL10F	-0.608621	9.55e-09	3.04e-07
cg24331727	chr11	16213327	-	cg24331727		OpenSea	SOX6;SOX6;SOX6;SOX6	NM_001145811;NM_033326;NM_017508;NM_001145819	Body;Body;Body;Body	TNFR2L10F	0.393909	9.77e-09	3.05e-07
cg27142757	chr1	150573467	-	cg27142757		OpenSea				CRPL10F	-0.217509	9.83e-09	3.05e-07
cg17321267	chr19	5669909	+	cg17321267		OpenSea				TNFR2L10F	0.778986	1.01e-08	3.11e-07
cg14009097	chr11	113905622	+	cg14009097	chr11:113906920-113907332	N_Shore				CRPL10F	0.102079	1.05e-08	3.19e-07
cg11104177	chr10	123605117	-	cg11104177		OpenSea	ATE1;ATE1;ATE1;ATE1;ATE1;ATE1	NR_110006;NM_001288734;NM_001288735;NM_007041;NM_001001976;NM_001288736	Body;Body;Body;Body;Body;Body	CRPL10F	-0.325627	1.07e-08	3.21e-07
cg20703242	chr1	230279135	+	cg20703242		OpenSea	GALNT2	NM_004481	Body	CRPL10F	0.10595	1.08e-08	3.22e-07
cg06433467	chr5	67730071	-	cg06433467		OpenSea				TNFR2L10F	-1.0563	1.11e-08	3.27e-07
cg21506763	chr3	38060329	-	cg21506763		OpenSea	PLCD1;PLCD1;PLCD1	NR_024071;NM_001130964;NM_006225	Body;Body;Body	CRPL10F	0.127999	1.13e-08	3.29e-07
cg12839166	chr11	5462320	+	cg12839166		OpenSea	OR51I1;OR51B5;OR51B5	NM_001005288;NR_038321;NM_001005567	1stExon;Body;5'UTR	TNFR2L10F	0.578194	1.19e-08	3.42e-07
cg10636246	chr1	159046973	+	cg10636246		OpenSea	AIM2	NM_004833	TSS1500	IL6L10F	-0.586751	1.24e-08	3.45e-07
cg18765405	chr5	134644263	-	cg18765405		OpenSea				TNFR2L10F	-0.65371	1.23e-08	3.45e-07
cg08074885	chr15	39746976	+	cg08074885		OpenSea				IL6L10F	-0.410064	1.21e-08	3.45e-07
cg16431791	chr19	14783092	+	cg16431791		OpenSea	ADGRE3;ADGRE3;ADGRE3	NM_032571;NM_001289159;NM_001289158	Body;Body;Body	CRPL10F	0.19521	1.36e-08	3.75e-07
cg05773425	chr1	16644480	+	cg05773425		OpenSea	FBXO42	NM_018994	5'UTR	IL10L10F	0.708809	1.39e-08	3.77e-07
cg26344619	chr14	76046018	+	cg26344619	chr14:76044590-76045102	S_Shore	FLVCR2	NM_017791	Body	TNFR2L10F	-0.316437	1.4e-08	3.77e-07
cg14009097	chr11	113905622	+	cg14009097	chr11:113906920-113907332	N_Shore				IL6L10F	0.18383	1.43e-08	3.84e-07
cg16218494	chr11	34426751	+	cg16218494		OpenSea				TNFR2L10F	-0.935263	1.54e-08	4.01e-07
cg14887853	chr6	139794538	-	cg14887853		OpenSea	LOC645434	NR_033919	Body	IL6L10F	-0.588957	1.52e-08	4.01e-07
cg14959425	chr7	20447707	+	cg14959425		OpenSea	ITGB8	NM_002214	Body	CRPL10F	-0.15761	1.53e-08	4.01e-07
cg26955383	chr10	105218660	-	cg26955383	chr10:105217966-105218287	S_Shore	CALHM1	NM_001001412	TSS200	CRPL10F	0.168466	1.56e-08	4.02e-07
cg06092244	chr2	48796151	-	cg06092244		OpenSea	STON1-GTF2A1L	NM_172311	TSS200	IL10L10F	-0.966613	1.63e-08	4.12e-07
cg20519581	chr20	48959844	-	cg20519581	chr20:48960164-48960373	N_Shore				CRPL10F	-0.21213	1.63e-08	4.12e-07
cg00968118	chr22	43686187	-	cg00968118		OpenSea	SCUBE1	NM_173050	Body	TNFR2L10F	0.48098	1.74e-08	4.34e-07
cg17953136	chr2	20232577	-	cg17953136		OpenSea	LAPTM4A	NM_014713	3'UTR	IL6L10F	0.307309	1.85e-08	4.6e-07
cg02392359	chr15	55572079	+	cg02392359		OpenSea	RAB27A	NM_183235	5'UTR	TNFR2L10F	-0.933403	1.93e-08	4.75e-07
cg16498856	chr3	141196360	+	cg16498856		OpenSea				TNFR2L10F	-0.741876	1.97e-08	4.81e-07
cg14009097	chr11	113905622	+	cg14009097	chr11:113906920-113907332	N_Shore				TNFR2L10F	0.348748	2.14e-08	5.16e-07
cg01015210	chr5	141475540	-	cg01015210		OpenSea				TNFR2L10F	-0.73495	2.24e-08	5.36e-07
cg04323816	chr22	40784430	+	cg04323816		OpenSea	SGSM3;SGSM3	NM_015705;NM_001301849	5'UTR;5'UTR	IL6L10F	0.15172	2.35e-08	5.58e-07
cg16161069	chr16	442770	-	cg16161069		OpenSea	LOC100134368	NR_024453	Body	IL10L10F	0.518957	2.44e-08	5.69e-07
cg08549335	chr7	30387954	-	cg08549335		OpenSea	ZNRF2	NM_147128	Body	IL6L10F	-0.694111	2.44e-08	5.69e-07
cg13178755	chr2	174023580	-	cg13178755		OpenSea	ZAK;ZAK	NM_133646;NM_016653	Body;Body	IL10L10F	-0.880761	2.5e-08	5.72e-07
cg26312071	chr15	90727783	+	cg26312071	chr15:90727879-90728570	N_Shore	SEMA4B	NM_020210	TSS1500	IL10L10F	-0.464051	2.51e-08	5.72e-07
cg12285003	chr20	61596335	+	cg12285003		OpenSea	SLC17A9;SLC17A9	NM_022082;NM_001302643	Body;Body	TNFR2L10F	0.491058	2.52e-08	5.72e-07
cg09897881	chr15	86195808	+	cg09897881		OpenSea	AKAP13;AKAP13;AKAP13	NM_007200;NM_006738;NM_001270546	Body;Body;Body	IL6L10F	-0.270773	2.75e-08	6.19e-07
cg22594985	chr5	153457958	-	cg22594985		OpenSea				IL10L10F	0.646253	2.79e-08	6.24e-07
cg27310092	chr1	151945663	-	cg27310092		OpenSea				CRPL10F	-0.220426	2.88e-08	6.39e-07
cg13178755	chr2	174023580	-	cg13178755		OpenSea	ZAK;ZAK	NM_133646;NM_016653	Body;Body	TNFR2L10F	-1.00344	2.92e-08	6.4e-07
cg11104177	chr10	123605117	-	cg11104177		OpenSea	ATE1;ATE1;ATE1;ATE1;ATE1;ATE1	NR_110006;NM_001288734;NM_001288735;NM_007041;NM_001001976;NM_001288736	Body;Body;Body;Body;Body;Body	TNFR2L10F	-1.11803	2.94e-08	6.4e-07
cg01297684	chr12	56069634	+	cg01297684		OpenSea				CRPL10F	-0.372304	3.37e-08	7.28e-07
cg02590484	chr17	38178658	-	cg02590484		OpenSea	MED24;MED24;MED24;MED24;MED24;MED24;MED24;MED24	NM_014815;NM_001267797;NM_001079518;NR_052017;NR_052017;NM_014815;NM_001267797;NM_001079518	ExonBnd;ExonBnd;ExonBnd;ExonBnd;Body;Body;Body;Body	TNFR2L10F	0.751585	3.42e-08	7.33e-07
cg13316148	chr2	191916269	+	cg13316148		OpenSea	STAT4	NM_003151	Body	IL10L10F	-0.724903	3.49e-08	7.43e-07
cg12992827	chr3	101901234	+	cg12992827		OpenSea				IL10L10F	-0.789804	3.63e-08	7.67e-07
cg18363226	chr7	132741882	+	cg18363226		OpenSea	CHCHD3	NM_017812	Body	CRPL10F	-0.180424	3.71e-08	7.78e-07
cg24145401	chr1	159047177	-	cg24145401		OpenSea	AIM2	NM_004833	TSS1500	IL6L10F	-0.61954	3.91e-08	8.13e-07
cg14887853	chr6	139794538	-	cg14887853		OpenSea	LOC645434	NR_033919	Body	TNFR2L10F	-1.03064	4.08e-08	8.41e-07
cg17108423	chr6	170559792	-	cg17108423		OpenSea				IL10L10F	0.363772	4.4e-08	9.01e-07
cg19805943	chr2	85933069	+	cg19805943		OpenSea				CRPL10F	-0.159822	4.48e-08	9.11e-07
cg20991997	chr11	113844406	+	cg20991997		OpenSea	HTR3A;HTR3A;HTR3A	NM_213621;NM_000869;NR_046363	TSS1500;TSS1500;TSS1500	TNFR2L10F	0.622254	4.62e-08	9.31e-07
cg14009097	chr11	113905622	+	cg14009097	chr11:113906920-113907332	N_Shore				IL10L10F	0.286771	4.66e-08	9.33e-07
cg01297684	chr12	56069634	+	cg01297684		OpenSea				IL6L10F	-0.677054	4.83e-08	9.52e-07
cg20248701	chr3	53868093	+	cg20248701		OpenSea	CHDH	NM_018397	5'UTR	TNFR2L10F	-0.615231	4.82e-08	9.52e-07
cg21186405	chr2	103335661	+	cg21186405		OpenSea	MFSD9	NM_032718	Body	CRPL10F	-0.211147	5.48e-08	1.07e-06
cg10834218	chr20	8053963	-	cg10834218		OpenSea				IL10L10F	-0.698683	5.53e-08	1.07e-06
cg01015210	chr5	141475540	-	cg01015210		OpenSea				IL10L10F	-0.612551	5.57e-08	1.07e-06
cg06092244	chr2	48796151	-	cg06092244		OpenSea	STON1-GTF2A1L	NM_172311	TSS200	TNFR2L10F	-1.12563	5.77e-08	1.11e-06
cg20519581	chr20	48959844	-	cg20519581	chr20:48960164-48960373	N_Shore				IL10L10F	-0.596387	5.96e-08	1.13e-06
cg19821297	chr19	12890029	-	cg19821297	chr19:12889083-12889343	S_Shore				IL6L10F	-0.286092	6.27e-08	1.18e-06
cg08928261	chr4	40240766	-	cg08928261		OpenSea	RHOH;RHOH;RHOH;RHOH;RHOH;RHOH;RHOH;RHOH;RHOH;RHOH;RHOH;RHOH	NM_001278368;NM_001278367;NM_001278366;NM_001278365;NM_001278364;NM_001278369;NM_004310;NM_001278363;NM_001278362;NM_001278361;NM_001278360;NM_001278359	5'UTR;5'UTR;5'UTR;5'UTR;5'UTR;5'UTR;5'UTR;5'UTR;5'UTR;5'UTR;5'UTR;5'UTR	CRPL10F	-0.20162	6.28e-08	1.18e-06
cg07138962	chr14	100035588	+	cg07138962		OpenSea	CCDC85C	NM_001144995	Body	IL10L10F	0.364228	6.52e-08	1.22e-06
cg14216476	chr3	129636326	+	cg14216476		OpenSea				IL10L10F	0.64663	6.7e-08	1.23e-06
cg01680062	chr21	36185960	-	cg01680062		OpenSea	RUNX1;RUNX1	NM_001001890;NM_001754	Body;Body	CRPL10F	-0.148472	6.71e-08	1.23e-06
cg10724186	chr6	160227462	+	cg10724186		OpenSea	PNLDC1;PNLDC1	NM_001271862;NM_173516	Body;Body	IL10L10F	-0.632826	6.93e-08	1.26e-06
cg27206232	chr13	103264306	-	cg27206232		OpenSea	TPP2	NM_003291	Body	TNFR2L10F	0.5408	6.96e-08	1.26e-06
cg08928261	chr4	40240766	-	cg08928261		OpenSea	RHOH;RHOH;RHOH;RHOH;RHOH;RHOH;RHOH;RHOH;RHOH;RHOH;RHOH;RHOH	NM_001278368;NM_001278367;NM_001278366;NM_001278365;NM_001278364;NM_001278369;NM_004310;NM_001278363;NM_001278362;NM_001278361;NM_001278360;NM_001278359	5'UTR;5'UTR;5'UTR;5'UTR;5'UTR;5'UTR;5'UTR;5'UTR;5'UTR;5'UTR;5'UTR;5'UTR	TNFR2L10F	-0.70178	7.24e-08	1.3e-06
cg20703242	chr1	230279135	+	cg20703242		OpenSea	GALNT2	NM_004481	Body	IL6L10F	0.178379	7.47e-08	1.33e-06
cg16498856	chr3	141196360	+	cg16498856		OpenSea				IL6L10F	-0.37778	7.51e-08	1.33e-06
cg26344619	chr14	76046018	+	cg26344619	chr14:76044590-76045102	S_Shore	FLVCR2	NM_017791	Body	CRPL10F	-0.0859274	7.66e-08	1.35e-06
cg20263249	chr1	118176170	+	cg20263249		OpenSea				IL10L10F	-0.310406	7.74e-08	1.36e-06
cg03924136	chr20	62367108	-	cg03924136	chr20:62368955-62371962	N_Shore	LIME1;LIME1;LIME1;LIME1;ZGPAT;ZGPAT;ZGPAT;ZGPAT;ZGPAT	NM_017806;NM_001305655;NM_001305654;NM_001305654;NM_181485;NM_001195654;NM_001195653;NM_032527;NM_001083113	TSS1500;TSS1500;1stExon;5'UTR;Body;Body;Body;Body;Body	IL6L10F	0.343797	7.9e-08	1.38e-06
cg16161069	chr16	442770	-	cg16161069		OpenSea	LOC100134368	NR_024453	Body	TNFR2L10F	0.637026	8.23e-08	1.42e-06
cg20519581	chr20	48959844	-	cg20519581	chr20:48960164-48960373	N_Shore				IL6L10F	-0.37139	8.22e-08	1.42e-06
cg24207009	chr17	76037562	-	cg24207009	chr17:76037074-76037323	S_Shore	TNRC6C;TNRC6C	NM_018996;NM_001142640	5'UTR;5'UTR	IL10L10F	0.729573	8.28e-08	1.42e-06
cg08001199	chr2	65058570	+	cg08001199		OpenSea				TNFR2L10F	-0.744253	8.35e-08	1.42e-06
cg08549335	chr7	30387954	-	cg08549335		OpenSea	ZNRF2	NM_147128	Body	IL10L10F	-1.08378	8.52e-08	1.44e-06
cg00568296	chr20	48675540	+	cg00568296		OpenSea				TNFR2L10F	0.427568	9.21e-08	1.53e-06
cg02695372	chr7	106320126	-	cg02695372		OpenSea				CRPL10F	-0.203081	9.24e-08	1.53e-06
cg09536564	chr1	221467746	-	cg09536564		OpenSea				TNFR2L10F	-0.536058	9.14e-08	1.53e-06
cg06527396	chr3	128959178	+	cg06527396		OpenSea				IL10L10F	-0.468272	9.38e-08	1.54e-06
cg21506763	chr3	38060329	-	cg21506763		OpenSea	PLCD1;PLCD1;PLCD1	NR_024071;NM_001130964;NM_006225	Body;Body;Body	IL10L10F	0.350681	9.36e-08	1.54e-06
cg24687529	chr1	117529954	+	cg24687529		OpenSea	PTGFRN	NM_020440	3'UTR	TNFR2L10F	0.631917	9.83e-08	1.6e-06
cg26365581	chr1	172243209	-	cg26365581		OpenSea	DNM3;DNM3	NM_001136127;NM_015569	Body;Body	TNFR2L10F	-0.692602	1.05e-07	1.69e-06
cg07225450	chr21	39592213	+	cg07225450		OpenSea				IL6L10F	-0.548611	1.07e-07	1.72e-06
cg27218041	chr1	59953216	-	cg27218041		OpenSea	FGGY;FGGY;FGGY;FGGY	NM_018291;NM_001244714;NM_001113411;NR_103473	Body;Body;Body;Body	TNFR2L10F	0.424111	1.07e-07	1.72e-06
cg05165365	chr11	48151361	+	cg05165365		OpenSea	PTPRJ;PTPRJ	NM_001098503;NM_002843	Body;Body	CRPL10F	-0.155774	1.1e-07	1.74e-06
cg13659875	chr8	9045074	+	cg13659875		OpenSea	LOC101929128	NR_125431	TSS1500	TNFR2L10F	-0.27388	1.11e-07	1.74e-06
cg22425699	chr5	82664317	-	cg22425699		OpenSea				CRPL10F	-0.346717	1.11e-07	1.74e-06
cg04415310	chr12	124743637	+	cg04415310		OpenSea	ZNF664-FAM101A	NM_001204299	5'UTR	CRPL10F	0.269608	1.14e-07	1.76e-06
cg16498856	chr3	141196360	+	cg16498856		OpenSea				IL10L10F	-0.601733	1.13e-07	1.76e-06
cg14104280	chr10	82363213	-	cg14104280		OpenSea	SH2D4B;SH2D4B	NM_207372;NM_001145719	Body;Body	CRPL10F	-0.21101	1.15e-07	1.77e-06
cg27218041	chr1	59953216	-	cg27218041		OpenSea	FGGY;FGGY;FGGY;FGGY	NM_018291;NM_001244714;NM_001113411;NR_103473	Body;Body;Body;Body	IL6L10F	0.203346	1.15e-07	1.77e-06
cg02392359	chr15	55572079	+	cg02392359		OpenSea	RAB27A	NM_183235	5'UTR	IL6L10F	-0.465936	1.16e-07	1.78e-06
cg04331199	chr1	67227248	+	cg04331199		OpenSea	TCTEX1D1	NM_152665	Body	IL6L10F	-0.342076	1.18e-07	1.8e-06
cg13163786	chr11	121411582	+	cg13163786		OpenSea	SORL1	NM_003105	Body	IL6L10F	-0.460656	1.2e-07	1.81e-06
cg22594985	chr5	153457958	-	cg22594985		OpenSea				TNFR2L10F	0.797229	1.21e-07	1.81e-06
cg16431791	chr19	14783092	+	cg16431791		OpenSea	ADGRE3;ADGRE3;ADGRE3	NM_032571;NM_001289159;NM_001289158	Body;Body;Body	IL6L10F	0.331237	1.21e-07	1.81e-06
cg17108423	chr6	170559792	-	cg17108423		OpenSea				CRPL10F	0.119977	1.25e-07	1.85e-06
cg06097048	chr10	28848388	+	cg06097048		OpenSea	WAC;WAC;WAC	NM_016628;NM_100486;NM_100264	Body;Body;Body	CRPL10F	0.091858	1.25e-07	1.85e-06
cg15034393	chr3	152856773	-	cg15034393		OpenSea				IL6L10F	-0.408071	1.39e-07	2.05e-06
cg26859083	chr3	55002054	-	cg26859083		OpenSea	LRTM1;CACNA2D3	NM_001304389;NM_018398	TSS1500;Body	TNFR2L10F	0.593295	1.42e-07	2.07e-06
cg18442362	chr7	44677772	+	cg18442362		OpenSea	OGDH;OGDH;OGDH	NM_001003941;NM_001165036;NM_002541	Body;Body;Body	IL6L10F	-0.41288	1.51e-07	2.19e-06
cg09803092	chr15	91381597	+	cg09803092		OpenSea				CRPL10F	-0.180303	1.57e-07	2.26e-06
cg09897881	chr15	86195808	+	cg09897881		OpenSea	AKAP13;AKAP13;AKAP13	NM_007200;NM_006738;NM_001270546	Body;Body;Body	IL1raL10F	-0.329986	1.57e-07	2.26e-06
cg14195992	chr8	48265917	-	cg14195992		OpenSea	KIAA0146	NM_001080394	Body	IL6L10F	-0.323976	1.69e-07	2.42e-06
cg11104177	chr10	123605117	-	cg11104177		OpenSea	ATE1;ATE1;ATE1;ATE1;ATE1;ATE1	NR_110006;NM_001288734;NM_001288735;NM_007041;NM_001001976;NM_001288736	Body;Body;Body;Body;Body;Body	IL10L10F	-0.87274	1.73e-07	2.46e-06
cg20248701	chr3	53868093	+	cg20248701		OpenSea	CHDH	NM_018397	5'UTR	IL6L10F	-0.31638	1.74e-07	2.46e-06
cg07865630	chr6	139794360	-	cg07865630		OpenSea	LOC645434	NR_033919	Body	CRPL10F	-0.289979	1.75e-07	2.46e-06
cg06750745	chr4	184181896	-	cg06750745		OpenSea	WWC2	NM_024949	Body	TNFR2L10F	-0.500057	1.76e-07	2.46e-06
cg16669300	chr9	134882463	-	cg16669300		OpenSea	MED27;MED27	NM_004269;NM_001253881	Body;Body	IL6L10F	-0.338874	1.84e-07	2.56e-06
cg03307560	chr16	28161100	-	cg03307560		OpenSea	XPO6;XPO6	NM_001270940;NM_015171	Body;Body	CRPL10F	-0.195133	1.92e-07	2.65e-06
cg10773266	chr10	43895225	+	cg10773266	chr10:43891546-43892917	S_Shelf	HNRNPF;HNRNPF;HNRNPF;HNRNPF	NM_001098205;NM_001098206;NM_001098204;NM_004966	5'UTR;5'UTR;5'UTR;5'UTR	TNFR2L10F	-0.449236	1.92e-07	2.65e-06
cg07225450	chr21	39592213	+	cg07225450		OpenSea				IL10L10F	-0.867259	1.96e-07	2.69e-06
cg17155829	chr19	7413575	-	cg17155829		OpenSea				IL10L10F	-0.452869	2.01e-07	2.75e-06
cg11642336	chr7	30329949	+	cg11642336		OpenSea	MIR550B1;ZNRF2	NR_037513;NM_147128	TSS1500;Body	IL10L10F	-0.469752	2.12e-07	2.84e-06
cg17321267	chr19	5669909	+	cg17321267		OpenSea				CRPL10F	0.183957	2.1e-07	2.84e-06
cg04323816	chr22	40784430	+	cg04323816		OpenSea	SGSM3;SGSM3	NM_015705;NM_001301849	5'UTR;5'UTR	CRPL10F	0.0790229	2.13e-07	2.84e-06
cg19526722	chr1	89061160	-	cg19526722		OpenSea	PKN2-AS1	NR_110682	Body	CRPL10F	-0.189284	2.11e-07	2.84e-06
cg05316065	chr8	130799007	-	cg05316065		OpenSea	GSDMC;GSDMC	NM_031415;NM_031415	1stExon;5'UTR	TNFR2L10F	-0.40328	2.2e-07	2.92e-06
cg06019998	chr17	15845440	-	cg06019998	chr17:15847757-15849513	N_Shelf				IL10L10F	-0.945562	2.25e-07	2.99e-06
cg02392359	chr15	55572079	+	cg02392359		OpenSea	RAB27A	NM_183235	5'UTR	CRPL10F	-0.250153	2.27e-07	2.99e-06
cg08074885	chr15	39746976	+	cg08074885		OpenSea				CRPL10F	-0.208184	2.3e-07	3.02e-06
cg01015210	chr5	141475540	-	cg01015210		OpenSea				CRPL10F	-0.200855	2.38e-07	3.11e-06
cg14712766	chr15	39636986	+	cg14712766		OpenSea				TNFR2L10F	-0.787295	2.54e-07	3.29e-06
cg08549335	chr7	30387954	-	cg08549335		OpenSea	ZNRF2	NM_147128	Body	CRPL10F	-0.353277	2.58e-07	3.33e-06
cg08732950	chr16	89023389	+	cg08732950		OpenSea	CBFA2T3	NM_005187	Body	TNFR2L10F	0.341048	2.59e-07	3.33e-06
cg16669300	chr9	134882463	-	cg16669300		OpenSea	MED27;MED27	NM_004269;NM_001253881	Body;Body	TNFR2L10F	-0.690396	2.66e-07	3.34e-06
cg20248701	chr3	53868093	+	cg20248701		OpenSea	CHDH	NM_018397	5'UTR	CRPL10F	-0.172228	2.66e-07	3.34e-06
cg25198113	chr1	5743886	-	cg25198113		OpenSea				CRPL10F	0.0802111	2.67e-07	3.34e-06
cg25198113	chr1	5743886	-	cg25198113		OpenSea				TNFR2L10F	0.300929	2.67e-07	3.34e-06
cg27218041	chr1	59953216	-	cg27218041		OpenSea	FGGY;FGGY;FGGY;FGGY	NM_018291;NM_001244714;NM_001113411;NR_103473	Body;Body;Body;Body	IL10L10F	0.319384	2.69e-07	3.34e-06
cg24899334	chr3	167803450	+	cg24899334		OpenSea	GOLIM4;GOLIM4	NM_014498;NM_001308155	Body;Body	TNFR2L10F	-1.13724	2.68e-07	3.34e-06
cg01680062	chr21	36185960	-	cg01680062		OpenSea	RUNX1;RUNX1	NM_001001890;NM_001754	Body;Body	IL10L10F	-0.414822	2.64e-07	3.34e-06
cg06092244	chr2	48796151	-	cg06092244		OpenSea	STON1-GTF2A1L	NM_172311	TSS200	CRPL10F	-0.301603	2.99e-07	3.71e-06
cg15033511	chr17	54994023	+	cg15033511	chr17:54990832-54991771	S_Shelf				CRPL10F	-0.101753	3.05e-07	3.74e-06
cg14214717	chr20	5466839	-	cg14214717		OpenSea				IL6L10F	0.141492	3.04e-07	3.74e-06
cg16978321	chr19	5983811	+	cg16978321		OpenSea	LOC100128568	NR_046376	Body	IL10L10F	-0.540561	3.14e-07	3.84e-06
cg19821297	chr19	12890029	-	cg19821297	chr19:12889083-12889343	S_Shore				IL10L10F	-0.433192	3.36e-07	4.08e-06
cg13673960	chr4	1742301	+	cg13673960		OpenSea	TACC3	NM_006342	Body	IL10L10F	0.339506	3.44e-07	4.17e-06
cg16384774	chr14	89626932	-	cg16384774	chr14:89628885-89629199	N_Shore	FOXN3;FOXN3	NM_005197;NM_001085471	3'UTR;3'UTR	TNFR2L10F	-0.484476	3.49e-07	4.21e-06
cg08350742	chr4	40814531	-	cg08350742		OpenSea	APBB2;APBB2;APBB2;APBB2;APBB2;APBB2;APBB2	NM_001166054;NM_001166053;NM_173075;NM_001166050;NM_004307;NM_001166052;NM_001166051	3'UTR;3'UTR;3'UTR;3'UTR;3'UTR;3'UTR;3'UTR	CRPL10F	-0.21258	3.51e-07	4.22e-06
cg08303079	chr9	132345286	+	cg08303079		OpenSea				CRPL10F	-0.147037	3.57e-07	4.25e-06
cg17108423	chr6	170559792	-	cg17108423		OpenSea				TNFR2L10F	0.419162	3.56e-07	4.25e-06
cg13163786	chr11	121411582	+	cg13163786		OpenSea	SORL1	NM_003105	Body	CRPL10F	-0.240945	3.64e-07	4.3e-06
cg01225452	chr4	48972831	-	cg01225452		OpenSea				IL10L10F	-0.356946	3.64e-07	4.3e-06
cg16971621	chr8	142167457	-	cg16971621		OpenSea	DENND3	NM_014957	Body	CRPL10F	-0.120505	3.87e-07	4.51e-06
cg08350742	chr4	40814531	-	cg08350742		OpenSea	APBB2;APBB2;APBB2;APBB2;APBB2;APBB2;APBB2	NM_001166054;NM_001166053;NM_173075;NM_001166050;NM_004307;NM_001166052;NM_001166051	3'UTR;3'UTR;3'UTR;3'UTR;3'UTR;3'UTR;3'UTR	IL6L10F	-0.389476	3.84e-07	4.51e-06
cg08732950	chr16	89023389	+	cg08732950		OpenSea	CBFA2T3	NM_005187	Body	IL10L10F	0.257838	3.86e-07	4.51e-06
cg07865630	chr6	139794360	-	cg07865630		OpenSea	LOC645434	NR_033919	Body	IL6L10F	-0.520145	3.91e-07	4.53e-06
cg14330293	chr17	1374051	+	cg14330293	chr17:1375216-1375460	N_Shore	MYO1C;MYO1C;MYO1C	NM_001080779;NM_033375;NM_001080950	Body;Body;Body	IL10L10F	0.306038	4.03e-07	4.63e-06
cg17108423	chr6	170559792	-	cg17108423		OpenSea				IL6L10F	0.206657	4.03e-07	4.63e-06
cg27206232	chr13	103264306	-	cg27206232		OpenSea	TPP2	NM_003291	Body	CRPL10F	0.146999	4.05e-07	4.63e-06
cg09298159	chr6	153302566	-	cg09298159	chr6:153303408-153304973	N_Shore	FBXO5;FBXO5	NM_012177;NM_001142522	Body;5'UTR	IL6L10F	-0.428341	4.28e-07	4.88e-06
cg07865630	chr6	139794360	-	cg07865630		OpenSea	LOC645434	NR_033919	Body	IL10L10F	-0.81956	4.71e-07	5.35e-06
cg12170419	chr20	23367377	+	cg12170419		OpenSea	NAPB;NAPB;NAPB;NAPB;NAPB	NR_104266;NM_001283026;NM_022080;NM_001283018;NM_001283020	Body;Body;Body;Body;Body	CRPL10F	-0.191445	5.03e-07	5.69e-06
cg25488374	chr12	107799002	-	cg25488374		OpenSea	BTBD11	NM_001018072	Body	TNFR2L10F	-0.536656	5.07e-07	5.71e-06
cg10597669	chr12	122294017	+	cg10597669		OpenSea	HPD;HPD	NM_001171993;NM_002150	Body;Body	CRPL10F	-0.0798982	5.16e-07	5.76e-06
cg12800932	chr7	158611626	+	cg12800932		OpenSea	ESYT2	NM_020728	Body	IL6L10F	-0.67463	5.16e-07	5.76e-06
cg01297684	chr12	56069634	+	cg01297684		OpenSea				IL10L10F	-0.98414	5.49e-07	6.1e-06
cg04070976	chr17	73577422	+	cg04070976		OpenSea				IL6L10F	0.213989	5.57e-07	6.16e-06
cg07138962	chr14	100035588	+	cg07138962		OpenSea	CCDC85C	NM_001144995	Body	TNFR2L10F	0.415196	5.65e-07	6.23e-06
cg06097048	chr10	28848388	+	cg06097048		OpenSea	WAC;WAC;WAC	NM_016628;NM_100486;NM_100264	Body;Body;Body	IL6L10F	0.15333	5.96e-07	6.54e-06
cg17155829	chr19	7413575	-	cg17155829		OpenSea				TNFR2L10F	-0.527073	6.03e-07	6.6e-06
cg19198358	chr8	1725179	+	cg19198358		OpenSea	CLN8	NM_018941	Body	IL6L10F	-0.146521	6.38e-07	6.96e-06
cg26010546	chr18	52490607	-	cg26010546		OpenSea				IL6L10F	-0.31418	6.54e-07	7.07e-06
cg19382191	chr7	45200201	+	cg19382191	chr7:45197181-45197807	S_Shelf	RAMP3	NM_005856	Body	IL10L10F	0.369585	6.54e-07	7.07e-06
cg21069139	chr1	115091976	+	cg21069139		OpenSea				CRPL10F	-0.134423	6.71e-07	7.22e-06
cg10241823	chr17	841205	+	cg10241823		OpenSea	NXN	NM_022463	Body	IL6L10F	0.185878	6.84e-07	7.33e-06
cg01680062	chr21	36185960	-	cg01680062		OpenSea	RUNX1;RUNX1	NM_001001890;NM_001754	Body;Body	TNFR2L10F	-0.472384	6.88e-07	7.34e-06
cg02695372	chr7	106320126	-	cg02695372		OpenSea				IL6L10F	-0.344457	7.18e-07	7.64e-06
cg24854225	chr1	185374534	+	cg24854225		OpenSea				IL6L10F	-0.347193	7.41e-07	7.85e-06
cg05696969	chr5	145326228	-	cg05696969		OpenSea	SH3RF2	NM_152550	Body	CRPL10F	-0.19778	7.44e-07	7.85e-06
cg09304470	chr18	76916901	-	cg09304470		OpenSea	ATP9B;ATP9B	NM_198531;NM_001306085	Body;Body	TNFR2L10F	-0.782127	7.59e-07	7.98e-06
cg26365581	chr1	172243209	-	cg26365581		OpenSea	DNM3;DNM3	NM_001136127;NM_015569	Body;Body	IL10L10F	-0.558195	7.83e-07	8.2e-06
cg24899334	chr3	167803450	+	cg24899334		OpenSea	GOLIM4;GOLIM4	NM_014498;NM_001308155	Body;Body	IL6L10F	-0.581513	7.89e-07	8.23e-06
cg24296397	chr3	49692537	+	cg24296397	chr3:49690022-49690329	S_Shelf	BSN	NM_003458	Body	IL6L10F	0.179725	7.97e-07	8.28e-06
cg06092244	chr2	48796151	-	cg06092244		OpenSea	STON1-GTF2A1L	NM_172311	TSS200	IL6L10F	-0.52375	8.22e-07	8.51e-06
cg15549550	chr2	11857010	-	cg15549550		OpenSea	LPIN1	NM_001261428	Body	IL6L10F	-0.240134	8.42e-07	8.68e-06
cg14187619	chr2	239343111	+	cg14187619	chr2:239344401-239344627	N_Shore	ASB1	NM_001040445	Body	TNFR2L10F	-0.794564	8.68e-07	8.88e-06
cg24207009	chr17	76037562	-	cg24207009	chr17:76037074-76037323	S_Shore	TNRC6C;TNRC6C	NM_018996;NM_001142640	5'UTR;5'UTR	TNFR2L10F	0.838365	8.67e-07	8.88e-06
cg27142757	chr1	150573467	-	cg27142757		OpenSea				IL6L10F	-0.341475	8.89e-07	9.06e-06
cg08074885	chr15	39746976	+	cg08074885		OpenSea				IL10L10F	-0.5816	8.93e-07	9.07e-06
cg24145401	chr1	159047177	-	cg24145401		OpenSea	AIM2	NM_004833	TSS1500	TNFR2L10F	-1.07754	9.07e-07	9.18e-06
cg26312071	chr15	90727783	+	cg26312071	chr15:90727879-90728570	N_Shore	SEMA4B	NM_020210	TSS1500	CRPL10F	-0.140615	9.51e-07	9.58e-06
cg12249789	chr21	45203404	+	cg12249789	chr21:45206579-45207051	N_Shelf				TNFR2L10F	-0.476421	9.62e-07	9.67e-06
cg23635525	chr7	133196253	+	cg23635525		OpenSea	EXOC4	NM_021807	Body	TNFR2L10F	-0.681701	9.68e-07	9.69e-06
cg18146146	chr19	47247380	+	cg18146146	chr19:47248749-47249948	N_Shore	STRN4;STRN4	NM_001039877;NM_013403	Body;Body	IL10L10F	-0.556482	9.77e-07	9.74e-06
cg14712766	chr15	39636986	+	cg14712766		OpenSea				CRPL10F	-0.198053	9.91e-07	9.85e-06
cg04268643	chr17	76037239	+	cg04268643	chr17:76037074-76037323	Island	TNRC6C;TNRC6C	NM_018996;NM_001142640	5'UTR;5'UTR	IL6L10F	0.157492	1.01e-06	9.95e-06
cg16161069	chr16	442770	-	cg16161069		OpenSea	LOC100134368	NR_024453	Body	IL6L10F	0.281507	1.01e-06	9.95e-06
cg13163786	chr11	121411582	+	cg13163786		OpenSea	SORL1	NM_003105	Body	IL10L10F	-0.688732	1.02e-06	1e-05
cg10636246	chr1	159046973	+	cg10636246		OpenSea	AIM2	NM_004833	TSS1500	TNFR2L10F	-0.966552	1.03e-06	1.01e-05
cg20179730	chr13	22111377	-	cg20179730		OpenSea	MICU2	NM_152726	Body	TNFR2L10F	-0.674118	1.04e-06	1.02e-05
cg05773425	chr1	16644480	+	cg05773425		OpenSea	FBXO42	NM_018994	5'UTR	IL6L10F	0.374231	1.07e-06	1.03e-05
cg06019998	chr17	15845440	-	cg06019998	chr17:15847757-15849513	N_Shelf				TNFR2L10F	-1.06378	1.07e-06	1.03e-05
cg24687529	chr1	117529954	+	cg24687529		OpenSea	PTGFRN	NM_020440	3'UTR	CRPL10F	0.149524	1.07e-06	1.03e-05
cg26468118	chr13	111175670	-	cg26468118		OpenSea	RAB20	NM_017817	3'UTR	TNFR2L10F	-0.608626	1.09e-06	1.04e-05
cg05316065	chr8	130799007	-	cg05316065		OpenSea	GSDMC;GSDMC	NM_031415;NM_031415	1stExon;5'UTR	IL6L10F	-0.196097	1.1e-06	1.05e-05
cg26365581	chr1	172243209	-	cg26365581		OpenSea	DNM3;DNM3	NM_001136127;NM_015569	Body;Body	IL6L10F	-0.34441	1.1e-06	1.05e-05
cg04874562	chr11	5462540	+	cg04874562		OpenSea	OR51I1	NM_001005288	1stExon	IL6L10F	0.178906	1.15e-06	1.1e-05
cg26312071	chr15	90727783	+	cg26312071	chr15:90727879-90728570	N_Shore	SEMA4B	NM_020210	TSS1500	TNFR2L10F	-0.489734	1.16e-06	1.1e-05
cg11104177	chr10	123605117	-	cg11104177		OpenSea	ATE1;ATE1;ATE1;ATE1;ATE1;ATE1	NR_110006;NM_001288734;NM_001288735;NM_007041;NM_001001976;NM_001288736	Body;Body;Body;Body;Body;Body	IL6L10F	-0.501915	1.19e-06	1.12e-05
cg00968118	chr22	43686187	-	cg00968118		OpenSea	SCUBE1	NM_173050	Body	IL10L10F	0.332444	1.22e-06	1.15e-05
cg22895728	chr12	93531972	-	cg22895728		OpenSea	LOC643339	NR_040096	Body	IL6L10F	-0.297129	1.23e-06	1.16e-05
cg09536564	chr1	221467746	-	cg09536564		OpenSea				CRPL10F	-0.142141	1.24e-06	1.16e-05
cg18442362	chr7	44677772	+	cg18442362		OpenSea	OGDH;OGDH;OGDH	NM_001003941;NM_001165036;NM_002541	Body;Body;Body	CRPL10F	-0.207875	1.26e-06	1.17e-05
cg05316065	chr8	130799007	-	cg05316065		OpenSea	GSDMC;GSDMC	NM_031415;NM_031415	1stExon;5'UTR	IL10L10F	-0.311359	1.27e-06	1.18e-05
cg12573289	chr7	45075791	+	cg12573289		OpenSea	CCM2;CCM2;CCM2;CCM2;CCM2	NM_031443;NM_001029835;NM_001167935;NM_001167934;NR_030770	Body;Body;Body;Body;Body	TNFR2L10F	0.213961	1.36e-06	1.26e-05
cg00568296	chr20	48675540	+	cg00568296		OpenSea				IL6L10F	0.175422	1.39e-06	1.28e-05
cg13316148	chr2	191916269	+	cg13316148		OpenSea	STAT4	NM_003151	Body	CRPL10F	-0.217401	1.39e-06	1.28e-05
cg23635525	chr7	133196253	+	cg23635525		OpenSea	EXOC4	NM_021807	Body	IL6L10F	-0.352489	1.42e-06	1.3e-05
cg16961793	chr22	45624479	-	cg16961793		OpenSea	KIAA0930	NM_001009880	Body	IL6L10F	-0.288335	1.46e-06	1.33e-05
cg26605900	chr17	72614843	-	cg26605900		OpenSea	CD300E	NM_181449	Body	IL6L10F	0.154104	1.48e-06	1.34e-05
cg03307560	chr16	28161100	-	cg03307560		OpenSea	XPO6;XPO6	NM_001270940;NM_015171	Body;Body	IL6L10F	-0.326296	1.48e-06	1.34e-05
cg01177100	chr3	9176211	-	cg01177100	chr3:9177691-9178189	N_Shore	SRGAP3;SRGAP3	NM_001033117;NM_014850	Body;Body	TNFR2L10F	0.305966	1.57e-06	1.42e-05
cg11993828	chr4	38525620	+	cg11993828		OpenSea	LINC01258	NR_110951	TSS1500	IL6L10F	-0.421442	1.71e-06	1.53e-05
cg17321267	chr19	5669909	+	cg17321267		OpenSea				IL6L10F	0.301435	1.71e-06	1.53e-05
cg08830689	chr6	138062303	+	cg08830689		OpenSea				CRPL10F	-0.165621	1.72e-06	1.53e-05
cg26416615	chr10	63751843	+	cg26416615		OpenSea	ARID5B	NM_032199	Body	IL10L10F	-0.70251	1.72e-06	1.53e-05
cg07688032	chr19	2330963	+	cg07688032	chr19:2328364-2329089	S_Shore	SPPL2B;SPPL2B	NM_001077238;NM_152988	Body;Body	TNFR2L10F	0.300743	1.79e-06	1.59e-05
cg19382191	chr7	45200201	+	cg19382191	chr7:45197181-45197807	S_Shelf	RAMP3	NM_005856	Body	TNFR2L10F	0.439656	1.79e-06	1.59e-05
cg14330293	chr17	1374051	+	cg14330293	chr17:1375216-1375460	N_Shore	MYO1C;MYO1C;MYO1C	NM_001080779;NM_033375;NM_001080950	Body;Body;Body	TNFR2L10F	0.360654	1.83e-06	1.61e-05
cg04331199	chr1	67227248	+	cg04331199		OpenSea	TCTEX1D1	NM_152665	Body	IL10L10F	-0.4923	1.89e-06	1.66e-05
cg13257654	chr8	42946331	+	cg13257654	chr8:42948532-42948928	N_Shelf				TNFR2L10F	0.334875	1.91e-06	1.67e-05
cg13163786	chr11	121411582	+	cg13163786		OpenSea	SORL1	NM_003105	Body	TNFR2L10F	-0.776542	1.92e-06	1.68e-05
cg04331199	chr1	67227248	+	cg04331199		OpenSea	TCTEX1D1	NM_152665	Body	TNFR2L10F	-0.565159	1.95e-06	1.7e-05
cg13316148	chr2	191916269	+	cg13316148		OpenSea	STAT4	NM_003151	Body	IL6L10F	-0.390725	2.01e-06	1.75e-05
cg13827209	chr9	101912842	+	cg13827209		OpenSea	TGFBR1;TGFBR1	NM_001130916;NM_004612	3'UTR;3'UTR	IL6L10F	0.409184	2.02e-06	1.75e-05
cg11993828	chr4	38525620	+	cg11993828		OpenSea	LINC01258	NR_110951	TSS1500	TNFR2L10F	-0.793518	2.03e-06	1.76e-05
cg26344619	chr14	76046018	+	cg26344619	chr14:76044590-76045102	S_Shore	FLVCR2	NM_017791	Body	IL6L10F	-0.138153	2.04e-06	1.76e-05
cg13659875	chr8	9045074	+	cg13659875		OpenSea	LOC101929128	NR_125431	TSS1500	IL10L10F	-0.211038	2.07e-06	1.76e-05
cg16961793	chr22	45624479	-	cg16961793		OpenSea	KIAA0930	NM_001009880	Body	IL10L10F	-0.46079	2.07e-06	1.76e-05
cg12839166	chr11	5462320	+	cg12839166		OpenSea	OR51I1;OR51B5;OR51B5	NM_001005288;NR_038321;NM_001005567	1stExon;Body;5'UTR	IL10L10F	0.36039	2.07e-06	1.76e-05
cg19198358	chr8	1725179	+	cg19198358		OpenSea	CLN8	NM_018941	Body	IL10L10F	-0.22504	2.06e-06	1.76e-05
cg27310092	chr1	151945663	-	cg27310092		OpenSea				IL10L10F	-0.553984	2.1e-06	1.78e-05
cg27206232	chr13	103264306	-	cg27206232		OpenSea	TPP2	NM_003291	Body	IL6L10F	0.251198	2.22e-06	1.88e-05
cg25488374	chr12	107799002	-	cg25488374		OpenSea	BTBD11	NM_001018072	Body	CRPL10F	-0.145579	2.24e-06	1.88e-05
cg23635525	chr7	133196253	+	cg23635525		OpenSea	EXOC4	NM_021807	Body	IL1raL10F	-0.452064	2.26e-06	1.9e-05
cg05773425	chr1	16644480	+	cg05773425		OpenSea	FBXO42	NM_018994	5'UTR	CRPL10F	0.200381	2.32e-06	1.94e-05
cg04070976	chr17	73577422	+	cg04070976		OpenSea				IL10L10F	0.325988	2.36e-06	1.96e-05
cg15034393	chr3	152856773	-	cg15034393		OpenSea				TNFR2L10F	-0.693082	2.36e-06	1.96e-05
cg01177100	chr3	9176211	-	cg01177100	chr3:9177691-9178189	N_Shore	SRGAP3;SRGAP3	NM_001033117;NM_014850	Body;Body	IL10L10F	0.247926	2.37e-06	1.96e-05
cg05696969	chr5	145326228	-	cg05696969		OpenSea	SH3RF2	NM_152550	Body	TNFR2L10F	-0.699642	2.39e-06	1.97e-05
cg04323816	chr22	40784430	+	cg04323816		OpenSea	SGSM3;SGSM3	NM_015705;NM_001301849	5'UTR;5'UTR	TNFR2L10F	0.260423	2.39e-06	1.97e-05
cg26859083	chr3	55002054	-	cg26859083		OpenSea	LRTM1;CACNA2D3	NM_001304389;NM_018398	TSS1500;Body	IL10L10F	0.428694	2.41e-06	1.98e-05
cg08928261	chr4	40240766	-	cg08928261		OpenSea	RHOH;RHOH;RHOH;RHOH;RHOH;RHOH;RHOH;RHOH;RHOH;RHOH;RHOH;RHOH	NM_001278368;NM_001278367;NM_001278366;NM_001278365;NM_001278364;NM_001278369;NM_004310;NM_001278363;NM_001278362;NM_001278361;NM_001278360;NM_001278359	5'UTR;5'UTR;5'UTR;5'UTR;5'UTR;5'UTR;5'UTR;5'UTR;5'UTR;5'UTR;5'UTR;5'UTR	IL10L10F	-0.518064	2.43e-06	1.98e-05
cg21506763	chr3	38060329	-	cg21506763		OpenSea	PLCD1;PLCD1;PLCD1	NR_024071;NM_001130964;NM_006225	Body;Body;Body	TNFR2L10F	0.364993	2.43e-06	1.98e-05
cg17466278	chr20	46391709	-	cg17466278		OpenSea	SULF2;SULF2;SULF2	NM_018837;NM_001161841;NM_198596	5'UTR;5'UTR;5'UTR	CRPL10F	0.0954798	2.45e-06	1.99e-05
cg17774776	chr5	6638536	+	cg17774776		OpenSea	SRD5A1	NM_001047	Body	CRPL10F	-0.163548	2.53e-06	2.05e-05
cg03768345	chr14	103027280	+	cg03768345		OpenSea				IL10L10F	0.278634	2.58e-06	2.09e-05
cg07443710	chr10	71206848	-	cg07443710		OpenSea				TNFR2L10F	-0.554181	2.59e-06	2.09e-05
cg25501329	chr16	59934140	-	cg25501329		OpenSea	LOC101927580	NR_110917	Body	IL6L10F	0.325862	2.66e-06	2.14e-05
cg24899334	chr3	167803450	+	cg24899334		OpenSea	GOLIM4;GOLIM4	NM_014498;NM_001308155	Body;Body	IL10L10F	-0.891048	2.7e-06	2.17e-05
cg13646708	chr11	102447295	+	cg13646708		OpenSea				TNFR2L10F	-0.838193	2.74e-06	2.19e-05
cg20248701	chr3	53868093	+	cg20248701		OpenSea	CHDH	NM_018397	5'UTR	IL10L10F	-0.455939	2.75e-06	2.19e-05
cg06097048	chr10	28848388	+	cg06097048		OpenSea	WAC;WAC;WAC	NM_016628;NM_100486;NM_100264	Body;Body;Body	TNFR2L10F	0.302104	2.78e-06	2.21e-05
cg24296397	chr3	49692537	+	cg24296397	chr3:49690022-49690329	S_Shelf	BSN	NM_003458	Body	TNFR2L10F	0.336999	2.81e-06	2.23e-05
cg20991997	chr11	113844406	+	cg20991997		OpenSea	HTR3A;HTR3A;HTR3A	NM_213621;NM_000869;NR_046363	TSS1500;TSS1500;TSS1500	IL10L10F	0.42853	2.83e-06	2.24e-05
cg08663999	chr3	150089701	-	cg08663999		OpenSea				TNFR2L10F	-0.518989	2.85e-06	2.25e-05
cg02293874	chr3	124408740	+	cg02293874		OpenSea	KALRN;KALRN	NM_001024660;NM_007064	Body;Body	IL6L10F	-0.203766	2.88e-06	2.26e-05
cg08010984	chr3	170964901	+	cg08010984		OpenSea	TNIK;TNIK;TNIK;TNIK;TNIK;TNIK;TNIK;TNIK	NM_001161560;NM_015028;NM_001161563;NM_001161562;NM_001161561;NM_001161566;NM_001161565;NM_001161564	Body;Body;Body;Body;Body;Body;Body;Body	CRPL10F	-0.133712	2.97e-06	2.33e-05
cg12847371	chr19	13056058	-	cg12847371	chr19:13056458-13057125	N_Shore	RAD23A;RAD23A;RAD23A;RAD23A	NM_001270363;NM_001270362;NM_005053;NR_072976	TSS1500;TSS1500;TSS1500;TSS1500	CRPL10F	-0.15599	3.05e-06	2.39e-05
cg02590484	chr17	38178658	-	cg02590484		OpenSea	MED24;MED24;MED24;MED24;MED24;MED24;MED24;MED24	NM_014815;NM_001267797;NM_001079518;NR_052017;NR_052017;NM_014815;NM_001267797;NM_001079518	ExonBnd;ExonBnd;ExonBnd;ExonBnd;Body;Body;Body;Body	IL10L10F	0.495368	3.06e-06	2.39e-05
cg18544034	chr2	8626420	-	cg18544034		OpenSea				TNFR2L10F	-0.518275	3.1e-06	2.41e-05
cg24687529	chr1	117529954	+	cg24687529		OpenSea	PTGFRN	NM_020440	3'UTR	IL6L10F	0.25535	3.11e-06	2.41e-05
cg16498856	chr3	141196360	+	cg16498856		OpenSea				CRPL10F	-0.179747	3.14e-06	2.42e-05
cg01183122	chr21	35884348	-	cg01183122		OpenSea	KCNE1	NM_000219	TSS1500	CRPL10F	-0.116603	3.21e-06	2.47e-05
cg24521685	chr4	185748534	-	cg24521685	chr4:185746557-185747827	S_Shore	ACSL1;ACSL1	NM_001286711;NM_001995	TSS1500;TSS1500	CRPL10F	-0.100122	3.22e-06	2.47e-05
cg08350742	chr4	40814531	-	cg08350742		OpenSea	APBB2;APBB2;APBB2;APBB2;APBB2;APBB2;APBB2	NM_001166054;NM_001166053;NM_173075;NM_001166050;NM_004307;NM_001166052;NM_001166051	3'UTR;3'UTR;3'UTR;3'UTR;3'UTR;3'UTR;3'UTR	TNFR2L10F	-0.655551	3.44e-06	2.63e-05
cg07865630	chr6	139794360	-	cg07865630		OpenSea	LOC645434	NR_033919	Body	TNFR2L10F	-0.853314	3.44e-06	2.63e-05
cg02158894	chr19	17976717	-	cg02158894		OpenSea				TNFR2L10F	-0.368685	3.48e-06	2.65e-05
cg02392359	chr15	55572079	+	cg02392359		OpenSea	RAB27A	NM_183235	5'UTR	IL10L10F	-0.658822	3.57e-06	2.71e-05
cg12955870	chr2	169888032	-	cg12955870		OpenSea	ABCB11	NM_003742	TSS200	IL6L10F	-0.230727	3.67e-06	2.78e-05
cg07138962	chr14	100035588	+	cg07138962		OpenSea	CCDC85C	NM_001144995	Body	IL6L10F	0.190145	3.71e-06	2.8e-05
cg18146146	chr19	47247380	+	cg18146146	chr19:47248749-47249948	N_Shore	STRN4;STRN4	NM_001039877;NM_013403	Body;Body	TNFR2L10F	-0.675618	3.75e-06	2.82e-05
cg15549550	chr2	11857010	-	cg15549550		OpenSea	LPIN1	NM_001261428	Body	TNFR2L10F	-0.411655	3.77e-06	2.83e-05
cg06963709	chr7	155150793	+	cg06963709		OpenSea				TNFR2L10F	-0.721361	3.81e-06	2.85e-05
cg14104280	chr10	82363213	-	cg14104280		OpenSea	SH2D4B;SH2D4B	NM_207372;NM_001145719	Body;Body	IL10L10F	-0.543159	3.81e-06	2.85e-05
cg16669300	chr9	134882463	-	cg16669300		OpenSea	MED27;MED27	NM_004269;NM_001253881	Body;Body	IL10L10F	-0.49087	3.83e-06	2.85e-05
cg16971621	chr8	142167457	-	cg16971621		OpenSea	DENND3	NM_014957	Body	IL6L10F	-0.199733	3.85e-06	2.86e-05
cg04070976	chr17	73577422	+	cg04070976		OpenSea				CRPL10F	0.110025	3.92e-06	2.89e-05
cg26010546	chr18	52490607	-	cg26010546		OpenSea				CRPL10F	-0.160881	3.92e-06	2.89e-05
cg26089920	chr18	22494802	+	cg26089920		OpenSea				IL6L10F	-0.122084	3.91e-06	2.89e-05
cg02300329	chr14	55574999	-	cg02300329		OpenSea				CRPL10F	-0.114397	3.97e-06	2.92e-05
cg24796548	chr10	108785434	+	cg24796548		OpenSea	SORCS1;SORCS1;SORCS1;SORCS1;SORCS1;SORCS1	NM_001013031;NM_001206570;NM_052918;NM_001206572;NM_001206569;NM_001206571	Body;Body;Body;Body;Body;Body	CRPL10F	-0.134721	4.2e-06	3.08e-05
cg13257654	chr8	42946331	+	cg13257654	chr8:42948532-42948928	N_Shelf				IL6L10F	0.150663	4.24e-06	3.1e-05
cg17076667	chr10	121418050	-	cg17076667		OpenSea	BAG3	NM_004281	Body	IL10L10F	-0.352385	4.27e-06	3.11e-05
cg15656693	chr3	182929476	-	cg15656693		OpenSea	MCF2L2	NM_015078	Body	TNFR2L10F	-0.466625	4.48e-06	3.25e-05
cg12839166	chr11	5462320	+	cg12839166		OpenSea	OR51I1;OR51B5;OR51B5	NM_001005288;NR_038321;NM_001005567	1stExon;Body;5'UTR	IL6L10F	0.212507	4.53e-06	3.28e-05
cg08830689	chr6	138062303	+	cg08830689		OpenSea				IL6L10F	-0.285251	4.57e-06	3.3e-05
cg16648387	chr1	62729617	+	cg16648387		OpenSea	KANK4	NM_181712	Body	TNFR2L10F	-0.674006	4.58e-06	3.3e-05
cg14839898	chr11	111956362	-	cg14839898	chr11:111957352-111957681	N_Shore	TIMM8B;SDHD;TIMM8B	NM_012459;NM_003002;NR_028383	Body;TSS1500;Body	IL6L10F	-0.275715	4.61e-06	3.31e-05
cg15656693	chr3	182929476	-	cg15656693		OpenSea	MCF2L2	NM_015078	Body	IL6L10F	-0.247654	4.69e-06	3.36e-05
cg03924136	chr20	62367108	-	cg03924136	chr20:62368955-62371962	N_Shore	LIME1;LIME1;LIME1;LIME1;ZGPAT;ZGPAT;ZGPAT;ZGPAT;ZGPAT	NM_017806;NM_001305655;NM_001305654;NM_001305654;NM_181485;NM_001195654;NM_001195653;NM_032527;NM_001083113	TSS1500;TSS1500;1stExon;5'UTR;Body;Body;Body;Body;Body	IL10L10F	0.470499	4.79e-06	3.43e-05
cg01183122	chr21	35884348	-	cg01183122		OpenSea	KCNE1	NM_000219	TSS1500	TNFR2L10F	-0.417519	4.98e-06	3.54e-05
cg11642336	chr7	30329949	+	cg11642336		OpenSea	MIR550B1;ZNRF2	NR_037513;NM_147128	TSS1500;Body	TNFR2L10F	-0.500777	4.97e-06	3.54e-05
cg09304470	chr18	76916901	-	cg09304470		OpenSea	ATP9B;ATP9B	NM_198531;NM_001306085	Body;Body	IL6L10F	-0.36246	5.17e-06	3.67e-05
cg18363226	chr7	132741882	+	cg18363226		OpenSea	CHCHD3	NM_017812	Body	IL6L10F	-0.272013	5.29e-06	3.74e-05
cg01795822	chr1	10528093	-	cg01795822		OpenSea	DFFA;DFFA	NM_004401;NM_213566	Body;Body	CRPL10F	0.144394	5.33e-06	3.76e-05
cg16545370	chr18	42475531	+	cg16545370		OpenSea	SETBP1	NM_015559	Body	CRPL10F	-0.12744	5.35e-06	3.76e-05
cg06618497	chr14	102198604	-	cg06618497		OpenSea	C14orf72	NR_026774	Body	CRPL10F	-0.0887424	5.36e-06	3.76e-05
cg10241823	chr17	841205	+	cg10241823		OpenSea	NXN	NM_022463	Body	CRPL10F	0.0954103	5.39e-06	3.77e-05
cg09029633	chr16	90077571	-	cg09029633		OpenSea	DBNDD1;DBNDD1;DBNDD1;DBNDD1	NM_001288708;NM_024043;NM_001042610;NM_001288709	Body;TSS1500;Body;Body	TNFR2L10F	0.383331	5.59e-06	3.9e-05
cg25082943	chr12	93367516	+	cg25082943		OpenSea				IL6L10F	-0.263584	5.71e-06	3.95e-05
cg17466278	chr20	46391709	-	cg17466278		OpenSea	SULF2;SULF2;SULF2	NM_018837;NM_001161841;NM_198596	5'UTR;5'UTR;5'UTR	IL6L10F	0.166772	5.68e-06	3.95e-05
cg04874562	chr11	5462540	+	cg04874562		OpenSea	OR51I1	NM_001005288	1stExon	TNFR2L10F	0.354755	5.7e-06	3.95e-05
cg21081878	chr21	38334730	-	cg21081878	chr21:38338384-38338904	N_Shelf	HLCS	NM_000411	5'UTR	CRPL10F	0.150223	5.77e-06	3.98e-05
cg10241823	chr17	841205	+	cg10241823		OpenSea	NXN	NM_022463	Body	IL10L10F	0.274391	5.75e-06	3.98e-05
cg15656693	chr3	182929476	-	cg15656693		OpenSea	MCF2L2	NM_015078	Body	CRPL10F	-0.13395	5.88e-06	4.04e-05
cg27310092	chr1	151945663	-	cg27310092		OpenSea				IL6L10F	-0.328039	6.03e-06	4.13e-05
cg15656693	chr3	182929476	-	cg15656693		OpenSea	MCF2L2	NM_015078	Body	IL10L10F	-0.393838	6.12e-06	4.19e-05
cg00159243	chr12	109023799	-	cg00159243		OpenSea	SELPLG	NM_003006	5'UTR	IL10L10F	-0.349176	6.38e-06	4.35e-05
cg11731280	chr9	140066934	-	cg11731280	chr9:140068792-140069082	N_Shore	TMEM210	NM_001282477	TSS1500	TNFR2L10F	0.490311	6.42e-06	4.37e-05
cg03504306	chr19	17326697	+	cg03504306	chr19:17326114-17326551	S_Shore	USE1	NM_018467	Body	CRPL10F	0.0668379	6.47e-06	4.39e-05
cg08350742	chr4	40814531	-	cg08350742		OpenSea	APBB2;APBB2;APBB2;APBB2;APBB2;APBB2;APBB2	NM_001166054;NM_001166053;NM_173075;NM_001166050;NM_004307;NM_001166052;NM_001166051	3'UTR;3'UTR;3'UTR;3'UTR;3'UTR;3'UTR;3'UTR	IL10L10F	-0.556433	6.55e-06	4.43e-05
cg01183122	chr21	35884348	-	cg01183122		OpenSea	KCNE1	NM_000219	TSS1500	IL6L10F	-0.201462	6.65e-06	4.49e-05
cg08960443	chr9	140066947	-	cg08960443	chr9:140068792-140069082	N_Shore	TMEM210	NM_001282477	TSS1500	TNFR2L10F	0.51955	6.84e-06	4.61e-05
cg00619207	chr1	111743368	+	cg00619207	chr1:111746337-111747303	N_Shelf	DENND2D	NM_024901	TSS200	IL6L10F	-0.213549	6.92e-06	4.65e-05
cg26468118	chr13	111175670	-	cg26468118		OpenSea	RAB20	NM_017817	3'UTR	IL10L10F	-0.447669	6.96e-06	4.67e-05
cg16978321	chr19	5983811	+	cg16978321		OpenSea	LOC100128568	NR_046376	Body	IL6L10F	-0.297653	7.04e-06	4.71e-05
cg13827209	chr9	101912842	+	cg13827209		OpenSea	TGFBR1;TGFBR1	NM_001130916;NM_004612	3'UTR;3'UTR	TNFR2L10F	0.74634	7.07e-06	4.72e-05
cg04364800	chr3	160653423	+	cg04364800		OpenSea	PPM1L	NM_139245	Body	IL1raL10F	-0.210708	7.1e-06	4.72e-05
cg19198358	chr8	1725179	+	cg19198358		OpenSea	CLN8	NM_018941	Body	CRPL10F	-0.0719787	7.16e-06	4.75e-05
cg24207009	chr17	76037562	-	cg24207009	chr17:76037074-76037323	S_Shore	TNRC6C;TNRC6C	NM_018996;NM_001142640	5'UTR;5'UTR	IL6L10F	0.375214	7.27e-06	4.82e-05
cg14839898	chr11	111956362	-	cg14839898	chr11:111957352-111957681	N_Shore	TIMM8B;SDHD;TIMM8B	NM_012459;NM_003002;NR_028383	Body;TSS1500;Body	IL10L10F	-0.434408	7.3e-06	4.82e-05
cg08303079	chr9	132345286	+	cg08303079		OpenSea				TNFR2L10F	-0.471634	7.33e-06	4.82e-05
cg27142757	chr1	150573467	-	cg27142757		OpenSea				IL10L10F	-0.495543	7.33e-06	4.82e-05
cg26344619	chr14	76046018	+	cg26344619	chr14:76044590-76045102	S_Shore	FLVCR2	NM_017791	Body	IL10L10F	-0.208916	7.41e-06	4.86e-05
cg02590484	chr17	38178658	-	cg02590484		OpenSea	MED24;MED24;MED24;MED24;MED24;MED24;MED24;MED24	NM_014815;NM_001267797;NM_001079518;NR_052017;NR_052017;NM_014815;NM_001267797;NM_001079518	ExonBnd;ExonBnd;ExonBnd;ExonBnd;Body;Body;Body;Body	CRPL10F	0.165774	7.49e-06	4.9e-05
cg16978321	chr19	5983811	+	cg16978321		OpenSea	LOC100128568	NR_046376	Body	TNFR2L10F	-0.535516	7.62e-06	4.97e-05
cg25198113	chr1	5743886	-	cg25198113		OpenSea				IL6L10F	0.123875	7.95e-06	5.17e-05
cg09029633	chr16	90077571	-	cg09029633		OpenSea	DBNDD1;DBNDD1;DBNDD1;DBNDD1	NM_001288708;NM_024043;NM_001042610;NM_001288709	Body;TSS1500;Body;Body	IL1raL10F	0.24082	8.06e-06	5.24e-05
cg03924136	chr20	62367108	-	cg03924136	chr20:62368955-62371962	N_Shore	LIME1;LIME1;LIME1;LIME1;ZGPAT;ZGPAT;ZGPAT;ZGPAT;ZGPAT	NM_017806;NM_001305655;NM_001305654;NM_001305654;NM_181485;NM_001195654;NM_001195653;NM_032527;NM_001083113	TSS1500;TSS1500;1stExon;5'UTR;Body;Body;Body;Body;Body	CRPL10F	0.158253	8.17e-06	5.29e-05
cg23013812	chr6	14841030	+	cg23013812		OpenSea				IL6L10F	-0.289347	8.18e-06	5.29e-05
cg26955383	chr10	105218660	-	cg26955383	chr10:105217966-105218287	S_Shore	CALHM1	NM_001001412	TSS200	TNFR2L10F	0.456572	8.21e-06	5.29e-05
cg20263249	chr1	118176170	+	cg20263249		OpenSea				CRPL10F	-0.0873797	8.32e-06	5.35e-05
cg09897881	chr15	86195808	+	cg09897881		OpenSea	AKAP13;AKAP13;AKAP13	NM_007200;NM_006738;NM_001270546	Body;Body;Body	TNFR2L10F	-0.417507	8.63e-06	5.54e-05
cg20179730	chr13	22111377	-	cg20179730		OpenSea	MICU2	NM_152726	Body	IL10L10F	-0.478507	8.7e-06	5.57e-05
cg14712766	chr15	39636986	+	cg14712766		OpenSea				IL10L10F	-0.512065	8.75e-06	5.58e-05
cg24274865	chr1	206946595	-	cg24274865		OpenSea	IL10	NM_000572	TSS1500	IL10L10F	-0.3555	8.74e-06	5.58e-05
cg26010546	chr18	52490607	-	cg26010546		OpenSea				IL10L10F	-0.454654	8.92e-06	5.67e-05
cg13304206	chr4	40562130	+	cg13304206		OpenSea	RBM47	NM_001098634	5'UTR	TNFR2L10F	-0.553773	9.01e-06	5.72e-05
cg18363226	chr7	132741882	+	cg18363226		OpenSea	CHCHD3	NM_017812	Body	IL10L10F	-0.429819	9.05e-06	5.72e-05
cg10351852	chr3	45706990	+	cg10351852		OpenSea	LIMD1	NM_014240	Body	TNFR2L10F	0.365462	9.15e-06	5.78e-05
cg07388661	chr6	158663595	-	cg07388661		OpenSea				IL6L10F	-0.244729	9.2e-06	5.78e-05
cg12644285	chr15	93570953	+	cg12644285		OpenSea	CHD2	NM_001271	3'UTR	IL6L10F	-0.22129	9.19e-06	5.78e-05
cg10597669	chr12	122294017	+	cg10597669		OpenSea	HPD;HPD	NM_001171993;NM_002150	Body;Body	TNFR2L10F	-0.249215	9.46e-06	5.92e-05
cg09029633	chr16	90077571	-	cg09029633		OpenSea	DBNDD1;DBNDD1;DBNDD1;DBNDD1	NM_001288708;NM_024043;NM_001042610;NM_001288709	Body;TSS1500;Body;Body	CRPL10F	0.100451	9.46e-06	5.92e-05
cg12285003	chr20	61596335	+	cg12285003		OpenSea	SLC17A9;SLC17A9	NM_022082;NM_001302643	Body;Body	IL10L10F	0.307455	9.49e-06	5.92e-05
cg24687529	chr1	117529954	+	cg24687529		OpenSea	PTGFRN	NM_020440	3'UTR	IL10L10F	0.395074	9.53e-06	5.93e-05
cg20127419	chr1	112289991	-	cg20127419		OpenSea	FAM212B-AS1;FAM212B-AS1;FAM212B;LOC101928718	NR_038952;NR_038951;NM_198926;NR_125963	Body;Body;Body;Body	IL6L10F	-0.226918	9.57e-06	5.95e-05
cg08001199	chr2	65058570	+	cg08001199		OpenSea				CRPL10F	-0.175233	9.62e-06	5.96e-05
cg04897299	chr6	21402890	-	cg04897299		OpenSea				TNFR2L10F	-0.565889	9.68e-06	5.99e-05
cg18170385	chr10	330411	+	cg18170385		OpenSea	DIP2C	NM_014974	Body	IL6L10F	-0.209752	9.73e-06	6e-05
cg19805943	chr2	85933069	+	cg19805943		OpenSea				IL1raL10F	-0.31857	9.78e-06	6.01e-05
cg09977703	chr19	46854563	+	cg09977703	chr19:46850185-46850678	S_Shelf	PPP5C	NM_006247	Body	CRPL10F	-0.207838	9.76e-06	6.01e-05
cg16218494	chr11	34426751	+	cg16218494		OpenSea				IL10L10F	-0.610437	9.86e-06	6.04e-05
cg21081878	chr21	38334730	-	cg21081878	chr21:38338384-38338904	N_Shelf	HLCS	NM_000411	5'UTR	IL10L10F	0.427665	9.88e-06	6.04e-05
cg13646708	chr11	102447295	+	cg13646708		OpenSea				IL10L10F	-0.629148	9.94e-06	6.06e-05
cg13257654	chr8	42946331	+	cg13257654	chr8:42948532-42948928	N_Shelf				IL10L10F	0.239558	1.01e-05	6.12e-05
cg04231870	chr11	65618874	-	cg04231870		OpenSea	SNX32;SNX32	NM_152760;NM_152760	ExonBnd;Body	IL6L10F	-0.250992	1.01e-05	6.13e-05
cg01589514	chr17	79526378	-	cg01589514		OpenSea	NPLOC4;NPLOC4;NPLOC4	NR_130140;NR_130139;NM_017921	Body;Body;Body	CRPL10F	0.0902914	1.02e-05	6.21e-05
cg21186405	chr2	103335661	+	cg21186405		OpenSea	MFSD9	NM_032718	Body	TNFR2L10F	-0.636275	1.03e-05	6.21e-05
cg23013812	chr6	14841030	+	cg23013812		OpenSea				TNFR2L10F	-0.575818	1.05e-05	6.35e-05
cg25082943	chr12	93367516	+	cg25082943		OpenSea				CRPL10F	-0.142176	1.08e-05	6.51e-05
cg10724186	chr6	160227462	+	cg10724186		OpenSea	PNLDC1;PNLDC1	NM_001271862;NM_173516	Body;Body	TNFR2L10F	-0.644049	1.09e-05	6.53e-05
cg01225452	chr4	48972831	-	cg01225452		OpenSea				IL6L10F	-0.192163	1.1e-05	6.57e-05
cg26605900	chr17	72614843	-	cg26605900		OpenSea	CD300E	NM_181449	Body	TNFR2L10F	0.289269	1.15e-05	6.87e-05
cg20804821	chr3	51988454	+	cg20804821	chr3:51989763-51990639	N_Shore	GPR62	NM_080865	TSS1500	IL10L10F	0.364023	1.17e-05	6.97e-05
cg24272019	chr14	106376379	-	cg24272019		OpenSea				TNFR2L10F	0.504301	1.17e-05	6.97e-05
cg10724186	chr6	160227462	+	cg10724186		OpenSea	PNLDC1;PNLDC1	NM_001271862;NM_173516	Body;Body	IL6L10F	-0.315871	1.18e-05	7.02e-05
cg25746149	chr11	117280371	+	cg25746149		OpenSea	CEP164;CEP164	NM_001271933;NM_014956	Body;Body	IL10L10F	-0.553415	1.19e-05	7.02e-05
cg19822755	chr16	30108259	-	cg19822755	chr16:30107511-30107875	S_Shore	YPEL3;YPEL3	NM_031477;NM_001145524	TSS1500;TSS1500	TNFR2L10F	0.569434	1.2e-05	7.04e-05
cg21069139	chr1	115091976	+	cg21069139		OpenSea				IL6L10F	-0.215256	1.2e-05	7.04e-05
cg12249789	chr21	45203404	+	cg12249789	chr21:45206579-45207051	N_Shelf				IL6L10F	-0.216301	1.2e-05	7.04e-05
cg24687529	chr1	117529954	+	cg24687529		OpenSea	PTGFRN	NM_020440	3'UTR	IL1raL10F	0.330229	1.19e-05	7.04e-05
cg23635525	chr7	133196253	+	cg23635525		OpenSea	EXOC4	NM_021807	Body	IL10L10F	-0.521943	1.2e-05	7.05e-05
cg21243269	chr16	57157904	-	cg21243269		OpenSea	CPNE2	NM_152727	Body	IL10L10F	-0.250433	1.24e-05	7.26e-05
cg00968118	chr22	43686187	-	cg00968118		OpenSea	SCUBE1	NM_173050	Body	IL6L10F	0.184612	1.24e-05	7.26e-05
cg05696969	chr5	145326228	-	cg05696969		OpenSea	SH3RF2	NM_152550	Body	IL6L10F	-0.311747	1.25e-05	7.26e-05
cg13673960	chr4	1742301	+	cg13673960		OpenSea	TACC3	NM_006342	Body	TNFR2L10F	0.37812	1.25e-05	7.26e-05
cg12800932	chr7	158611626	+	cg12800932		OpenSea	ESYT2	NM_020728	Body	CRPL10F	-0.32166	1.26e-05	7.31e-05
cg12573289	chr7	45075791	+	cg12573289		OpenSea	CCM2;CCM2;CCM2;CCM2;CCM2	NM_031443;NM_001029835;NM_001167935;NM_001167934;NR_030770	Body;Body;Body;Body;Body	IL6L10F	0.0953183	1.27e-05	7.36e-05
cg07688032	chr19	2330963	+	cg07688032	chr19:2328364-2329089	S_Shore	SPPL2B;SPPL2B	NM_001077238;NM_152988	Body;Body	IL6L10F	0.139785	1.28e-05	7.38e-05
cg26605900	chr17	72614843	-	cg26605900		OpenSea	CD300E	NM_181449	Body	CRPL10F	0.0779929	1.28e-05	7.38e-05
cg25371251	chr11	68483493	+	cg25371251		OpenSea	5	NM_004923	Body	IL10L10F	-0.398123	1.28e-05	7.38e-05
cg12955870	chr2	169888032	-	cg12955870		OpenSea	ABCB11	NM_003742	TSS200	IL10L10F	-0.349986	1.31e-05	7.5e-05
cg15034393	chr3	152856773	-	cg15034393		OpenSea				CRPL10F	-0.185139	1.34e-05	7.66e-05
cg10608465	chr19	13892443	+	cg10608465		OpenSea				IL1raL10F	-0.201438	1.42e-05	8.14e-05
cg24145401	chr1	159047177	-	cg24145401		OpenSea	AIM2	NM_004833	TSS1500	IL1raL10F	-0.639505	1.43e-05	8.18e-05
cg00568296	chr20	48675540	+	cg00568296		OpenSea				CRPL10F	0.0897767	1.44e-05	8.19e-05
cg26089920	chr18	22494802	+	cg26089920		OpenSea				CRPL10F	-0.0627006	1.44e-05	8.19e-05
cg23635525	chr7	133196253	+	cg23635525		OpenSea	EXOC4	NM_021807	Body	CRPL10F	-0.17531	1.47e-05	8.31e-05
cg11642336	chr7	30329949	+	cg11642336		OpenSea	MIR550B1;ZNRF2	NR_037513;NM_147128	TSS1500;Body	CRPL10F	-0.133449	1.49e-05	8.43e-05
cg12644285	chr15	93570953	+	cg12644285		OpenSea	CHD2	NM_001271	3'UTR	IL1raL10F	-0.287781	1.49e-05	8.43e-05
cg27218041	chr1	59953216	-	cg27218041		OpenSea	FGGY;FGGY;FGGY;FGGY	NM_018291;NM_001244714;NM_001113411;NR_103473	Body;Body;Body;Body	CRPL10F	0.0940222	1.5e-05	8.44e-05
cg06618497	chr14	102198604	-	cg06618497		OpenSea	C14orf72	NR_026774	Body	IL6L10F	-0.153722	1.5e-05	8.44e-05
cg09555736	chr16	474271	+	cg09555736	chr16:474922-476815	N_Shore	RAB11FIP3	NM_014700	TSS1500	TNFR2L10F	0.550132	1.56e-05	8.72e-05
cg08960443	chr9	140066947	-	cg08960443	chr9:140068792-140069082	N_Shore	TMEM210	NM_001282477	TSS1500	IL10L10F	0.398329	1.56e-05	8.74e-05
cg18185662	chr11	42275722	+	cg18185662		OpenSea	LOC100507205	NR_038309	TSS1500	CRPL10F	-0.10917	1.59e-05	8.85e-05
cg09298159	chr6	153302566	-	cg09298159	chr6:153303408-153304973	N_Shore	FBXO5;FBXO5	NM_012177;NM_001142522	Body;5'UTR	CRPL10F	-0.202146	1.63e-05	9.08e-05
cg08303079	chr9	132345286	+	cg08303079		OpenSea				IL6L10F	-0.225104	1.64e-05	9.09e-05
cg04415310	chr12	124743637	+	cg04415310		OpenSea	ZNF664-FAM101A	NM_001204299	5'UTR	IL10L10F	0.643658	1.65e-05	9.18e-05
cg23305420	chr11	109948734	-	cg23305420		OpenSea				IL10L10F	-0.540068	1.67e-05	9.26e-05
cg00619207	chr1	111743368	+	cg00619207	chr1:111746337-111747303	N_Shelf	DENND2D	NM_024901	TSS200	CRPL10F	-0.112146	1.69e-05	9.32e-05
cg16648387	chr1	62729617	+	cg16648387		OpenSea	KANK4	NM_181712	Body	IL10L10F	-0.529855	1.69e-05	9.32e-05
cg02156526	chr6	24934269	-	cg02156526		OpenSea	FAM65B;FAM65B	NM_001286445;NM_001286446	Body;Body	CRPL10F	-0.134237	1.69e-05	9.32e-05
cg16978321	chr19	5983811	+	cg16978321		OpenSea	LOC100128568	NR_046376	Body	CRPL10F	-0.153544	1.7e-05	9.33e-05
cg24023352	chr10	49540488	-	cg24023352		OpenSea	MAPK8	NM_001278547	5'UTR	IL10L10F	-0.780542	1.71e-05	9.37e-05
cg14839898	chr11	111956362	-	cg14839898	chr11:111957352-111957681	N_Shore	TIMM8B;SDHD;TIMM8B	NM_012459;NM_003002;NR_028383	Body;TSS1500;Body	TNFR2L10F	-0.490809	1.73e-05	9.48e-05
cg08732950	chr16	89023389	+	cg08732950		OpenSea	CBFA2T3	NM_005187	Body	CRPL10F	0.0761478	1.75e-05	9.51e-05
cg12117418	chr1	29157255	+	cg12117418		OpenSea	OPRD1	NM_000911	Body	CRPL10F	-0.0817228	1.74e-05	9.51e-05
cg08350742	chr4	40814531	-	cg08350742		OpenSea	APBB2;APBB2;APBB2;APBB2;APBB2;APBB2;APBB2	NM_001166054;NM_001166053;NM_173075;NM_001166050;NM_004307;NM_001166052;NM_001166051	3'UTR;3'UTR;3'UTR;3'UTR;3'UTR;3'UTR;3'UTR	IL1raL10F	-0.423578	1.76e-05	9.55e-05
cg24899334	chr3	167803450	+	cg24899334		OpenSea	GOLIM4;GOLIM4	NM_014498;NM_001308155	Body;Body	CRPL10F	-0.275405	1.82e-05	9.85e-05
cg24522373	chr9	92331809	-	cg24522373		OpenSea	UNQ6494	NR_024280	Body	CRPL10F	0.124444	1.84e-05	9.96e-05
cg24296397	chr3	49692537	+	cg24296397	chr3:49690022-49690329	S_Shelf	BSN	NM_003458	Body	CRPL10F	0.0862944	1.86e-05	0.000100265
cg10834218	chr20	8053963	-	cg10834218		OpenSea				TNFR2L10F	-0.654006	1.91e-05	0.000103256
cg20127419	chr1	112289991	-	cg20127419		OpenSea	FAM212B-AS1;FAM212B-AS1;FAM212B;LOC101928718	NR_038952;NR_038951;NM_198926;NR_125963	Body;Body;Body;Body	CRPL10F	-0.120672	1.92e-05	0.000103311
cg20263249	chr1	118176170	+	cg20263249		OpenSea				TNFR2L10F	-0.284116	1.93e-05	0.000103748
cg20228731	chr7	130646051	+	cg20228731		OpenSea	FLJ43663;FLJ43663	NR_015431;NR_024153	Body;Body	IL6L10F	-0.824346	1.95e-05	0.000104564
cg15528722	chr5	40756846	+	cg15528722	chr5:40755537-40756257	S_Shore	TTC33	NM_012382	TSS1500	CRPL10F	-0.167063	1.98e-05	0.000105992
cg15413523	chr5	133451625	-	cg15413523	chr5:133449320-133451260	S_Shore	TCF7;TCF7;TCF7;TCF7;TCF7;TCF7;TCF7;TCF7;TCF7;TCF7	NM_213648;NM_001134852;NM_201632;NM_201633;NM_001134851;NM_201634;NM_001134851;NM_003202;NM_213648;NM_001134852	5'UTR;1stExon;5'UTR;5'UTR;1stExon;5'UTR;5'UTR;Body;1stExon;5'UTR	IL6L10F	0.0998861	1.98e-05	0.000105992
cg10608465	chr19	13892443	+	cg10608465		OpenSea				IL6L10F	-0.151293	2.04e-05	0.0001088
cg01177100	chr3	9176211	-	cg01177100	chr3:9177691-9178189	N_Shore	SRGAP3;SRGAP3	NM_001033117;NM_014850	Body;Body	IL6L10F	0.139036	2.06e-05	0.000109652
cg02590484	chr17	38178658	-	cg02590484		OpenSea	MED24;MED24;MED24;MED24;MED24;MED24;MED24;MED24	NM_014815;NM_001267797;NM_001079518;NR_052017;NR_052017;NM_014815;NM_001267797;NM_001079518	ExonBnd;ExonBnd;ExonBnd;ExonBnd;Body;Body;Body;Body	IL6L10F	0.279093	2.08e-05	0.000110473
cg00457165	chr6	31088366	+	cg00457165		OpenSea	CDSN;PSORS1C1	NM_001264;NM_014068	TSS200;5'UTR	IL10L10F	0.279433	2.09e-05	0.000110824
cg21081878	chr21	38334730	-	cg21081878	chr21:38338384-38338904	N_Shelf	HLCS	NM_000411	5'UTR	TNFR2L10F	0.519277	2.12e-05	0.00011212
cg06618497	chr14	102198604	-	cg06618497		OpenSea	C14orf72	NR_026774	Body	TNFR2L10F	-0.290906	2.17e-05	0.000114347
cg11979298	chr3	101707603	+	cg11979298		OpenSea	LOC152225	NR_026934	Body	IL6L10F	-0.161965	2.18e-05	0.0001148
cg18170385	chr10	330411	+	cg18170385		OpenSea	DIP2C	NM_014974	Body	IL10L10F	-0.325028	2.19e-05	0.000115013
cg14195992	chr8	48265917	-	cg14195992		OpenSea	KIAA0146	NM_001080394	Body	IL10L10F	-0.421285	2.19e-05	0.000115013
cg12170419	chr20	23367377	+	cg12170419		OpenSea	NAPB;NAPB;NAPB;NAPB;NAPB	NR_104266;NM_001283026;NM_022080;NM_001283018;NM_001283020	Body;Body;Body;Body;Body	TNFR2L10F	-0.545675	2.25e-05	0.000117833
cg25488374	chr12	107799002	-	cg25488374		OpenSea	BTBD11	NM_001018072	Body	IL6L10F	-0.237349	2.26e-05	0.000118225
cg12955870	chr2	169888032	-	cg12955870		OpenSea	ABCB11	NM_003742	TSS200	TNFR2L10F	-0.408495	2.27e-05	0.000118226
cg03504306	chr19	17326697	+	cg03504306	chr19:17326114-17326551	S_Shore	USE1	NM_018467	Body	TNFR2L10F	0.227653	2.33e-05	0.000121219
cg14712766	chr15	39636986	+	cg14712766		OpenSea				IL6L10F	-0.305229	2.34e-05	0.000121529
cg16669300	chr9	134882463	-	cg16669300		OpenSea	MED27;MED27	NM_004269;NM_001253881	Body;Body	IL1raL10F	-0.368791	2.39e-05	0.000124151
cg18685080	chr16	81553347	+	cg18685080		OpenSea	CMIP;CMIP	NM_198390;NM_030629	Body;Body	TNFR2L10F	-0.364048	2.52e-05	0.00013025
cg02695372	chr7	106320126	-	cg02695372		OpenSea				IL10L10F	-0.472908	2.55e-05	0.000131793
cg06618497	chr14	102198604	-	cg06618497		OpenSea	C14orf72	NR_026774	Body	IL10L10F	-0.235697	2.56e-05	0.000131793
cg13673960	chr4	1742301	+	cg13673960		OpenSea	TACC3	NM_006342	Body	IL1raL10F	0.236331	2.57e-05	0.000132277
cg01177100	chr3	9176211	-	cg01177100	chr3:9177691-9178189	N_Shore	SRGAP3;SRGAP3	NM_001033117;NM_014850	Body;Body	CRPL10F	0.0760591	2.61e-05	0.000133845
cg17321267	chr19	5669909	+	cg17321267		OpenSea				IL10L10F	0.431967	2.62e-05	0.00013454
cg19805943	chr2	85933069	+	cg19805943		OpenSea				TNFR2L10F	-0.482822	2.69e-05	0.000137717
cg21088514	chr21	35884376	-	cg21088514		OpenSea	KCNE1	NM_000219	TSS1500	TNFR2L10F	-0.341632	2.72e-05	0.000138689
cg20559059	chr10	134178970	+	cg20559059		OpenSea	LRRC27;LRRC27;LRRC27	NM_030626;NM_001143757;NM_001309474	Body;Body;Body	IL10L10F	0.236886	2.75e-05	0.000139954
cg22409916	chr7	138426100	+	cg22409916		OpenSea	ATP6V0A4;ATP6V0A4;ATP6V0A4	NM_130841;NM_130840;NM_020632	Body;Body;Body	IL6L10F	-0.258626	2.78e-05	0.000141224
cg05708963	chr5	14583002	-	cg05708963	chr5:14581497-14582569	S_Shore	FAM105A	NM_019018	Body	TNFR2L10F	0.347483	2.79e-05	0.000141587
cg11979298	chr3	101707603	+	cg11979298		OpenSea	LOC152225	NR_026934	Body	TNFR2L10F	-0.316322	2.79e-05	0.000141587
cg05165365	chr11	48151361	+	cg05165365		OpenSea	PTPRJ;PTPRJ	NM_001098503;NM_002843	Body;Body	TNFR2L10F	-0.427879	2.82e-05	0.000142527
cg18844029	chr6	28885017	+	cg18844029		OpenSea	TRIM27	NM_006510	Body	IL6L10F	-0.303245	2.85e-05	0.000144142
cg08928261	chr4	40240766	-	cg08928261		OpenSea	RHOH;RHOH;RHOH;RHOH;RHOH;RHOH;RHOH;RHOH;RHOH;RHOH;RHOH;RHOH	NM_001278368;NM_001278367;NM_001278366;NM_001278365;NM_001278364;NM_001278369;NM_004310;NM_001278363;NM_001278362;NM_001278361;NM_001278360;NM_001278359	5'UTR;5'UTR;5'UTR;5'UTR;5'UTR;5'UTR;5'UTR;5'UTR;5'UTR;5'UTR;5'UTR;5'UTR	IL6L10F	-0.285287	2.88e-05	0.000145272
cg17466278	chr20	46391709	-	cg17466278		OpenSea	SULF2;SULF2;SULF2	NM_018837;NM_001161841;NM_198596	5'UTR;5'UTR;5'UTR	IL10L10F	0.249397	2.89e-05	0.000145637
cg03504306	chr19	17326697	+	cg03504306	chr19:17326114-17326551	S_Shore	USE1	NM_018467	Body	IL6L10F	0.110835	2.93e-05	0.000147342
cg04268643	chr17	76037239	+	cg04268643	chr17:76037074-76037323	Island	TNRC6C;TNRC6C	NM_018996;NM_001142640	5'UTR;5'UTR	TNFR2L10F	0.295091	2.98e-05	0.000149277
cg02590484	chr17	38178658	-	cg02590484		OpenSea	MED24;MED24;MED24;MED24;MED24;MED24;MED24;MED24	NM_014815;NM_001267797;NM_001079518;NR_052017;NR_052017;NM_014815;NM_001267797;NM_001079518	ExonBnd;ExonBnd;ExonBnd;ExonBnd;Body;Body;Body;Body	IL1raL10F	0.368113	2.98e-05	0.000149277
cg24145401	chr1	159047177	-	cg24145401		OpenSea	AIM2	NM_004833	TSS1500	IL10L10F	-0.76269	3e-05	0.000149862
cg00619207	chr1	111743368	+	cg00619207	chr1:111746337-111747303	N_Shelf	DENND2D	NM_024901	TSS200	IL10L10F	-0.316291	3.01e-05	0.000149952
cg19136485	chr14	106385381	-	cg19136485		OpenSea	KIAA0125	NR_026800	Body	TNFR2L10F	0.444379	3.03e-05	0.000150977
cg15528722	chr5	40756846	+	cg15528722	chr5:40755537-40756257	S_Shore	TTC33	NM_012382	TSS1500	IL10L10F	-0.4747	3.05e-05	0.000151549
cg04621850	chr9	140067121	+	cg04621850	chr9:140068792-140069082	N_Shore	TMEM210	NM_001282477	TSS1500	IL10L10F	0.352663	3.13e-05	0.000154978
cg06433467	chr5	67730071	-	cg06433467		OpenSea				CRPL10F	-0.211887	3.18e-05	0.000157569
cg02228492	chr17	14224797	-	cg02228492		OpenSea	HS3ST3B1	NM_006041	Body	IL6L10F	-0.229836	3.23e-05	0.000159601
cg26605900	chr17	72614843	-	cg26605900		OpenSea	CD300E	NM_181449	Body	IL1raL10F	0.179075	3.24e-05	0.00015992
cg26416615	chr10	63751843	+	cg26416615		OpenSea	ARID5B	NM_032199	Body	IL1raL10F	-0.488658	3.27e-05	0.000161158
cg19382191	chr7	45200201	+	cg19382191	chr7:45197181-45197807	S_Shelf	RAMP3	NM_005856	Body	IL6L10F	0.190086	3.43e-05	0.000168302
cg13659875	chr8	9045074	+	cg13659875		OpenSea	LOC101929128	NR_125431	TSS1500	CRPL10F	-0.0624427	3.54e-05	0.000173439
cg26312071	chr15	90727783	+	cg26312071	chr15:90727879-90728570	N_Shore	SEMA4B	NM_020210	TSS1500	IL6L10F	-0.21533	3.55e-05	0.000173738
cg17076667	chr10	121418050	-	cg17076667		OpenSea	BAG3	NM_004281	Body	TNFR2L10F	-0.422547	3.61e-05	0.000176596
cg04070976	chr17	73577422	+	cg04070976		OpenSea				TNFR2L10F	0.369784	3.71e-05	0.000180464
cg04903159	chr6	44202699	-	cg04903159	chr6:44205686-44205931	N_Shelf				CRPL10F	0.0763534	3.7e-05	0.000180464
cg05333174	chr22	43163057	+	cg05333174	chr22:43165947-43166287	N_Shelf				TNFR2L10F	0.630861	3.77e-05	0.00018328
cg00301390	chr17	16749537	+	cg00301390		OpenSea				IL10L10F	0.221261	3.83e-05	0.000185812
cg13538554	chr14	57050624	+	cg13538554	chr14:57046472-57046804	S_Shelf	TMEM260	NM_017799	Body	CRPL10F	-0.144622	3.95e-05	0.000191315
cg05165365	chr11	48151361	+	cg05165365		OpenSea	PTPRJ;PTPRJ	NM_001098503;NM_002843	Body;Body	IL6L10F	-0.21811	3.97e-05	0.000191878
cg21186405	chr2	103335661	+	cg21186405		OpenSea	MFSD9	NM_032718	Body	IL6L10F	-0.284587	4e-05	0.000193236
cg05165365	chr11	48151361	+	cg05165365		OpenSea	PTPRJ;PTPRJ	NM_001098503;NM_002843	Body;Body	IL10L10F	-0.351774	4.18e-05	0.000199654
cg19805943	chr2	85933069	+	cg19805943		OpenSea				IL6L10F	-0.217353	4.17e-05	0.000199654
cg04621850	chr9	140067121	+	cg04621850	chr9:140068792-140069082	N_Shore	TMEM210	NM_001282477	TSS1500	TNFR2L10F	0.428087	4.17e-05	0.000199654
cg12847371	chr19	13056058	-	cg12847371	chr19:13056458-13057125	N_Shore	RAD23A;RAD23A;RAD23A;RAD23A	NM_001270363;NM_001270362;NM_005053;NR_072976	TSS1500;TSS1500;TSS1500;TSS1500	IL1raL10F	-0.32459	4.18e-05	0.000199654
cg25501329	chr16	59934140	-	cg25501329		OpenSea	LOC101927580	NR_110917	Body	TNFR2L10F	0.584043	4.15e-05	0.000199654
cg10773266	chr10	43895225	+	cg10773266	chr10:43891546-43892917	S_Shelf	HNRNPF;HNRNPF;HNRNPF;HNRNPF	NM_001098205;NM_001098206;NM_001098204;NM_004966	5'UTR;5'UTR;5'UTR;5'UTR	IL10L10F	-0.288541	4.16e-05	0.000199654
cg06963709	chr7	155150793	+	cg06963709		OpenSea				IL10L10F	-0.496201	4.25e-05	0.000202492
cg04897299	chr6	21402890	-	cg04897299		OpenSea				IL10L10F	-0.433182	4.26e-05	0.00020279
cg03487391	chr2	219596537	-	cg03487391		OpenSea	TTLL4	NM_014640	5'UTR	CRPL10F	-0.151933	4.43e-05	0.000210366
cg16161069	chr16	442770	-	cg16161069		OpenSea	LOC100134368	NR_024453	Body	CRPL10F	0.131407	4.46e-05	0.000211211
cg03307560	chr16	28161100	-	cg03307560		OpenSea	XPO6;XPO6	NM_001270940;NM_015171	Body;Body	IL10L10F	-0.445447	4.47e-05	0.000211467
cg21081878	chr21	38334730	-	cg21081878	chr21:38338384-38338904	N_Shelf	HLCS	NM_000411	5'UTR	IL6L10F	0.243822	4.48e-05	0.000211467
cg06618497	chr14	102198604	-	cg06618497		OpenSea	C14orf72	NR_026774	Body	IL1raL10F	-0.189089	4.49e-05	0.000211786
cg02158894	chr19	17976717	-	cg02158894		OpenSea				CRPL10F	-0.0946309	4.69e-05	0.000220845
cg11807188	chr1	65924844	+	cg11807188		OpenSea	LEPR;LEPR;LEPR	NM_001003680;NM_001003679;NM_002303	5'UTR;5'UTR;5'UTR	CRPL10F	-0.0640905	4.72e-05	0.000222023
cg01837788	chr11	57315686	+	cg01837788		OpenSea	SMTNL1	NM_001105565	Body	IL10L10F	0.191815	4.75e-05	0.000222609
cg13673960	chr4	1742301	+	cg13673960		OpenSea	TACC3	NM_006342	Body	IL6L10F	0.168326	4.9e-05	0.000229674
cg17466278	chr20	46391709	-	cg17466278		OpenSea	SULF2;SULF2;SULF2	NM_018837;NM_001161841;NM_198596	5'UTR;5'UTR;5'UTR	TNFR2L10F	0.28852	4.91e-05	0.000229712
cg18544034	chr2	8626420	-	cg18544034		OpenSea				CRPL10F	-0.130017	4.96e-05	0.0002314
cg18170385	chr10	330411	+	cg18170385		OpenSea	DIP2C	NM_014974	Body	CRPL10F	-0.105388	5e-05	0.00023244
cg10243030	chr20	16156233	+	cg10243030		OpenSea				IL1raL10F	0.426205	5e-05	0.00023244
cg11558387	chr1	118139009	+	cg11558387		OpenSea				TNFR2L10F	-0.439651	5.01e-05	0.000232644
cg01589514	chr17	79526378	-	cg01589514		OpenSea	NPLOC4;NPLOC4;NPLOC4	NR_130140;NR_130139;NM_017921	Body;Body;Body	IL6L10F	0.148337	5.03e-05	0.00023292
cg09897881	chr15	86195808	+	cg09897881		OpenSea	AKAP13;AKAP13;AKAP13	NM_007200;NM_006738;NM_001270546	Body;Body;Body	IL10L10F	-0.320799	5.12e-05	0.000237115
cg26859083	chr3	55002054	-	cg26859083		OpenSea	LRTM1;CACNA2D3	NM_001304389;NM_018398	TSS1500;Body	CRPL10F	0.127881	5.15e-05	0.000238004
cg09154528	chr22	50154745	+	cg09154528	chr22:50157939-50158217	N_Shelf				CRPL10F	-0.109073	5.31e-05	0.000244806
cg09298159	chr6	153302566	-	cg09298159	chr6:153303408-153304973	N_Shore	FBXO5;FBXO5	NM_012177;NM_001142522	Body;5'UTR	TNFAL10F	-0.642582	5.32e-05	0.000244806
cg08010984	chr3	170964901	+	cg08010984		OpenSea	TNIK;TNIK;TNIK;TNIK;TNIK;TNIK;TNIK;TNIK	NM_001161560;NM_015028;NM_001161563;NM_001161562;NM_001161561;NM_001161566;NM_001161565;NM_001161564	Body;Body;Body;Body;Body;Body;Body;Body	IL10L10F	-0.335553	5.53e-05	0.00025334
cg18685080	chr16	81553347	+	cg18685080		OpenSea	CMIP;CMIP	NM_198390;NM_030629	Body;Body	IL10L10F	-0.300192	5.52e-05	0.00025334
cg04874562	chr11	5462540	+	cg04874562		OpenSea	OR51I1	NM_001005288	1stExon	IL10L10F	0.244923	5.51e-05	0.00025334
cg16961793	chr22	45624479	-	cg16961793		OpenSea	KIAA0930	NM_001009880	Body	TNFR2L10F	-0.466593	5.7e-05	0.000260495
cg10773266	chr10	43895225	+	cg10773266	chr10:43891546-43892917	S_Shelf	HNRNPF;HNRNPF;HNRNPF;HNRNPF	NM_001098205;NM_001098206;NM_001098204;NM_004966	5'UTR;5'UTR;5'UTR;5'UTR	IL6L10F	-0.175757	5.79e-05	0.000264142
cg12170419	chr20	23367377	+	cg12170419		OpenSea	NAPB;NAPB;NAPB;NAPB;NAPB	NR_104266;NM_001283026;NM_022080;NM_001283018;NM_001283020	Body;Body;Body;Body;Body	IL10L10F	-0.451678	5.82e-05	0.000265115
cg18850465	chr16	50718807	-	cg18850465		OpenSea				CRPL10F	-0.0602847	5.86e-05	0.00026664
cg00619207	chr1	111743368	+	cg00619207	chr1:111746337-111747303	N_Shelf	DENND2D	NM_024901	TSS200	TNFR2L10F	-0.366762	5.91e-05	0.000268214
cg13673960	chr4	1742301	+	cg13673960		OpenSea	TACC3	NM_006342	Body	CRPL10F	0.0935629	5.93e-05	0.000268761
cg24672565	chr3	14382884	+	cg24672565		OpenSea				IL10L10F	0.252709	5.98e-05	0.000270556
cg01900480	chr5	139068516	+	cg01900480		OpenSea				TNFR2L10F	0.299615	5.99e-05	0.000270556
cg01015210	chr5	141475540	-	cg01015210		OpenSea				IL6L10F	-0.285922	6.04e-05	0.00027257
cg18544034	chr2	8626420	-	cg18544034		OpenSea				IL10L10F	-0.374241	6.08e-05	0.000273881
cg26365581	chr1	172243209	-	cg26365581		OpenSea	DNM3;DNM3	NM_001136127;NM_015569	Body;Body	CRPL10F	-0.154336	6.13e-05	0.000275377
cg08303079	chr9	132345286	+	cg08303079		OpenSea				IL10L10F	-0.336673	6.15e-05	0.000276043
cg01589514	chr17	79526378	-	cg01589514		OpenSea	NPLOC4;NPLOC4;NPLOC4	NR_130140;NR_130139;NM_017921	Body;Body;Body	IL10L10F	0.238252	6.18e-05	0.00027711
cg16648387	chr1	62729617	+	cg16648387		OpenSea	KANK4	NM_181712	Body	CRPL10F	-0.168663	6.32e-05	0.000282602
cg18363226	chr7	132741882	+	cg18363226		OpenSea	CHCHD3	NM_017812	Body	TNFR2L10F	-0.459283	6.39e-05	0.000285227
cg04512965	chr19	6038846	-	cg04512965	chr19:6039990-6040228	N_Shore	RFX2;RFX2	NM_000635;NM_134433	Body;Body	CRPL10F	-0.0850735	6.77e-05	0.00030207
cg01271695	chr2	1719323	-	cg01271695		OpenSea	PXDN	NM_012293	Body	IL10L10F	0.274463	6.86e-05	0.000305148
cg16431791	chr19	14783092	+	cg16431791		OpenSea	ADGRE3;ADGRE3;ADGRE3	NM_032571;NM_001289159;NM_001289158	Body;Body;Body	TNFR2L10F	0.478384	6.87e-05	0.000305524
cg08714061	chr9	126908822	-	cg08714061		OpenSea				IL10L10F	-0.426131	6.96e-05	0.000308927
cg26605900	chr17	72614843	-	cg26605900		OpenSea	CD300E	NM_181449	Body	IL10L10F	0.208624	7.1e-05	0.000314545
cg01900480	chr5	139068516	+	cg01900480		OpenSea				IL10L10F	0.243365	7.18e-05	0.000317348
cg12847371	chr19	13056058	-	cg12847371	chr19:13056458-13057125	N_Shore	RAD23A;RAD23A;RAD23A;RAD23A	NM_001270363;NM_001270362;NM_005053;NR_072976	TSS1500;TSS1500;TSS1500;TSS1500	TNFR2L10F	-0.472262	7.2e-05	0.000318064
cg05422993	chr19	46526863	+	cg05422993	chr19:46526046-46526334	S_Shore	PGLYRP1	NM_005091	TSS1500	IL10L10F	-0.355097	7.23e-05	0.000318842
cg09304470	chr18	76916901	-	cg09304470		OpenSea	ATP9B;ATP9B	NM_198531;NM_001306085	Body;Body	IL10L10F	-0.509867	7.26e-05	0.000318922
cg09977703	chr19	46854563	+	cg09977703	chr19:46850185-46850678	S_Shelf	PPP5C	NM_006247	Body	TNFR2L10F	-0.716502	7.26e-05	0.000318922
cg12847371	chr19	13056058	-	cg12847371	chr19:13056458-13057125	N_Shore	RAD23A;RAD23A;RAD23A;RAD23A	NM_001270363;NM_001270362;NM_005053;NR_072976	TSS1500;TSS1500;TSS1500;TSS1500	IL6L10F	-0.241429	7.31e-05	0.00032019
cg15177686	chr4	185828927	-	cg15177686		OpenSea				IL10L10F	-0.303627	7.31e-05	0.00032019
cg22895728	chr12	93531972	-	cg22895728		OpenSea	LOC643339	NR_040096	Body	TNFR2L10F	-0.467259	7.45e-05	0.000325593
cg26977749	chr7	98477833	+	cg26977749	chr7:98476004-98476954	S_Shore	TRRAP;TRRAP;MIR3609	NM_001244580;NM_003496;NR_037403	5'UTR;5'UTR;TSS1500	IL6L10F	0.189377	7.62e-05	0.000332836
cg08074885	chr15	39746976	+	cg08074885		OpenSea				IL1raL10F	-0.378805	8.03e-05	0.000349921
cg10773266	chr10	43895225	+	cg10773266	chr10:43891546-43892917	S_Shelf	HNRNPF;HNRNPF;HNRNPF;HNRNPF	NM_001098205;NM_001098206;NM_001098204;NM_004966	5'UTR;5'UTR;5'UTR;5'UTR	CRPL10F	-0.0960897	8.08e-05	0.000351674
cg01297684	chr12	56069634	+	cg01297684		OpenSea				TNFR2L10F	-0.911693	8.16e-05	0.000354123
cg26256135	chr10	14608422	+	cg26256135		OpenSea	FAM107B;FAM107B;FAM107B;FAM107B;FAM107B;FAM107B;FAM107B;FAM107B;FAM107B;FAM107B	NM_001282701;NM_001282698;NM_001282702;NM_001282699;NM_001282703;NM_001282700;NM_001282697;NM_001282696;NM_031453;NM_001282695	5'UTR;5'UTR;5'UTR;5'UTR;5'UTR;5'UTR;5'UTR;5'UTR;Body;5'UTR	TNFR2L10F	-0.412864	8.18e-05	0.000354123
cg22594985	chr5	153457958	-	cg22594985		OpenSea				IL6L10F	0.28535	8.17e-05	0.000354123
cg11226378	chr1	97990981	-	cg11226378		OpenSea	DPYD	NM_000110	Body	CRPL10F	-0.102751	8.2e-05	0.000354418
cg27119904	chr13	114814333	-	cg27119904	chr13:114813942-114814457	Island	RASA3	NM_007368	Body	IL6L10F	0.130186	8.21e-05	0.000354496
cg19225696	chr1	201487263	+	cg19225696		OpenSea				IL10L10F	-0.378712	8.25e-05	0.000354783
cg00568296	chr20	48675540	+	cg00568296		OpenSea				IL10L10F	0.237368	8.24e-05	0.000354783
cg10545338	chr8	48556968	-	cg10545338		OpenSea	SPIDR;SPIDR;SPIDR;SPIDR	NR_104581;NM_001080394;NM_001282916;NM_001282919	Body;Body;Body;Body	TNFR2L10F	-0.346469	8.27e-05	0.000355111
cg10636246	chr1	159046973	+	cg10636246		OpenSea	AIM2	NM_004833	TSS1500	IL1raL10F	-0.52895	8.38e-05	0.000359598
cg21186405	chr2	103335661	+	cg21186405		OpenSea	MFSD9	NM_032718	Body	IL10L10F	-0.439261	8.44e-05	0.000361253
cg23305420	chr11	109948734	-	cg23305420		OpenSea				CRPL10F	-0.168677	8.45e-05	0.000361253
cg06750745	chr4	184181896	-	cg06750745		OpenSea	WWC2	NM_024949	Body	CRPL10F	-0.110643	8.52e-05	0.000363859
cg24521685	chr4	185748534	-	cg24521685	chr4:185746557-185747827	S_Shore	ACSL1;ACSL1	NM_001286711;NM_001995	TSS1500;TSS1500	IL10L10F	-0.248006	8.55e-05	0.000364423
cg21088514	chr21	35884376	-	cg21088514		OpenSea	KCNE1	NM_000219	TSS1500	CRPL10F	-0.0883256	8.58e-05	0.000365297
cg01225452	chr4	48972831	-	cg01225452		OpenSea				CRPL10F	-0.0937342	8.82e-05	0.000374858
cg23013812	chr6	14841030	+	cg23013812		OpenSea				IL10L10F	-0.41185	8.88e-05	0.000376492
cg04874562	chr11	5462540	+	cg04874562		OpenSea	OR51I1	NM_001005288	1stExon	CRPL10F	0.0817408	8.92e-05	0.000377809
cg19526722	chr1	89061160	-	cg19526722		OpenSea	PKN2-AS1	NR_110682	Body	IL6L10F	-0.261493	9.03e-05	0.000382027
cg03768345	chr14	103027280	+	cg03768345		OpenSea				TNFR2L10F	0.286988	9.11e-05	0.000384056
cg04897299	chr6	21402890	-	cg04897299		OpenSea				IL6L10F	-0.260681	9.11e-05	0.000384056
cg24023352	chr10	49540488	-	cg24023352		OpenSea	MAPK8	NM_001278547	5'UTR	CRPL10F	-0.242774	9.51e-05	0.000400333
cg21069139	chr1	115091976	+	cg21069139		OpenSea				TNFR2L10F	-0.370455	9.59e-05	0.000403096
cg03047995	chr14	24601588	+	cg03047995	chr14:24601498-24601700	Island	FITM1	NM_203402	Body	IL6L10F	0.153923	9.75e-05	0.000409265
cg10545338	chr8	48556968	-	cg10545338		OpenSea	SPIDR;SPIDR;SPIDR;SPIDR	NR_104581;NM_001080394;NM_001282916;NM_001282919	Body;Body;Body;Body	IL6L10F	-0.187333	0.000100506	0.000420288
cg06170374	chr11	37533403	-	cg06170374		OpenSea				TNFR2L10F	-0.424136	0.000100352	0.000420288
cg03487391	chr2	219596537	-	cg03487391		OpenSea	TTLL4	NM_014640	5'UTR	IL6L10F	-0.260161	0.000100639	0.000420288
cg14195992	chr8	48265917	-	cg14195992		OpenSea	KIAA0146	NM_001080394	Body	TNFR2L10F	-0.43244	0.000103117	0.000429973
cg06750745	chr4	184181896	-	cg06750745		OpenSea	WWC2	NM_024949	Body	IL6L10F	-0.200216	0.000104366	0.00043384
cg15341132	chr15	91499023	-	cg15341132	chr15:91497994-91498615	S_Shore	RCCD1;RCCD1;RCCD1	NM_033544;NM_001017919;NM_033544	5'UTR;5'UTR;ExonBnd	TNFR2L10F	-0.307413	0.000104349	0.00043384
cg10241823	chr17	841205	+	cg10241823		OpenSea	NXN	NM_022463	Body	TNFR2L10F	0.29596	0.000104706	0.000434586
cg05316065	chr8	130799007	-	cg05316065		OpenSea	GSDMC;GSDMC	NM_031415;NM_031415	1stExon;5'UTR	IL1raL10F	-0.202244	0.000106312	0.000440574
cg12573289	chr7	45075791	+	cg12573289		OpenSea	CCM2;CCM2;CCM2;CCM2;CCM2	NM_031443;NM_001029835;NM_001167935;NM_001167934;NR_030770	Body;Body;Body;Body;Body	CRPL10F	0.0474156	0.000106702	0.000441516
cg16713588	chr17	62274272	+	cg16713588		OpenSea	TEX2;TEX2;TEX2	NM_001288733;NM_001288732;NM_018469	Body;Body;Body	IL10L10F	-0.29609	0.000107266	0.00044317
cg01795822	chr1	10528093	-	cg01795822		OpenSea	DFFA;DFFA	NM_004401;NM_213566	Body;Body	IL10L10F	0.360384	0.000107453	0.000443262
cg01225452	chr4	48972831	-	cg01225452		OpenSea				TNFR2L10F	-0.316413	0.000108784	0.000448072
cg20559059	chr10	134178970	+	cg20559059		OpenSea	LRRC27;LRRC27;LRRC27	NM_030626;NM_001143757;NM_001309474	Body;Body;Body	TNFR2L10F	0.272593	0.000109053	0.000448493
cg14712766	chr15	39636986	+	cg14712766		OpenSea				IL1raL10F	-0.38157	0.000110488	0.000453019
cg12285003	chr20	61596335	+	cg12285003		OpenSea	SLC17A9;SLC17A9	NM_022082;NM_001302643	Body;Body	CRPL10F	0.0931238	0.000110362	0.000453019
cg16419027	chr13	76033339	-	cg16419027		OpenSea	TBC1D4;TBC1D4;TBC1D4	NM_014832;NM_001286658;NM_001286659	Body;Body;Body	IL6L10F	-0.176598	0.000111469	0.000456346
cg06170374	chr11	37533403	-	cg06170374		OpenSea				IL6L10F	-0.208002	0.000111883	0.000457349
cg26073844	chr8	130799093	+	cg26073844		OpenSea	GSDMC;GSDMC	NM_031415;NM_031415	1stExon;5'UTR	TNFR2L10F	-0.29967	0.000112475	0.000459077
cg09029633	chr16	90077571	-	cg09029633		OpenSea	DBNDD1;DBNDD1;DBNDD1;DBNDD1	NM_001288708;NM_024043;NM_001042610;NM_001288709	Body;TSS1500;Body;Body	IL6L10F	0.157498	0.00011494	0.000468303
cg05422993	chr19	46526863	+	cg05422993	chr19:46526046-46526334	S_Shore	PGLYRP1	NM_005091	TSS1500	TNFR2L10F	-0.427075	0.000115083	0.000468303
cg01795822	chr1	10528093	-	cg01795822		OpenSea	DFFA;DFFA	NM_004401;NM_213566	Body;Body	TNFR2L10F	0.439647	0.000116705	0.00047348
cg14104280	chr10	82363213	-	cg14104280		OpenSea	SH2D4B;SH2D4B	NM_207372;NM_001145719	Body;Body	TNFR2L10F	-0.5297	0.000116584	0.00047348
cg07688032	chr19	2330963	+	cg07688032	chr19:2328364-2329089	S_Shore	SPPL2B;SPPL2B	NM_001077238;NM_152988	Body;Body	IL10L10F	0.200731	0.000118698	0.000480843
cg16545370	chr18	42475531	+	cg16545370		OpenSea	SETBP1	NM_015559	Body	TNFR2L10F	-0.394901	0.000118905	0.00048096
cg18544034	chr2	8626420	-	cg18544034		OpenSea				IL6L10F	-0.224432	0.00012065	0.000487288
cg09298159	chr6	153302566	-	cg09298159	chr6:153303408-153304973	N_Shore	FBXO5;FBXO5	NM_012177;NM_001142522	Body;5'UTR	IL10L10F	-0.525349	0.000123422	0.00049774
cg11993828	chr4	38525620	+	cg11993828		OpenSea	LINC01258	NR_110951	TSS1500	IL10L10F	-0.544614	0.000125201	0.000504162
cg20320863	chr12	89575415	-	cg20320863		OpenSea				TNFR2L10F	-0.500408	0.000125447	0.0005044
cg27310092	chr1	151945663	-	cg27310092		OpenSea				IL1raL10F	-0.362926	0.00012597	0.000505751
cg13978081	chr6	116952796	+	cg13978081		OpenSea	RSPH4A;RSPH4A	NM_001161664;NM_001010892	Body;Body	TNFR2L10F	0.275937	0.000127865	0.000512596
cg03337382	chr10	125960385	+	cg03337382		OpenSea				IL10L10F	-0.357798	0.000128644	0.000514956
cg00218114	chr1	65157404	+	cg00218114		OpenSea	CACHD1;CACHD1	NM_001293274;NM_020925	3'UTR;3'UTR	TNFR2L10F	-0.431517	0.000130292	0.000520014
cg17562163	chr15	58777264	-	cg17562163		OpenSea	LOC101928694;LIPC	NR_120338;NM_000236	Body;Body	CRPL10F	-0.0799429	0.000130268	0.000520014
cg06092244	chr2	48796151	-	cg06092244		OpenSea	STON1-GTF2A1L	NM_172311	TSS200	IL1raL10F	-0.537241	0.000131459	0.000523897
cg18765405	chr5	134644263	-	cg18765405		OpenSea				IL10L10F	-0.374841	0.000133708	0.000532075
cg24331727	chr11	16213327	-	cg24331727		OpenSea	SOX6;SOX6;SOX6;SOX6	NM_001145811;NM_033326;NM_017508;NM_001145819	Body;Body;Body;Body	IL10L10F	0.212575	0.000134639	0.000534993
cg22409916	chr7	138426100	+	cg22409916		OpenSea	ATP6V0A4;ATP6V0A4;ATP6V0A4	NM_130841;NM_130840;NM_020632	Body;Body;Body	IL10L10F	-0.381428	0.000137848	0.000546941
cg12285003	chr20	61596335	+	cg12285003		OpenSea	SLC17A9;SLC17A9	NM_022082;NM_001302643	Body;Body	IL6L10F	0.165088	0.00014048	0.00055656
cg08960443	chr9	140066947	-	cg08960443	chr9:140068792-140069082	N_Shore	TMEM210	NM_001282477	TSS1500	IL6L10F	0.216824	0.000140685	0.00055656
cg18330082	chr10	134983749	+	cg18330082	chr10:134980302-134981059	S_Shelf	KNDC1	NM_152643	Body	IL10L10F	0.303523	0.000143974	0.000568738
cg09062752	chr9	71443046	-	cg09062752		OpenSea	PIP5K1B;PIP5K1B	NM_003558;NM_001278253	Body;Body	TNFR2L10F	-0.37594	0.000147569	0.00058209
cg15150970	chr2	25473529	-	cg15150970	chr2:25474757-25475598	N_Shore	DNMT3A;DNMT3A;DNMT3A	NM_022552;NM_175629;NM_153759	Body;Body;Body	IL6L10F	0.093247	0.000148468	0.000584781
cg01589514	chr17	79526378	-	cg01589514		OpenSea	NPLOC4;NPLOC4;NPLOC4	NR_130140;NR_130139;NM_017921	Body;Body;Body	TNFR2L10F	0.282047	0.000149601	0.000588387
cg06963709	chr7	155150793	+	cg06963709		OpenSea				IL6L10F	-0.28217	0.000150234	0.000590017
cg14216476	chr3	129636326	+	cg14216476		OpenSea				IL1raL10F	0.369105	0.000151643	0.000593216
cg26468118	chr13	111175670	-	cg26468118		OpenSea	RAB20	NM_017817	3'UTR	IL6L10F	-0.233479	0.000151349	0.000593216
cg20804821	chr3	51988454	+	cg20804821	chr3:51989763-51990639	N_Shore	GPR62	NM_080865	TSS1500	TNFR2L10F	0.383346	0.000151707	0.000593216
cg09304470	chr18	76916901	-	cg09304470		OpenSea	ATP9B;ATP9B	NM_198531;NM_001306085	Body;Body	CRPL10F	-0.167214	0.00015205	0.000593699
cg25746149	chr11	117280371	+	cg25746149		OpenSea	CEP164;CEP164	NM_001271933;NM_014956	Body;Body	CRPL10F	-0.164003	0.000152559	0.000594397
cg05859409	chr11	1799685	+	cg05859409		OpenSea				TNFR2L10F	-0.439664	0.000152669	0.000594397
cg06170374	chr11	37533403	-	cg06170374		OpenSea				CRPL10F	-0.114531	0.000153322	0.000595223
cg21243269	chr16	57157904	-	cg21243269		OpenSea	CPNE2	NM_152727	Body	TNFR2L10F	-0.272778	0.000153273	0.000595223
cg20320863	chr12	89575415	-	cg20320863		OpenSea				IL6L10F	-0.263643	0.00015401	0.000597036
cg16060189	chr10	94350577	+	cg16060189	chr10:94351356-94351615	N_Shore				CRPL10F	0.0865316	0.000154338	0.000597453
cg03504306	chr19	17326697	+	cg03504306	chr19:17326114-17326551	S_Shore	USE1	NM_018467	Body	IL1raL10F	0.133336	0.000159098	0.000614995
cg08010984	chr3	170964901	+	cg08010984		OpenSea	TNIK;TNIK;TNIK;TNIK;TNIK;TNIK;TNIK;TNIK	NM_001161560;NM_015028;NM_001161563;NM_001161562;NM_001161561;NM_001161566;NM_001161565;NM_001161564	Body;Body;Body;Body;Body;Body;Body;Body	TNFR2L10F	-0.388547	0.000160441	0.000619302
cg24207009	chr17	76037562	-	cg24207009	chr17:76037074-76037323	S_Shore	TNRC6C;TNRC6C	NM_018996;NM_001142640	5'UTR;5'UTR	CRPL10F	0.178316	0.000161325	0.000621825
cg05333174	chr22	43163057	+	cg05333174	chr22:43165947-43166287	N_Shelf				IL6L10F	0.275842	0.000162451	0.000625274
cg01183122	chr21	35884348	-	cg01183122		OpenSea	KCNE1	NM_000219	TSS1500	IL10L10F	-0.275334	0.000162727	0.000625447
cg13827209	chr9	101912842	+	cg13827209		OpenSea	TGFBR1;TGFBR1	NM_001130916;NM_004612	3'UTR;3'UTR	IL10L10F	0.523222	0.000164322	0.000630679
cg19225696	chr1	201487263	+	cg19225696		OpenSea				CRPL10F	-0.12295	0.000164716	0.000631296
cg24023352	chr10	49540488	-	cg24023352		OpenSea	MAPK8	NM_001278547	5'UTR	IL6L10F	-0.423703	0.000165065	0.000631734
cg27339271	chr10	90553647	-	cg27339271		OpenSea				CRPL10F	-0.150138	0.000167697	0.0006409
cg11993828	chr4	38525620	+	cg11993828		OpenSea	LINC01258	NR_110951	TSS1500	CRPL10F	-0.182685	0.000168303	0.00064231
cg01271695	chr2	1719323	-	cg01271695		OpenSea	PXDN	NM_012293	Body	IL6L10F	0.157039	0.000170641	0.000650314
cg16419027	chr13	76033339	-	cg16419027		OpenSea	TBC1D4;TBC1D4;TBC1D4	NM_014832;NM_001286658;NM_001286659	Body;Body;Body	TNFR2L10F	-0.3356	0.00017287	0.000657879
cg12170419	chr20	23367377	+	cg12170419		OpenSea	NAPB;NAPB;NAPB;NAPB;NAPB	NR_104266;NM_001283026;NM_022080;NM_001283018;NM_001283020	Body;Body;Body;Body;Body	IL1raL10F	-0.337033	0.000173603	0.000659741
cg19821297	chr19	12890029	-	cg19821297	chr19:12889083-12889343	S_Shore				IL1raL10F	-0.259113	0.000175089	0.000664454
cg10351852	chr3	45706990	+	cg10351852		OpenSea	LIMD1	NM_014240	Body	IL6L10F	0.145485	0.000175607	0.000664553
cg08001199	chr2	65058570	+	cg08001199		OpenSea				IL10L10F	-0.433883	0.000175561	0.000664553
cg22594985	chr5	153457958	-	cg22594985		OpenSea				CRPL10F	0.151646	0.000176028	0.000665212
cg26456810	chr17	42002103	+	cg26456810		OpenSea				TNFR2L10F	-0.188243	0.000176559	0.00066629
cg10351852	chr3	45706990	+	cg10351852		OpenSea	LIMD1	NM_014240	Body	CRPL10F	0.0822948	0.00017908	0.000674858
cg10597669	chr12	122294017	+	cg10597669		OpenSea	HPD;HPD	NM_001171993;NM_002150	Body;Body	IL6L10F	-0.108085	0.000179887	0.000676957
cg17774776	chr5	6638536	+	cg17774776		OpenSea	SRD5A1	NM_001047	Body	TNFR2L10F	-0.509929	0.000180838	0.000679032
cg24016995	chr10	129868149	+	cg24016995		OpenSea	PTPRE;PTPRE	NM_130435;NM_006504	Body;Body	IL10L10F	-0.289409	0.000180941	0.000679032
cg00301390	chr17	16749537	+	cg00301390		OpenSea				TNFR2L10F	0.27475	0.000184845	0.000692721
cg24331727	chr11	16213327	-	cg24331727		OpenSea	SOX6;SOX6;SOX6;SOX6	NM_001145811;NM_033326;NM_017508;NM_001145819	Body;Body;Body;Body	IL6L10F	0.127827	0.000189344	0.000708598
cg02300329	chr14	55574999	-	cg02300329		OpenSea				IL10L10F	-0.271903	0.000193514	0.0007232
cg09536564	chr1	221467746	-	cg09536564		OpenSea				IL6L10F	-0.200803	0.000197051	0.000735401
cg26010546	chr18	52490607	-	cg26010546		OpenSea				TNFR2L10F	-0.462285	0.000199524	0.000743607
cg20179730	chr13	22111377	-	cg20179730		OpenSea	MICU2	NM_152726	Body	IL6L10F	-0.246614	0.000202524	0.000753746
cg12772487	chr20	33145872	-	cg12772487	chr20:33146135-33147318	N_Shore	MAP1LC3A;MAP1LC3A	NM_032514;NM_181509	TSS1500;Body	IL10L10F	0.191506	0.000203264	0.000754421
cg04903159	chr6	44202699	-	cg04903159	chr6:44205686-44205931	N_Shelf				TNFR2L10F	0.261963	0.000203044	0.000754421
cg17930583	chr6	29591082	+	cg17930583		OpenSea	GABBR1;GABBR1;GABBR1	NM_021904;NM_021903;NM_001470	Body;Body;Body	CRPL10F	-0.067038	0.000204814	0.00075835
cg18844029	chr6	28885017	+	cg18844029		OpenSea	TRIM27	NM_006510	Body	TNFR2L10F	-0.602352	0.000204884	0.00075835
cg12955870	chr2	169888032	-	cg12955870		OpenSea	ABCB11	NM_003742	TSS200	CRPL10F	-0.102288	0.000206083	0.000761745
cg07388661	chr6	158663595	-	cg07388661		OpenSea				CRPL10F	-0.112028	0.000206519	0.000762316
cg19163210	chr15	69599744	+	cg19163210		OpenSea	PAQR5	NM_017705	5'UTR	IL6L10F	0.0830878	0.000208231	0.000767587
cg21088514	chr21	35884376	-	cg21088514		OpenSea	KCNE1	NM_000219	TSS1500	IL6L10F	-0.150272	0.000210406	0.000774545
cg05092891	chr21	37535885	-	cg05092891		OpenSea	DOPEY2	NM_005128	TSS1500	IL10L10F	-0.342801	0.000212646	0.000781726
cg14187619	chr2	239343111	+	cg14187619	chr2:239344401-239344627	N_Shore	ASB1	NM_001040445	Body	IL10L10F	-0.472678	0.000217793	0.00079956
cg07688032	chr19	2330963	+	cg07688032	chr19:2328364-2329089	S_Shore	SPPL2B;SPPL2B	NM_001077238;NM_152988	Body;Body	CRPL10F	0.0656149	0.000223096	0.000817919
cg02300329	chr14	55574999	-	cg02300329		OpenSea				TNFR2L10F	-0.316344	0.000223735	0.000819148
cg21088514	chr21	35884376	-	cg21088514		OpenSea	KCNE1	NM_000219	TSS1500	IL10L10F	-0.241304	0.000229502	0.000839128
cg20703242	chr1	230279135	+	cg20703242		OpenSea	GALNT2	NM_004481	Body	IL1raL10F	0.164068	0.000231612	0.000844187
cg18146146	chr19	47247380	+	cg18146146	chr19:47248749-47249948	N_Shore	STRN4;STRN4	NM_001039877;NM_013403	Body;Body	CRPL10F	-0.146669	0.000231823	0.000844187
cg18403006	chr8	130695235	-	cg18403006		OpenSea				IL10L10F	-0.18498	0.000231576	0.000844187
cg05422993	chr19	46526863	+	cg05422993	chr19:46526046-46526334	S_Shore	PGLYRP1	NM_005091	TSS1500	CRPL10F	-0.113332	0.000232618	0.000845941
cg24854225	chr1	185374534	+	cg24854225		OpenSea				TNFR2L10F	-0.526555	0.000238462	0.000864866
cg08714061	chr9	126908822	-	cg08714061		OpenSea				CRPL10F	-0.135768	0.000238218	0.000864866
cg06019998	chr17	15845440	-	cg06019998	chr17:15847757-15849513	N_Shelf				IL1raL10F	-0.54214	0.000240035	0.000869404
cg03216966	chr7	733282	-	cg03216966		OpenSea	PRKAR1B;PRKAR1B;PRKAR1B;PRKAR1B;PRKAR1B;PRKAR1B	NM_001164759;NM_001164762;NM_001164758;NM_001164760;NM_001164761;NM_002735	Body;Body;Body;Body;Body;Body	TNFR2L10F	-0.458848	0.000240882	0.000871301
cg22066978	chr5	55350682	+	cg22066978		OpenSea				CRPL10F	-0.107266	0.000245933	0.000887725
cg08001199	chr2	65058570	+	cg08001199		OpenSea				IL6L10F	-0.263738	0.000246079	0.000887725
cg26256135	chr10	14608422	+	cg26256135		OpenSea	FAM107B;FAM107B;FAM107B;FAM107B;FAM107B;FAM107B;FAM107B;FAM107B;FAM107B;FAM107B	NM_001282701;NM_001282698;NM_001282702;NM_001282699;NM_001282703;NM_001282700;NM_001282697;NM_001282696;NM_031453;NM_001282695	5'UTR;5'UTR;5'UTR;5'UTR;5'UTR;5'UTR;5'UTR;5'UTR;Body;5'UTR	IL6L10F	-0.20062	0.000247987	0.000893416
cg09536564	chr1	221467746	-	cg09536564		OpenSea				IL10L10F	-0.31161	0.00025118	0.000903712
cg08830689	chr6	138062303	+	cg08830689		OpenSea				IL10L10F	-0.372657	0.00025286	0.000908547
cg24521685	chr4	185748534	-	cg24521685	chr4:185746557-185747827	S_Shore	ACSL1;ACSL1	NM_001286711;NM_001995	TSS1500;TSS1500	IL6L10F	-0.143594	0.000254379	0.000912792
cg12644285	chr15	93570953	+	cg12644285		OpenSea	CHD2	NM_001271	3'UTR	IL1BL10F	-0.327933	0.000257145	0.000921493
cg21081878	chr21	38334730	-	cg21081878	chr21:38338384-38338904	N_Shelf	HLCS	NM_000411	5'UTR	IL1raL10F	0.290045	0.000258603	0.000925492
cg17774776	chr5	6638536	+	cg17774776		OpenSea	SRD5A1	NM_001047	Body	IL6L10F	-0.23	0.000260044	0.000929418
cg16218494	chr11	34426751	+	cg16218494		OpenSea				IL6L10F	-0.313849	0.000266353	0.000950708
cg14839898	chr11	111956362	-	cg14839898	chr11:111957352-111957681	N_Shore	TIMM8B;SDHD;TIMM8B	NM_012459;NM_003002;NR_028383	Body;TSS1500;Body	CRPL10F	-0.120648	0.000266707	0.000950715
cg19198358	chr8	1725179	+	cg19198358		OpenSea	CLN8	NM_018941	Body	TNFR2L10F	-0.199552	0.000268311	0.000955173
cg20127419	chr1	112289991	-	cg20127419		OpenSea	FAM212B-AS1;FAM212B-AS1;FAM212B;LOC101928718	NR_038952;NR_038951;NM_198926;NR_125963	Body;Body;Body;Body	IL10L10F	-0.302383	0.00027076	0.000962622
cg14214717	chr20	5466839	-	cg14214717		OpenSea				TNFR2L10F	0.206717	0.000271253	0.000963107
cg10724186	chr6	160227462	+	cg10724186		OpenSea	PNLDC1;PNLDC1	NM_001271862;NM_173516	Body;Body	CRPL10F	-0.148386	0.000272463	0.000964869
cg00218114	chr1	65157404	+	cg00218114		OpenSea	CACHD1;CACHD1	NM_001293274;NM_020925	3'UTR;3'UTR	CRPL10F	-0.11968	0.000272232	0.000964869
cg03216966	chr7	733282	-	cg03216966		OpenSea	PRKAR1B;PRKAR1B;PRKAR1B;PRKAR1B;PRKAR1B;PRKAR1B	NM_001164759;NM_001164762;NM_001164758;NM_001164760;NM_001164761;NM_002735	Body;Body;Body;Body;Body;Body	IL6L10F	-0.236547	0.000275625	0.00097479
cg13827596	chr1	185298424	+	cg13827596		OpenSea	GS1-279B7.1	NR_038424	Body	IL1raL10F	-0.211206	0.000276776	0.000977581
cg19382191	chr7	45200201	+	cg19382191	chr7:45197181-45197807	S_Shelf	RAMP3	NM_005856	Body	CRPL10F	0.0930359	0.000277698	0.000979557
cg24672565	chr3	14382884	+	cg24672565		OpenSea				IL6L10F	0.142131	0.000279217	0.00098363
cg08917665	chr12	9861036	-	cg08917665		OpenSea				CRPL10F	-0.0992333	0.000281046	0.000988784
cg01900480	chr5	139068516	+	cg01900480		OpenSea				CRPL10F	0.07595	0.000284116	0.000998285
cg16961793	chr22	45624479	-	cg16961793		OpenSea	KIAA0930	NM_001009880	Body	IL1raL10F	-0.281426	0.000285666	0.00100243
cg15033511	chr17	54994023	+	cg15033511	chr17:54990832-54991771	S_Shelf				IL6L10F	-0.133994	0.000289315	0.00101392
cg19561181	chr20	56794558	-	cg19561181		OpenSea	ANKRD60	NM_001304369	Body	TNFR2L10F	-0.405575	0.000291681	0.00102088
cg08010984	chr3	170964901	+	cg08010984		OpenSea	TNIK;TNIK;TNIK;TNIK;TNIK;TNIK;TNIK;TNIK	NM_001161560;NM_015028;NM_001161563;NM_001161562;NM_001161561;NM_001161566;NM_001161565;NM_001161564	Body;Body;Body;Body;Body;Body;Body;Body	IL6L10F	-0.187961	0.000294881	0.00102942
cg13304206	chr4	40562130	+	cg13304206		OpenSea	RBM47	NM_001098634	5'UTR	IL6L10F	-0.243169	0.000294854	0.00102942
cg24272019	chr14	106376379	-	cg24272019		OpenSea				IL10L10F	0.32234	0.00029865	0.00104123
cg05708963	chr5	14583002	-	cg05708963	chr5:14581497-14582569	S_Shore	FAM105A	NM_019018	Body	IL6L10F	0.144361	0.000299764	0.00104377
cg21243269	chr16	57157904	-	cg21243269		OpenSea	CPNE2	NM_152727	Body	CRPL10F	-0.0709153	0.000302482	0.00105188
cg08663999	chr3	150089701	-	cg08663999		OpenSea				CRPL10F	-0.115151	0.000304668	0.00105812
cg00457165	chr6	31088366	+	cg00457165		OpenSea	CDSN;PSORS1C1	NM_001264;NM_014068	TSS200;5'UTR	IL6L10F	0.145546	0.000308678	0.00106929
cg05859409	chr11	1799685	+	cg05859409		OpenSea				IL6L10F	-0.222782	0.000308486	0.00106929
cg10724186	chr6	160227462	+	cg10724186		OpenSea	PNLDC1;PNLDC1	NM_001271862;NM_173516	Body;Body	IL1raL10F	-0.347532	0.000311243	0.0010768
cg18765405	chr5	134644263	-	cg18765405		OpenSea				IL6L10F	-0.22035	0.000313975	0.00108486
cg10545338	chr8	48556968	-	cg10545338		OpenSea	SPIDR;SPIDR;SPIDR;SPIDR	NR_104581;NM_001080394;NM_001282916;NM_001282919	Body;Body;Body;Body	CRPL10F	-0.0939956	0.000314543	0.00108544
cg08303079	chr9	132345286	+	cg08303079		OpenSea				IL1raL10F	-0.250674	0.000320159	0.00110341
cg15818109	chr6	33142006	-	cg15818109		OpenSea	COL11A2;COL11A2;COL11A2	NM_080679;NM_080681;NM_080680	Body;Body;Body	IL6L10F	0.129219	0.000321341	0.00110607
cg17823346	chr10	80848143	-	cg17823346		OpenSea	ZMIZ1	NM_020338	5'UTR	IL10L10F	0.198034	0.000322845	0.00110983
cg25746149	chr11	117280371	+	cg25746149		OpenSea	CEP164;CEP164	NM_001271933;NM_014956	Body;Body	TNFR2L10F	-0.545914	0.00032431	0.00111204
cg14104280	chr10	82363213	-	cg14104280		OpenSea	SH2D4B;SH2D4B	NM_207372;NM_001145719	Body;Body	IL6L10F	-0.262973	0.000324095	0.00111204
cg00457165	chr6	31088366	+	cg00457165		OpenSea	CDSN;PSORS1C1	NM_001264;NM_014068	TSS200;5'UTR	TNFR2L10F	0.321005	0.000330088	0.00113042
cg11604811	chr4	26206130	-	cg11604811		OpenSea				CRPL10F	-0.14587	0.000331155	0.00113263
cg18844029	chr6	28885017	+	cg18844029		OpenSea	TRIM27	NM_006510	Body	IL10L10F	-0.414113	0.000331696	0.00113305
cg11731280	chr9	140066934	-	cg11731280	chr9:140068792-140069082	N_Shore	TMEM210	NM_001282477	TSS1500	IL6L10F	0.198349	0.000333284	0.00113704
cg14195992	chr8	48265917	-	cg14195992		OpenSea	KIAA0146	NM_001080394	Body	CRPL10F	-0.120411	0.00033987	0.00115804
cg20228731	chr7	130646051	+	cg20228731		OpenSea	FLJ43663;FLJ43663	NR_015431;NR_024153	Body;Body	IL1raL10F	-0.896193	0.000341776	0.00116307
cg12170419	chr20	23367377	+	cg12170419		OpenSea	NAPB;NAPB;NAPB;NAPB;NAPB	NR_104266;NM_001283026;NM_022080;NM_001283018;NM_001283020	Body;Body;Body;Body;Body	IL6L10F	-0.250736	0.000342625	0.00116449
cg14187619	chr2	239343111	+	cg14187619	chr2:239344401-239344627	N_Shore	ASB1	NM_001040445	Body	IL6L10F	-0.285441	0.000350547	0.00118992
cg20600850	chr12	6712515	-	cg20600850	chr12:6715500-6715829	N_Shelf	CHD4	NM_001273	Body	IL10L10F	0.229854	0.000356021	0.00120524
cg03356288	chr13	74639083	-	cg03356288		OpenSea	KLF12	NM_007249	5'UTR	CRPL10F	-0.061062	0.000356215	0.00120524
cg03356288	chr13	74639083	-	cg03356288		OpenSea	KLF12	NM_007249	5'UTR	IL6L10F	-0.11194	0.000356396	0.00120524
cg10597669	chr12	122294017	+	cg10597669		OpenSea	HPD;HPD	NM_001171993;NM_002150	Body;Body	IL10L10F	-0.168186	0.000362062	0.00122287
cg05422993	chr19	46526863	+	cg05422993	chr19:46526046-46526334	S_Shore	PGLYRP1	NM_005091	TSS1500	IL6L10F	-0.197942	0.000365162	0.0012318
cg15177686	chr4	185828927	-	cg15177686		OpenSea				TNFR2L10F	-0.347749	0.00036575	0.00123224
cg08917665	chr12	9861036	-	cg08917665		OpenSea				IL1raL10F	-0.236103	0.000366894	0.00123455
cg20320863	chr12	89575415	-	cg20320863		OpenSea				IL10L10F	-0.398646	0.000367635	0.00123551
cg17562163	chr15	58777264	-	cg17562163		OpenSea	LOC101928694;LIPC	NR_120338;NM_000236	Body;Body	IL10L10F	-0.216146	0.000371056	0.00124546
cg13827596	chr1	185298424	+	cg13827596		OpenSea	GS1-279B7.1	NR_038424	Body	CRPL10F	-0.0861393	0.000372277	0.001248
cg09555736	chr16	474271	+	cg09555736	chr16:474922-476815	N_Shore	RAB11FIP3	NM_014700	TSS1500	IL6L10F	0.217324	0.000372942	0.00124869
cg18789123	chr2	29174857	-	cg18789123		OpenSea				IL10L10F	-0.431172	0.000375162	0.00125301
cg05809362	chr17	38699371	+	cg05809362		OpenSea				TNFR2L10F	-0.230986	0.000374822	0.00125301
cg16971621	chr8	142167457	-	cg16971621		OpenSea	DENND3	NM_014957	Body	IL1raL10F	-0.201566	0.000378522	0.00125685
cg04903159	chr6	44202699	-	cg04903159	chr6:44205686-44205931	N_Shelf				IL6L10F	0.118042	0.000378636	0.00125685
cg22066978	chr5	55350682	+	cg22066978		OpenSea				TNFR2L10F	-0.351756	0.000377919	0.00125685
cg15413523	chr5	133451625	-	cg15413523	chr5:133449320-133451260	S_Shore	TCF7;TCF7;TCF7;TCF7;TCF7;TCF7;TCF7;TCF7;TCF7;TCF7	NM_213648;NM_001134852;NM_201632;NM_201633;NM_001134851;NM_201634;NM_001134851;NM_003202;NM_213648;NM_001134852	5'UTR;1stExon;5'UTR;5'UTR;1stExon;5'UTR;5'UTR;Body;1stExon;5'UTR	CRPL10F	0.0472271	0.0003769	0.00125685
cg17562163	chr15	58777264	-	cg17562163		OpenSea	LOC101928694;LIPC	NR_120338;NM_000236	Body;Body	TNFR2L10F	-0.265739	0.000377766	0.00125685
cg27206232	chr13	103264306	-	cg27206232		OpenSea	TPP2	NM_003291	Body	IL10L10F	0.305505	0.000380667	0.00126204
cg12249789	chr21	45203404	+	cg12249789	chr21:45206579-45207051	N_Shelf				IL10L10F	-0.282168	0.00038208	0.00126517
cg03047995	chr14	24601588	+	cg03047995	chr14:24601498-24601700	Island	FITM1	NM_203402	Body	CRPL10F	0.078454	0.000382593	0.00126532
cg16431791	chr19	14783092	+	cg16431791		OpenSea	ADGRE3;ADGRE3;ADGRE3	NM_032571;NM_001289159;NM_001289158	Body;Body;Body	IL1raL10F	0.285887	0.000383376	0.00126636
cg00301390	chr17	16749537	+	cg00301390		OpenSea				IL6L10F	0.120135	0.000386958	0.00127663
cg26256135	chr10	14608422	+	cg26256135		OpenSea	FAM107B;FAM107B;FAM107B;FAM107B;FAM107B;FAM107B;FAM107B;FAM107B;FAM107B;FAM107B	NM_001282701;NM_001282698;NM_001282702;NM_001282699;NM_001282703;NM_001282700;NM_001282697;NM_001282696;NM_031453;NM_001282695	5'UTR;5'UTR;5'UTR;5'UTR;5'UTR;5'UTR;5'UTR;5'UTR;Body;5'UTR	CRPL10F	-0.106516	0.000389677	0.00128403
cg09154528	chr22	50154745	+	cg09154528	chr22:50157939-50158217	N_Shelf				TNFR2L10F	-0.332372	0.000396914	0.00130629
cg04364800	chr3	160653423	+	cg04364800		OpenSea	PPM1L	NM_139245	Body	CRPL10F	-0.0706354	0.000400681	0.00131708
cg14187619	chr2	239343111	+	cg14187619	chr2:239344401-239344627	N_Shore	ASB1	NM_001040445	Body	CRPL10F	-0.158097	0.000402145	0.00132029
cg09977703	chr19	46854563	+	cg09977703	chr19:46850185-46850678	S_Shelf	PPP5C	NM_006247	Body	IL1raL10F	-0.407746	0.000407223	0.00133498
cg15528722	chr5	40756846	+	cg15528722	chr5:40755537-40756257	S_Shore	TTC33	NM_012382	TSS1500	TNFR2L10F	-0.485139	0.000407609	0.00133498
cg24274865	chr1	206946595	-	cg24274865		OpenSea	IL10	NM_000572	TSS1500	IL6L10F	-0.175823	0.000408337	0.00133575
cg12847371	chr19	13056058	-	cg12847371	chr19:13056458-13057125	N_Shore	RAD23A;RAD23A;RAD23A;RAD23A	NM_001270363;NM_001270362;NM_005053;NR_072976	TSS1500;TSS1500;TSS1500;TSS1500	IL10L10F	-0.348714	0.000412035	0.00134621
cg24418920	chr22	17709899	-	cg24418920		OpenSea				IL6L10F	-0.208421	0.000412908	0.00134744
cg09803092	chr15	91381597	+	cg09803092		OpenSea				IL1raL10F	-0.288564	0.000417393	0.00136043
cg16384774	chr14	89626932	-	cg16384774	chr14:89628885-89629199	N_Shore	FOXN3;FOXN3	NM_005197;NM_001085471	3'UTR;3'UTR	IL6L10F	-0.181321	0.000419117	0.0013644
cg12285003	chr20	61596335	+	cg12285003		OpenSea	SLC17A9;SLC17A9	NM_022082;NM_001302643	Body;Body	TNFAL10F	0.298804	0.000420542	0.00136739
cg20179730	chr13	22111377	-	cg20179730		OpenSea	MICU2	NM_152726	Body	CRPL10F	-0.130476	0.000421282	0.00136816
cg24023352	chr10	49540488	-	cg24023352		OpenSea	MAPK8	NM_001278547	5'UTR	TNFR2L10F	-0.797904	0.000426239	0.00138259
cg23013812	chr6	14841030	+	cg23013812		OpenSea				CRPL10F	-0.123265	0.000426821	0.00138282
cg08917665	chr12	9861036	-	cg08917665		OpenSea				TNFR2L10F	-0.361082	0.000430832	0.00139414
cg06705237	chr9	97402555	-	cg06705237	chr9:97401286-97402067	S_Shore	FBP1;FBP1	NM_001127628;NM_000507	TSS200;TSS1500	TNFR2L10F	-0.391487	0.000433998	0.00140271
cg02158894	chr19	17976717	-	cg02158894		OpenSea				IL6L10F	-0.149374	0.000434646	0.00140312
cg24796548	chr10	108785434	+	cg24796548		OpenSea	SORCS1;SORCS1;SORCS1;SORCS1;SORCS1;SORCS1	NM_001013031;NM_001206570;NM_052918;NM_001206572;NM_001206569;NM_001206571	Body;Body;Body;Body;Body;Body	TNFR2L10F	-0.383926	0.000436822	0.00140846
cg22895728	chr12	93531972	-	cg22895728		OpenSea	LOC643339	NR_040096	Body	IL1raL10F	-0.283187	0.000439594	0.00141571
cg08663999	chr3	150089701	-	cg08663999		OpenSea				IL6L10F	-0.204566	0.000451567	0.00145254
cg20991997	chr11	113844406	+	cg20991997		OpenSea	HTR3A;HTR3A;HTR3A	NM_213621;NM_000869;NR_046363	TSS1500;TSS1500;TSS1500	IL6L10F	0.195466	0.000457366	0.00146945
cg05708963	chr5	14583002	-	cg05708963	chr5:14581497-14582569	S_Shore	FAM105A	NM_019018	Body	CRPL10F	0.0794467	0.000458598	0.00147165
cg11731280	chr9	140066934	-	cg11731280	chr9:140068792-140069082	N_Shore	TMEM210	NM_001282477	TSS1500	CRPL10F	0.107028	0.000460584	0.00147627
cg09062752	chr9	71443046	-	cg09062752		OpenSea	PIP5K1B;PIP5K1B	NM_003558;NM_001278253	Body;Body	IL10L10F	-0.292113	0.00046403	0.00148555
cg04268643	chr17	76037239	+	cg04268643	chr17:76037074-76037323	Island	TNRC6C;TNRC6C	NM_018996;NM_001142640	5'UTR;5'UTR	CRPL10F	0.0649724	0.000465983	0.00149004
cg03337382	chr10	125960385	+	cg03337382		OpenSea				IL6L10F	-0.200843	0.000467522	0.00149319
cg07225450	chr21	39592213	+	cg07225450		OpenSea				IL1raL10F	-0.474967	0.000471853	0.00150525
cg18563886	chr10	135203102	-	cg18563886	chr10:135203101-135203316	Island	PAOX;PAOX;PAOX	NM_207128;NM_152911;NM_207127	Body;Body;3'UTR	IL10L10F	0.392448	0.000472442	0.00150535
cg26456810	chr17	42002103	+	cg26456810		OpenSea				CRPL10F	-0.0517615	0.000477604	0.00152001
cg16419027	chr13	76033339	-	cg16419027		OpenSea	TBC1D4;TBC1D4;TBC1D4	NM_014832;NM_001286658;NM_001286659	Body;Body;Body	CRPL10F	-0.0876783	0.000482999	0.00153537
cg18146146	chr19	47247380	+	cg18146146	chr19:47248749-47249948	N_Shore	STRN4;STRN4	NM_001039877;NM_013403	Body;Body	IL6L10F	-0.250097	0.000487439	0.00154766
cg16060189	chr10	94350577	+	cg16060189	chr10:94351356-94351615	N_Shore				IL10L10F	0.226843	0.00049335	0.00156459
cg14330293	chr17	1374051	+	cg14330293	chr17:1375216-1375460	N_Shore	MYO1C;MYO1C;MYO1C	NM_001080779;NM_033375;NM_001080950	Body;Body;Body	CRPL10F	0.0730251	0.00049811	0.00157784
cg20804821	chr3	51988454	+	cg20804821	chr3:51989763-51990639	N_Shore	GPR62	NM_080865	TSS1500	CRPL10F	0.0987955	0.000508581	0.00160912
cg00159243	chr12	109023799	-	cg00159243		OpenSea	SELPLG	NM_003006	5'UTR	IL1raL10F	-0.220047	0.000509374	0.00160926
cg19136485	chr14	106385381	-	cg19136485		OpenSea	KIAA0125	NR_026800	Body	IL10L10F	0.28205	0.000509818	0.00160926
cg24522373	chr9	92331809	-	cg24522373		OpenSea	UNQ6494	NR_024280	Body	TNFR2L10F	0.356806	0.000528778	0.00166601
cg18685080	chr16	81553347	+	cg18685080		OpenSea	CMIP;CMIP	NM_198390;NM_030629	Body;Body	CRPL10F	-0.0880817	0.00052903	0.00166601
cg26256135	chr10	14608422	+	cg26256135		OpenSea	FAM107B;FAM107B;FAM107B;FAM107B;FAM107B;FAM107B;FAM107B;FAM107B;FAM107B;FAM107B	NM_001282701;NM_001282698;NM_001282702;NM_001282699;NM_001282703;NM_001282700;NM_001282697;NM_001282696;NM_031453;NM_001282695	5'UTR;5'UTR;5'UTR;5'UTR;5'UTR;5'UTR;5'UTR;5'UTR;Body;5'UTR	IL10L10F	-0.306146	0.000531827	0.00167287
cg02156526	chr6	24934269	-	cg02156526		OpenSea	FAM65B;FAM65B	NM_001286445;NM_001286446	Body;Body	TNFR2L10F	-0.361598	0.000537722	0.00168945
cg16531578	chr6	42370098	-	cg16531578		OpenSea	TRERF1;TRERF1	NM_033502;NM_001297573	5'UTR;5'UTR	IL1raL10F	-0.61067	0.00054025	0.00169542
cg18765405	chr5	134644263	-	cg18765405		OpenSea				CRPL10F	-0.115592	0.000543586	0.00170391
cg06750745	chr4	184181896	-	cg06750745		OpenSea	WWC2	NM_024949	Body	IL10L10F	-0.285634	0.000552668	0.00173037
cg09154528	chr22	50154745	+	cg09154528	chr22:50157939-50158217	N_Shelf				IL6L10F	-0.169743	0.000556553	0.00174051
cg12249789	chr21	45203404	+	cg12249789	chr21:45206579-45207051	N_Shelf				IL1raL10F	-0.222805	0.000558111	0.00174337
cg11642336	chr7	30329949	+	cg11642336		OpenSea	MIR550B1;ZNRF2	NR_037513;NM_147128	TSS1500;Body	IL6L10F	-0.193414	0.000562748	0.00175583
cg17774776	chr5	6638536	+	cg17774776		OpenSea	SRD5A1	NM_001047	Body	IL1raL10F	-0.296621	0.0005674	0.0017683
cg10608465	chr19	13892443	+	cg10608465		OpenSea				TNFR2L10F	-0.241746	0.000568334	0.00176917
cg12839166	chr11	5462320	+	cg12839166		OpenSea	OR51I1;OR51B5;OR51B5	NM_001005288;NR_038321;NM_001005567	1stExon;Body;5'UTR	CRPL10F	0.0912884	0.000569496	0.00177075
cg19225696	chr1	201487263	+	cg19225696		OpenSea				TNFR2L10F	-0.399786	0.000571172	0.0017725
cg10545338	chr8	48556968	-	cg10545338		OpenSea	SPIDR;SPIDR;SPIDR;SPIDR	NR_104581;NM_001080394;NM_001282916;NM_001282919	Body;Body;Body;Body	IL10L10F	-0.262452	0.000571373	0.0017725
cg18403006	chr8	130695235	-	cg18403006		OpenSea				TNFR2L10F	-0.205482	0.000574418	0.00177991
cg08960443	chr9	140066947	-	cg08960443	chr9:140068792-140069082	N_Shore	TMEM210	NM_001282477	TSS1500	CRPL10F	0.10952	0.00057983	0.00179462
cg09902898	chr4	110001222	-	cg09902898		OpenSea	COL25A1;COL25A1;COL25A1;COL25A1	NR_045756;NM_198721;NM_001256074;NM_032518	Body;Body;Body;Body	IL10L10F	-0.380215	0.00058332	0.00180335
cg27057432	chr6	5619983	-	cg27057432		OpenSea	FARS2	NM_006567	Body	CRPL10F	-0.0711853	0.000584623	0.00180532
cg16648387	chr1	62729617	+	cg16648387		OpenSea	KANK4	NM_181712	Body	IL6L10F	-0.26371	0.000591344	0.00182141
cg08917665	chr12	9861036	-	cg08917665		OpenSea				IL6L10F	-0.167919	0.000591857	0.00182141
cg09154528	chr22	50154745	+	cg09154528	chr22:50157939-50158217	N_Shelf				IL10L10F	-0.269856	0.000590559	0.00182141
cg08381918	chr21	43221841	+	cg08381918	chr21:43221474-43221842	Island	PRDM15;PRDM15	NM_022115;NM_001040424	Body;Body	TNFR2L10F	0.235981	0.000593184	0.00182342
cg02392359	chr15	55572079	+	cg02392359		OpenSea	RAB27A	NM_183235	5'UTR	IL1raL10F	-0.395552	0.000594877	0.00182654
cg01900480	chr5	139068516	+	cg01900480		OpenSea				IL6L10F	0.129334	0.000597776	0.00183336
cg03047995	chr14	24601588	+	cg03047995	chr14:24601498-24601700	Island	FITM1	NM_203402	Body	IL1raL10F	0.180985	0.000602827	0.00184676
cg15932350	chr7	65818685	+	cg15932350		OpenSea	TPST1	NM_003596	Body	IL10L10F	-0.194361	0.00060566	0.00185333
cg00457165	chr6	31088366	+	cg00457165		OpenSea	CDSN;PSORS1C1	NM_001264;NM_014068	TSS200;5'UTR	CRPL10F	0.0785146	0.000613997	0.00187672
cg02940661	chr14	106382755	+	cg02940661		OpenSea	KIAA0125	NR_026800	TSS1500	TNFR2L10F	0.28835	0.000623802	0.00190453
cg03768345	chr14	103027280	+	cg03768345		OpenSea				IL6L10F	0.125531	0.00063014	0.00192171
cg01795822	chr1	10528093	-	cg01795822		OpenSea	DFFA;DFFA	NM_004401;NM_213566	Body;Body	IL6L10F	0.196568	0.000631317	0.00192313
cg04621850	chr9	140067121	+	cg04621850	chr9:140068792-140069082	N_Shore	TMEM210	NM_001282477	TSS1500	IL6L10F	0.178048	0.000637257	0.00193904
cg05859409	chr11	1799685	+	cg05859409		OpenSea				CRPL10F	-0.115185	0.000646309	0.00196437
cg11642336	chr7	30329949	+	cg11642336		OpenSea	MIR550B1;ZNRF2	NR_037513;NM_147128	TSS1500;Body	IL1raL10F	-0.250165	0.000648374	0.00196843
cg06433467	chr5	67730071	-	cg06433467		OpenSea				IL6L10F	-0.312018	0.000652066	0.00197742
cg14959425	chr7	20447707	+	cg14959425		OpenSea	ITGB8	NM_002214	Body	IL1raL10F	-0.225064	0.000653306	0.00197896
cg15818109	chr6	33142006	-	cg15818109		OpenSea	COL11A2;COL11A2;COL11A2	NM_080679;NM_080681;NM_080680	Body;Body;Body	IL10L10F	0.198557	0.000659365	0.00199508
cg04231870	chr11	65618874	-	cg04231870		OpenSea	SNX32;SNX32	NM_152760;NM_152760	ExonBnd;Body	TNFR2L10F	-0.353142	0.000672985	0.00203401
cg13538554	chr14	57050624	+	cg13538554	chr14:57046472-57046804	S_Shelf	TMEM260	NM_017799	Body	TNFR2L10F	-0.474268	0.000677307	0.00204479
cg16713588	chr17	62274272	+	cg16713588		OpenSea	TEX2;TEX2;TEX2	NM_001288733;NM_001288732;NM_018469	Body;Body;Body	IL6L10F	-0.16064	0.000694226	0.0020927
cg17823346	chr10	80848143	-	cg17823346		OpenSea	ZMIZ1	NM_020338	5'UTR	CRPL10F	0.064618	0.000694727	0.0020927
cg18403006	chr8	130695235	-	cg18403006		OpenSea				CRPL10F	-0.0583303	0.000697547	0.00209768
cg17953136	chr2	20232577	-	cg17953136		OpenSea	LAPTM4A	NM_014713	3'UTR	IL1raL10F	0.24257	0.000697931	0.00209768
cg18185662	chr11	42275722	+	cg18185662		OpenSea	LOC100507205	NR_038309	TSS1500	IL6L10F	-0.156562	0.000701667	0.00210656
cg19526722	chr1	89061160	-	cg19526722		OpenSea	PKN2-AS1	NR_110682	Body	IL10L10F	-0.361424	0.00070435	0.00211227
cg27142757	chr1	150573467	-	cg27142757		OpenSea				IL1raL10F	-0.303513	0.000718276	0.00215164
cg11226378	chr1	97990981	-	cg11226378		OpenSea	DPYD	NM_000110	Body	IL10L10F	-0.253351	0.000725525	0.00217095
cg05333174	chr22	43163057	+	cg05333174	chr22:43165947-43166287	N_Shelf				CRPL10F	0.139755	0.000728086	0.0021762
cg20263249	chr1	118176170	+	cg20263249		OpenSea				IL6L10F	-0.121437	0.000729404	0.00217774
cg05809362	chr17	38699371	+	cg05809362		OpenSea				IL10L10F	-0.173171	0.000741893	0.00221258
cg14959425	chr7	20447707	+	cg14959425		OpenSea	ITGB8	NM_002214	Body	TNFR2L10F	-0.328443	0.000744489	0.00221787
cg04797496	chr5	141339086	+	cg04797496		OpenSea	PCDH12	NM_016580	TSS1500	IL6L10F	-0.129091	0.00075647	0.00225108
cg26955383	chr10	105218660	-	cg26955383	chr10:105217966-105218287	S_Shore	CALHM1	NM_001001412	TSS200	IL1raL10F	0.236709	0.000770295	0.0022897
cg10243030	chr20	16156233	+	cg10243030		OpenSea				CRPL10F	0.147769	0.000772953	0.00229508
cg21457573	chr1	6822395	-	cg21457573		OpenSea				IL10L10F	-0.245365	0.000780401	0.00231465
cg17321267	chr19	5669909	+	cg17321267		OpenSea				IL1raL10F	0.289559	0.000783253	0.00232056
cg18403006	chr8	130695235	-	cg18403006		OpenSea				IL6L10F	-0.104507	0.000786603	0.00232284
cg14954838	chr12	122293996	+	cg14954838		OpenSea	HPD;HPD	NM_001171993;NM_002150	Body;Body	CRPL10F	-0.142289	0.000785931	0.00232284
cg24796548	chr10	108785434	+	cg24796548		OpenSea	SORCS1;SORCS1;SORCS1;SORCS1;SORCS1;SORCS1	NM_001013031;NM_001206570;NM_052918;NM_001206572;NM_001206569;NM_001206571	Body;Body;Body;Body;Body;Body	IL6L10F	-0.178763	0.00078601	0.00232284
cg18789123	chr2	29174857	-	cg18789123		OpenSea				IL6L10F	-0.250188	0.000788912	0.00232712
cg19526722	chr1	89061160	-	cg19526722		OpenSea	PKN2-AS1	NR_110682	Body	TNFR2L10F	-0.41878	0.000791302	0.00233162
cg19082218	chr2	8815947	-	cg19082218	chr2:8816314-8817264	N_Shore	ID2-AS1	NR_110154	Body	TNFR2L10F	-0.374151	0.000793628	0.00233593
cg13257654	chr8	42946331	+	cg13257654	chr8:42948532-42948928	N_Shelf				IL1BL10F	0.207697	0.000801353	0.0023561
cg17155829	chr19	7413575	-	cg17155829		OpenSea				CRPL10F	-0.100374	0.000803618	0.00235836
cg16384774	chr14	89626932	-	cg16384774	chr14:89628885-89629199	N_Shore	FOXN3;FOXN3	NM_005197;NM_001085471	3'UTR;3'UTR	CRPL10F	-0.0941276	0.000803867	0.00235836
cg05708963	chr5	14583002	-	cg05708963	chr5:14581497-14582569	S_Shore	FAM105A	NM_019018	Body	IL10L10F	0.218896	0.000806597	0.00235868
cg09902898	chr4	110001222	-	cg09902898		OpenSea	COL25A1;COL25A1;COL25A1;COL25A1	NR_045756;NM_198721;NM_001256074;NM_032518	Body;Body;Body;Body	TNFR2L10F	-0.490978	0.000805118	0.00235868
cg17953136	chr2	20232577	-	cg17953136		OpenSea	LAPTM4A	NM_014713	3'UTR	IL1BL10F	0.33164	0.000806319	0.00235868
cg04512965	chr19	6038846	-	cg04512965	chr19:6039990-6040228	N_Shore	RFX2;RFX2	NM_000635;NM_134433	Body;Body	TNFR2L10F	-0.249625	0.000808496	0.00235913
cg06097048	chr10	28848388	+	cg06097048		OpenSea	WAC;WAC;WAC	NM_016628;NM_100486;NM_100264	Body;Body;Body	IL10L10F	0.170661	0.000808347	0.00235913
cg23305420	chr11	109948734	-	cg23305420		OpenSea				IL6L10F	-0.259608	0.000812669	0.00236875
cg08381918	chr21	43221841	+	cg08381918	chr21:43221474-43221842	Island	PRDM15;PRDM15	NM_022115;NM_001040424	Body;Body	IL1raL10F	0.148453	0.000822425	0.0023946
cg09062752	chr9	71443046	-	cg09062752		OpenSea	PIP5K1B;PIP5K1B	NM_003558;NM_001278253	Body;Body	IL6L10F	-0.172197	0.00082673	0.00240455
cg01271695	chr2	1719323	-	cg01271695		OpenSea	PXDN	NM_012293	Body	TNFR2L10F	0.301314	0.000828636	0.00240581
cg25501329	chr16	59934140	-	cg25501329		OpenSea	LOC101927580	NR_110917	Body	TNFAL10F	0.455798	0.000828946	0.00240581
cg10243030	chr20	16156233	+	cg10243030		OpenSea				IL10L10F	0.422262	0.000843362	0.00244503
cg11604811	chr4	26206130	-	cg11604811		OpenSea				IL6L10F	-0.243629	0.0008513	0.00246276
cg11226378	chr1	97990981	-	cg11226378		OpenSea	DPYD	NM_000110	Body	IL6L10F	-0.157919	0.000850907	0.00246276
cg09803092	chr15	91381597	+	cg09803092		OpenSea				IL6L10F	-0.20938	0.0008651	0.0025
cg13178755	chr2	174023580	-	cg13178755		OpenSea	ZAK;ZAK	NM_133646;NM_016653	Body;Body	IL1raL10F	-0.425035	0.000873129	0.00252051
cg24272019	chr14	106376379	-	cg24272019		OpenSea				CRPL10F	0.101053	0.000875084	0.00252077
cg25746149	chr11	117280371	+	cg25746149		OpenSea	CEP164;CEP164	NM_001271933;NM_014956	Body;Body	IL6L10F	-0.261877	0.000874697	0.00252077
cg14330293	chr17	1374051	+	cg14330293	chr17:1375216-1375460	N_Shore	MYO1C;MYO1C;MYO1C	NM_001080779;NM_033375;NM_001080950	Body;Body;Body	IL6L10F	0.12629	0.00087844	0.00252774
cg19822755	chr16	30108259	-	cg19822755	chr16:30107511-30107875	S_Shore	YPEL3;YPEL3	NM_031477;NM_001145524	TSS1500;TSS1500	IL1raL10F	0.300228	0.000885943	0.00254661
cg24854225	chr1	185374534	+	cg24854225		OpenSea				IL10L10F	-0.374399	0.000893823	0.00256381
cg15341132	chr15	91499023	-	cg15341132	chr15:91497994-91498615	S_Shore	RCCD1;RCCD1;RCCD1	NM_033544;NM_001017919;NM_033544	5'UTR;5'UTR;ExonBnd	IL1raL10F	-0.172655	0.00089315	0.00256381
cg00533827	chr2	86163827	+	cg00533827		OpenSea				IL1raL10F	-0.15094	0.000896556	0.00256892
cg27119904	chr13	114814333	-	cg27119904	chr13:114813942-114814457	Island	RASA3	NM_007368	Body	IL10L10F	0.178379	0.000904703	0.00258952
cg15341132	chr15	91499023	-	cg15341132	chr15:91497994-91498615	S_Shore	RCCD1;RCCD1;RCCD1	NM_033544;NM_001017919;NM_033544	5'UTR;5'UTR;ExonBnd	IL6L10F	-0.128624	0.000911171	0.00260528
cg10834218	chr20	8053963	-	cg10834218		OpenSea				IL1raL10F	-0.344446	0.000948419	0.00270891
cg13314505	chr11	133835493	+	cg13314505		OpenSea				IL10L10F	-0.243128	0.000950812	0.00271001
cg17562163	chr15	58777264	-	cg17562163		OpenSea	LOC101928694;LIPC	NR_120338;NM_000236	Body;Body	IL6L10F	-0.12497	0.000950005	0.00271001
cg13538554	chr14	57050624	+	cg13538554	chr14:57046472-57046804	S_Shelf	TMEM260	NM_017799	Body	IL6L10F	-0.207063	0.000952877	0.00271304
cg03307560	chr16	28161100	-	cg03307560		OpenSea	XPO6;XPO6	NM_001270940;NM_015171	Body;Body	TNFR2L10F	-0.450552	0.000958941	0.00272456
cg04268643	chr17	76037239	+	cg04268643	chr17:76037074-76037323	Island	TNRC6C;TNRC6C	NM_018996;NM_001142640	5'UTR;5'UTR	IL1raL10F	0.145876	0.000957947	0.00272456
cg22066978	chr5	55350682	+	cg22066978		OpenSea				IL6L10F	-0.178159	0.00100088	0.00284074
cg06963709	chr7	155150793	+	cg06963709		OpenSea				CRPL10F	-0.137404	0.00100244	0.00284095
cg21186405	chr2	103335661	+	cg21186405		OpenSea	MFSD9	NM_032718	Body	IL1raL10F	-0.310577	0.00100306	0.00284095
cg09555736	chr16	474271	+	cg09555736	chr16:474922-476815	N_Shore	RAB11FIP3	NM_014700	TSS1500	IL10L10F	0.322582	0.00100864	0.00285376
cg16971621	chr8	142167457	-	cg16971621		OpenSea	DENND3	NM_014957	Body	TNFR2L10F	-0.275858	0.00101706	0.00287458
cg02287483	chr8	105848201	-	cg02287483		OpenSea				CRPL10F	-0.0796253	0.0010204	0.00288101
cg18363226	chr7	132741882	+	cg18363226		OpenSea	CHCHD3	NM_017812	Body	IL1raL10F	-0.255337	0.0010289	0.00289894
cg13304206	chr4	40562130	+	cg13304206		OpenSea	RBM47	NM_001098634	5'UTR	CRPL10F	-0.120111	0.00102997	0.00289894
cg12839166	chr11	5462320	+	cg12839166		OpenSea	OR51I1;OR51B5;OR51B5	NM_001005288;NR_038321;NM_001005567	1stExon;Body;5'UTR	IL1raL10F	0.213127	0.00102987	0.00289894
cg12285003	chr20	61596335	+	cg12285003		OpenSea	SLC17A9;SLC17A9	NM_022082;NM_001302643	Body;Body	IL1BL10F	0.258848	0.00105676	0.00296816
cg25371251	chr11	68483493	+	cg25371251		OpenSea	5	NM_004923	Body	CRPL10F	-0.101508	0.00105651	0.00296816
cg25501329	chr16	59934140	-	cg25501329		OpenSea	LOC101927580	NR_110917	Body	IL10L10F	0.363285	0.0010636	0.00298426
cg19163210	chr15	69599744	+	cg19163210		OpenSea	PAQR5	NM_017705	5'UTR	CRPL10F	0.0405556	0.00110666	0.00310186
cg17230773	chr7	142494148	+	cg17230773	chr7:142494563-142495248	N_Shore				TNFR2L10F	0.265711	0.00111634	0.00312576
cg24854225	chr1	185374534	+	cg24854225		OpenSea				IL1raL10F	-0.30682	0.00114443	0.0032011
cg19822755	chr16	30108259	-	cg19822755	chr16:30107511-30107875	S_Shore	YPEL3;YPEL3	NM_031477;NM_001145524	TSS1500;TSS1500	IL10L10F	0.366917	0.00115332	0.00322262
cg06527396	chr3	128959178	+	cg06527396		OpenSea				TNFR2L10F	-0.367364	0.00116098	0.0032369
cg04323816	chr22	40784430	+	cg04323816		OpenSea	SGSM3;SGSM3	NM_015705;NM_001301849	5'UTR;5'UTR	IL10L10F	0.144423	0.00116017	0.0032369
cg03356288	chr13	74639083	-	cg03356288		OpenSea	KLF12	NM_007249	5'UTR	TNFR2L10F	-0.190984	0.00116203	0.0032369
cg18685080	chr16	81553347	+	cg18685080		OpenSea	CMIP;CMIP	NM_198390;NM_030629	Body;Body	IL6L10F	-0.151359	0.00116935	0.00325395
cg08663999	chr3	150089701	-	cg08663999		OpenSea				IL10L10F	-0.300403	0.00117183	0.00325748
cg04797496	chr5	141339086	+	cg04797496		OpenSea	PCDH12	NM_016580	TSS1500	IL1raL10F	-0.159843	0.0011736	0.00325906
cg19163210	chr15	69599744	+	cg19163210		OpenSea	PAQR5	NM_017705	5'UTR	TNFR2L10F	0.14396	0.00118607	0.00329031
cg24016995	chr10	129868149	+	cg24016995		OpenSea	PTPRE;PTPRE	NM_130435;NM_006504	Body;Body	TNFR2L10F	-0.297779	0.00119637	0.00331547
cg26543033	chr7	150056200	-	cg26543033		OpenSea				IL10L10F	-0.193866	0.00120389	0.00333289
cg27339271	chr10	90553647	-	cg27339271		OpenSea				TNFR2L10F	-0.446798	0.00121104	0.00334925
cg13538554	chr14	57050624	+	cg13538554	chr14:57046472-57046804	S_Shelf	TMEM260	NM_017799	Body	IL10L10F	-0.327478	0.00121846	0.00336632
cg12242258	chr21	35884230	-	cg12242258		OpenSea	KCNE1;KCNE1;KCNE1;KCNE1	NM_001270403;NM_001270404;NM_001270402;NM_000219	TSS1500;TSS1500;TSS1500;5'UTR	IL6L10F	-0.142649	0.00122345	0.00337667
cg05092891	chr21	37535885	-	cg05092891		OpenSea	DOPEY2	NM_005128	TSS1500	TNFR2L10F	-0.361597	0.00122501	0.00337752
cg15341132	chr15	91499023	-	cg15341132	chr15:91497994-91498615	S_Shore	RCCD1;RCCD1;RCCD1	NM_033544;NM_001017919;NM_033544	5'UTR;5'UTR;ExonBnd	CRPL10F	-0.0697659	0.00125255	0.00344994
cg17155829	chr19	7413575	-	cg17155829		OpenSea				IL6L10F	-0.174972	0.00125589	0.0034556
cg15341132	chr15	91499023	-	cg15341132	chr15:91497994-91498615	S_Shore	RCCD1;RCCD1;RCCD1	NM_033544;NM_001017919;NM_033544	5'UTR;5'UTR;ExonBnd	TNFAL10F	-0.245712	0.00125875	0.00345996
cg22895728	chr12	93531972	-	cg22895728		OpenSea	LOC643339	NR_040096	Body	IL10L10F	-0.318862	0.00129219	0.00354466
cg06166051	chr2	179696896	+	cg06166051		OpenSea	CCDC141	NM_173648	3'UTR	IL6L10F	-0.150687	0.00129119	0.00354466
cg25198113	chr1	5743886	-	cg25198113		OpenSea				IL1raL10F	0.121255	0.0012995	0.00356111
cg08381918	chr21	43221841	+	cg08381918	chr21:43221474-43221842	Island	PRDM15;PRDM15	NM_022115;NM_001040424	Body;Body	CRPL10F	0.0589389	0.00130745	0.00357925
cg27339271	chr10	90553647	-	cg27339271		OpenSea				IL6L10F	-0.2345	0.0013126	0.00358973
cg08506528	chr10	4093714	-	cg08506528		OpenSea	LOC101927964	NR_120632	TSS1500	IL6L10F	-0.169889	0.00132082	0.00360856
cg19225696	chr1	201487263	+	cg19225696		OpenSea				IL1raL10F	-0.250107	0.00134011	0.00365754
cg11226378	chr1	97990981	-	cg11226378		OpenSea	DPYD	NM_000110	Body	IL1raL10F	-0.197483	0.00134288	0.00366143
cg04874562	chr11	5462540	+	cg04874562		OpenSea	OR51I1	NM_001005288	1stExon	IL1raL10F	0.160648	0.00136497	0.00371789
cg13659875	chr8	9045074	+	cg13659875		OpenSea	LOC101929128	NR_125431	TSS1500	IL6L10F	-0.0884451	0.00136829	0.00372317
cg17930583	chr6	29591082	+	cg17930583		OpenSea	GABBR1;GABBR1;GABBR1	NM_021904;NM_021903;NM_001470	Body;Body;Body	IL10L10F	-0.168248	0.00138373	0.00376142
cg19805943	chr2	85933069	+	cg19805943		OpenSea				IL10L10F	-0.273127	0.00139047	0.00377592
cg22409916	chr7	138426100	+	cg22409916		OpenSea	ATP6V0A4;ATP6V0A4;ATP6V0A4	NM_130841;NM_130840;NM_020632	Body;Body;Body	TNFR2L10F	-0.429128	0.00141215	0.00383096
cg24672565	chr3	14382884	+	cg24672565		OpenSea				CRPL10F	0.0704943	0.00141551	0.00383621
cg26859083	chr3	55002054	-	cg26859083		OpenSea	LRTM1;CACNA2D3	NM_001304389;NM_018398	TSS1500;Body	IL1raL10F	0.237955	0.00142258	0.00385151
cg25269438	chr2	26220838	+	cg25269438		OpenSea				TNFR2L10F	-0.340257	0.00142819	0.00386282
cg08714061	chr9	126908822	-	cg08714061		OpenSea				TNFR2L10F	-0.440191	0.00144164	0.00389143
cg02300329	chr14	55574999	-	cg02300329		OpenSea				IL6L10F	-0.145013	0.00144128	0.00389143
cg13827209	chr9	101912842	+	cg13827209		OpenSea	TGFBR1;TGFBR1	NM_001130916;NM_004612	3'UTR;3'UTR	CRPL10F	0.151198	0.00144418	0.0038944
cg11807188	chr1	65924844	+	cg11807188		OpenSea	LEPR;LEPR;LEPR	NM_001003680;NM_001003679;NM_002303	5'UTR;5'UTR;5'UTR	TNFR2L10F	-0.171717	0.00146421	0.00394445
cg22066978	chr5	55350682	+	cg22066978		OpenSea				IL10L10F	-0.272626	0.00147393	0.00396668
cg25501329	chr16	59934140	-	cg25501329		OpenSea	LOC101927580	NR_110917	Body	CRPL10F	0.12391	0.00149017	0.0040064
cg21069139	chr1	115091976	+	cg21069139		OpenSea				IL10L10F	-0.255569	0.00149398	0.00401265
cg14214717	chr20	5466839	-	cg14214717		OpenSea				IL10L10F	0.143049	0.00150424	0.00403621
cg13257654	chr8	42946331	+	cg13257654	chr8:42948532-42948928	N_Shelf				CRPL10F	0.0598503	0.0015087	0.00404415
cg10636246	chr1	159046973	+	cg10636246		OpenSea	AIM2	NM_004833	TSS1500	IL10L10F	-0.528855	0.00151718	0.00406133
cg02156526	chr6	24934269	-	cg02156526		OpenSea	FAM65B;FAM65B	NM_001286445;NM_001286446	Body;Body	IL6L10F	-0.181705	0.00151812	0.00406133
cg05333174	chr22	43163057	+	cg05333174	chr22:43165947-43166287	N_Shelf				IL1BL10F	0.430347	0.00153044	0.00409026
cg13978081	chr6	116952796	+	cg13978081		OpenSea	RSPH4A;RSPH4A	NM_001161664;NM_001010892	Body;Body	CRPL10F	0.0587179	0.00156043	0.00416628
cg12016267	chr22	42147356	+	cg12016267		OpenSea	MEI1	NM_152513	Body	CRPL10F	-0.0631429	0.00156645	0.00417706
cg19136485	chr14	106385381	-	cg19136485		OpenSea	KIAA0125	NR_026800	Body	IL6L10F	0.156924	0.00156756	0.00417706
cg04797496	chr5	141339086	+	cg04797496		OpenSea	PCDH12	NM_016580	TSS1500	CRPL10F	-0.0663127	0.00158004	0.00420618
cg02158894	chr19	17976717	-	cg02158894		OpenSea				IL10L10F	-0.215462	0.00159031	0.00422936
cg24331727	chr11	16213327	-	cg24331727		OpenSea	SOX6;SOX6;SOX6;SOX6	NM_001145811;NM_033326;NM_017508;NM_001145819	Body;Body;Body;Body	IL1BL10F	0.197556	0.0016037	0.00426075
cg24296397	chr3	49692537	+	cg24296397	chr3:49690022-49690329	S_Shelf	BSN	NM_003458	Body	IL1raL10F	0.151952	0.00162321	0.00430835
cg03504306	chr19	17326697	+	cg03504306	chr19:17326114-17326551	S_Shore	USE1	NM_018467	Body	IL10L10F	0.137365	0.00162981	0.00432163
cg18850465	chr16	50718807	-	cg18850465		OpenSea				IL1raL10F	-0.112802	0.00163151	0.0043219
cg11979298	chr3	101707603	+	cg11979298		OpenSea	LOC152225	NR_026934	Body	IL1raL10F	-0.158843	0.0016557	0.00438169
cg03464923	chr8	96115124	+	cg03464923		OpenSea				IL10L10F	-0.25896	0.00166359	0.00439487
cg05092891	chr21	37535885	-	cg05092891		OpenSea	DOPEY2	NM_005128	TSS1500	IL6L10F	-0.181325	0.00166394	0.00439487
cg25082943	chr12	93367516	+	cg25082943		OpenSea				IL10L10F	-0.292874	0.00167474	0.00440828
cg25082943	chr12	93367516	+	cg25082943		OpenSea				TNFR2L10F	-0.36506	0.00167245	0.00440828
cg09902898	chr4	110001222	-	cg09902898		OpenSea	COL25A1;COL25A1;COL25A1;COL25A1	NR_045756;NM_198721;NM_001256074;NM_032518	Body;Body;Body;Body	CRPL10F	-0.120517	0.00167554	0.00440828
cg20127419	chr1	112289991	-	cg20127419		OpenSea	FAM212B-AS1;FAM212B-AS1;FAM212B;LOC101928718	NR_038952;NR_038951;NM_198926;NR_125963	Body;Body;Body;Body	TNFR2L10F	-0.316038	0.00167535	0.00440828
cg26312071	chr15	90727783	+	cg26312071	chr15:90727879-90728570	N_Shore	SEMA4B	NM_020210	TSS1500	IL1raL10F	-0.210764	0.00168692	0.00442959
cg01837788	chr11	57315686	+	cg01837788		OpenSea	SMTNL1	NM_001105565	Body	IL6L10F	0.0906236	0.00168548	0.00442959
cg15150970	chr2	25473529	-	cg15150970	chr2:25474757-25475598	N_Shore	DNMT3A;DNMT3A;DNMT3A	NM_022552;NM_175629;NM_153759	Body;Body;Body	TNFR2L10F	0.165001	0.00169935	0.0044579
cg09902898	chr4	110001222	-	cg09902898		OpenSea	COL25A1;COL25A1;COL25A1;COL25A1	NR_045756;NM_198721;NM_001256074;NM_032518	Body;Body;Body;Body	IL6L10F	-0.213886	0.00172024	0.00450832
cg03304763	chr11	112037427	+	cg03304763		OpenSea	TEX12	NM_031275	TSS1500	IL6L10F	-0.208349	0.00174095	0.0045582
cg23468312	chr8	130426887	-	cg23468312		OpenSea	CCDC26;CCDC26;CCDC26;CCDC26	NR_130918;NR_130919;NR_130920;NR_130917	Body;Body;Body;Body	TNFR2L10F	-0.411315	0.00174513	0.0045647
cg01680062	chr21	36185960	-	cg01680062		OpenSea	RUNX1;RUNX1	NM_001001890;NM_001754	Body;Body	IL1BL10F	-0.280438	0.00177212	0.00463083
cg24272019	chr14	106376379	-	cg24272019		OpenSea				IL1BL10F	0.314279	0.00178226	0.00464385
cg21506763	chr3	38060329	-	cg21506763		OpenSea	PLCD1;PLCD1;PLCD1	NR_024071;NM_001130964;NM_006225	Body;Body;Body	IL1BL10F	0.22646	0.00178059	0.00464385
cg26365581	chr1	172243209	-	cg26365581		OpenSea	DNM3;DNM3	NM_001136127;NM_015569	Body;Body	IL1raL10F	-0.283896	0.00178107	0.00464385
cg07138962	chr14	100035588	+	cg07138962		OpenSea	CCDC85C	NM_001144995	Body	CRPL10F	0.0720221	0.00178615	0.00464893
cg09803092	chr15	91381597	+	cg09803092		OpenSea				TNFR2L10F	-0.388105	0.00178765	0.00464893
cg26468118	chr13	111175670	-	cg26468118		OpenSea	RAB20	NM_017817	3'UTR	CRPL10F	-0.106456	0.00183126	0.00475775
cg06380030	chr14	65459268	-	cg06380030		OpenSea	FNTB;CHURC1-FNTB;CHURC1-FNTB	NM_002028;NM_001202559;NM_001202558	Body;Body;Body	CRPL10F	-0.104397	0.00186247	0.0048342
cg02228492	chr17	14224797	-	cg02228492		OpenSea	HS3ST3B1	NM_006041	Body	CRPL10F	-0.0955449	0.00187656	0.0048661
cg15033511	chr17	54994023	+	cg15033511	chr17:54990832-54991771	S_Shelf				TNFR2L10F	-0.206667	0.0018924	0.00490246
cg17823346	chr10	80848143	-	cg17823346		OpenSea	ZMIZ1	NM_020338	5'UTR	TNFR2L10F	0.220234	0.00190396	0.00492768
cg20263249	chr1	118176170	+	cg20263249		OpenSea				IL1BL10F	-0.197723	0.00193336	0.00499898
cg14959425	chr7	20447707	+	cg14959425		OpenSea	ITGB8	NM_002214	Body	IL10L10F	-0.256298	0.00194606	0.00502702
cg03304763	chr11	112037427	+	cg03304763		OpenSea	TEX12	NM_031275	TSS1500	TNFR2L10F	-0.428472	0.00198215	0.00511534
cg08381918	chr21	43221841	+	cg08381918	chr21:43221474-43221842	Island	PRDM15;PRDM15	NM_022115;NM_001040424	Body;Body	IL10L10F	0.165811	0.00200106	0.00515923
cg04136748	chr5	133515262	-	cg04136748	chr5:133511971-133512902	S_Shelf				TNFR2L10F	-0.145467	0.00203153	0.00523278
cg03047995	chr14	24601588	+	cg03047995	chr14:24601498-24601700	Island	FITM1	NM_203402	Body	IL10L10F	0.198341	0.00203662	0.00524091
cg15034393	chr3	152856773	-	cg15034393		OpenSea				IL10L10F	-0.380399	0.00204118	0.00524403
cg13827209	chr9	101912842	+	cg13827209		OpenSea	TGFBR1;TGFBR1	NM_001130916;NM_004612	3'UTR;3'UTR	IL1BL10F	0.476863	0.00204172	0.00524403
cg05708963	chr5	14583002	-	cg05708963	chr5:14581497-14582569	S_Shore	FAM105A	NM_019018	Body	IL1raL10F	0.167118	0.00205119	0.00526337
cg19082218	chr2	8815947	-	cg19082218	chr2:8816314-8817264	N_Shore	ID2-AS1	NR_110154	Body	IL10L10F	-0.293933	0.00206066	0.00528263
cg26089920	chr18	22494802	+	cg26089920		OpenSea				TNFR2L10F	-0.153956	0.00207173	0.00530597
cg14214717	chr20	5466839	-	cg14214717		OpenSea				IL1BL10F	0.155551	0.00208059	0.00532364
cg12242258	chr21	35884230	-	cg12242258		OpenSea	KCNE1;KCNE1;KCNE1;KCNE1	NM_001270403;NM_001270404;NM_001270402;NM_000219	TSS1500;TSS1500;TSS1500;5'UTR	CRPL10F	-0.0745741	0.00210135	0.00537167
cg26615736	chr1	45267159	+	cg26615736	chr1:45265534-45266783	S_Shore	PLK3	NM_004073	Body	TNFR2L10F	-0.236847	0.00212982	0.0054393
cg13978081	chr6	116952796	+	cg13978081		OpenSea	RSPH4A;RSPH4A	NM_001161664;NM_001010892	Body;Body	IL1raL10F	0.139064	0.0021335	0.00544355
cg04070976	chr17	73577422	+	cg04070976		OpenSea				IL1BL10F	0.24206	0.00214353	0.00546397
cg11604811	chr4	26206130	-	cg11604811		OpenSea				IL10L10F	-0.362292	0.00215972	0.00550006
cg03224013	chr14	106382726	-	cg03224013		OpenSea	KIAA0125	NR_026800	TSS1500	TNFR2L10F	0.326059	0.00216849	0.0055172
cg00568296	chr20	48675540	+	cg00568296		OpenSea				IL1raL10F	0.154472	0.00217599	0.00553107
cg01795822	chr1	10528093	-	cg01795822		OpenSea	DFFA;DFFA	NM_004401;NM_213566	Body;Body	IL1raL10F	0.231196	0.00220599	0.00559679
cg11604811	chr4	26206130	-	cg11604811		OpenSea				TNFR2L10F	-0.466844	0.00220535	0.00559679
cg09977703	chr19	46854563	+	cg09977703	chr19:46850185-46850678	S_Shelf	PPP5C	NM_006247	Body	IL6L10F	-0.259183	0.00222338	0.00563035
cg12249789	chr21	45203404	+	cg12249789	chr21:45206579-45207051	N_Shelf				CRPL10F	-0.0834374	0.00222302	0.00563035
cg07388661	chr6	158663595	-	cg07388661		OpenSea				TNFR2L10F	-0.313778	0.0022463	0.00568305
cg20804821	chr3	51988454	+	cg20804821	chr3:51989763-51990639	N_Shore	GPR62	NM_080865	TSS1500	IL6L10F	0.155159	0.00225884	0.00570944
cg02293874	chr3	124408740	+	cg02293874		OpenSea	KALRN;KALRN	NM_001024660;NM_007064	Body;Body	CRPL10F	-0.0747727	0.00226959	0.00573123
cg03337382	chr10	125960385	+	cg03337382		OpenSea				TNFR2L10F	-0.345965	0.00227811	0.0057474
cg06750745	chr4	184181896	-	cg06750745		OpenSea	WWC2	NM_024949	Body	IL1raL10F	-0.203198	0.00228134	0.00575017
cg12644285	chr15	93570953	+	cg12644285		OpenSea	CHD2	NM_001271	3'UTR	IL10L10F	-0.248426	0.00228616	0.00575695
cg09555736	chr16	474271	+	cg09555736	chr16:474922-476815	N_Shore	RAB11FIP3	NM_014700	TSS1500	CRPL10F	0.105237	0.00231029	0.0058123
cg24521685	chr4	185748534	-	cg24521685	chr4:185746557-185747827	S_Shore	ACSL1;ACSL1	NM_001286711;NM_001995	TSS1500;TSS1500	TNFR2L10F	-0.231597	0.00234392	0.00589142
cg06433467	chr5	67730071	-	cg06433467		OpenSea				IL1raL10F	-0.370245	0.00235247	0.00590742
cg00968118	chr22	43686187	-	cg00968118		OpenSea	SCUBE1	NM_173050	Body	CRPL10F	0.0714423	0.00238793	0.00599089
cg24016995	chr10	129868149	+	cg24016995		OpenSea	PTPRE;PTPRE	NM_130435;NM_006504	Body;Body	IL6L10F	-0.146202	0.00239376	0.00599996
cg27218041	chr1	59953216	-	cg27218041		OpenSea	FGGY;FGGY;FGGY;FGGY	NM_018291;NM_001244714;NM_001113411;NR_103473	Body;Body;Body;Body	IL1raL10F	0.156726	0.00243881	0.00610721
cg08960443	chr9	140066947	-	cg08960443	chr9:140068792-140069082	N_Shore	TMEM210	NM_001282477	TSS1500	IL1raL10F	0.227275	0.00248851	0.00622589
cg05696969	chr5	145326228	-	cg05696969		OpenSea	SH3RF2	NM_152550	Body	IL1raL10F	-0.293279	0.00256325	0.00640693
cg01436651	chr18	52029246	-	cg01436651		OpenSea				TNFR2L10F	-0.256786	0.0025897	0.00646706
cg20733017	chr7	157618302	-	cg20733017	chr7:157618856-157619302	N_Shore	PTPRN2;PTPRN2;PTPRN2;PTPRN2;PTPRN2	NM_001308268;NM_002847;NM_130843;NM_130842;NM_001308267	Body;Body;Body;Body;Body	CRPL10F	0.0551359	0.00259549	0.00647554
cg18563886	chr10	135203102	-	cg18563886	chr10:135203101-135203316	Island	PAOX;PAOX;PAOX	NM_207128;NM_152911;NM_207127	Body;Body;3'UTR	CRPL10F	0.116321	0.00263359	0.00656454
cg18607308	chr16	66969500	-	cg18607308	chr16:66969499-66969878	Island	FAM96B;CES2;FAM96B;CES2	NR_024525;NM_003869;NM_016062;NM_198061	TSS1500;1stExon;TSS1500;1stExon	IL6L10F	0.0620024	0.00263896	0.00657081
cg15549550	chr2	11857010	-	cg15549550		OpenSea	LPIN1	NM_001261428	Body	IL10L10F	-0.230804	0.00264097	0.00657081
cg04621850	chr9	140067121	+	cg04621850	chr9:140068792-140069082	N_Shore	TMEM210	NM_001282477	TSS1500	CRPL10F	0.0873877	0.00266427	0.00662268
cg15177686	chr4	185828927	-	cg15177686		OpenSea				CRPL10F	-0.0810111	0.00268354	0.00666445
cg00218114	chr1	65157404	+	cg00218114		OpenSea	CACHD1;CACHD1	NM_001293274;NM_020925	3'UTR;3'UTR	IL6L10F	-0.181188	0.00269299	0.00668178
cg12117418	chr1	29157255	+	cg12117418		OpenSea	OPRD1	NM_000911	Body	IL6L10F	-0.10413	0.0027498	0.00681647
cg06380030	chr14	65459268	-	cg06380030		OpenSea	FNTB;CHURC1-FNTB;CHURC1-FNTB	NM_002028;NM_001202559;NM_001202558	Body;Body;Body	IL1raL10F	-0.23766	0.00278133	0.00688831
cg02940661	chr14	106382755	+	cg02940661		OpenSea	KIAA0125	NR_026800	TSS1500	IL10L10F	0.18547	0.00278411	0.00688888
cg04070976	chr17	73577422	+	cg04070976		OpenSea				IL1raL10F	0.172462	0.00282608	0.00698634
cg01680062	chr21	36185960	-	cg01680062		OpenSea	RUNX1;RUNX1	NM_001001890;NM_001754	Body;Body	IL1raL10F	-0.192114	0.00282915	0.00698754
cg21069139	chr1	115091976	+	cg21069139		OpenSea				IL1raL10F	-0.191989	0.00290958	0.00717962
cg27142757	chr1	150573467	-	cg27142757		OpenSea				TNFR2L10F	-0.387172	0.0029207	0.00720048
cg05696969	chr5	145326228	-	cg05696969		OpenSea	SH3RF2	NM_152550	Body	IL10L10F	-0.344708	0.00293726	0.00723471
cg23484741	chr5	142936868	-	cg23484741		OpenSea				IL10L10F	-0.210189	0.00294458	0.00724613
cg18442362	chr7	44677772	+	cg18442362		OpenSea	OGDH;OGDH;OGDH	NM_001003941;NM_001165036;NM_002541	Body;Body;Body	IL10L10F	-0.376754	0.0029599	0.00727721
cg24521685	chr4	185748534	-	cg24521685	chr4:185746557-185747827	S_Shore	ACSL1;ACSL1	NM_001286711;NM_001995	TSS1500;TSS1500	IL1raL10F	-0.150452	0.00296579	0.00727843
cg16493813	chr8	17521952	-	cg16493813		OpenSea	MTUS1;MTUS1;MTUS1;MTUS1;MTUS1	NM_001001931;NM_001001925;NM_001166393;NM_001001924;NM_020749	Body;Body;Body;Body;Body	IL6L10F	-0.123252	0.00296398	0.00727843
cg02156526	chr6	24934269	-	cg02156526		OpenSea	FAM65B;FAM65B	NM_001286445;NM_001286446	Body;Body	IL10L10F	-0.273162	0.00296897	0.00727963
cg02940661	chr14	106382755	+	cg02940661		OpenSea	KIAA0125	NR_026800	TSS1500	IL6L10F	0.115052	0.00298397	0.00730978
cg20320863	chr12	89575415	-	cg20320863		OpenSea				CRPL10F	-0.112559	0.00300024	0.00734298
cg21506763	chr3	38060329	-	cg21506763		OpenSea	PLCD1;PLCD1;PLCD1	NR_024071;NM_001130964;NM_006225	Body;Body;Body	IL1raL10F	0.157113	0.00303993	0.00743339
cg26543033	chr7	150056200	-	cg26543033		OpenSea				IL1raL10F	-0.141954	0.00304747	0.00744508
cg22830707	chr12	54332181	-	cg22830707	chr12:54332805-54333731	N_Shore	HOXC13	NM_017410	TSS1500	IL6L10F	0.0799179	0.00308396	0.00752743
cg17930583	chr6	29591082	+	cg17930583		OpenSea	GABBR1;GABBR1;GABBR1	NM_021904;NM_021903;NM_001470	Body;Body;Body	IL1BL10F	-0.175201	0.00310097	0.00756212
cg06705237	chr9	97402555	-	cg06705237	chr9:97401286-97402067	S_Shore	FBP1;FBP1	NM_001127628;NM_000507	TSS200;TSS1500	CRPL10F	-0.0937771	0.00311073	0.00757907
cg10243030	chr20	16156233	+	cg10243030		OpenSea				IL6L10F	0.230264	0.00316102	0.00769466
cg20179730	chr13	22111377	-	cg20179730		OpenSea	MICU2	NM_152726	Body	IL1BL10F	-0.358103	0.00318213	0.00773909
cg17823346	chr10	80848143	-	cg17823346		OpenSea	ZMIZ1	NM_020338	5'UTR	IL6L10F	0.0994735	0.00323226	0.00785392
cg10773266	chr10	43895225	+	cg10773266	chr10:43891546-43892917	S_Shelf	HNRNPF;HNRNPF;HNRNPF;HNRNPF	NM_001098205;NM_001098206;NM_001098204;NM_004966	5'UTR;5'UTR;5'UTR;5'UTR	IL1raL10F	-0.170985	0.00325511	0.00790234
cg13646708	chr11	102447295	+	cg13646708		OpenSea				IL6L10F	-0.261238	0.00327358	0.00794005
cg19821297	chr19	12890029	-	cg19821297	chr19:12889083-12889343	S_Shore				IL1BL10F	-0.279663	0.00328202	0.00795338
cg13257654	chr8	42946331	+	cg13257654	chr8:42948532-42948928	N_Shelf				TNFAL10F	0.196157	0.00332057	0.0080396
cg00533827	chr2	86163827	+	cg00533827		OpenSea				IL6L10F	-0.0979038	0.00332454	0.008042
cg15528722	chr5	40756846	+	cg15528722	chr5:40755537-40756257	S_Shore	TTC33	NM_012382	TSS1500	IL6L10F	-0.208394	0.00337739	0.00816254
cg26344619	chr14	76046018	+	cg26344619	chr14:76044590-76045102	S_Shore	FLVCR2	NM_017791	Body	IL1BL10F	-0.153949	0.00338836	0.00818172
cg08381918	chr21	43221841	+	cg08381918	chr21:43221474-43221842	Island	PRDM15;PRDM15	NM_022115;NM_001040424	Body;Body	IL6L10F	0.0955755	0.00339595	0.00818543
cg15528722	chr5	40756846	+	cg15528722	chr5:40755537-40756257	S_Shore	TTC33	NM_012382	TSS1500	IL1raL10F	-0.272761	0.00339574	0.00818543
cg06433467	chr5	67730071	-	cg06433467		OpenSea				IL10L10F	-0.434692	0.00352918	0.00849897
cg09029633	chr16	90077571	-	cg09029633		OpenSea	DBNDD1;DBNDD1;DBNDD1;DBNDD1	NM_001288708;NM_024043;NM_001042610;NM_001288709	Body;TSS1500;Body;Body	IL10L10F	0.193517	0.003542	0.00852225
cg00533827	chr2	86163827	+	cg00533827		OpenSea				IL10L10F	-0.158276	0.00356528	0.00857062
cg16713588	chr17	62274272	+	cg16713588		OpenSea	TEX2;TEX2;TEX2	NM_001288733;NM_001288732;NM_018469	Body;Body;Body	CRPL10F	-0.0753708	0.00356941	0.00857293
cg05859409	chr11	1799685	+	cg05859409		OpenSea				IL1raL10F	-0.23224	0.00359043	0.00861577
cg26073844	chr8	130799093	+	cg26073844		OpenSea	GSDMC;GSDMC	NM_031415;NM_031415	1stExon;5'UTR	IL6L10F	-0.118899	0.00364801	0.00874617
cg03464923	chr8	96115124	+	cg03464923		OpenSea				IL1BL10F	-0.269531	0.00366626	0.00878091
cg20644928	chr5	168418639	-	cg20644928		OpenSea	SLIT3;SLIT3	NM_003062;NM_001271946	Body;Body	CRPL10F	-0.0425023	0.003669	0.00878091
cg23484741	chr5	142936868	-	cg23484741		OpenSea				TNFR2L10F	-0.242901	0.00369871	0.00884418
cg04897299	chr6	21402890	-	cg04897299		OpenSea				CRPL10F	-0.106487	0.00372883	0.00890832
cg10243030	chr20	16156233	+	cg10243030		OpenSea				TNFR2L10F	0.486575	0.00376303	0.00898207
cg17108423	chr6	170559792	-	cg17108423		OpenSea				IL1raL10F	0.158271	0.00378122	0.00901754
cg20995564	chr2	145172035	-	cg20995564		OpenSea	ZEB2;ZEB2	NM_014795;NM_001171653	Body;Body	IL1raL10F	-0.606086	0.00381931	0.00910033
cg20248701	chr3	53868093	+	cg20248701		OpenSea	CHDH	NM_018397	5'UTR	IL1raL10F	-0.227378	0.00383652	0.0091333
cg19561181	chr20	56794558	-	cg19561181		OpenSea	ANKRD60	NM_001304369	Body	IL10L10F	-0.242785	0.00387066	0.00920645
cg19561181	chr20	56794558	-	cg19561181		OpenSea	ANKRD60	NM_001304369	Body	IL6L10F	-0.149802	0.00388213	0.0092256
cg16493813	chr8	17521952	-	cg16493813		OpenSea	MTUS1;MTUS1;MTUS1;MTUS1;MTUS1	NM_001001931;NM_001001925;NM_001166393;NM_001001924;NM_020749	Body;Body;Body;Body;Body	CRPL10F	-0.0657159	0.00388792	0.00923126
cg06527396	chr3	128959178	+	cg06527396		OpenSea				IL1raL10F	-0.212978	0.00393297	0.00932184
cg05380304	chr4	7755739	+	cg05380304		OpenSea	LOC84740	NR_026892	TSS200	IL10L10F	0.111861	0.00393081	0.00932184
cg25198113	chr1	5743886	-	cg25198113		OpenSea				IL10L10F	0.131296	0.00395492	0.00936564
cg01177100	chr3	9176211	-	cg01177100	chr3:9177691-9178189	N_Shore	SRGAP3;SRGAP3	NM_001033117;NM_014850	Body;Body	IL1raL10F	0.12269	0.00396886	0.00939043
cg12016267	chr22	42147356	+	cg12016267		OpenSea	MEI1	NM_152513	Body	IL6L10F	-0.105126	0.00403361	0.00953528
cg26615736	chr1	45267159	+	cg26615736	chr1:45265534-45266783	S_Shore	PLK3	NM_004073	Body	CRPL10F	-0.0639252	0.0040503	0.00956635
cg25371251	chr11	68483493	+	cg25371251		OpenSea	5	NM_004923	Body	IL6L10F	-0.16384	0.00409371	0.00966044
cg12644285	chr15	93570953	+	cg12644285		OpenSea	CHD2	NM_001271	3'UTR	TNFR2L10F	-0.291817	0.00412777	0.00973233
cg18563886	chr10	135203102	-	cg18563886	chr10:135203101-135203316	Island	PAOX;PAOX;PAOX	NM_207128;NM_152911;NM_207127	Body;Body;3'UTR	IL6L10F	0.197091	0.00416784	0.00981822
cg12992827	chr3	101901234	+	cg12992827		OpenSea				IL1BL10F	-0.453368	0.00430999	0.0101443
cg04621850	chr9	140067121	+	cg04621850	chr9:140068792-140069082	N_Shore	TMEM210	NM_001282477	TSS1500	IL1raL10F	0.193256	0.00432112	0.0101616
cg03356288	chr13	74639083	-	cg03356288		OpenSea	KLF12	NM_007249	5'UTR	IL10L10F	-0.143282	0.00432933	0.010172
cg08868697	chr20	52750124	-	cg08868697		OpenSea				IL10L10F	0.29903	0.00434777	0.0102065
cg10608465	chr19	13892443	+	cg10608465		OpenSea				IL1BL10F	-0.184158	0.00435583	0.0102077
cg17668435	chr3	171866136	+	cg17668435		OpenSea	FNDC3B;FNDC3B	NM_022763;NM_001135095	Body;Body	IL6L10F	-0.103055	0.00435339	0.0102077
cg18789123	chr2	29174857	-	cg18789123		OpenSea				IL1raL10F	-0.277165	0.00436473	0.0102197
cg19225696	chr1	201487263	+	cg19225696		OpenSea				IL6L10F	-0.168662	0.00437388	0.0102262
cg23013812	chr6	14841030	+	cg23013812		OpenSea				TNFAL10F	-0.357011	0.00437509	0.0102262
cg19136485	chr14	106385381	-	cg19136485		OpenSea	KIAA0125	NR_026800	Body	IL1raL10F	0.194012	0.00440875	0.010296
cg18710674	chr22	22762784	-	cg18710674		OpenSea				IL6L10F	-0.0892515	0.00445171	0.0103873
cg01183122	chr21	35884348	-	cg01183122		OpenSea	KCNE1	NM_000219	TSS1500	IL1raL10F	-0.169136	0.00449581	0.0104812
cg18844029	chr6	28885017	+	cg18844029		OpenSea	TRIM27	NM_006510	Body	CRPL10F	-0.117755	0.00457728	0.0106619
cg24522373	chr9	92331809	-	cg24522373		OpenSea	UNQ6494	NR_024280	Body	IL6L10F	0.149477	0.00458188	0.0106634
cg24418920	chr22	17709899	-	cg24418920		OpenSea				TNFR2L10F	-0.348288	0.00463856	0.0107861
cg13314505	chr11	133835493	+	cg13314505		OpenSea				IL1raL10F	-0.170497	0.00464978	0.0107936
cg26456810	chr17	42002103	+	cg26456810		OpenSea				IL6L10F	-0.0764923	0.00464885	0.0107936
cg06426077	chr4	86728891	-	cg06426077		OpenSea	ARHGAP24;ARHGAP24	NM_001025616;NM_001042669	Body;5'UTR	TNFR2L10F	-0.224149	0.00467994	0.0108543
cg25839023	chr3	22414349	+	cg25839023	chr3:22413492-22414365	Island				CRPL10F	0.08056	0.00469841	0.0108877
cg25501329	chr16	59934140	-	cg25501329		OpenSea	LOC101927580	NR_110917	Body	IL1BL10F	0.359078	0.00475035	0.0109987
cg08830689	chr6	138062303	+	cg08830689		OpenSea				TNFR2L10F	-0.361202	0.00477262	0.0110408
cg24572048	chr11	126041925	+	cg24572048		OpenSea				CRPL10F	-0.0662944	0.00478101	0.0110507
cg16713588	chr17	62274272	+	cg16713588		OpenSea	TEX2;TEX2;TEX2	NM_001288733;NM_001288732;NM_018469	Body;Body;Body	TNFR2L10F	-0.250578	0.00484276	0.0111839
cg17668435	chr3	171866136	+	cg17668435		OpenSea	FNDC3B;FNDC3B	NM_022763;NM_001135095	Body;Body	CRPL10F	-0.0559088	0.00486644	0.011229
cg04656009	chr17	32645806	-	cg04656009		OpenSea	CCL8	NM_005623	TSS1500	CRPL10F	-0.0677869	0.00489069	0.0112693
cg13978081	chr6	116952796	+	cg13978081		OpenSea	RSPH4A;RSPH4A	NM_001161664;NM_001010892	Body;Body	IL10L10F	0.150844	0.00489225	0.0112693
cg12847371	chr19	13056058	-	cg12847371	chr19:13056458-13057125	N_Shore	RAD23A;RAD23A;RAD23A;RAD23A	NM_001270363;NM_001270362;NM_005053;NR_072976	TSS1500;TSS1500;TSS1500;TSS1500	TNFAL10F	-0.32323	0.00493174	0.0113499
cg14187619	chr2	239343111	+	cg14187619	chr2:239344401-239344627	N_Shore	ASB1	NM_001040445	Body	IL1raL10F	-0.301668	0.00493565	0.0113499
cg13163786	chr11	121411582	+	cg13163786		OpenSea	SORL1	NM_003105	Body	IL1raL10F	-0.314741	0.00495725	0.0113899
cg12772487	chr20	33145872	-	cg12772487	chr20:33146135-33147318	N_Shore	MAP1LC3A;MAP1LC3A	NM_032514;NM_181509	TSS1500;Body	IL6L10F	0.0890864	0.0050384	0.0115567
cg20127419	chr1	112289991	-	cg20127419		OpenSea	FAM212B-AS1;FAM212B-AS1;FAM212B;LOC101928718	NR_038952;NR_038951;NM_198926;NR_125963	Body;Body;Body;Body	IL1BL10F	-0.259781	0.00503678	0.0115567
cg07138962	chr14	100035588	+	cg07138962		OpenSea	CCDC85C	NM_001144995	Body	IL1BL10F	0.211643	0.00506311	0.0116035
cg18146146	chr19	47247380	+	cg18146146	chr19:47248749-47249948	N_Shore	STRN4;STRN4	NM_001039877;NM_013403	Body;Body	IL1BL10F	-0.367247	0.00507489	0.0116206
cg27206232	chr13	103264306	-	cg27206232		OpenSea	TPP2	NM_003291	Body	IL1BL10F	0.266176	0.00508841	0.0116417
cg11104177	chr10	123605117	-	cg11104177		OpenSea	ATE1;ATE1;ATE1;ATE1;ATE1;ATE1	NR_110006;NM_001288734;NM_001288735;NM_007041;NM_001001976;NM_001288736	Body;Body;Body;Body;Body;Body	IL1raL10F	-0.382195	0.00510235	0.0116637
cg25488374	chr12	107799002	-	cg25488374		OpenSea	BTBD11	NM_001018072	Body	IL10L10F	-0.253717	0.00519227	0.0118586
cg14214717	chr20	5466839	-	cg14214717		OpenSea				CRPL10F	0.0435401	0.00519657	0.0118586
cg14954838	chr12	122293996	+	cg14954838		OpenSea	HPD;HPD	NM_001171993;NM_002150	Body;Body	TNFR2L10F	-0.420569	0.00520076	0.0118586
cg11807188	chr1	65924844	+	cg11807188		OpenSea	LEPR;LEPR;LEPR	NM_001003680;NM_001003679;NM_002303	5'UTR;5'UTR;5'UTR	IL10L10F	-0.130851	0.00523163	0.0119161
cg05809362	chr17	38699371	+	cg05809362		OpenSea				IL6L10F	-0.0877521	0.00523481	0.0119161
cg18789123	chr2	29174857	-	cg18789123		OpenSea				TNFR2L10F	-0.393555	0.00524929	0.011939
cg05773425	chr1	16644480	+	cg05773425		OpenSea	FBXO42	NM_018994	5'UTR	IL1raL10F	0.278079	0.0052638	0.011962
cg09977703	chr19	46854563	+	cg09977703	chr19:46850185-46850678	S_Shelf	PPP5C	NM_006247	Body	IL10L10F	-0.383474	0.00528639	0.0120032
cg08868697	chr20	52750124	-	cg08868697		OpenSea				IL6L10F	0.183818	0.00529099	0.0120036
cg18710674	chr22	22762784	-	cg18710674		OpenSea				CRPL10F	-0.0484052	0.00538887	0.0122154
cg11807188	chr1	65924844	+	cg11807188		OpenSea	LEPR;LEPR;LEPR	NM_001003680;NM_001003679;NM_002303	5'UTR;5'UTR;5'UTR	IL6L10F	-0.0802919	0.00540801	0.0122485
cg20991997	chr11	113844406	+	cg20991997		OpenSea	HTR3A;HTR3A;HTR3A	NM_213621;NM_000869;NR_046363	TSS1500;TSS1500;TSS1500	CRPL10F	0.0880304	0.00544368	0.0123189
cg07411165	chr4	146761480	-	cg07411165		OpenSea	ZNF827	NM_178835	Body	CRPL10F	-0.0857914	0.00548026	0.0123914
cg24016995	chr10	129868149	+	cg24016995		OpenSea	PTPRE;PTPRE	NM_130435;NM_006504	Body;Body	CRPL10F	-0.0734398	0.00550548	0.012438
cg06092244	chr2	48796151	-	cg06092244		OpenSea	STON1-GTF2A1L	NM_172311	TSS200	IL1BL10F	-0.535232	0.00558137	0.0125989
cg14214717	chr20	5466839	-	cg14214717		OpenSea				IL1raL10F	0.103229	0.00559393	0.0126167
cg14195992	chr8	48265917	-	cg14195992		OpenSea	KIAA0146	NM_001080394	Body	IL1raL10F	-0.217224	0.005722	0.0128948
cg03856470	chr16	1309414	+	cg03856470	chr16:1309157-1309415	Island				IL6L10F	0.0723978	0.00573452	0.0129122
cg02287483	chr8	105848201	-	cg02287483		OpenSea				IL1BL10F	-0.216369	0.00576592	0.0129721
cg05809362	chr17	38699371	+	cg05809362		OpenSea				CRPL10F	-0.0488937	0.00577608	0.0129842
cg07388661	chr6	158663595	-	cg07388661		OpenSea				IL10L10F	-0.247331	0.00582187	0.0130762
cg16161069	chr16	442770	-	cg16161069		OpenSea	LOC100134368	NR_024453	Body	IL1raL10F	0.211838	0.00605683	0.0135926
cg17930583	chr6	29591082	+	cg17930583		OpenSea	GABBR1;GABBR1;GABBR1	NM_021904;NM_021903;NM_001470	Body;Body;Body	IL6L10F	-0.0892557	0.00614012	0.0137681
cg18146146	chr19	47247380	+	cg18146146	chr19:47248749-47249948	N_Shore	STRN4;STRN4	NM_001039877;NM_013403	Body;Body	TNFAL10F	-0.384339	0.00626089	0.0140273
cg17098449	chr22	31364349	-	cg17098449	chr22:31364564-31365575	N_Shore	TUG1;MORC2	NR_002323;NM_014941	TSS1500;TSS200	CRPL10F	-0.0623331	0.00628567	0.0140712
cg25488374	chr12	107799002	-	cg25488374		OpenSea	BTBD11	NM_001018072	Body	TNFAL10F	-0.285869	0.00632392	0.0141451
cg08714061	chr9	126908822	-	cg08714061		OpenSea				IL1raL10F	-0.245348	0.00633382	0.0141555
cg06166051	chr2	179696896	+	cg06166051		OpenSea	CCDC141	NM_173648	3'UTR	CRPL10F	-0.0707655	0.00644533	0.0143928
cg15413523	chr5	133451625	-	cg15413523	chr5:133449320-133451260	S_Shore	TCF7;TCF7;TCF7;TCF7;TCF7;TCF7;TCF7;TCF7;TCF7;TCF7	NM_213648;NM_001134852;NM_201632;NM_201633;NM_001134851;NM_201634;NM_001134851;NM_003202;NM_213648;NM_001134852	5'UTR;1stExon;5'UTR;5'UTR;1stExon;5'UTR;5'UTR;Body;1stExon;5'UTR	IL1raL10F	0.0880455	0.00645301	0.014398
cg03304763	chr11	112037427	+	cg03304763		OpenSea	TEX12	NM_031275	TSS1500	IL10L10F	-0.291544	0.00647	0.014424
cg17774776	chr5	6638536	+	cg17774776		OpenSea	SRD5A1	NM_001047	Body	IL10L10F	-0.275143	0.00651212	0.014506
cg25082943	chr12	93367516	+	cg25082943		OpenSea				IL1raL10F	-0.209982	0.00657342	0.0146305
cg01225452	chr4	48972831	-	cg01225452		OpenSea				IL1BL10F	-0.210631	0.00664871	0.0147859
cg13314505	chr11	133835493	+	cg13314505		OpenSea				CRPL10F	-0.0685627	0.00677276	0.0150493
cg04897299	chr6	21402890	-	cg04897299		OpenSea				IL1raL10F	-0.235176	0.00679191	0.0150795
cg15549550	chr2	11857010	-	cg15549550		OpenSea	LPIN1	NM_001261428	Body	IL1raL10F	-0.168451	0.00680798	0.0151028
cg18170385	chr10	330411	+	cg18170385		OpenSea	DIP2C	NM_014974	Body	TNFR2L10F	-0.244649	0.00685297	0.0151901
cg17230773	chr7	142494148	+	cg17230773	chr7:142494563-142495248	N_Shore				IL6L10F	0.103425	0.00687702	0.0152309
cg01589514	chr17	79526378	-	cg01589514		OpenSea	NPLOC4;NPLOC4;NPLOC4	NR_130140;NR_130139;NM_017921	Body;Body;Body	IL1raL10F	0.130036	0.00688785	0.0152424
cg10351852	chr3	45706990	+	cg10351852		OpenSea	LIMD1	NM_014240	Body	IL10L10F	0.171375	0.0069447	0.0153556
cg08714061	chr9	126908822	-	cg08714061		OpenSea				IL6L10F	-0.17938	0.00695744	0.0153712
cg04231870	chr11	65618874	-	cg04231870		OpenSea	SNX32;SNX32	NM_152760;NM_152760	ExonBnd;Body	IL10L10F	-0.244535	0.00704425	0.0155503
cg18850465	chr16	50718807	-	cg18850465		OpenSea				IL6L10F	-0.0729904	0.00711737	0.0156989
cg16545370	chr18	42475531	+	cg16545370		OpenSea	SETBP1	NM_015559	Body	IL6L10F	-0.135175	0.00715152	0.0157613
cg07443710	chr10	71206848	-	cg07443710		OpenSea				CRPL10F	-0.0895939	0.00721311	0.0158841
cg26977749	chr7	98477833	+	cg26977749	chr7:98476004-98476954	S_Shore	TRRAP;TRRAP;MIR3609	NM_001244580;NM_003496;NR_037403	5'UTR;5'UTR;TSS1500	CRPL10F	0.0734922	0.00726827	0.0159926
cg06019998	chr17	15845440	-	cg06019998	chr17:15847757-15849513	N_Shelf				IL1BL10F	-0.541729	0.00729632	0.0160412
cg04512965	chr19	6038846	-	cg04512965	chr19:6039990-6040228	N_Shore	RFX2;RFX2	NM_000635;NM_134433	Body;Body	IL10L10F	-0.168097	0.00734532	0.0161227
cg06170374	chr11	37533403	-	cg06170374		OpenSea				IL10L10F	-0.234456	0.0073448	0.0161227
cg19136485	chr14	106385381	-	cg19136485		OpenSea	KIAA0125	NR_026800	Body	TNFAL10F	0.271232	0.00736347	0.0161494
cg04268643	chr17	76037239	+	cg04268643	chr17:76037074-76037323	Island	TNRC6C;TNRC6C	NM_018996;NM_001142640	5'UTR;5'UTR	IL1BL10F	0.163542	0.0074235	0.0162679
cg04364800	chr3	160653423	+	cg04364800		OpenSea	PPM1L	NM_139245	Body	IL6L10F	-0.0973292	0.00744693	0.016306
cg25645302	chr16	67642367	+	cg25645302		OpenSea	CTCF;CTCF	NM_006565;NM_001191022	5'UTR;5'UTR	TNFR2L10F	-0.200692	0.00748915	0.0163852
cg02287483	chr8	105848201	-	cg02287483		OpenSea				IL6L10F	-0.119295	0.00751306	0.0164242
cg17076667	chr10	121418050	-	cg17076667		OpenSea	BAG3	NM_004281	Body	IL6L10F	-0.128136	0.00755681	0.0165065
cg16669300	chr9	134882463	-	cg16669300		OpenSea	MED27;MED27	NM_004269;NM_001253881	Body;Body	IL1BL10F	-0.32251	0.00760796	0.0166048
cg24272019	chr14	106376379	-	cg24272019		OpenSea				IL6L10F	0.143224	0.00763554	0.0166381
cg00301390	chr17	16749537	+	cg00301390		OpenSea				CRPL10F	0.0508653	0.00763082	0.0166381
cg21457573	chr1	6822395	-	cg21457573		OpenSea				TNFR2L10F	-0.225892	0.00776091	0.0168976
cg07443710	chr10	71206848	-	cg07443710		OpenSea				IL10L10F	-0.257864	0.00777845	0.0169222
cg19136485	chr14	106385381	-	cg19136485		OpenSea	KIAA0125	NR_026800	Body	CRPL10F	0.074818	0.0078742	0.0171167
cg22830707	chr12	54332181	-	cg22830707	chr12:54332805-54333731	N_Shore	HOXC13	NM_017410	TSS1500	IL1BL10F	0.131474	0.0079381	0.0172418
cg00789528	chr20	42543034	+	cg00789528	chr20:42543097-42545137	N_Shore	TOX2	NM_001098797	TSS1500	IL6L10F	0.0833166	0.00794738	0.0172481
cg17076667	chr10	121418050	-	cg17076667		OpenSea	BAG3	NM_004281	Body	TNFAL10F	-0.25783	0.00801741	0.0173861
cg19561181	chr20	56794558	-	cg19561181		OpenSea	ANKRD60	NM_001304369	Body	CRPL10F	-0.0776285	0.00810016	0.0175514
cg15177686	chr4	185828927	-	cg15177686		OpenSea				IL1raL10F	-0.171346	0.00811333	0.0175659
cg26312071	chr15	90727783	+	cg26312071	chr15:90727879-90728570	N_Shore	SEMA4B	NM_020210	TSS1500	IL1BL10F	-0.245648	0.00816368	0.0176607
cg05866150	chr14	21317205	-	cg05866150		OpenSea				TNFR2L10F	-0.288195	0.00819278	0.0177095
cg08732950	chr16	89023389	+	cg08732950		OpenSea	CBFA2T3	NM_005187	Body	IL1BL10F	0.154608	0.00820569	0.0177232
cg14185504	chr6	110094128	+	cg14185504		OpenSea	FIG4	NM_014845	Body	IL6L10F	-0.092217	0.0084169	0.0181649
cg08506528	chr10	4093714	-	cg08506528		OpenSea	LOC101927964	NR_120632	TSS1500	IL10L10F	-0.223738	0.00845268	0.0182276
cg03337382	chr10	125960385	+	cg03337382		OpenSea				CRPL10F	-0.0838784	0.00847332	0.0182433
cg03464923	chr8	96115124	+	cg03464923		OpenSea				IL1raL10F	-0.179772	0.0084735	0.0182433
cg06380030	chr14	65459268	-	cg06380030		OpenSea	FNTB;CHURC1-FNTB;CHURC1-FNTB	NM_002028;NM_001202559;NM_001202558	Body;Body;Body	TNFR2L10F	-0.303286	0.00874706	0.0188173
cg26977749	chr7	98477833	+	cg26977749	chr7:98476004-98476954	S_Shore	TRRAP;TRRAP;MIR3609	NM_001244580;NM_003496;NR_037403	5'UTR;5'UTR;TSS1500	IL10L10F	0.206365	0.00886684	0.0190598
cg12839166	chr11	5462320	+	cg12839166		OpenSea	OR51I1;OR51B5;OR51B5	NM_001005288;NR_038321;NM_001005567	1stExon;Body;5'UTR	TNFAL10F	0.254521	0.00896901	0.0192641
cg13990362	chr4	117474275	-	cg13990362		OpenSea				CRPL10F	-0.05779	0.00903076	0.0193814
cg21871141	chr13	26597180	-	cg21871141		OpenSea				IL6L10F	-0.0856654	0.00915214	0.0195952
cg03924136	chr20	62367108	-	cg03924136	chr20:62368955-62371962	N_Shore	LIME1;LIME1;LIME1;LIME1;ZGPAT;ZGPAT;ZGPAT;ZGPAT;ZGPAT	NM_017806;NM_001305655;NM_001305654;NM_001305654;NM_181485;NM_001195654;NM_001195653;NM_032527;NM_001083113	TSS1500;TSS1500;1stExon;5'UTR;Body;Body;Body;Body;Body	IL1raL10F	0.218146	0.0091521	0.0195952
cg04501408	chr5	141551033	-	cg04501408		OpenSea				IL6L10F	-0.114246	0.00913955	0.0195952
cg24522373	chr9	92331809	-	cg24522373		OpenSea	UNQ6494	NR_024280	Body	IL10L10F	0.222794	0.00919511	0.0196716
cg17668435	chr3	171866136	+	cg17668435		OpenSea	FNDC3B;FNDC3B	NM_022763;NM_001135095	Body;Body	TNFR2L10F	-0.175262	0.00952195	0.0203547
cg12242258	chr21	35884230	-	cg12242258		OpenSea	KCNE1;KCNE1;KCNE1;KCNE1	NM_001270403;NM_001270404;NM_001270402;NM_000219	TSS1500;TSS1500;TSS1500;5'UTR	TNFR2L10F	-0.216628	0.00960772	0.0205218
cg26089920	chr18	22494802	+	cg26089920		OpenSea				IL10L10F	-0.110368	0.00961975	0.0205312
cg12847371	chr19	13056058	-	cg12847371	chr19:13056458-13057125	N_Shore	RAD23A;RAD23A;RAD23A;RAD23A	NM_001270363;NM_001270362;NM_005053;NR_072976	TSS1500;TSS1500;TSS1500;TSS1500	IL1BL10F	-0.283296	0.00972336	0.020736
cg27339271	chr10	90553647	-	cg27339271		OpenSea				IL10L10F	-0.306281	0.00991915	0.0211369
cg02287483	chr8	105848201	-	cg02287483		OpenSea				IL10L10F	-0.181784	0.00994484	0.0211749
cg08928261	chr4	40240766	-	cg08928261		OpenSea	RHOH;RHOH;RHOH;RHOH;RHOH;RHOH;RHOH;RHOH;RHOH;RHOH;RHOH;RHOH	NM_001278368;NM_001278367;NM_001278366;NM_001278365;NM_001278364;NM_001278369;NM_004310;NM_001278363;NM_001278362;NM_001278361;NM_001278360;NM_001278359	5'UTR;5'UTR;5'UTR;5'UTR;5'UTR;5'UTR;5'UTR;5'UTR;5'UTR;5'UTR;5'UTR;5'UTR	IL1raL10F	-0.226794	0.0100196	0.0213173
cg13978081	chr6	116952796	+	cg13978081		OpenSea	RSPH4A;RSPH4A	NM_001161664;NM_001010892	Body;Body	IL6L10F	0.0841497	0.0100445	0.0213534
cg26468118	chr13	111175670	-	cg26468118		OpenSea	RAB20	NM_017817	3'UTR	IL1raL10F	-0.21205	0.0100528	0.0213544
cg04512965	chr19	6038846	-	cg04512965	chr19:6039990-6040228	N_Shore	RFX2;RFX2	NM_000635;NM_134433	Body;Body	IL6L10F	-0.100167	0.0101027	0.0214435
cg25371251	chr11	68483493	+	cg25371251		OpenSea	5	NM_004923	Body	TNFR2L10F	-0.268642	0.0101453	0.0215169
cg26955383	chr10	105218660	-	cg26955383	chr10:105217966-105218287	S_Shore	CALHM1	NM_001001412	TSS200	IL1BL10F	0.250883	0.0101801	0.0215738
cg04415310	chr12	124743637	+	cg04415310		OpenSea	ZNF664-FAM101A	NM_001204299	5'UTR	TNFAL10F	0.44783	0.0102283	0.021659
cg08951566	chr15	38122448	-	cg08951566		OpenSea				TNFR2L10F	-0.188634	0.0103088	0.0218124
cg08917665	chr12	9861036	-	cg08917665		OpenSea				IL10L10F	-0.206564	0.0103493	0.0218808
cg04364800	chr3	160653423	+	cg04364800		OpenSea	PPM1L	NM_139245	Body	IL10L10F	-0.149753	0.0103807	0.0219301
cg16218494	chr11	34426751	+	cg16218494		OpenSea				CRPL10F	-0.121158	0.0104912	0.0221463
cg08506528	chr10	4093714	-	cg08506528		OpenSea	LOC101927964	NR_120632	TSS1500	CRPL10F	-0.075164	0.0105512	0.0222555
cg10241823	chr17	841205	+	cg10241823		OpenSea	NXN	NM_022463	Body	IL1raL10F	0.128056	0.0105681	0.0222738
cg05331214	chr2	167343774	+	cg05331214		OpenSea	SCN7A	NM_002976	TSS1500	TNFR2L10F	-0.270711	0.0105959	0.0223151
cg01436651	chr18	52029246	-	cg01436651		OpenSea				IL6L10F	-0.110479	0.0107214	0.0225616
cg26615736	chr1	45267159	+	cg26615736	chr1:45265534-45266783	S_Shore	PLK3	NM_004073	Body	IL1raL10F	-0.134339	0.010804	0.0227178
cg08040689	chr10	88124374	-	cg08040689	chr10:88122924-88127364	Island	GRID1	NM_017551	Body	IL6L10F	0.0734232	0.0108426	0.0227812
cg13827209	chr9	101912842	+	cg13827209		OpenSea	TGFBR1;TGFBR1	NM_001130916;NM_004612	3'UTR;3'UTR	TNFAL10F	0.409659	0.011105	0.0233144
cg05165365	chr11	48151361	+	cg05165365		OpenSea	PTPRJ;PTPRJ	NM_001098503;NM_002843	Body;Body	IL1BL10F	-0.242871	0.0111255	0.0233393
cg10027857	chr17	76595619	+	cg10027857		OpenSea				IL10L10F	-0.176666	0.0111387	0.0233488
cg18765405	chr5	134644263	-	cg18765405		OpenSea				TNFAL10F	-0.286511	0.0112596	0.0235841
cg09536564	chr1	221467746	-	cg09536564		OpenSea				IL1raL10F	-0.176327	0.0113371	0.0237279
cg27218041	chr1	59953216	-	cg27218041		OpenSea	FGGY;FGGY;FGGY;FGGY	NM_018291;NM_001244714;NM_001113411;NR_103473	Body;Body;Body;Body	IL1BL10F	0.180458	0.0114691	0.0239858
cg08732950	chr16	89023389	+	cg08732950		OpenSea	CBFA2T3	NM_005187	Body	TNFAL10F	0.159832	0.0114876	0.0240059
cg02094077	chr12	101604137	+	cg02094077	chr12:101603387-101603933	S_Shore	SLC5A8	NM_145913	TSS200	IL10L10F	0.107102	0.011517	0.0240487
cg24023352	chr10	49540488	-	cg24023352		OpenSea	MAPK8	NM_001278547	5'UTR	IL1raL10F	-0.377249	0.0115697	0.0241031
cg25488374	chr12	107799002	-	cg25488374		OpenSea	BTBD11	NM_001018072	Body	IL1raL10F	-0.185225	0.0115676	0.0241031
cg18685080	chr16	81553347	+	cg18685080		OpenSea	CMIP;CMIP	NM_198390;NM_030629	Body;Body	TNFAL10F	-0.213474	0.0115698	0.0241031
cg23468312	chr8	130426887	-	cg23468312		OpenSea	CCDC26;CCDC26;CCDC26;CCDC26	NR_130918;NR_130919;NR_130920;NR_130917	Body;Body;Body;Body	CRPL10F	-0.0849891	0.0116233	0.0241959
cg05829046	chr7	2557446	+	cg05829046	chr7:2558371-2559967	N_Shore	LFNG;LFNG	NM_001166355;NM_002304	Body;TSS200	CRPL10F	-0.0598762	0.0117616	0.0244649
cg09902898	chr4	110001222	-	cg09902898		OpenSea	COL25A1;COL25A1;COL25A1;COL25A1	NR_045756;NM_198721;NM_001256074;NM_032518	Body;Body;Body;Body	IL1raL10F	-0.235992	0.0117903	0.0244691
cg08880154	chr1	86926798	-	cg08880154		OpenSea				TNFR2L10F	-0.144231	0.0117734	0.0244691
cg23305420	chr11	109948734	-	cg23305420		OpenSea				IL1raL10F	-0.25771	0.0117908	0.0244691
cg26543033	chr7	150056200	-	cg26543033		OpenSea				CRPL10F	-0.0509806	0.0118687	0.0246118
cg20127419	chr1	112289991	-	cg20127419		OpenSea	FAM212B-AS1;FAM212B-AS1;FAM212B;LOC101928718	NR_038952;NR_038951;NM_198926;NR_125963	Body;Body;Body;Body	TNFAL10F	-0.244741	0.0119101	0.0246787
cg18563886	chr10	135203102	-	cg18563886	chr10:135203101-135203316	Island	PAOX;PAOX;PAOX	NM_207128;NM_152911;NM_207127	Body;Body;3'UTR	IL1raL10F	0.235806	0.0119523	0.0247472
cg26543033	chr7	150056200	-	cg26543033		OpenSea				TNFR2L10F	-0.176595	0.0119693	0.0247634
cg26456810	chr17	42002103	+	cg26456810		OpenSea				IL10L10F	-0.108523	0.0119852	0.0247773
cg27119904	chr13	114814333	-	cg27119904	chr13:114813942-114814457	Island	RASA3	NM_007368	Body	IL1raL10F	0.11719	0.0120957	0.0249868
cg08868697	chr20	52750124	-	cg08868697		OpenSea				IL1BL10F	0.295991	0.0121249	0.0250279
cg18710674	chr22	22762784	-	cg18710674		OpenSea				TNFR2L10F	-0.155084	0.0121683	0.0250791
cg04512965	chr19	6038846	-	cg04512965	chr19:6039990-6040228	N_Shore	RFX2;RFX2	NM_000635;NM_134433	Body;Body	IL1raL10F	-0.126786	0.0121631	0.0250791
cg04874562	chr11	5462540	+	cg04874562		OpenSea	OR51I1	NM_001005288	1stExon	TNFAL10F	0.18725	0.0122643	0.0252577
cg09659000	chr1	13820748	+	cg09659000		OpenSea	LRRC38	NM_001010847	Body	TNFR2L10F	0.524361	0.0123607	0.0254369
cg12016267	chr22	42147356	+	cg12016267		OpenSea	MEI1	NM_152513	Body	IL1BL10F	-0.162316	0.0124171	0.0255335
cg13538554	chr14	57050624	+	cg13538554	chr14:57046472-57046804	S_Shelf	TMEM260	NM_017799	Body	IL1raL10F	-0.211908	0.0124273	0.0255351
cg23484741	chr5	142936868	-	cg23484741		OpenSea				TNFAL10F	-0.203325	0.0124761	0.0256157
cg03216966	chr7	733282	-	cg03216966		OpenSea	PRKAR1B;PRKAR1B;PRKAR1B;PRKAR1B;PRKAR1B;PRKAR1B	NM_001164759;NM_001164762;NM_001164758;NM_001164760;NM_001164761;NM_002735	Body;Body;Body;Body;Body;Body	IL10L10F	-0.26258	0.0125448	0.0257372
cg18146146	chr19	47247380	+	cg18146146	chr19:47248749-47249948	N_Shore	STRN4;STRN4	NM_001039877;NM_013403	Body;Body	IL1raL10F	-0.238526	0.0125765	0.0257791
cg01015210	chr5	141475540	-	cg01015210		OpenSea				IL1raL10F	-0.228108	0.0125842	0.0257791
cg05829046	chr7	2557446	+	cg05829046	chr7:2558371-2559967	N_Shore	LFNG;LFNG	NM_001166355;NM_002304	Body;TSS200	IL6L10F	-0.109572	0.0126403	0.0258743
cg15413523	chr5	133451625	-	cg15413523	chr5:133449320-133451260	S_Shore	TCF7;TCF7;TCF7;TCF7;TCF7;TCF7;TCF7;TCF7;TCF7;TCF7	NM_213648;NM_001134852;NM_201632;NM_201633;NM_001134851;NM_201634;NM_001134851;NM_003202;NM_213648;NM_001134852	5'UTR;1stExon;5'UTR;5'UTR;1stExon;5'UTR;5'UTR;Body;1stExon;5'UTR	TNFR2L10F	0.125309	0.0126612	0.0258974
cg04323816	chr22	40784430	+	cg04323816		OpenSea	SGSM3;SGSM3	NM_015705;NM_001301849	5'UTR;5'UTR	IL1raL10F	0.0911886	0.0129019	0.0263698
cg19136485	chr14	106385381	-	cg19136485		OpenSea	KIAA0125	NR_026800	Body	IL1BL10F	0.229114	0.0129442	0.0264362
cg25645302	chr16	67642367	+	cg25645302		OpenSea	CTCF;CTCF	NM_006565;NM_001191022	5'UTR;5'UTR	IL6L10F	-0.0983292	0.0129905	0.0265109
cg24331727	chr11	16213327	-	cg24331727		OpenSea	SOX6;SOX6;SOX6;SOX6	NM_001145811;NM_033326;NM_017508;NM_001145819	Body;Body;Body;Body	TNFAL10F	0.16502	0.013077	0.0266671
cg02940661	chr14	106382755	+	cg02940661		OpenSea	KIAA0125	NR_026800	TSS1500	CRPL10F	0.0541958	0.0131132	0.0267059
cg08868697	chr20	52750124	-	cg08868697		OpenSea				CRPL10F	0.0915799	0.0131157	0.0267059
cg07443710	chr10	71206848	-	cg07443710		OpenSea				IL6L10F	-0.149714	0.0132505	0.0269601
cg13304206	chr4	40562130	+	cg13304206		OpenSea	RBM47	NM_001098634	5'UTR	IL10L10F	-0.269285	0.0132613	0.0269616
cg11558387	chr1	118139009	+	cg11558387		OpenSea				IL10L10F	-0.220347	0.0134147	0.0272531
cg06170374	chr11	37533403	-	cg06170374		OpenSea				IL1raL10F	-0.178671	0.0134331	0.0272699
cg18850465	chr16	50718807	-	cg18850465		OpenSea				TNFR2L10F	-0.138079	0.0135503	0.0274872
cg03464923	chr8	96115124	+	cg03464923		OpenSea				IL6L10F	-0.125679	0.0136514	0.0276716
cg24274865	chr1	206946595	-	cg24274865		OpenSea	IL10	NM_000572	TSS1500	CRPL10F	-0.067713	0.0136754	0.0276994
cg22830707	chr12	54332181	-	cg22830707	chr12:54332805-54333731	N_Shore	HOXC13	NM_017410	TSS1500	IL10L10F	0.108036	0.0137446	0.0278186
cg13538554	chr14	57050624	+	cg13538554	chr14:57046472-57046804	S_Shelf	TMEM260	NM_017799	Body	IL1BL10F	-0.289649	0.0138927	0.0280974
cg18330082	chr10	134983749	+	cg18330082	chr10:134980302-134981059	S_Shelf	KNDC1	NM_152643	Body	TNFR2L10F	0.266703	0.0139522	0.0281966
cg03464923	chr8	96115124	+	cg03464923		OpenSea				TNFAL10F	-0.245764	0.0139939	0.0282597
cg02094077	chr12	101604137	+	cg02094077	chr12:101603387-101603933	S_Shore	SLC5A8	NM_145913	TSS200	IL6L10F	0.0634806	0.0140308	0.0283131
cg13304206	chr4	40562130	+	cg13304206		OpenSea	RBM47	NM_001098634	5'UTR	TNFAL10F	-0.301117	0.01411	0.0284516
cg10867751	chr1	25870981	-	cg10867751	chr1:25869893-25871042	Island	LDLRAP1	NM_015627	Body	IL6L10F	0.0623036	0.0143109	0.0288353
cg09062752	chr9	71443046	-	cg09062752		OpenSea	PIP5K1B;PIP5K1B	NM_003558;NM_001278253	Body;Body	CRPL10F	-0.0693956	0.0144921	0.0291785
cg00619207	chr1	111743368	+	cg00619207	chr1:111746337-111747303	N_Shelf	DENND2D	NM_024901	TSS200	IL1raL10F	-0.150809	0.014606	0.0293861
cg12772487	chr20	33145872	-	cg12772487	chr20:33146135-33147318	N_Shore	MAP1LC3A;MAP1LC3A	NM_032514;NM_181509	TSS1500;Body	TNFR2L10F	0.163888	0.0146435	0.0293959
cg25645302	chr16	67642367	+	cg25645302		OpenSea	CTCF;CTCF	NM_006565;NM_001191022	5'UTR;5'UTR	CRPL10F	-0.0529912	0.0146343	0.0293959
cg18563886	chr10	135203102	-	cg18563886	chr10:135203101-135203316	Island	PAOX;PAOX;PAOX	NM_207128;NM_152911;NM_207127	Body;Body;3'UTR	IL1BL10F	0.308373	0.0146322	0.0293959
cg07197752	chr1	156600922	-	cg07197752		OpenSea				IL6L10F	0.108434	0.0149689	0.0300267
cg05092891	chr21	37535885	-	cg05092891		OpenSea	DOPEY2	NM_005128	TSS1500	IL1raL10F	-0.183301	0.0150524	0.0301718
cg04903159	chr6	44202699	-	cg04903159	chr6:44205686-44205931	N_Shelf				IL10L10F	0.131862	0.0151634	0.0303718
cg17668435	chr3	171866136	+	cg17668435		OpenSea	FNDC3B;FNDC3B	NM_022763;NM_001135095	Body;Body	IL1raL10F	-0.113353	0.0153097	0.030642
cg27206232	chr13	103264306	-	cg27206232		OpenSea	TPP2	NM_003291	Body	IL1raL10F	0.167325	0.0154346	0.0308692
cg04797496	chr5	141339086	+	cg04797496		OpenSea	PCDH12	NM_016580	TSS1500	IL10L10F	-0.150674	0.0154683	0.0309138
cg25839023	chr3	22414349	+	cg25839023	chr3:22413492-22414365	Island				TNFR2L10F	0.234742	0.0156909	0.0313354
cg18844029	chr6	28885017	+	cg18844029		OpenSea	TRIM27	NM_006510	Body	IL1raL10F	-0.244441	0.0157214	0.0313731
cg14185504	chr6	110094128	+	cg14185504		OpenSea	FIG4	NM_014845	Body	IL1raL10F	-0.109428	0.0157868	0.0314805
cg03487391	chr2	219596537	-	cg03487391		OpenSea	TTLL4	NM_014640	5'UTR	IL10L10F	-0.260932	0.0158085	0.031482
cg06636195	chr2	109533679	-	cg06636195		OpenSea	EDAR	NM_022336	Body	IL10L10F	0.352373	0.0158109	0.031482
cg26416615	chr10	63751843	+	cg26416615		OpenSea	ARID5B	NM_032199	Body	IL1BL10F	-0.393708	0.0158778	0.0315919
cg05333174	chr22	43163057	+	cg05333174	chr22:43165947-43166287	N_Shelf				IL1raL10F	0.236756	0.0160993	0.032009
cg24835232	chr6	24165957	-	cg24835232		OpenSea				CRPL10F	-0.0480992	0.0162041	0.0321937
cg20747266	chr6	142409507	+	cg20747266	chr6:142409473-142410112	Island	NMBR	NM_002511	1stExon	IL1BL10F	0.229367	0.016219	0.0321997
cg11731280	chr9	140066934	-	cg11731280	chr9:140068792-140069082	N_Shore	TMEM210	NM_001282477	TSS1500	IL1raL10F	0.172939	0.0162358	0.0322094
cg20733017	chr7	157618302	-	cg20733017	chr7:157618856-157619302	N_Shore	PTPRN2;PTPRN2;PTPRN2;PTPRN2;PTPRN2	NM_001308268;NM_002847;NM_130843;NM_130842;NM_001308267	Body;Body;Body;Body;Body	IL1raL10F	0.106652	0.0163302	0.0323491
cg08040689	chr10	88124374	-	cg08040689	chr10:88122924-88127364	Island	GRID1	NM_017551	Body	IL1BL10F	0.131802	0.0163212	0.0323491
cg12800932	chr7	158611626	+	cg12800932		OpenSea	ESYT2	NM_020728	Body	TNFAL10F	-0.594772	0.0163534	0.0323714
cg15528722	chr5	40756846	+	cg15528722	chr5:40755537-40756257	S_Shore	TTC33	NM_012382	TSS1500	IL1BL10F	-0.308235	0.0164426	0.0325241
cg21871141	chr13	26597180	-	cg21871141		OpenSea				CRPL10F	-0.042987	0.0164734	0.0325612
cg20559059	chr10	134178970	+	cg20559059		OpenSea	LRRC27;LRRC27;LRRC27	NM_030626;NM_001143757;NM_001309474	Body;Body;Body	IL6L10F	0.0831619	0.0164999	0.0325898
cg24672565	chr3	14382884	+	cg24672565		OpenSea				IL1raL10F	0.127899	0.0166493	0.0328608
cg23013812	chr6	14841030	+	cg23013812		OpenSea				IL1BL10F	-0.279651	0.0166742	0.0328859
cg14204372	chr3	18031135	-	cg14204372		OpenSea	LOC339862	NM_001257177	Body	IL10L10F	-0.19813	0.0168435	0.0331955
cg03464923	chr8	96115124	+	cg03464923		OpenSea				CRPL10F	-0.0676159	0.0168695	0.0332225
cg02300329	chr14	55574999	-	cg02300329		OpenSea				TNFAL10F	-0.199644	0.01697	0.0333962
cg04231870	chr11	65618874	-	cg04231870		OpenSea	SNX32;SNX32	NM_152760;NM_152760	ExonBnd;Body	IL1raL10F	-0.173861	0.0170282	0.0334864
cg27119904	chr13	114814333	-	cg27119904	chr13:114813942-114814457	Island	RASA3	NM_007368	Body	TNFR2L10F	0.176536	0.0171539	0.0337089
cg06380030	chr14	65459268	-	cg06380030		OpenSea	FNTB;CHURC1-FNTB;CHURC1-FNTB	NM_002028;NM_001202559;NM_001202558	Body;Body;Body	IL10L10F	-0.234735	0.0172738	0.0339199
cg00812927	chr5	17261518	+	cg00812927		OpenSea	BASP1;BASP1	NM_001271606;NM_006317	5'UTR;5'UTR	CRPL10F	-0.065444	0.017412	0.0341665
cg13316148	chr2	191916269	+	cg13316148		OpenSea	STAT4	NM_003151	Body	IL1raL10F	-0.252098	0.0175165	0.0343465
cg05829046	chr7	2557446	+	cg05829046	chr7:2558371-2559967	N_Shore	LFNG;LFNG	NM_001166355;NM_002304	Body;TSS200	TNFR2L10F	-0.188357	0.0175539	0.0343949
cg15413523	chr5	133451625	-	cg15413523	chr5:133449320-133451260	S_Shore	TCF7;TCF7;TCF7;TCF7;TCF7;TCF7;TCF7;TCF7;TCF7;TCF7	NM_213648;NM_001134852;NM_201632;NM_201633;NM_001134851;NM_201634;NM_001134851;NM_003202;NM_213648;NM_001134852	5'UTR;1stExon;5'UTR;5'UTR;1stExon;5'UTR;5'UTR;Body;1stExon;5'UTR	IL10L10F	0.0907702	0.0176088	0.0344776
cg12016267	chr22	42147356	+	cg12016267		OpenSea	MEI1	NM_152513	Body	TNFR2L10F	-0.163767	0.0177047	0.0346402
cg16531578	chr6	42370098	-	cg16531578		OpenSea	TRERF1;TRERF1	NM_033502;NM_001297573	5'UTR;5'UTR	IL1BL10F	-0.573651	0.017815	0.0348308
cg24331727	chr11	16213327	-	cg24331727		OpenSea	SOX6;SOX6;SOX6;SOX6	NM_001145811;NM_033326;NM_017508;NM_001145819	Body;Body;Body;Body	CRPL10F	0.045377	0.0178691	0.0349113
cg02056986	chr14	105104908	-	cg02056986	chr14:105106461-105106666	N_Shore				IL6L10F	0.0584817	0.0179862	0.0351147
cg01436651	chr18	52029246	-	cg01436651		OpenSea				CRPL10F	-0.0566842	0.0180107	0.0351371
cg10867751	chr1	25870981	-	cg10867751	chr1:25869893-25871042	Island	LDLRAP1	NM_015627	Body	CRPL10F	0.0331378	0.0182423	0.0355633
cg06380030	chr14	65459268	-	cg06380030		OpenSea	FNTB;CHURC1-FNTB;CHURC1-FNTB	NM_002028;NM_001202559;NM_001202558	Body;Body;Body	IL6L10F	-0.143958	0.0182848	0.0356205
cg08010984	chr3	170964901	+	cg08010984		OpenSea	TNIK;TNIK;TNIK;TNIK;TNIK;TNIK;TNIK;TNIK	NM_001161560;NM_015028;NM_001161563;NM_001161562;NM_001161561;NM_001161566;NM_001161565;NM_001161564	Body;Body;Body;Body;Body;Body;Body;Body	IL1raL10F	-0.162091	0.0183639	0.0357231
cg02293874	chr3	124408740	+	cg02293874		OpenSea	KALRN;KALRN	NM_001024660;NM_007064	Body;Body	IL1raL10F	-0.140058	0.0183594	0.0357231
cg26977749	chr7	98477833	+	cg26977749	chr7:98476004-98476954	S_Shore	TRRAP;TRRAP;MIR3609	NM_001244580;NM_003496;NR_037403	5'UTR;5'UTR;TSS1500	TNFR2L10F	0.246784	0.0184682	0.0359
cg08830689	chr6	138062303	+	cg08830689		OpenSea				IL1raL10F	-0.196614	0.0185184	0.0359717
cg17916916	chr17	66286298	+	cg17916916	chr17:66286541-66288532	N_Shore	ARSG;SLC16A6	NM_014960;NM_004694	5'UTR;5'UTR	IL10L10F	0.141791	0.0186148	0.036133
cg05809362	chr17	38699371	+	cg05809362		OpenSea				IL1raL10F	-0.100139	0.018653	0.036174
cg05092891	chr21	37535885	-	cg05092891		OpenSea	DOPEY2	NM_005128	TSS1500	CRPL10F	-0.0749058	0.0186627	0.036174
cg14330293	chr17	1374051	+	cg14330293	chr17:1375216-1375460	N_Shore	MYO1C;MYO1C;MYO1C	NM_001080779;NM_033375;NM_001080950	Body;Body;Body	IL1raL10F	0.117925	0.0187835	0.036356
cg16498856	chr3	141196360	+	cg16498856		OpenSea				IL1raL10F	-0.214029	0.0187712	0.036356
cg12573289	chr7	45075791	+	cg12573289		OpenSea	CCM2;CCM2;CCM2;CCM2;CCM2	NM_031443;NM_001029835;NM_001167935;NM_001167934;NR_030770	Body;Body;Body;Body;Body	IL10L10F	0.0840232	0.0189135	0.0365815
cg03304763	chr11	112037427	+	cg03304763		OpenSea	TEX12	NM_031275	TSS1500	IL1raL10F	-0.211039	0.0191276	0.0369427
cg23305420	chr11	109948734	-	cg23305420		OpenSea				TNFAL10F	-0.348795	0.0191201	0.0369427
cg27218041	chr1	59953216	-	cg27218041		OpenSea	FGGY;FGGY;FGGY;FGGY	NM_018291;NM_001244714;NM_001113411;NR_103473	Body;Body;Body;Body	TNFAL10F	0.179124	0.0192418	0.0371367
cg19163210	chr15	69599744	+	cg19163210		OpenSea	PAQR5	NM_017705	5'UTR	IL1raL10F	0.0689895	0.0193275	0.0372755
cg02228492	chr17	14224797	-	cg02228492		OpenSea	HS3ST3B1	NM_006041	Body	TNFR2L10F	-0.264591	0.0194427	0.0374443
cg23192873	chr7	91809044	+	cg23192873	chr7:91808331-91808632	S_Shore				IL10L10F	0.108093	0.0194353	0.0374443
cg16978321	chr19	5983811	+	cg16978321		OpenSea	LOC100128568	NR_046376	Body	IL1raL10F	-0.19421	0.0194685	0.0374672
cg27206232	chr13	103264306	-	cg27206232		OpenSea	TPP2	NM_003291	Body	TNFAL10F	0.230621	0.0195531	0.0376031
cg12772487	chr20	33145872	-	cg12772487	chr20:33146135-33147318	N_Shore	MAP1LC3A;MAP1LC3A	NM_032514;NM_181509	TSS1500;Body	CRPL10F	0.0418168	0.0196033	0.0376612
cg11226378	chr1	97990981	-	cg11226378		OpenSea	DPYD	NM_000110	Body	IL1BL10F	-0.199874	0.0196251	0.0376612
cg08951566	chr15	38122448	-	cg08951566		OpenSea				TNFAL10F	-0.167245	0.0196148	0.0376612
cg02695372	chr7	106320126	-	cg02695372		OpenSea				IL1raL10F	-0.211717	0.0197599	0.0378931
cg13978081	chr6	116952796	+	cg13978081		OpenSea	RSPH4A;RSPH4A	NM_001161664;NM_001010892	Body;Body	IL1BL10F	0.145124	0.0197983	0.0379398
cg11226378	chr1	97990981	-	cg11226378		OpenSea	DPYD	NM_000110	Body	TNFR2L10F	-0.21348	0.0200536	0.0384017
cg04656009	chr17	32645806	-	cg04656009		OpenSea	CCL8	NM_005623	TSS1500	IL1raL10F	-0.132155	0.0201411	0.0385419
cg22409916	chr7	138426100	+	cg22409916		OpenSea	ATP6V0A4;ATP6V0A4;ATP6V0A4	NM_130841;NM_130840;NM_020632	Body;Body;Body	CRPL10F	-0.0813269	0.020166	0.0385623
cg17562163	chr15	58777264	-	cg17562163		OpenSea	LOC101928694;LIPC	NR_120338;NM_000236	Body;Body	IL1BL10F	-0.159468	0.0202394	0.0386752
cg21457573	chr1	6822395	-	cg21457573		OpenSea				IL6L10F	-0.105862	0.0203491	0.0388574
cg25269438	chr2	26220838	+	cg25269438		OpenSea				IL6L10F	-0.12888	0.0204458	0.0390145
cg26073844	chr8	130799093	+	cg26073844		OpenSea	GSDMC;GSDMC	NM_031415;NM_031415	1stExon;5'UTR	CRPL10F	-0.0519901	0.020518	0.0391246
cg03464923	chr8	96115124	+	cg03464923		OpenSea				TNFR2L10F	-0.242367	0.0205835	0.0392219
cg22506773	chr20	46113164	+	cg22506773		OpenSea				CRPL10F	-0.0517893	0.0206935	0.0394037
cg01297684	chr12	56069634	+	cg01297684		OpenSea				IL1raL10F	-0.369259	0.0207383	0.0394611
cg03856470	chr16	1309414	+	cg03856470	chr16:1309157-1309415	Island				IL10L10F	0.0982802	0.0207679	0.0394897
cg03768345	chr14	103027280	+	cg03768345		OpenSea				IL1raL10F	0.111825	0.0207974	0.0395179
cg17466278	chr20	46391709	-	cg17466278		OpenSea	SULF2;SULF2;SULF2	NM_018837;NM_001161841;NM_198596	5'UTR;5'UTR;5'UTR	IL1raL10F	0.110411	0.0208488	0.039564
cg24418920	chr22	17709899	-	cg24418920		OpenSea				CRPL10F	-0.0775297	0.0208509	0.039564
cg03224013	chr14	106382726	-	cg03224013		OpenSea	KIAA0125	NR_026800	TSS1500	IL10L10F	0.185581	0.0210327	0.039881
cg19579117	chr20	33145866	-	cg19579117	chr20:33146135-33147318	N_Shore	MAP1LC3A;MAP1LC3A	NM_032514;NM_181509	TSS1500;Body	IL6L10F	0.0787993	0.0210843	0.0399507
cg14104280	chr10	82363213	-	cg14104280		OpenSea	SH2D4B;SH2D4B	NM_207372;NM_001145719	Body;Body	IL1raL10F	-0.218155	0.0211131	0.0399774
cg07411165	chr4	146761480	-	cg07411165		OpenSea	ZNF827	NM_178835	Body	IL1raL10F	-0.166224	0.0214141	0.0405189
cg27057432	chr6	5619983	-	cg27057432		OpenSea	FARS2	NM_006567	Body	IL6L10F	-0.0865341	0.0215184	0.0406876
cg09659000	chr1	13820748	+	cg09659000		OpenSea	LRRC38	NM_001010847	Body	CRPL10F	0.128147	0.0215482	0.0407156
cg13673960	chr4	1742301	+	cg13673960		OpenSea	TACC3	NM_006342	Body	IL1BL10F	0.177259	0.0217305	0.0410312
cg14104280	chr10	82363213	-	cg14104280		OpenSea	SH2D4B;SH2D4B	NM_207372;NM_001145719	Body;Body	TNFAL10F	-0.307783	0.02183	0.0411903
cg05422993	chr19	46526863	+	cg05422993	chr19:46526046-46526334	S_Shore	PGLYRP1	NM_005091	TSS1500	IL1raL10F	-0.169081	0.0218938	0.041282
cg04501408	chr5	141551033	-	cg04501408		OpenSea				CRPL10F	-0.0551315	0.0219943	0.0414426
cg04331199	chr1	67227248	+	cg04331199		OpenSea	TCTEX1D1	NM_152665	Body	IL1raL10F	-0.188508	0.0220399	0.0414995
cg21088514	chr21	35884376	-	cg21088514		OpenSea	KCNE1	NM_000219	TSS1500	IL1raL10F	-0.122967	0.0222192	0.0418081
cg08868697	chr20	52750124	-	cg08868697		OpenSea				TNFAL10F	0.298429	0.0222503	0.0418083
cg24835232	chr6	24165957	-	cg24835232		OpenSea				IL6L10F	-0.0837328	0.022239	0.0418083
cg12242258	chr21	35884230	-	cg12242258		OpenSea	KCNE1;KCNE1;KCNE1;KCNE1	NM_001270403;NM_001270404;NM_001270402;NM_000219	TSS1500;TSS1500;TSS1500;5'UTR	IL10L10F	-0.163684	0.0224022	0.0420645
cg26543033	chr7	150056200	-	cg26543033		OpenSea				IL6L10F	-0.0839251	0.022573	0.0423557
cg19082218	chr2	8815947	-	cg19082218	chr2:8816314-8817264	N_Shore	ID2-AS1	NR_110154	Body	IL1raL10F	-0.172656	0.0226859	0.042538
cg07688032	chr19	2330963	+	cg07688032	chr19:2328364-2329089	S_Shore	SPPL2B;SPPL2B	NM_001077238;NM_152988	Body;Body	IL1raL10F	0.0965541	0.022759	0.0426454
cg07138962	chr14	100035588	+	cg07138962		OpenSea	CCDC85C	NM_001144995	Body	TNFAL10F	0.182308	0.0230135	0.0430627
cg06750745	chr4	184181896	-	cg06750745		OpenSea	WWC2	NM_024949	Body	TNFAL10F	-0.213715	0.0230036	0.0430627
cg05696969	chr5	145326228	-	cg05696969		OpenSea	SH3RF2	NM_152550	Body	TNFAL10F	-0.323332	0.0233111	0.0435645
cg17230773	chr7	142494148	+	cg17230773	chr7:142494563-142495248	N_Shore				CRPL10F	0.0489084	0.0233301	0.0435645
cg16321048	chr14	104605295	-	cg16321048	chr14:104601959-104605672	Island	KIF26A	NM_015656	Body	IL10L10F	0.168845	0.0233168	0.0435645
cg19579117	chr20	33145866	-	cg19579117	chr20:33146135-33147318	N_Shore	MAP1LC3A;MAP1LC3A	NM_032514;NM_181509	TSS1500;Body	IL10L10F	0.126671	0.0234146	0.0436922
cg17668435	chr3	171866136	+	cg17668435		OpenSea	FNDC3B;FNDC3B	NM_022763;NM_001135095	Body;Body	IL10L10F	-0.13205	0.0234809	0.0437857
cg23879831	chr10	115478900	+	cg23879831		OpenSea	CASP7;CASP7;CASP7;CASP7;CASP7;CASP7;CASP7	NM_001267057;NM_033338;NM_033340;NM_001227;NM_001267056;NM_033339;NM_001267058	Body;Body;Body;Body;Body;Body;Body	TNFR2L10F	-0.165304	0.0236759	0.0441189
cg01271695	chr2	1719323	-	cg01271695		OpenSea	PXDN	NM_012293	Body	IL1BL10F	0.175696	0.0238533	0.0444187
cg13304206	chr4	40562130	+	cg13304206		OpenSea	RBM47	NM_001098634	5'UTR	IL1raL10F	-0.195464	0.0238801	0.0444381
cg17155829	chr19	7413575	-	cg17155829		OpenSea				IL1raL10F	-0.160883	0.0244011	0.0453763
cg02293874	chr3	124408740	+	cg02293874		OpenSea	KALRN;KALRN	NM_001024660;NM_007064	Body;Body	IL10L10F	-0.160939	0.0244276	0.0453943
cg04415310	chr12	124743637	+	cg04415310		OpenSea	ZNF664-FAM101A	NM_001204299	5'UTR	IL1BL10F	0.37547	0.0245575	0.0456044
cg08040689	chr10	88124374	-	cg08040689	chr10:88122924-88127364	Island	GRID1	NM_017551	Body	IL10L10F	0.106906	0.0246075	0.0456658
cg18185662	chr11	42275722	+	cg18185662		OpenSea	LOC100507205	NR_038309	TSS1500	IL1raL10F	-0.135115	0.0246872	0.0457822
cg18363226	chr7	132741882	+	cg18363226		OpenSea	CHCHD3	NM_017812	Body	IL1BL10F	-0.239729	0.0248712	0.0460918
cg24687529	chr1	117529954	+	cg24687529		OpenSea	PTGFRN	NM_020440	3'UTR	IL1BL10F	0.230131	0.0249118	0.0461354
cg26605900	chr17	72614843	-	cg26605900		OpenSea	CD300E	NM_181449	Body	IL1BL10F	0.131973	0.0251327	0.0465127
cg13990362	chr4	117474275	-	cg13990362		OpenSea				IL6L10F	-0.090574	0.0253219	0.0468308
cg11104177	chr10	123605117	-	cg11104177		OpenSea	ATE1;ATE1;ATE1;ATE1;ATE1;ATE1	NR_110006;NM_001288734;NM_001288735;NM_007041;NM_001001976;NM_001288736	Body;Body;Body;Body;Body;Body	IL1BL10F	-0.41879	0.0254351	0.047008
cg20703242	chr1	230279135	+	cg20703242		OpenSea	GALNT2	NM_004481	Body	IL1BL10F	0.136845	0.025589	0.0472601
cg15818109	chr6	33142006	-	cg15818109		OpenSea	COL11A2;COL11A2;COL11A2	NM_080679;NM_080681;NM_080680	Body;Body;Body	TNFR2L10F	0.17057	0.0257574	0.0475062
cg24796548	chr10	108785434	+	cg24796548		OpenSea	SORCS1;SORCS1;SORCS1;SORCS1;SORCS1;SORCS1	NM_001013031;NM_001206570;NM_052918;NM_001206572;NM_001206569;NM_001206571	Body;Body;Body;Body;Body;Body	IL1raL10F	-0.158559	0.0257569	0.0475062
cg03856470	chr16	1309414	+	cg03856470	chr16:1309157-1309415	Island				IL1raL10F	0.081049	0.0260813	0.048038
cg26456810	chr17	42002103	+	cg26456810		OpenSea				TNFAL10F	-0.110071	0.0260733	0.048038
cg18330082	chr10	134983749	+	cg18330082	chr10:134980302-134981059	S_Shelf	KNDC1	NM_152643	Body	IL6L10F	0.111312	0.0263466	0.0484935
cg07411165	chr4	146761480	-	cg07411165		OpenSea	ZNF827	NM_178835	Body	IL10L10F	-0.20048	0.0263841	0.0485295
cg08663999	chr3	150089701	-	cg08663999		OpenSea				TNFAL10F	-0.239536	0.0265247	0.0487218
cg08880154	chr1	86926798	-	cg08880154		OpenSea				TNFAL10F	-0.123455	0.0265113	0.0487218
cg08001199	chr2	65058570	+	cg08001199		OpenSea				TNFAL10F	-0.299796	0.0267235	0.0490535
cg24296397	chr3	49692537	+	cg24296397	chr3:49690022-49690329	S_Shelf	BSN	NM_003458	Body	IL10L10F	0.131131	0.0270681	0.0496525
