# Supplementary material for: DNA methylation profiles of cancer-related fatigue associated with markers of inflammation and immunometabolism
Source: Research Square preprint supplement (doi:10.21203/rs.3.rs-3332488/v1), 2023-09-28
Supplement: Supplementary file 4 [file b1281af2a2e6ca8dc8b5d612.xlsx]

## Sheet: Sheet 1 - Supplemental Table 1 
Supplemental Table 1 CpG fatigue FINAL
chr	pos	strand	Name	Islands_Name	Relation_to_Island	UCSC_RefGene_Name	UCSC_RefGene_Accession	UCSC_RefGene_Group	cpg	beta	pv	fdr
chr21	35884348	-	cg01183122		OpenSea	KCNE1	NM_000219	TSS1500	cg01183122	-0.00512096	1.59e-09	0.000669201
chr11	48151361	+	cg05165365		OpenSea	PTPRJ;PTPRJ	NM_001098503;NM_002843	Body;Body	cg05165365	-0.00585889	2.46e-09	0.000669201
chr5	67730071	-	cg06433467		OpenSea				cg06433467	-0.00976411	2.49e-09	0.000669201
chr7	132741882	+	cg18363226		OpenSea	CHCHD3	NM_017812	Body	cg18363226	-0.00623816	9.68e-09	0.00192139
chr8	142167457	-	cg16971621		OpenSea	DENND3	NM_014957	Body	cg16971621	-0.00465644	1.19e-08	0.00192139
chr19	2330963	+	cg07688032	chr19:2328364-2329089	S_Shore	SPPL2B;SPPL2B	NM_001077238;NM_152988	Body;Body	cg07688032	0.00325384	1.57e-08	0.00211639
chr12	122294017	+	cg10597669		OpenSea	HPD;HPD	NM_001171993;NM_002150	Body;Body	cg10597669	-0.00293872	3.36e-08	0.00387326
chr1	201487263	+	cg19225696		OpenSea				cg19225696	-0.00608336	4.23e-08	0.00427107
chr1	16644480	+	cg05773425		OpenSea	FBXO42	NM_018994	5'UTR	cg05773425	0.00737212	6e-08	0.00502401
chr3	101901234	+	cg12992827		OpenSea				cg12992827	-0.00847745	6.22e-08	0.00502401
chr14	106376379	-	cg24272019		OpenSea				cg24272019	0.00542417	7.28e-08	0.0053435
chr2	85933069	+	cg19805943		OpenSea				cg19805943	-0.00498868	8.84e-08	0.00544443
chr17	15845440	-	cg06019998	chr17:15847757-15849513	N_Shelf				cg06019998	-0.0102797	9.57e-08	0.00544443
chr20	49063114	+	cg09293881		OpenSea				cg09293881	-0.0043258	9.8e-08	0.00544443
chr7	44677772	+	cg18442362		OpenSea	OGDH;OGDH;OGDH	NM_001003941;NM_001165036;NM_002541	Body;Body;Body	cg18442362	-0.00686742	1.01e-07	0.00544443
chr3	170964901	+	cg08010984		OpenSea	TNIK;TNIK;TNIK;TNIK;TNIK;TNIK;TNIK;TNIK	NM_001161560;NM_015028;NM_001161563;NM_001161562;NM_001161561;NM_001161566;NM_001161565;NM_001161564	Body;Body;Body;Body;Body;Body;Body;Body	cg08010984	-0.00460766	1.09e-07	0.00547688
chr9	124083087	+	cg06648398		OpenSea	GSN;GSN;GSN;GSN;GSN;GSN;GSN;GSN;GSN;GSN	NM_001127663;NM_001258029;NM_001258030;NM_000177;NM_001127667;NM_001127666;NM_198252;NM_001127664;NM_001127662;NM_001127665	Body;Body;Body;Body;Body;Body;Body;Body;Body;Body	cg06648398	-0.00408425	1.23e-07	0.00585062
chr10	121418050	-	cg17076667		OpenSea	BAG3	NM_004281	Body	cg17076667	-0.00476917	1.42e-07	0.00638772
chr21	43221841	+	cg08381918	chr21:43221474-43221842	Island	PRDM15;PRDM15	NM_022115;NM_001040424	Body;Body	cg08381918	0.00307356	1.92e-07	0.00813515
chr11	65618874	-	cg04231870		OpenSea	SNX32;SNX32	NM_152760;NM_152760	ExonBnd;Body	cg04231870	-0.00511268	2.1e-07	0.00844724
chr9	134882463	-	cg16669300		OpenSea	MED27;MED27	NM_004269;NM_001253881	Body;Body	cg16669300	-0.00615008	2.2e-07	0.00844724
chr4	40562130	+	cg13304206		OpenSea	RBM47	NM_001098634	5'UTR	cg13304206	-0.00619887	2.37e-07	0.0086938
chr16	30108259	-	cg19822755	chr16:30107511-30107875	S_Shore	YPEL3;YPEL3	NM_031477;NM_001145524	TSS1500;TSS1500	cg19822755	0.00616107	2.68e-07	0.00918002
chr16	90077571	-	cg09029633		OpenSea	DBNDD1;DBNDD1;DBNDD1;DBNDD1	NM_001288708;NM_024043;NM_001042610;NM_001288709	Body;TSS1500;Body;Body	cg09029633	0.00383843	2.73e-07	0.00918002
chr6	160227462	+	cg10724186		OpenSea	PNLDC1;PNLDC1	NM_001271862;NM_173516	Body;Body	cg10724186	-0.00710957	2.89e-07	0.00932378
chr12	93367516	+	cg25082943		OpenSea				cg25082943	-0.00532779	3.06e-07	0.00950257
chr1	185374534	+	cg24854225		OpenSea				cg24854225	-0.00676837	3.52e-07	0.0105137
chr11	112037427	+	cg03304763		OpenSea	TEX12	NM_031275	TSS1500	cg03304763	-0.00635026	3.69e-07	0.0106335
chr1	65924844	+	cg11807188		OpenSea	LEPR;LEPR;LEPR	NM_001003680;NM_001003679;NM_002303	5'UTR;5'UTR;5'UTR	cg11807188	-0.00284795	4.29e-07	0.0119283
chr10	49540488	-	cg24023352		OpenSea	MAPK8	NM_001278547	5'UTR	cg24023352	-0.00958651	4.82e-07	0.0129742
chr17	72614843	-	cg26605900		OpenSea	CD300E	NM_181449	Body	cg26605900	0.00311614	5.03e-07	0.0130857
chr3	45706990	+	cg10351852		OpenSea	LIMD1	NM_014240	Body	cg10351852	0.00343511	5.34e-07	0.0132087
chr2	145172035	-	cg20995564		OpenSea	ZEB2;ZEB2	NM_014795;NM_001171653	Body;Body	cg20995564	-0.0128887	5.4e-07	0.0132087
chr16	28161100	-	cg03307560		OpenSea	XPO6;XPO6	NM_001270940;NM_015171	Body;Body	cg03307560	-0.00636917	6.06e-07	0.0140163
chr7	155150793	+	cg06963709		OpenSea				cg06963709	-0.0064415	6.08e-07	0.0140163
chr4	40814531	-	cg08350742		OpenSea	APBB2;APBB2;APBB2;APBB2;APBB2;APBB2;APBB2	NM_001166054;NM_001166053;NM_173075;NM_001166050;NM_004307;NM_001166052;NM_001166051	3'UTR;3'UTR;3'UTR;3'UTR;3'UTR;3'UTR;3'UTR	cg08350742	-0.00671557	6.35e-07	0.0140174
chr12	124743637	+	cg04415310		OpenSea	ZNF664-FAM101A	NM_001204299	5'UTR	cg04415310	0.00769899	6.45e-07	0.0140174
chr17	73577422	+	cg04070976		OpenSea				cg04070976	0.00392991	6.6e-07	0.0140174
chr5	145326228	-	cg05696969		OpenSea	SH3RF2	NM_152550	Body	cg05696969	-0.00666701	6.8e-07	0.0140795
chr6	138062303	+	cg08830689		OpenSea				cg08830689	-0.00597451	7.62e-07	0.015367
chr6	5619983	-	cg27057432		OpenSea	FARS2	NM_006567	Body	cg27057432	-0.00352905	7.96e-07	0.0156701
chr20	48675540	+	cg00568296		OpenSea				cg00568296	0.00364402	8.6e-07	0.0162447
chr13	22111377	-	cg20179730		OpenSea	MICU2	NM_152726	Body	cg20179730	-0.00625682	8.65e-07	0.0162447
chr9	93937280	+	cg24342987		OpenSea				cg24342987	-0.0100187	9.06e-07	0.0163022
chr2	1719323	-	cg01271695		OpenSea	PXDN	NM_012293	Body	cg01271695	0.00402696	9.19e-07	0.0163022
chr14	106382755	+	cg02940661		OpenSea	KIAA0125	NR_026800	TSS1500	cg02940661	0.00394424	9.64e-07	0.0163022
chr20	33145872	-	cg12772487	chr20:33146135-33147318	N_Shore	MAP1LC3A;MAP1LC3A	NM_032514;NM_181509	TSS1500;Body	cg12772487	0.00286685	9.66e-07	0.0163022
chr10	63751843	+	cg26416615		OpenSea	ARID5B	NM_032199	Body	cg26416615	-0.00768497	9.82e-07	0.0163022
chr14	100035588	+	cg07138962		OpenSea	CCDC85C	NM_001144995	Body	cg07138962	0.00368923	9.9e-07	0.0163022
chr9	92331809	-	cg24522373		OpenSea	UNQ6494	NR_024280	Body	cg24522373	0.00487424	1.03e-06	0.016628
chr17	76037239	+	cg04268643	chr17:76037074-76037323	Island	TNRC6C;TNRC6C	NM_018996;NM_001142640	5'UTR;5'UTR	cg04268643	0.00303429	1.22e-06	0.0190803
chr2	25473529	-	cg15150970	chr2:25474757-25475598	N_Shore	DNMT3A;DNMT3A;DNMT3A	NM_022552;NM_175629;NM_153759	Body;Body;Body	cg15150970	0.00224955	1.23e-06	0.0190803
chr1	67227248	+	cg04331199		OpenSea	TCTEX1D1	NM_152665	Body	cg04331199	-0.00564886	1.26e-06	0.0192547
chr12	109023799	-	cg00159243		OpenSea	SELPLG	NM_003006	5'UTR	cg00159243	-0.00416669	1.41e-06	0.0199097
chr9	126908822	-	cg08714061		OpenSea				cg08714061	-0.00586982	1.41e-06	0.0199097
chr17	62274272	+	cg16713588		OpenSea	TEX2;TEX2;TEX2	NM_001288733;NM_001288732;NM_018469	Body;Body;Body	cg16713588	-0.00419415	1.41e-06	0.0199097
chr13	27580970	+	cg24415799		OpenSea				cg24415799	0.00502325	1.44e-06	0.0199097
chr1	62729617	+	cg16648387		OpenSea	KANK4	NM_181712	Body	cg16648387	-0.00675241	1.45e-06	0.0199097
chr8	48556968	-	cg10545338		OpenSea	SPIDR;SPIDR;SPIDR;SPIDR	NR_104581;NM_001080394;NM_001282916;NM_001282919	Body;Body;Body;Body	cg10545338	-0.00396697	1.46e-06	0.0199097
chr5	14583002	-	cg05708963	chr5:14581497-14582569	S_Shore	FAM105A	NM_019018	Body	cg05708963	0.00379718	1.52e-06	0.0204617
chr3	55002054	-	cg26859083		OpenSea	LRTM1;CACNA2D3	NM_001304389;NM_018398	TSS1500;Body	cg26859083	0.00477248	1.61e-06	0.0213165
chr22	22762784	-	cg18710674		OpenSea				cg18710674	-0.00285593	1.75e-06	0.0226541
chr21	35884376	-	cg21088514		OpenSea	KCNE1	NM_000219	TSS1500	cg21088514	-0.00352315	1.77e-06	0.0226541
chr18	52490607	-	cg26010546		OpenSea				cg26010546	-0.00546198	1.87e-06	0.0235474
chr4	110001222	-	cg09902898		OpenSea	COL25A1;COL25A1;COL25A1;COL25A1	NR_045756;NM_198721;NM_001256074;NM_032518	Body;Body;Body;Body	cg09902898	-0.00617129	1.93e-06	0.0240139
chr17	1374051	+	cg14330293	chr17:1375216-1375460	N_Shore	MYO1C;MYO1C;MYO1C	NM_001080779;NM_033375;NM_001080950	Body;Body;Body	cg14330293	0.00320291	1.98e-06	0.0240139
chr7	30329949	+	cg11642336		OpenSea	MIR550B1;ZNRF2	NR_037513;NM_147128	TSS1500;Body	cg11642336	-0.0046006	2.01e-06	0.0240139
chr11	121411582	+	cg13163786		OpenSea	SORL1	NM_003105	Body	cg13163786	-0.00696857	2.02e-06	0.0240139
chr20	46391709	-	cg17466278		OpenSea	SULF2;SULF2;SULF2	NM_018837;NM_001161841;NM_198596	5'UTR;5'UTR;5'UTR	cg17466278	0.00326868	2.08e-06	0.0241339
chr19	7413575	-	cg17155829		OpenSea				cg17155829	-0.00444993	2.09e-06	0.0241339
chr1	151945663	-	cg27310092		OpenSea				cg27310092	-0.00606415	2.14e-06	0.0242088
chr1	159047177	-	cg24145401		OpenSea	AIM2	NM_004833	TSS1500	cg24145401	-0.00949968	2.22e-06	0.0242088
chr17	14224797	-	cg02228492		OpenSea	HS3ST3B1	NM_006041	Body	cg02228492	-0.00476213	2.23e-06	0.0242088
chr1	159046973	+	cg10636246		OpenSea	AIM2	NM_004833	TSS1500	cg10636246	-0.0091473	2.24e-06	0.0242088
chr8	9045074	+	cg13659875		OpenSea	LOC101929128	NR_125431	TSS1500	cg13659875	-0.00234563	2.25e-06	0.0242088
chr6	158663595	-	cg07388661		OpenSea				cg07388661	-0.00473693	2.32e-06	0.0243811
chr17	32645806	-	cg04656009		OpenSea	CCL8	NM_005623	TSS1500	cg04656009	-0.0038406	2.33e-06	0.0243811
chr15	55572079	+	cg02392359		OpenSea	RAB27A	NM_183235	5'UTR	cg02392359	-0.00704909	2.36e-06	0.0243811
chr18	8963235	+	cg12602010		OpenSea				cg12602010	-0.00519189	2.4e-06	0.0243811
chr7	157618302	-	cg20733017	chr7:157618856-157619302	N_Shore	PTPRN2;PTPRN2;PTPRN2;PTPRN2;PTPRN2	NM_001308268;NM_002847;NM_130843;NM_130842;NM_001308267	Body;Body;Body;Body;Body	cg20733017	0.00304375	2.42e-06	0.0243811
chr12	93531972	-	cg22895728		OpenSea	LOC643339	NR_040096	Body	cg22895728	-0.00502404	2.45e-06	0.0243811
chr3	129636326	+	cg14216476		OpenSea				cg14216476	0.00639621	2.5e-06	0.024559
chr14	55574999	-	cg02300329		OpenSea				cg02300329	-0.0038318	2.59e-06	0.0251533
chr6	31088366	+	cg00457165		OpenSea	CDSN;PSORS1C1	NM_001264;NM_014068	TSS200;5'UTR	cg00457165	0.00349761	2.69e-06	0.0252029
chr6	116952796	+	cg13978081		OpenSea	RSPH4A;RSPH4A	NM_001161664;NM_001010892	Body;Body	cg13978081	0.00305938	2.69e-06	0.0252029
chr19	6038846	-	cg04512965	chr19:6039990-6040228	N_Shore	RFX2;RFX2	NM_000635;NM_134433	Body;Body	cg04512965	-0.00331249	2.75e-06	0.0252029
chr12	107799002	-	cg25488374		OpenSea	BTBD11	NM_001018072	Body	cg25488374	-0.00495157	2.77e-06	0.0252029
chr1	111743368	+	cg00619207	chr1:111746337-111747303	N_Shelf	DENND2D	NM_024901	TSS200	cg00619207	-0.00384096	2.82e-06	0.0252029
chr4	184181896	-	cg06750745		OpenSea	WWC2	NM_024949	Body	cg06750745	-0.00430295	2.82e-06	0.0252029
chr4	185748534	-	cg24521685	chr4:185746557-185747827	S_Shore	ACSL1;ACSL1	NM_001286711;NM_001995	TSS1500;TSS1500	cg24521685	-0.00349145	2.86e-06	0.0252029
chr22	42147356	+	cg12016267		OpenSea	MEI1	NM_152513	Body	cg12016267	-0.00313355	2.89e-06	0.0252029
chr7	142494148	+	cg17230773	chr7:142494563-142495248	N_Shore				cg17230773	0.003835	2.93e-06	0.0252029
chr11	111956362	-	cg14839898	chr11:111957352-111957681	N_Shore	TIMM8B;SDHD;TIMM8B	NM_012459;NM_003002;NR_028383	Body;TSS1500;Body	cg14839898	-0.0051172	2.97e-06	0.0252029
chr6	44202699	-	cg04903159	chr6:44205686-44205931	N_Shelf				cg04903159	0.0029781	3e-06	0.0252029
chr4	86728891	-	cg06426077		OpenSea	ARHGAP24;ARHGAP24	NM_001025616;NM_001042669	Body;5'UTR	cg06426077	-0.00360097	3.01e-06	0.0252029
chr5	142936868	-	cg23484741		OpenSea				cg23484741	-0.00384325	3.03e-06	0.0252029
chr10	125960385	+	cg03337382		OpenSea				cg03337382	-0.00478073	3.03e-06	0.0252029
chr17	76595619	+	cg10027857		OpenSea				cg10027857	-0.00380248	3.13e-06	0.0252029
chr4	146761480	-	cg07411165		OpenSea	ZNF827	NM_178835	Body	cg07411165	-0.00508931	3.15e-06	0.0252029
chr3	49692537	+	cg24296397	chr3:49690022-49690329	S_Shelf	BSN	NM_003458	Body	cg24296397	0.00320465	3.15e-06	0.0252029
chr1	10528093	-	cg01795822		OpenSea	DFFA;DFFA	NM_004401;NM_213566	Body;Body	cg01795822	0.00488209	3.16e-06	0.0252029
chr12	56069634	+	cg01297684		OpenSea				cg01297684	-0.0102035	3.19e-06	0.0252029
chr10	4093714	-	cg08506528		OpenSea	LOC101927964	NR_120632	TSS1500	cg08506528	-0.00503253	3.22e-06	0.0252029
chr7	133196253	+	cg23635525		OpenSea	EXOC4	NM_021807	Body	cg23635525	-0.00602907	3.32e-06	0.0257716
chr15	93570953	+	cg12644285		OpenSea	CHD2	NM_001271	3'UTR	cg12644285	-0.00422703	3.4e-06	0.0258397
chr2	174023580	-	cg13178755		OpenSea	ZAK;ZAK	NM_133646;NM_016653	Body;Body	cg13178755	-0.00773207	3.42e-06	0.0258397
chr8	140986869	+	cg19475961		OpenSea	TRAPPC9;TRAPPC9	NM_001160372;NM_031466	Body;Body	cg19475961	-0.00363575	3.43e-06	0.0258397
chr3	150089701	-	cg08663999		OpenSea				cg08663999	-0.00474472	3.5e-06	0.0259149
chr14	21317205	-	cg05866150		OpenSea				cg05866150	-0.00494201	3.51e-06	0.0259149
chr22	45624479	-	cg16961793		OpenSea	KIAA0930	NM_001009880	Body	cg16961793	-0.00516464	3.53e-06	0.0259149
chr7	130646051	+	cg20228731		OpenSea	FLJ43663;FLJ43663	NR_015431;NR_024153	Body;Body	cg20228731	-0.0159605	3.6e-06	0.0259564
chr14	57050624	+	cg13538554	chr14:57046472-57046804	S_Shelf	TMEM260	NM_017799	Body	cg13538554	-0.00539056	3.6e-06	0.0259564
chr11	5462320	+	cg12839166		OpenSea	OR51I1;OR51B5;OR51B5	NM_001005288;NR_038321;NM_001005567	1stExon;Body;5'UTR	cg12839166	0.00381116	3.85e-06	0.0274019
chr1	45267159	+	cg26615736	chr1:45265534-45266783	S_Shore	PLK3	NM_004073	Body	cg26615736	-0.00349377	3.88e-06	0.0274019
chr11	42275722	+	cg18185662		OpenSea	LOC100507205	NR_038309	TSS1500	cg18185662	-0.00391586	3.9e-06	0.0274019
chr19	12890029	-	cg19821297	chr19:12889083-12889343	S_Shore				cg19821297	-0.00437845	3.99e-06	0.0277655
chr2	169888032	-	cg12955870		OpenSea	ABCB11	NM_003742	TSS200	cg12955870	-0.00411915	4.03e-06	0.0277976
chr4	1742301	+	cg13673960		OpenSea	TACC3	NM_006342	Body	cg13673960	0.00366005	4.1e-06	0.0279661
chr15	90727783	+	cg26312071	chr15:90727879-90728570	N_Shore	SEMA4B	NM_020210	TSS1500	cg26312071	-0.00432935	4.12e-06	0.0279661
chr17	54994023	+	cg15033511	chr17:54990832-54991771	S_Shelf				cg15033511	-0.0030406	4.16e-06	0.0280058
chr7	158611626	+	cg12800932		OpenSea	ESYT2	NM_020728	Body	cg12800932	-0.0101158	4.3e-06	0.0286358
chr6	42370098	-	cg16531578		OpenSea	TRERF1;TRERF1	NM_033502;NM_001297573	5'UTR;5'UTR	cg16531578	-0.0106252	4.33e-06	0.0286358
chr18	76916901	-	cg09304470		OpenSea	ATP9B;ATP9B	NM_198531;NM_001306085	Body;Body	cg09304470	-0.00635	4.38e-06	0.0287452
chr3	14382884	+	cg24672565		OpenSea				cg24672565	0.00370449	4.44e-06	0.0289106
chr3	9176211	-	cg01177100	chr3:9177691-9178189	N_Shore	SRGAP3;SRGAP3	NM_001033117;NM_014850	Body;Body	cg01177100	0.00275626	4.57e-06	0.0293996
chr4	38525620	+	cg11993828		OpenSea	LINC01258	NR_110951	TSS1500	cg11993828	-0.00647587	4.59e-06	0.0293996
chr2	29174857	-	cg18789123		OpenSea				cg18789123	-0.00596086	4.73e-06	0.0297428
chr11	34426751	+	cg16218494		OpenSea				cg16218494	-0.00649543	4.78e-06	0.0297428
chr7	45196400	+	cg17539824	chr7:45197181-45197807	N_Shore	RAMP3	NM_005856	TSS1500	cg17539824	-0.00332046	4.8e-06	0.0297428
chr16	50718807	-	cg18850465		OpenSea				cg18850465	-0.00241081	4.82e-06	0.0297428
chr1	25870981	-	cg10867751	chr1:25869893-25871042	Island	LDLRAP1	NM_015627	Body	cg10867751	0.00210451	4.84e-06	0.0297428
chr15	39636986	+	cg14712766		OpenSea				cg14712766	-0.00629712	4.89e-06	0.0297428
chr10	330411	+	cg18170385		OpenSea	DIP2C	NM_014974	Body	cg18170385	-0.00376063	4.9e-06	0.0297428
chr5	6638536	+	cg17774776		OpenSea	SRD5A1	NM_001047	Body	cg17774776	-0.00557421	5.12e-06	0.0308334
chr22	43163057	+	cg05333174	chr22:43165947-43166287	N_Shelf				cg05333174	0.00637937	5.27e-06	0.0315287
chr6	139794538	-	cg14887853		OpenSea	LOC645434	NR_033919	Body	cg14887853	-0.00773632	5.32e-06	0.0315441
chr9	140067121	+	cg04621850	chr9:140068792-140069082	N_Shore	TMEM210	NM_001282477	TSS1500	cg04621850	0.00459591	5.35e-06	0.0315441
chr16	51184392	+	cg00582524	chr16:51183699-51188763	Island	SALL1;SALL1;SALL1	NM_002968;NM_001127892;NM_001127892	Body;5'UTR;1stExon	cg00582524	0.00941321	5.48e-06	0.0319139
chr6	110094128	+	cg14185504		OpenSea	FIG4	NM_014845	Body	cg14185504	-0.00289644	5.5e-06	0.0319139
chr14	89626932	-	cg16384774	chr14:89628885-89629199	N_Shore	FOXN3;FOXN3	NM_005197;NM_001085471	3'UTR;3'UTR	cg16384774	-0.00398072	5.54e-06	0.0319607
chr18	22494802	+	cg26089920		OpenSea				cg26089920	-0.00222864	5.8e-06	0.0331717
chr10	123605117	-	cg11104177		OpenSea	ATE1;ATE1;ATE1;ATE1;ATE1;ATE1	NR_110006;NM_001288734;NM_001288735;NM_007041;NM_001001976;NM_001288736	Body;Body;Body;Body;Body;Body	cg11104177	-0.00852321	5.89e-06	0.03333
chr14	106385381	-	cg19136485		OpenSea	KIAA0125	NR_026800	Body	cg19136485	0.00434221	5.92e-06	0.03333
chr20	52750124	-	cg08868697		OpenSea				cg08868697	0.0060191	5.95e-06	0.03333
chr11	16213327	-	cg24331727		OpenSea	SOX6;SOX6;SOX6;SOX6	NM_001145811;NM_033326;NM_017508;NM_001145819	Body;Body;Body;Body	cg24331727	0.0028551	6.03e-06	0.0335435
chr1	86926798	-	cg08880154		OpenSea				cg08880154	-0.00251624	6.11e-06	0.0337727
chr17	68165759	-	cg25724441	chr17:68164913-68165720	S_Shore	KCNJ2;KCNJ2	NM_000891;NM_000891	5'UTR;1stExon	cg25724441	0.00363988	6.29e-06	0.0345189
chr11	117280371	+	cg25746149		OpenSea	CEP164;CEP164	NM_001271933;NM_014956	Body;Body	cg25746149	-0.00629183	6.44e-06	0.0351092
chr19	13056058	-	cg12847371	chr19:13056458-13057125	N_Shore	RAD23A;RAD23A;RAD23A;RAD23A	NM_001270363;NM_001270362;NM_005053;NR_072976	TSS1500;TSS1500;TSS1500;TSS1500	cg12847371	-0.00474726	6.55e-06	0.0351476
chr4	26206130	-	cg11604811		OpenSea				cg11604811	-0.00606296	6.6e-06	0.0351476
chr15	91499023	-	cg15341132	chr15:91497994-91498615	S_Shore	RCCD1;RCCD1;RCCD1	NM_033544;NM_001017919;NM_033544	5'UTR;5'UTR;ExonBnd	cg15341132	-0.00320346	6.62e-06	0.0351476
chr14	103027280	+	cg03768345		OpenSea				cg03768345	0.0032395	6.69e-06	0.0351476
chr21	35884230	-	cg12242258		OpenSea	KCNE1;KCNE1;KCNE1;KCNE1	NM_001270403;NM_001270404;NM_001270402;NM_000219	TSS1500;TSS1500;TSS1500;5'UTR	cg12242258	-0.00361785	6.7e-06	0.0351476
chr2	103335661	+	cg21186405		OpenSea	MFSD9	NM_032718	Body	cg21186405	-0.00588526	6.71e-06	0.0351476
chr8	1725179	+	cg19198358		OpenSea	CLN8	NM_018941	Body	cg19198358	-0.00246659	6.83e-06	0.0355633
chr10	88124374	-	cg08040689	chr10:88122924-88127364	Island	GRID1	NM_017551	Body	cg08040689	0.00262906	6.89e-06	0.0355633
chr1	115091976	+	cg21069139		OpenSea				cg21069139	-0.00409387	6.99e-06	0.0355633
chr7	98477833	+	cg26977749	chr7:98476004-98476954	S_Shore	TRRAP;TRRAP;MIR3609	NM_001244580;NM_003496;NR_037403	5'UTR;5'UTR;TSS1500	cg26977749	0.00440305	7.01e-06	0.0355633
chr3	160653423	+	cg04364800		OpenSea	PPM1L	NM_139245	Body	cg04364800	-0.00306934	7.04e-06	0.0355633
chr19	17976717	-	cg02158894		OpenSea				cg02158894	-0.00335494	7.05e-06	0.0355633
chr7	65818685	+	cg15932350		OpenSea	TPST1	NM_003596	Body	cg15932350	-0.00304645	7.13e-06	0.0357538
chr12	9861036	-	cg08917665		OpenSea				cg08917665	-0.00408018	7.22e-06	0.0359874
chr13	76033339	-	cg16419027		OpenSea	TBC1D4;TBC1D4;TBC1D4	NM_014832;NM_001286658;NM_001286659	Body;Body;Body	cg16419027	-0.00369486	7.63e-06	0.0377911
chr2	10470123	+	cg18616925		OpenSea	HPCAL1;HPCAL1;HPCAL1	NM_001258357;NM_002149;NM_134421	TSS200;5'UTR;5'UTR	cg18616925	0.00547531	7.81e-06	0.038426
chr20	42543034	+	cg00789528	chr20:42543097-42545137	N_Shore	TOX2	NM_001098797	TSS1500	cg00789528	0.00279985	7.95e-06	0.0384903
chr3	22414349	+	cg25839023	chr3:22413492-22414365	Island				cg25839023	0.00428469	7.96e-06	0.0384903
chr11	57315686	+	cg01837788		OpenSea	SMTNL1	NM_001105565	Body	cg01837788	0.00258363	7.96e-06	0.0384903
chr22	31364349	-	cg17098449	chr22:31364564-31365575	N_Shore	TUG1;MORC2	NR_002323;NM_014941	TSS1500;TSS200	cg17098449	-0.00341756	8.03e-06	0.0385802
chr6	113768503	+	cg11070989		OpenSea				cg11070989	-0.00773479	8.12e-06	0.0386991
chr6	21402890	-	cg04897299		OpenSea				cg04897299	-0.00515806	8.24e-06	0.0386991
chr17	38178658	-	cg02590484		OpenSea	MED24;MED24;MED24;MED24;MED24;MED24;MED24;MED24	NM_014815;NM_001267797;NM_001079518;NR_052017;NR_052017;NM_014815;NM_001267797;NM_001079518	ExonBnd;ExonBnd;ExonBnd;ExonBnd;Body;Body;Body;Body	cg02590484	0.00517815	8.24e-06	0.0386991
chr6	24165957	-	cg24835232		OpenSea				cg24835232	-0.00305911	8.25e-06	0.0386991
chr10	14608422	+	cg26256135		OpenSea	FAM107B;FAM107B;FAM107B;FAM107B;FAM107B;FAM107B;FAM107B;FAM107B;FAM107B;FAM107B	NM_001282701;NM_001282698;NM_001282702;NM_001282699;NM_001282703;NM_001282700;NM_001282697;NM_001282696;NM_031453;NM_001282695	5'UTR;5'UTR;5'UTR;5'UTR;5'UTR;5'UTR;5'UTR;5'UTR;Body;5'UTR	cg26256135	-0.00460104	8.42e-06	0.0392717
chr16	66969500	-	cg18607308	chr16:66969499-66969878	Island	FAM96B;CES2;FAM96B;CES2	NR_024525;NM_003869;NM_016062;NM_198061	TSS1500;1stExon;TSS1500;1stExon	cg18607308	0.00182296	8.47e-06	0.0392717
chr1	13820748	+	cg09659000		OpenSea	LRRC38	NM_001010847	Body	cg09659000	0.00806749	8.54e-06	0.0392773
chr13	114814333	-	cg27119904	chr13:114813942-114814457	Island	RASA3	NM_007368	Body	cg27119904	0.00290976	8.59e-06	0.0392773
chr2	86163827	+	cg00533827		OpenSea				cg00533827	-0.00277525	8.61e-06	0.0392773
chr4	117474275	-	cg13990362		OpenSea				cg13990362	-0.00335081	8.73e-06	0.0395731
chr5	134644263	-	cg18765405		OpenSea				cg18765405	-0.00479078	8.83e-06	0.0396445
chr7	20447707	+	cg14959425		OpenSea	ITGB8	NM_002214	Body	cg14959425	-0.00404673	8.91e-06	0.0396445
chr6	29591082	+	cg17930583		OpenSea	GABBR1;GABBR1;GABBR1	NM_021904;NM_021903;NM_001470	Body;Body;Body	cg17930583	-0.00272989	8.93e-06	0.0396445
chr1	230279135	+	cg20703242		OpenSea	GALNT2	NM_004481	Body	cg20703242	0.00260007	8.94e-06	0.0396445
chr11	37533403	-	cg06170374		OpenSea				cg06170374	-0.00485677	8.99e-06	0.0396445
chr19	46526863	+	cg05422993	chr19:46526046-46526334	S_Shore	PGLYRP1	NM_005091	TSS1500	cg05422993	-0.00441623	9.1e-06	0.0397785
chr6	33142006	-	cg15818109		OpenSea	COL11A2;COL11A2;COL11A2	NM_080679;NM_080681;NM_080680	Body;Body;Body	cg15818109	0.00311111	9.16e-06	0.0397785
chr10	80848143	-	cg17823346		OpenSea	ZMIZ1	NM_020338	5'UTR	cg17823346	0.00278608	9.17e-06	0.0397785
chr3	182929476	-	cg15656693		OpenSea	MCF2L2	NM_015078	Body	cg15656693	-0.0041246	9.29e-06	0.0398754
chr20	5466839	-	cg14214717		OpenSea				cg14214717	0.00238225	9.32e-06	0.0398754
chr17	38699371	+	cg05809362		OpenSea				cg05809362	-0.0026502	9.4e-06	0.0398754
chr5	139068516	+	cg01900480		OpenSea				cg01900480	0.00312778	9.41e-06	0.0398754
chr7	106320126	-	cg02695372		OpenSea				cg02695372	-0.00531491	9.46e-06	0.0398754
chr2	219596537	-	cg03487391		OpenSea	TTLL4	NM_014640	5'UTR	cg03487391	-0.00565056	9.49e-06	0.0398754
chr14	106382726	-	cg03224013		OpenSea	KIAA0125	NR_026800	TSS1500	cg03224013	0.00460531	9.66e-06	0.0401047
chr10	105218660	-	cg26955383	chr10:105217966-105218287	S_Shore	CALHM1	NM_001001412	TSS200	cg26955383	0.00452482	9.74e-06	0.0401047
chr3	18031135	-	cg14204372		OpenSea	LOC339862	NM_001257177	Body	cg14204372	-0.00417053	9.85e-06	0.0401047
chr19	47247380	+	cg18146146	chr19:47248749-47249948	N_Shore	STRN4;STRN4	NM_001039877;NM_013403	Body;Body	cg18146146	-0.00576522	9.86e-06	0.0401047
chr3	128959178	+	cg06527396		OpenSea				cg06527396	-0.00447116	9.86e-06	0.0401047
chr12	101604137	+	cg02094077	chr12:101603387-101603933	S_Shore	SLC5A8	NM_145913	TSS200	cg02094077	0.00229037	9.94e-06	0.0401047
chr2	179696896	+	cg06166051		OpenSea	CCDC141	NM_173648	3'UTR	cg06166051	-0.00400269	9.95e-06	0.0401047
chr5	153457958	-	cg22594985		OpenSea				cg22594985	0.00579093	1e-05	0.0401047
chr13	26597180	-	cg21871141		OpenSea				cg21871141	-0.0027747	1e-05	0.0401047
chr6	139794360	-	cg07865630		OpenSea	LOC645434	NR_033919	Body	cg07865630	-0.00748548	1e-05	0.0401047
chr1	6822395	-	cg21457573		OpenSea				cg21457573	-0.00373937	1.02e-05	0.0402074
chr14	104605295	-	cg16321048	chr14:104601959-104605672	Island	KIF26A	NM_015656	Body	cg16321048	0.00384399	1.02e-05	0.0402074
chr9	97402555	-	cg06705237	chr9:97401286-97402067	S_Shore	FBP1;FBP1	NM_001127628;NM_000507	TSS200;TSS1500	cg06705237	-0.0047752	1.03e-05	0.0402074
chr9	132345286	+	cg08303079		OpenSea				cg08303079	-0.00432341	1.03e-05	0.0402074
chr12	6712515	-	cg20600850	chr12:6715500-6715829	N_Shelf	CHD4	NM_001273	Body	cg20600850	0.00315344	1.03e-05	0.0402074
chr21	39592213	+	cg07225450		OpenSea				cg07225450	-0.00805542	1.05e-05	0.0407432
chr2	3487931	+	cg26643996		OpenSea				cg26643996	0.00270651	1.06e-05	0.0408447
chr8	130799093	+	cg26073844		OpenSea	GSDMC;GSDMC	NM_031415;NM_031415	1stExon;5'UTR	cg26073844	-0.00361896	1.06e-05	0.0408447
chr18	52029246	-	cg01436651		OpenSea				cg01436651	-0.0036782	1.07e-05	0.0408447
chr16	81553347	+	cg18685080		OpenSea	CMIP;CMIP	NM_198390;NM_030629	Body;Body	cg18685080	-0.0035803	1.07e-05	0.0408447
chr20	61596335	+	cg12285003		OpenSea	SLC17A9;SLC17A9	NM_022082;NM_001302643	Body;Body	cg12285003	0.00330992	1.1e-05	0.0415221
chr4	40240766	-	cg08928261		OpenSea	RHOH;RHOH;RHOH;RHOH;RHOH;RHOH;RHOH;RHOH;RHOH;RHOH;RHOH;RHOH	NM_001278368;NM_001278367;NM_001278366;NM_001278365;NM_001278364;NM_001278369;NM_004310;NM_001278363;NM_001278362;NM_001278361;NM_001278360;NM_001278359	5'UTR;5'UTR;5'UTR;5'UTR;5'UTR;5'UTR;5'UTR;5'UTR;5'UTR;5'UTR;5'UTR;5'UTR	cg08928261	-0.00511458	1.1e-05	0.0415611
chr4	2794091	+	cg00412094	chr4:2794494-2794875	N_Shore	SH3BP2	NM_001122681	TSS1500	cg00412094	-0.00274312	1.12e-05	0.0419411
chr10	90553647	-	cg27339271		OpenSea				cg27339271	-0.00571871	1.13e-05	0.0420398
chr8	130695235	-	cg18403006		OpenSea				cg18403006	-0.00254345	1.14e-05	0.0420398
chr9	135454197	-	cg00352576	chr9:135455164-135458586	N_Shore				cg00352576	0.0024143	1.14e-05	0.0420398
chr20	8053963	-	cg10834218		OpenSea				cg10834218	-0.0062427	1.14e-05	0.0420398
chr3	53868093	+	cg20248701		OpenSea	CHDH	NM_018397	5'UTR	cg20248701	-0.00476309	1.15e-05	0.0420398
chr4	108853489	-	cg10492511	chr4:108852495-108853387	S_Shore	CYP2U1	NM_183075	Body	cg10492511	0.00461551	1.16e-05	0.0420398
chr11	133835493	+	cg13314505		OpenSea				cg13314505	-0.00365887	1.16e-05	0.0420398
chr20	62367108	-	cg03924136	chr20:62368955-62371962	N_Shore	LIME1;LIME1;LIME1;LIME1;ZGPAT;ZGPAT;ZGPAT;ZGPAT;ZGPAT	NM_017806;NM_001305655;NM_001305654;NM_001305654;NM_181485;NM_001195654;NM_001195653;NM_032527;NM_001083113	TSS1500;TSS1500;1stExon;5'UTR;Body;Body;Body;Body;Body	cg03924136	0.00466175	1.17e-05	0.0420398
chr2	48796151	-	cg06092244		OpenSea	STON1-GTF2A1L	NM_172311	TSS200	cg06092244	-0.00832271	1.19e-05	0.0420398
chr5	17261518	+	cg00812927		OpenSea	BASP1;BASP1	NM_001271606;NM_006317	5'UTR;5'UTR	cg00812927	-0.00383125	1.19e-05	0.0420398
chr5	141475540	-	cg01015210		OpenSea				cg01015210	-0.00525263	1.2e-05	0.0420398
chr5	133515262	-	cg04136748	chr5:133511971-133512902	S_Shelf				cg04136748	-0.00212944	1.2e-05	0.0420398
chr6	41996600	-	cg02024241		OpenSea	CCND3;CCND3;CCND3	NM_001136126;NM_001287434;NM_001136017	5'UTR;5'UTR;5'UTR	cg02024241	-0.00251236	1.22e-05	0.0420398
chr3	141196360	+	cg16498856		OpenSea				cg16498856	-0.00530778	1.22e-05	0.0420398
chr2	109533679	-	cg06636195		OpenSea	EDAR	NM_022336	Body	cg06636195	0.0074646	1.22e-05	0.0420398
chr11	68483493	+	cg25371251		OpenSea	5	NM_004923	Body	cg25371251	-0.00451738	1.23e-05	0.0420398
chr8	118960159	-	cg23554164		OpenSea	EXT1	NM_000127	Body	cg23554164	-0.00380232	1.23e-05	0.0420398
chr1	118139009	+	cg11558387		OpenSea				cg11558387	-0.0043184	1.23e-05	0.0420398
chr5	55350682	+	cg22066978		OpenSea				cg22066978	-0.00410669	1.23e-05	0.0420398
chr18	42475531	+	cg16545370		OpenSea	SETBP1	NM_015559	Body	cg16545370	-0.00407178	1.24e-05	0.0420398
chr1	97990981	-	cg11226378		OpenSea	DPYD	NM_000110	Body	cg11226378	-0.00387741	1.25e-05	0.0420398
chr19	14783092	+	cg16431791		OpenSea	ADGRE3;ADGRE3;ADGRE3	NM_032571;NM_001289159;NM_001289158	Body;Body;Body	cg16431791	0.00498014	1.25e-05	0.0420398
chr7	45075791	+	cg12573289		OpenSea	CCM2;CCM2;CCM2;CCM2;CCM2	NM_031443;NM_001029835;NM_001167935;NM_001167934;NR_030770	Body;Body;Body;Body;Body	cg12573289	0.00181292	1.25e-05	0.0420398
chr8	48265917	-	cg14195992		OpenSea	KIAA0146	NM_001080394	Body	cg14195992	-0.00471708	1.25e-05	0.0420398
chr16	57157904	-	cg21243269		OpenSea	CPNE2	NM_152727	Body	cg21243269	-0.00286023	1.26e-05	0.0420398
chr19	5669909	+	cg17321267		OpenSea				cg17321267	0.00534411	1.27e-05	0.0420398
chr19	46854563	+	cg09977703	chr19:46850185-46850678	S_Shelf	PPP5C	NM_006247	Body	cg09977703	-0.00709955	1.27e-05	0.0420398
chr8	96115124	+	cg03464923		OpenSea				cg03464923	-0.00452788	1.27e-05	0.0420398
chr10	134178970	+	cg20559059		OpenSea	LRRC27;LRRC27;LRRC27	NM_030626;NM_001143757;NM_001309474	Body;Body;Body	cg20559059	0.00278421	1.27e-05	0.0420398
chr16	442770	-	cg16161069		OpenSea	LOC100134368	NR_024453	Body	cg16161069	0.0044824	1.28e-05	0.0420398
chr8	130426887	-	cg23468312		OpenSea	CCDC26;CCDC26;CCDC26;CCDC26	NR_130918;NR_130919;NR_130920;NR_130917	Body;Body;Body;Body	cg23468312	-0.00485017	1.29e-05	0.0422042
chr13	111175670	-	cg26468118		OpenSea	RAB20	NM_017817	3'UTR	cg26468118	-0.00484162	1.3e-05	0.042306
chr11	113905622	+	cg14009097	chr11:113906920-113907332	N_Shore				cg14009097	0.00250529	1.3e-05	0.042306
chr3	51988454	+	cg20804821	chr3:51989763-51990639	N_Shore	GPR62	NM_080865	TSS1500	cg20804821	0.00419323	1.31e-05	0.042306
chr21	38334730	-	cg21081878	chr21:38338384-38338904	N_Shelf	HLCS	NM_000411	5'UTR	cg21081878	0.00520773	1.32e-05	0.0425263
chr15	39746976	+	cg08074885		OpenSea				cg08074885	-0.00549944	1.33e-05	0.0425263
chr16	66781322	+	cg09372332	chr16:66785040-66785875	N_Shelf	DYNC1LI2;DYNC1LI2	NM_006141;NM_001286157	Body;Body	cg09372332	-0.00366179	1.33e-05	0.0425263
chr1	221467746	-	cg09536564		OpenSea				cg09536564	-0.0040354	1.34e-05	0.042545
chr16	474271	+	cg09555736	chr16:474922-476815	N_Shore	RAB11FIP3	NM_014700	TSS1500	cg09555736	0.00473398	1.34e-05	0.042545
chr1	156600922	-	cg07197752		OpenSea				cg07197752	0.00379849	1.34e-05	0.0425518
chr19	11406114	+	cg03263792	chr19:11404512-11404776	S_Shore	TSPAN16	NM_012466	TSS1500	cg03263792	-0.00290397	1.35e-05	0.0425751
chr7	30387954	-	cg08549335		OpenSea	ZNRF2	NM_147128	Body	cg08549335	-0.00921438	1.36e-05	0.0425751
chr16	59934140	-	cg25501329		OpenSea	LOC101927580	NR_110917	Body	cg25501329	0.00538252	1.38e-05	0.0429723
chr16	89023389	+	cg08732950		OpenSea	CBFA2T3	NM_005187	Body	cg08732950	0.00239077	1.39e-05	0.0429723
chr6	170559792	-	cg17108423		OpenSea				cg17108423	0.00330584	1.39e-05	0.0429723
chr14	76046018	+	cg26344619	chr14:76044590-76045102	S_Shore	FLVCR2	NM_017791	Body	cg26344619	-0.0023205	1.4e-05	0.0429723
chr1	185298424	+	cg13827596		OpenSea	GS1-279B7.1	NR_038424	Body	cg13827596	-0.00364196	1.4e-05	0.0429723
chr5	40756846	+	cg15528722	chr5:40755537-40756257	S_Shore	TTC33	NM_012382	TSS1500	cg15528722	-0.0055402	1.4e-05	0.0429723
chr10	28848388	+	cg06097048		OpenSea	WAC;WAC;WAC	NM_016628;NM_100486;NM_100264	Body;Body;Body	cg06097048	0.00247943	1.41e-05	0.0429723
chr10	82363213	-	cg14104280		OpenSea	SH2D4B;SH2D4B	NM_207372;NM_001145719	Body;Body	cg14104280	-0.00548831	1.41e-05	0.0429723
chr20	56794558	-	cg19561181		OpenSea	ANKRD60	NM_001304369	Body	cg19561181	-0.00427929	1.42e-05	0.0429723
chr21	45203404	+	cg12249789	chr21:45206579-45207051	N_Shelf				cg12249789	-0.00391239	1.43e-05	0.0429723
chr11	1799685	+	cg05859409		OpenSea				cg05859409	-0.00557883	1.43e-05	0.0429723
chr4	7755739	+	cg05380304		OpenSea	LOC84740	NR_026892	TSS200	cg05380304	0.00205835	1.45e-05	0.0429723
chr10	94350577	+	cg16060189	chr10:94351356-94351615	N_Shore				cg16060189	0.00336492	1.45e-05	0.0429723
chr5	141551033	-	cg04501408		OpenSea				cg04501408	-0.00338636	1.45e-05	0.0429723
chr6	28885017	+	cg18844029		OpenSea	TRIM27	NM_006510	Body	cg18844029	-0.00588099	1.46e-05	0.0429723
chr14	105104908	-	cg02056986	chr14:105106461-105106666	N_Shore				cg02056986	0.00213185	1.46e-05	0.0429723
chr17	79526378	-	cg01589514		OpenSea	NPLOC4;NPLOC4;NPLOC4	NR_130140;NR_130139;NM_017921	Body;Body;Body	cg01589514	0.00289929	1.46e-05	0.0429723
chr11	5462540	+	cg04874562		OpenSea	OR51I1	NM_001005288	1stExon	cg04874562	0.00289607	1.48e-05	0.04321
chr2	8626420	-	cg18544034		OpenSea				cg18544034	-0.0043314	1.48e-05	0.04321
chr22	17709899	-	cg24418920		OpenSea				cg24418920	-0.00459881	1.49e-05	0.0433223
chr1	5743886	-	cg25198113		OpenSea				cg25198113	0.00218942	1.49e-05	0.0433223
chr3	101707603	+	cg11979298		OpenSea	LOC152225	NR_026934	Body	cg11979298	-0.002955	1.5e-05	0.0435315
chr1	29157255	+	cg12117418		OpenSea	OPRD1	NM_000911	Body	cg12117418	-0.00277061	1.53e-05	0.0437108
chr18	46390193	-	cg18584984	chr18:46386266-46386481	S_Shelf				cg18584984	-0.00356617	1.54e-05	0.0437108
chr20	46113164	+	cg22506773		OpenSea				cg22506773	-0.00314687	1.54e-05	0.0437108
chr3	152856773	-	cg15034393		OpenSea				cg15034393	-0.00613478	1.55e-05	0.0437108
chr10	71206848	-	cg07443710		OpenSea				cg07443710	-0.00472893	1.55e-05	0.0437108
chr19	13892443	+	cg10608465		OpenSea				cg10608465	-0.00281389	1.56e-05	0.0437108
chr1	85773559	-	cg15752247		OpenSea				cg15752247	-0.00334821	1.56e-05	0.0437108
chr13	113746478	-	cg13691684	chr13:113745161-113745644	S_Shore	MCF2L;MCF2L	NM_001112732;NM_024979	Body;Body	cg13691684	-0.00367257	1.56e-05	0.0437108
chr17	66286298	+	cg17916916	chr17:66286541-66288532	N_Shore	ARSG;SLC16A6	NM_014960;NM_004694	5'UTR;5'UTR	cg17916916	0.0030065	1.56e-05	0.0437108
chr15	38122448	-	cg08951566		OpenSea				cg08951566	-0.00312903	1.57e-05	0.0437108
chr17	16749537	+	cg00301390		OpenSea				cg00301390	0.00259639	1.57e-05	0.0437492
chr15	91381597	+	cg09803092		OpenSea				cg09803092	-0.00531232	1.58e-05	0.0437492
chr1	59953216	-	cg27218041		OpenSea	FGGY;FGGY;FGGY;FGGY	NM_018291;NM_001244714;NM_001113411;NR_103473	Body;Body;Body;Body	cg27218041	0.00309836	1.59e-05	0.0437492
chr5	167956414	+	cg10591652	chr5:167956219-167957371	Island	FBLL1	NR_024356	TSS200	cg10591652	0.00531584	1.6e-05	0.0437492
chr4	48972831	-	cg01225452		OpenSea				cg01225452	-0.0036606	1.6e-05	0.0437492
chr5	82664317	-	cg22425699		OpenSea				cg22425699	-0.00854277	1.61e-05	0.0437492
chr20	16156233	+	cg10243030		OpenSea				cg10243030	0.00651343	1.61e-05	0.0437492
chr16	67642367	+	cg25645302		OpenSea	CTCF;CTCF	NM_006565;NM_001191022	5'UTR;5'UTR	cg25645302	-0.00311078	1.61e-05	0.0437492
chr6	14841030	+	cg23013812		OpenSea				cg23013812	-0.00498678	1.63e-05	0.044055
chr22	50154745	+	cg09154528	chr22:50157939-50158217	N_Shelf				cg09154528	-0.00371083	1.64e-05	0.0441408
chr10	115478900	+	cg23879831		OpenSea	CASP7;CASP7;CASP7;CASP7;CASP7;CASP7;CASP7	NM_001267057;NM_033338;NM_033340;NM_001227;NM_001267056;NM_033339;NM_001267058	Body;Body;Body;Body;Body;Body;Body	cg23879831	-0.00303018	1.67e-05	0.0446589
chr1	150573467	-	cg27142757		OpenSea				cg27142757	-0.00520773	1.67e-05	0.0446589
chr4	185828927	-	cg15177686		OpenSea				cg15177686	-0.00378372	1.67e-05	0.0446589
chr1	118176170	+	cg20263249		OpenSea				cg20263249	-0.00274905	1.68e-05	0.0446736
chr7	733282	-	cg03216966		OpenSea	PRKAR1B;PRKAR1B;PRKAR1B;PRKAR1B;PRKAR1B;PRKAR1B	NM_001164759;NM_001164762;NM_001164758;NM_001164760;NM_001164761;NM_002735	Body;Body;Body;Body;Body;Body	cg03216966	-0.00499588	1.69e-05	0.0449676
chr1	117529954	+	cg24687529		OpenSea	PTGFRN	NM_020440	3'UTR	cg24687529	0.00435722	1.7e-05	0.0450199
chr5	133451625	-	cg15413523	chr5:133449320-133451260	S_Shore	TCF7;TCF7;TCF7;TCF7;TCF7;TCF7;TCF7;TCF7;TCF7;TCF7	NM_213648;NM_001134852;NM_201632;NM_201633;NM_001134851;NM_201634;NM_001134851;NM_003202;NM_213648;NM_001134852	5'UTR;1stExon;5'UTR;5'UTR;1stExon;5'UTR;5'UTR;Body;1stExon;5'UTR	cg15413523	0.00194255	1.71e-05	0.0451815
chr14	65459268	-	cg06380030		OpenSea	FNTB;CHURC1-FNTB;CHURC1-FNTB	NM_002028;NM_001202559;NM_001202558	Body;Body;Body	cg06380030	-0.00484763	1.72e-05	0.0452637
chr7	150056200	-	cg26543033		OpenSea				cg26543033	-0.00289041	1.75e-05	0.0455925
chr9	140066934	-	cg11731280	chr9:140068792-140069082	N_Shore	TMEM210	NM_001282477	TSS1500	cg11731280	0.00431621	1.77e-05	0.0455925
chr7	2557446	+	cg05829046	chr7:2558371-2559967	N_Shore	LFNG;LFNG	NM_001166355;NM_002304	Body;TSS200	cg05829046	-0.003439	1.77e-05	0.0455925
chr3	38060329	-	cg21506763		OpenSea	PLCD1;PLCD1;PLCD1	NR_024071;NM_001130964;NM_006225	Body;Body;Body	cg21506763	0.00308731	1.77e-05	0.0455925
chr13	103264306	-	cg27206232		OpenSea	TPP2	NM_003291	Body	cg27206232	0.00413366	1.78e-05	0.0455925
chr10	43895225	+	cg10773266	chr10:43891546-43892917	S_Shelf	HNRNPF;HNRNPF;HNRNPF;HNRNPF	NM_001098205;NM_001098206;NM_001098204;NM_004966	5'UTR;5'UTR;5'UTR;5'UTR	cg10773266	-0.00329203	1.78e-05	0.0455925
chr21	37535885	-	cg05092891		OpenSea	DOPEY2	NM_005128	TSS1500	cg05092891	-0.00465545	1.78e-05	0.0455925
chr8	130799007	-	cg05316065		OpenSea	GSDMC;GSDMC	NM_031415;NM_031415	1stExon;5'UTR	cg05316065	-0.00296605	1.79e-05	0.0455925
chr20	23367377	+	cg12170419		OpenSea	NAPB;NAPB;NAPB;NAPB;NAPB	NR_104266;NM_001283026;NM_022080;NM_001283018;NM_001283020	Body;Body;Body;Body;Body	cg12170419	-0.00534095	1.79e-05	0.0455925
chr6	24934269	-	cg02156526		OpenSea	FAM65B;FAM65B	NM_001286445;NM_001286446	Body;Body	cg02156526	-0.0043086	1.8e-05	0.0455925
chr17	841205	+	cg10241823		OpenSea	NXN	NM_022463	Body	cg10241823	0.00305441	1.81e-05	0.0455925
chr3	167803450	+	cg24899334		OpenSea	GOLIM4;GOLIM4	NM_014498;NM_001308155	Body;Body	cg24899334	-0.00805799	1.81e-05	0.0455925
chr5	168418639	-	cg20644928		OpenSea	SLIT3;SLIT3	NM_003062;NM_001271946	Body;Body	cg20644928	-0.00213453	1.81e-05	0.0455925
chr2	65058570	+	cg08001199		OpenSea				cg08001199	-0.00564877	1.81e-05	0.0455925
chr21	36185960	-	cg01680062		OpenSea	RUNX1;RUNX1	NM_001001890;NM_001754	Body;Body	cg01680062	-0.00377398	1.83e-05	0.0455999
chr1	65157404	+	cg00218114		OpenSea	CACHD1;CACHD1	NM_001293274;NM_020925	3'UTR;3'UTR	cg00218114	-0.00462479	1.83e-05	0.0455999
chr2	26220838	+	cg25269438		OpenSea				cg25269438	-0.00453307	1.84e-05	0.0455999
chr2	179744587	+	cg24780167		OpenSea	CCDC141	NM_173648	5'UTR	cg24780167	-0.00312873	1.84e-05	0.0455999
chr19	17326697	+	cg03504306	chr19:17326114-17326551	S_Shore	USE1	NM_018467	Body	cg03504306	0.00212568	1.85e-05	0.0456694
chr2	239343111	+	cg14187619	chr2:239344401-239344627	N_Shore	ASB1	NM_001040445	Body	cg14187619	-0.00636503	1.85e-05	0.0456694
chr22	40784430	+	cg04323816		OpenSea	SGSM3;SGSM3	NM_015705;NM_001301849	5'UTR;5'UTR	cg04323816	0.00221983	1.86e-05	0.0456803
chr1	172243209	-	cg26365581		OpenSea	DNM3;DNM3	NM_001136127;NM_015569	Body;Body	cg26365581	-0.0050918	1.86e-05	0.0456968
chr2	20232577	-	cg17953136		OpenSea	LAPTM4A	NM_014713	3'UTR	cg17953136	0.00413949	1.88e-05	0.0456968
chr11	109948734	-	cg23305420		OpenSea				cg23305420	-0.00583688	1.88e-05	0.0456968
chr2	11857010	-	cg15549550		OpenSea	LPIN1	NM_001261428	Body	cg15549550	-0.003522	1.89e-05	0.0456968
chr3	124408740	+	cg02293874		OpenSea	KALRN;KALRN	NM_001024660;NM_007064	Body;Body	cg02293874	-0.0037642	1.89e-05	0.0456968
chr7	45200201	+	cg19382191	chr7:45197181-45197807	S_Shelf	RAMP3	NM_005856	Body	cg19382191	0.00362961	1.89e-05	0.0456968
chr20	48959844	-	cg20519581	chr20:48960164-48960373	N_Shore				cg20519581	-0.00478898	1.9e-05	0.0457202
chr19	5983811	+	cg16978321		OpenSea	LOC100128568	NR_046376	Body	cg16978321	-0.00472865	1.92e-05	0.0458866
chr16	1309414	+	cg03856470	chr16:1309157-1309415	Island				cg03856470	0.00217542	1.92e-05	0.0458866
chr15	58777264	-	cg17562163		OpenSea	LOC101928694;LIPC	NR_120338;NM_000236	Body;Body	cg17562163	-0.00298438	1.93e-05	0.0458866
chr22	43686187	-	cg00968118		OpenSea	SCUBE1	NM_173050	Body	cg00968118	0.00288202	1.93e-05	0.0458866
chr7	138426100	+	cg22409916		OpenSea	ATP6V0A4;ATP6V0A4;ATP6V0A4	NM_130841;NM_130840;NM_020632	Body;Body;Body	cg22409916	-0.00503662	1.93e-05	0.0458866
chr1	89061160	-	cg19526722		OpenSea	PKN2-AS1	NR_110682	Body	cg19526722	-0.00507609	1.95e-05	0.0461664
chr19	38761503	+	cg06538039		OpenSea	SPINT2;SPINT2	NM_001166103;NM_021102	Body;Body	cg06538039	-0.00312761	1.96e-05	0.0461873
chr20	33145866	-	cg19579117	chr20:33146135-33147318	N_Shore	MAP1LC3A;MAP1LC3A	NM_032514;NM_181509	TSS1500;Body	cg19579117	0.00274986	1.96e-05	0.0462257
chr12	122293996	+	cg14954838		OpenSea	HPD;HPD	NM_001171993;NM_002150	Body;Body	cg14954838	-0.00649682	1.99e-05	0.046645
chr4	101111162	-	cg09488621	chr4:101111146-101111497	Island	LOC101929353;DDIT4L	NR_125924;NM_145244	TSS200;5'UTR	cg09488621	0.0037401	2e-05	0.0468221
chr8	17521952	-	cg16493813		OpenSea	MTUS1;MTUS1;MTUS1;MTUS1;MTUS1	NM_001001931;NM_001001925;NM_001166393;NM_001001924;NM_020749	Body;Body;Body;Body;Body	cg16493813	-0.00350512	2.01e-05	0.0468268
chr9	140066947	-	cg08960443	chr9:140068792-140069082	N_Shore	TMEM210	NM_001282477	TSS1500	cg08960443	0.00483493	2.03e-05	0.0468268
chr10	134983749	+	cg18330082	chr10:134980302-134981059	S_Shelf	KNDC1	NM_152643	Body	cg18330082	0.00435106	2.03e-05	0.0468268
chr9	101912842	+	cg13827209		OpenSea	TGFBR1;TGFBR1	NM_001130916;NM_004612	3'UTR;3'UTR	cg13827209	0.00647481	2.03e-05	0.0468268
chr15	86195808	+	cg09897881		OpenSea	AKAP13;AKAP13;AKAP13	NM_007200;NM_006738;NM_001270546	Body;Body;Body	cg09897881	-0.00396339	2.03e-05	0.0468268
chr6	153302566	-	cg09298159	chr6:153303408-153304973	N_Shore	FBXO5;FBXO5	NM_012177;NM_001142522	Body;5'UTR	cg09298159	-0.00621843	2.06e-05	0.0473244
chr11	126041925	+	cg24572048		OpenSea				cg24572048	-0.00358582	2.07e-05	0.0473244
chr8	81001528	+	cg04068975		OpenSea	TPD52;TPD52;TPD52;TPD52;TPD52;TPD52;TPD52	NR_105037;NR_105036;NR_105035;NR_105034;NM_005079;NM_001025253;NM_001287144	Body;Body;Body;Body;Body;Body;Body	cg04068975	-0.00353483	2.07e-05	0.0473244
chr5	141339086	+	cg04797496		OpenSea	PCDH12	NM_016580	TSS1500	cg04797496	-0.00310552	2.08e-05	0.0473244
chr5	114935797	+	cg00955413	chr5:114937613-114938149	N_Shore	TMED7-TICAM2;TICAM2;TMED7-TICAM2	NM_001164468;NM_021649;NM_001164469	Body;5'UTR;Body	cg00955413	-0.00317999	2.09e-05	0.0474322
chr8	105848201	-	cg02287483		OpenSea				cg02287483	-0.00356517	2.09e-05	0.0474322
chr3	171866136	+	cg17668435		OpenSea	FNDC3B;FNDC3B	NM_022763;NM_001135095	Body;Body	cg17668435	-0.00284787	2.1e-05	0.0475787
chr10	108785434	+	cg24796548		OpenSea	SORCS1;SORCS1;SORCS1;SORCS1;SORCS1;SORCS1	NM_001013031;NM_001206570;NM_052918;NM_001206572;NM_001206569;NM_001206571	Body;Body;Body;Body;Body;Body	cg24796548	-0.0040294	2.12e-05	0.047787
chr1	206946595	-	cg24274865		OpenSea	IL10	NM_000572	TSS1500	cg24274865	-0.00400851	2.14e-05	0.0481546
chr2	167343774	+	cg05331214		OpenSea	SCN7A	NM_002976	TSS1500	cg05331214	-0.00436251	2.15e-05	0.0481546
chr11	102447295	+	cg13646708		OpenSea				cg13646708	-0.0066479	2.16e-05	0.0481938
chr10	135203102	-	cg18563886	chr10:135203101-135203316	Island	PAOX;PAOX;PAOX	NM_207128;NM_152911;NM_207127	Body;Body;3'UTR	cg18563886	0.00561349	2.17e-05	0.0482558
chr7	91809044	+	cg23192873	chr7:91808331-91808632	S_Shore				cg23192873	0.00255216	2.17e-05	0.0482558
chr12	89575415	-	cg20320863		OpenSea				cg20320863	-0.00510814	2.18e-05	0.0482764
chr18	74648105	-	cg14823672		OpenSea	ZNF236;ZNF236	NM_001306089;NM_007345	Body;Body	cg14823672	-0.00384032	2.18e-05	0.0482764
chr14	24601588	+	cg03047995	chr14:24601498-24601700	Island	FITM1	NM_203402	Body	cg03047995	0.00345247	2.19e-05	0.0483649
chr6	142409507	+	cg20747266	chr6:142409473-142410112	Island	NMBR	NM_002511	1stExon	cg20747266	0.00446882	2.2e-05	0.0484487
chr17	76037562	-	cg24207009	chr17:76037074-76037323	S_Shore	TNRC6C;TNRC6C	NM_018996;NM_001142640	5'UTR;5'UTR	cg24207009	0.00643236	2.23e-05	0.0487345
chr17	13504687	+	cg03436461	chr17:13503829-13505559	Island	HS3ST3A1;HS3ST3A1	NM_006042;NM_006042	1stExon;5'UTR	cg03436461	0.00389665	2.23e-05	0.0487345
chr2	8815947	-	cg19082218	chr2:8816314-8817264	N_Shore	ID2-AS1	NR_110154	Body	cg19082218	-0.00455341	2.25e-05	0.0490265
chr5	136673467	-	cg12005569		OpenSea	SPOCK1	NM_004598	Body	cg12005569	-0.00782907	2.27e-05	0.0494587
chr12	122461621	+	cg20462883		OpenSea	BCL7A;BCL7A	NM_001024808;NM_020993	Body;Body	cg20462883	0.00280134	2.29e-05	0.0496227
chr9	71443046	-	cg09062752		OpenSea	PIP5K1B;PIP5K1B	NM_003558;NM_001278253	Body;Body	cg09062752	-0.00362971	2.3e-05	0.0496227
chr12	109876364	-	cg15562840		OpenSea	MYO1H	NM_001101421	Body	cg15562840	-0.00316128	2.31e-05	0.0496227
chr14	102198604	-	cg06618497		OpenSea	C14orf72	NR_026774	Body	cg06618497	-0.00287179	2.31e-05	0.0496227
chr10	129868149	+	cg24016995		OpenSea	PTPRE;PTPRE	NM_130435;NM_006504	Body;Body	cg24016995	-0.00362462	2.31e-05	0.0496227
chr15	69599744	+	cg19163210		OpenSea	PAQR5	NM_017705	5'UTR	cg19163210	0.00167047	2.33e-05	0.0497744
chr11	113844406	+	cg20991997		OpenSea	HTR3A;HTR3A;HTR3A	NM_213621;NM_000869;NR_046363	TSS1500;TSS1500;TSS1500	cg20991997	0.00451504	2.34e-05	0.0497744
chr19	56990070	+	cg09927569	chr19:56988313-56989741	S_Shore	ZNF667;ZNF667;ZNF667-AS1;ZNF667-AS1	NM_022103;NR_030740;NR_036521;NR_036522	TSS1500;TSS1500;Body;Body	cg09927569	0.00283335	2.34e-05	0.0497744
chr17	42002103	+	cg26456810		OpenSea				cg26456810	-0.00207925	2.35e-05	0.0497744
chr12	54332181	-	cg22830707	chr12:54332805-54333731	N_Shore	HOXC13	NM_017410	TSS1500	cg22830707	0.00223052	2.35e-05	0.0497744
chr2	191916269	+	cg13316148		OpenSea	STAT4	NM_003151	Body	cg13316148	-0.00589612	2.36e-05	0.0497744
chr13	74639083	-	cg03356288		OpenSea	KLF12	NM_007249	5'UTR	cg03356288	-0.00254867	2.36e-05	0.0497744
chr1	155271423	-	cg21985470		OpenSea	PKLR;PKLR	NM_000298;NM_181871	TSS200;TSS1500	cg21985470	-0.00286013	2.37e-05	0.0497744
chr1	112289991	-	cg20127419		OpenSea	FAM212B-AS1;FAM212B-AS1;FAM212B;LOC101928718	NR_038952;NR_038951;NM_198926;NR_125963	Body;Body;Body;Body	cg20127419	-0.00397997	2.38e-05	0.0498837
chr8	42946331	+	cg13257654	chr8:42948532-42948928	N_Shelf				cg13257654	0.00254472	2.39e-05	0.0498837
